# Supplementary material for: The autism-associated gene SYNGAP1 regulates human cortical neurogenesis
Source: Research Square preprint supplement (doi:10.21203/rs.3.rs-1610145/v1), 2022-05-10
Supplement: Supplementary file 2 [file 1f9202f5c4e63a827ef8532c.xlsx]

## Sheet: Proteins
Protein FDR Confidence: Combined	Accession	Description	Gene	Exp. q-value: Combined	Sum PEP Score	Coverage [%]	# Peptides	# PSMs	# Unique Peptides	# AAs	MW [kDa]
High	Q8WZ42	Titin OS=Homo sapiens (Human) OX=9606 GN=TTN PE=1 SV=4	TTN	0.05	1013.88	13	369	515	369	34350	3813.7
High	Q8WXH0	Nesprin-2 OS=Homo sapiens (Human) OX=9606 GN=SYNE2 PE=1 SV=3	SYNE2	0.333	1783.24	47	305	765	305	6885	795.9
High	Q14204	Cytoplasmic dynein 1 heavy chain 1 OS=Homo sapiens (Human) OX=9606 GN=DYNC1H1 PE=1 SV=5	DYNC1H1	0	2576.36	60	269	1801	269	4646	532.1
High	Q9UPN3	Microtubule-actin cross-linking factor 1, isoforms 1/2/3/5 OS=Homo sapiens (Human) OX=9606 GN=MACF1 PE=1 SV=4	MACF1	0.2	1379.63	39	249	589	249	7388	837.8
High	P78527	DNA-dependent protein kinase catalytic subunit OS=Homo sapiens (Human) OX=9606 GN=PRKDC PE=1 SV=3	PRKDC	0	2407.95	60	242	1822	242	4128	468.8
High	Q15149	Plectin OS=Homo sapiens (Human) OX=9606 GN=PLEC PE=1 SV=3	PLEC	0.125	1281.05	51	236	606	236	4684	531.5
High	Q9NU22	Midasin OS=Homo sapiens (Human) OX=9606 GN=MDN1 PE=1 SV=2	MDN1	0.077	1177.42	40	184	487	184	5596	632.4
High	Q7Z6Z7	E3 ubiquitin-protein ligase HUWE1 OS=Homo sapiens (Human) OX=9606 GN=HUWE1 PE=1 SV=3	HUWE1	0.143	1316.52	50	177	608	177	4374	481.6
High	Q09666	Neuroblast differentiation-associated protein AHNAK OS=Homo sapiens (Human) OX=9606 GN=AHNAK PE=1 SV=2	AHNAK	0.043	962.227	56	175	399	175	5890	628.7
High	Q03001	Dystonin OS=Homo sapiens (Human) OX=9606 GN=DST PE=1 SV=4	DST	0.015	650.18	26	174	273	174	7570	860.1
High	Q5T4S7	E3 ubiquitin-protein ligase UBR4 OS=Homo sapiens (Human) OX=9606 GN=UBR4 PE=1 SV=1	UBR4	0.048	1000.18	37	161	440	161	5183	573.5
High	Q13813	Spectrin alpha chain, non-erythrocytic 1 OS=Homo sapiens (Human) OX=9606 GN=SPTAN1 PE=1 SV=3	SPTAN1	0.059	1153.54	64	159	515	159	2472	284.4
High	Q8NCM8	Cytoplasmic dynein 2 heavy chain 1 OS=Homo sapiens (Human) OX=9606 GN=DYNC2H1 PE=1 SV=4	DYNC2H1	0.023	767.401	40	155	339	155	4307	492.3
High	P46013	Proliferation marker protein Ki-67 OS=Homo sapiens (Human) OX=9606 GN=MKI67 PE=1 SV=2	MKI67	0.034	886.524	59	154	383	154	3256	358.5
High	P35579	Myosin-9 OS=Homo sapiens (Human) OX=9606 GN=MYH9 PE=1 SV=4	MYH9	0.25	1586.09	64	149	1123	149	1960	226.4
High	P49792	E3 SUMO-protein ligase RanBP2 OS=Homo sapiens (Human) OX=9606 GN=RANBP2 PE=1 SV=2	RANBP2	0.04	944.714	51	145	425	145	3224	358
High	Q07954	Prolow-density lipoprotein receptor-related protein 1 OS=Homo sapiens (Human) OX=9606 GN=LRP1 PE=1 SV=2	LRP1	0.03	848.438	42	142	384	142	4544	504.3
High	P21333	Filamin-A OS=Homo sapiens (Human) OX=9606 GN=FLNA PE=1 SV=4	FLNA	0.167	1377.91	68	139	849	139	2647	280.6
High	Q01484	Ankyrin-2 OS=Homo sapiens (Human) OX=9606 GN=ANK2 PE=1 SV=4	ANK2	0.026	787.649	45	139	310	139	3957	433.4
High	Q99996	A-kinase anchor protein 9 OS=Homo sapiens (Human) OX=9606 GN=AKAP9 PE=1 SV=4	AKAP9	0.013	620.612	40	136	227	136	3907	452.7
High	Q9NZJ4	Sacsin OS=Homo sapiens (Human) OX=9606 GN=SACS PE=1 SV=2	SACS	0.013	626.483	33	135	254	135	4579	520.8
High	P46821	Microtubule-associated protein 1B OS=Homo sapiens (Human) OX=9606 GN=MAP1B PE=1 SV=2	MAP1B	0.1	1268.21	61	133	733	133	2468	270.5
High	P98164	Low-density lipoprotein receptor-related protein 2 OS=Homo sapiens (Human) OX=9606 GN=LRP2 PE=1 SV=3	LRP2	0.024	779.419	38	130	364	130	4655	521.6
High	Q6P2Q9	Pre-mRNA-processing-splicing factor 8 OS=Homo sapiens (Human) OX=9606 GN=PRPF8 PE=1 SV=2	PRPF8	0.083	1223.35	60	128	828	128	2335	273.4
High	P49327	Fatty acid synthase OS=Homo sapiens (Human) OX=9606 GN=FASN PE=1 SV=3	FASN	0.063	1166.33	59	128	1007	128	2511	273.3
High	Q92616	eIF-2-alpha kinase activator GCN1 OS=Homo sapiens (Human) OX=9606 GN=GCN1 PE=1 SV=6	GCN1	0.038	909.662	53	128	435	128	2671	292.6
High	Q14980	Nuclear mitotic apparatus protein 1 OS=Homo sapiens (Human) OX=9606 GN=NUMA1 PE=1 SV=2	NUMA1	0.037	900.114	64	126	438	126	2115	238.1
High	P35580	Myosin-10 OS=Homo sapiens (Human) OX=9606 GN=MYH10 PE=1 SV=3	MYH10	0.111	1276.22	54	125	900	125	1976	228.9
High	Q01082	Spectrin beta chain, non-erythrocytic 1 OS=Homo sapiens (Human) OX=9606 GN=SPTBN1 PE=1 SV=2	SPTBN1	0.036	896.102	52	119	510	119	2364	274.4
High	Q14789	Golgin subfamily B member 1 OS=Homo sapiens (Human) OX=9606 GN=GOLGB1 PE=1 SV=2	GOLGB1	0.011	579.358	39	119	215	119	3259	375.8
High	O75643	U5 small nuclear ribonucleoprotein 200 kDa helicase OS=Homo sapiens (Human) OX=9606 GN=SNRNP200 PE=1 SV=2	SNRNP200	0.053	1025.99	55	115	748	115	2136	244.4
High	Q9Y520	Protein PRRC2C OS=Homo sapiens (Human) OX=9606 GN=PRRC2C PE=1 SV=4	PRRC2C	0.016	663.57	41	112	350	112	2896	316.7
High	Q96Q15	Serine/threonine-protein kinase SMG1 OS=Homo sapiens (Human) OX=9606 GN=SMG1 PE=1 SV=3	SMG1	0.008	532.188	35	112	213	112	3661	410.2
High	P12270	Nucleoprotein TPR OS=Homo sapiens (Human) OX=9606 GN=TPR PE=1 SV=3	TPR	0.021	739.321	48	111	371	111	2363	267.1
High	Q14152	Eukaryotic translation initiation factor 3 subunit A OS=Homo sapiens (Human) OX=9606 GN=EIF3A PE=1 SV=1	EIF3A	0.022	742.378	64	109	529	109	1382	166.5
High	P49454	Centromere protein F OS=Homo sapiens (Human) OX=9606 GN=CENPF PE=1 SV=3	CENPF	0.008	535.21	36	109	220	109	3114	357.3
High	Q9Y4A5	Transformation/transcription domain-associated protein OS=Homo sapiens (Human) OX=9606 GN=TRRAP PE=1 SV=3	TRRAP	0.013	627.62	33	108	261	108	3859	437.3
High	P98160	Basement membrane-specific heparan sulfate proteoglycan core protein OS=Homo sapiens (Human) OX=9606 GN=HSPG2 PE=1 SV=4	HSPG2	0.012	606.087	38	106	243	106	4391	468.5
High	O75369	Filamin-B OS=Homo sapiens (Human) OX=9606 GN=FLNB PE=1 SV=2	FLNB	0.02	731.971	56	105	319	105	2602	278
High	Q9P2D1	Chromodomain-helicase-DNA-binding protein 7 OS=Homo sapiens (Human) OX=9606 GN=CHD7 PE=1 SV=3	CHD7	0.015	649.874	43	105	265	105	2997	335.7
High	P48681	Nestin OS=Homo sapiens (Human) OX=9606 GN=NES PE=1 SV=2	NES	0.067	1170.87	79	104	656	104	1621	177.3
High	Q12830	Nucleosome-remodeling factor subunit BPTF OS=Homo sapiens (Human) OX=9606 GN=BPTF PE=1 SV=3	BPTF	0.01	577.054	37	103	246	103	3046	338.1
High	Q14839	Chromodomain-helicase-DNA-binding protein 4 OS=Homo sapiens (Human) OX=9606 GN=CHD4 PE=1 SV=2	CHD4	0.056	1043.75	57	101	679	101	1912	217.9
High	P11717	Cation-independent mannose-6-phosphate receptor OS=Homo sapiens (Human) OX=9606 GN=IGF2R PE=1 SV=3	IGF2R	0.016	658.747	53	101	318	101	2491	274.2
High	Q96T58	Msx2-interacting protein OS=Homo sapiens (Human) OX=9606 GN=SPEN PE=1 SV=1	SPEN	0.006	495.654	35	101	198	101	3664	402
High	Q9Y490	Talin-1 OS=Homo sapiens (Human) OX=9606 GN=TLN1 PE=1 SV=3	TLN1	0.014	638.652	45	100	302	100	2541	269.6
High	P27708	CAD protein OS=Homo sapiens (Human) OX=9606 GN=CAD PE=1 SV=3	CAD	0.029	822.253	59	98	521	98	2225	242.8
High	A6NHR9	Structural maintenance of chromosomes flexible hinge domain-containing protein 1 OS=Homo sapiens (Human) OX=9606 GN=SMCHD1 PE=1 SV=2	SMCHD1	0.014	627.93	49	98	310	98	2005	226.2
High	Q8NFC6	Biorientation of chromosomes in cell division protein 1-like 1 OS=Homo sapiens (Human) OX=9606 GN=BOD1L1 PE=1 SV=2	BOD1L1	0.006	485.433	36	98	193	98	3051	330.3
High	Q709C8	Vacuolar protein sorting-associated protein 13C OS=Homo sapiens (Human) OX=9606 GN=VPS13C PE=1 SV=1	VPS13C	0.005	472.929	31	98	186	98	3753	422.1
High	P46939	Utrophin OS=Homo sapiens (Human) OX=9606 GN=UTRN PE=1 SV=2	UTRN	0.004	438.342	34	98	173	98	3433	394.2
High	Q14008	Cytoskeleton-associated protein 5 OS=Homo sapiens (Human) OX=9606 GN=CKAP5 PE=1 SV=3	CKAP5	0.017	670.277	49	97	350	97	2032	225.4
High	Q12789	General transcription factor 3C polypeptide 1 OS=Homo sapiens (Human) OX=9606 GN=GTF3C1 PE=1 SV=4	GTF3C1	0.011	591.515	50	97	274	97	2109	238.7
High	Q5TZA2	Rootletin OS=Homo sapiens (Human) OX=9606 GN=CROCC PE=1 SV=1	CROCC	0.005	459.891	47	97	186	97	2017	228.4
High	O15020	Spectrin beta chain, non-erythrocytic 2 OS=Homo sapiens (Human) OX=9606 GN=SPTBN2 PE=1 SV=3	SPTBN2	0.006	487.977	44	96	210	96	2390	271.2
High	Q9NR09	Baculoviral IAP repeat-containing protein 6 OS=Homo sapiens (Human) OX=9606 GN=BIRC6 PE=1 SV=2	BIRC6	0.005	448.346	29	96	172	96	4857	529.9
High	P15924	Desmoplakin OS=Homo sapiens (Human) OX=9606 GN=DSP PE=1 SV=3	DSP	0.004	420.544	34	96	168	96	2871	331.6
High	P07814	Bifunctional glutamate/proline--tRNA ligase OS=Homo sapiens (Human) OX=9606 GN=EPRS1 PE=1 SV=5	EPRS1	0.031	861.09	58	95	571	95	1512	170.5
High	Q8TCU4	Alstrom syndrome protein 1 OS=Homo sapiens (Human) OX=9606 GN=ALMS1 PE=1 SV=4	ALMS1	0.002	336.377	33	95	148	95	4168	460.8
High	O95714	E3 ubiquitin-protein ligase HERC2 OS=Homo sapiens (Human) OX=9606 GN=HERC2 PE=1 SV=2	HERC2	0.004	408.811	27	93	179	93	4834	526.9
High	Q14683	Structural maintenance of chromosomes protein 1A OS=Homo sapiens (Human) OX=9606 GN=SMC1A PE=1 SV=2	SMC1A	0.016	659.698	64	92	384	92	1233	143.1
High	O75592	E3 ubiquitin-protein ligase MYCBP2 OS=Homo sapiens (Human) OX=9606 GN=MYCBP2 PE=1 SV=4	MYCBP2	0.003	398.836	25	92	154	92	4678	513.3
High	Q02952	A-kinase anchor protein 12 OS=Homo sapiens (Human) OX=9606 GN=AKAP12 PE=1 SV=4	AKAP12	0.042	954.763	71	91	334	91	1782	191.4
High	Q12923	Tyrosine-protein phosphatase non-receptor type 13 OS=Homo sapiens (Human) OX=9606 GN=PTPN13 PE=1 SV=2	PTPN13	0.011	579.039	45	91	224	91	2485	276.7
High	Q14690	Protein RRP5 homolog OS=Homo sapiens (Human) OX=9606 GN=PDCD11 PE=1 SV=3	PDCD11	0.01	577.189	51	91	275	91	1871	208.6
High	P35555	Fibrillin-1 OS=Homo sapiens (Human) OX=9606 GN=FBN1 PE=1 SV=4	FBN1	0.005	450.036	47	91	179	91	2871	312.1
High	Q93008	Probable ubiquitin carboxyl-terminal hydrolase FAF-X OS=Homo sapiens (Human) OX=9606 GN=USP9X PE=1 SV=4	USP9X	0.01	572.672	47	90	271	90	2554	290.3
High	O95071	E3 ubiquitin-protein ligase UBR5 OS=Homo sapiens (Human) OX=9606 GN=UBR5 PE=1 SV=2	UBR5	0.009	544.15	42	90	210	90	2799	309.2
High	P50851	Lipopolysaccharide-responsive and beige-like anchor protein OS=Homo sapiens (Human) OX=9606 GN=LRBA PE=1 SV=4	LRBA	0.009	540.481	38	90	218	90	2863	318.9
High	Q5UIP0	Telomere-associated protein RIF1 OS=Homo sapiens (Human) OX=9606 GN=RIF1 PE=1 SV=2	RIF1	0.009	538.765	52	90	186	90	2472	274.3
High	P46100	Transcriptional regulator ATRX OS=Homo sapiens (Human) OX=9606 GN=ATRX PE=1 SV=5	ATRX	0.007	514.827	40	90	213	90	2492	282.4
High	Q13315	Serine-protein kinase ATM OS=Homo sapiens (Human) OX=9606 GN=ATM PE=1 SV=4	ATM	0.006	489.547	32	90	214	90	3056	350.5
High	Q12888	TP53-binding protein 1 OS=Homo sapiens (Human) OX=9606 GN=TP53BP1 PE=1 SV=2	TP53BP1	0.018	675.595	62	89	288	89	1972	213.4
High	Q9UQ35	Serine/arginine repetitive matrix protein 2 OS=Homo sapiens (Human) OX=9606 GN=SRRM2 PE=1 SV=2	SRRM2	0.009	558.855	37	89	244	89	2752	299.4
High	Q63HN8	E3 ubiquitin-protein ligase RNF213 OS=Homo sapiens (Human) OX=9606 GN=RNF213 PE=1 SV=3	RNF213	0.003	355.792	21	89	127	89	5207	591
High	Q00610	Clathrin heavy chain 1 OS=Homo sapiens (Human) OX=9606 GN=CLTC PE=1 SV=5	CLTC	0.045	980.142	57	88	806	88	1675	191.5
High	P42704	Leucine-rich PPR motif-containing protein, mitochondrial OS=Homo sapiens (Human) OX=9606 GN=LRPPRC PE=1 SV=3	LRPPRC	0.029	840.133	65	88	524	88	1394	157.8
High	P11388	DNA topoisomerase 2-alpha OS=Homo sapiens (Human) OX=9606 GN=TOP2A PE=1 SV=3	TOP2A	0.019	695.18	56	88	436	88	1531	174.3
High	Q86U86	Protein polybromo-1 OS=Homo sapiens (Human) OX=9606 GN=PBRM1 PE=1 SV=1	PBRM1	0.011	583.233	56	88	271	88	1689	192.8
High	Q8NEY1	Neuron navigator 1 OS=Homo sapiens (Human) OX=9606 GN=NAV1 PE=1 SV=2	NAV1	0.01	576.369	57	88	271	88	1877	202.3
High	P49750	YLP motif-containing protein 1 OS=Homo sapiens (Human) OX=9606 GN=YLPM1 PE=1 SV=4	YLPM1	0.016	658.043	46	87	290	87	2146	241.5
High	P78559	Microtubule-associated protein 1A OS=Homo sapiens (Human) OX=9606 GN=MAP1A PE=1 SV=6	MAP1A	0.01	565.832	43	87	201	87	2803	305.3
High	Q96JM2	Zinc finger protein 462 OS=Homo sapiens (Human) OX=9606 GN=ZNF462 PE=1 SV=3	ZNF462	0.007	514.613	39	87	219	87	2506	284.5
High	P25391	Laminin subunit alpha-1 OS=Homo sapiens (Human) OX=9606 GN=LAMA1 PE=1 SV=2	LAMA1	0.007	505.046	41	87	209	87	3075	336.9
High	O14686	Histone-lysine N-methyltransferase 2D OS=Homo sapiens (Human) OX=9606 GN=KMT2D PE=1 SV=2	KMT2D	0.003	350.034	29	87	136	87	5537	593
High	A5YKK6	CCR4-NOT transcription complex subunit 1 OS=Homo sapiens (Human) OX=9606 GN=CNOT1 PE=1 SV=2	CNOT1	0.011	584.669	41	85	304	85	2376	266.8
High	P11137	Microtubule-associated protein 2 OS=Homo sapiens (Human) OX=9606 GN=MAP2 PE=1 SV=4	MAP2	0.011	583.531	54	85	324	85	1827	199.4
High	Q9UQE7	Structural maintenance of chromosomes protein 3 OS=Homo sapiens (Human) OX=9606 GN=SMC3 PE=1 SV=2	SMC3	0.009	537.324	58	85	273	85	1217	141.5
High	Q8IWI9	MAX gene-associated protein OS=Homo sapiens (Human) OX=9606 GN=MGA PE=1 SV=4	MGA	0.003	372.601	34	85	144	85	3065	336
High	Q5VT06	Centrosome-associated protein 350 OS=Homo sapiens (Human) OX=9606 GN=CEP350 PE=1 SV=1	CEP350	0.002	315.006	35	85	126	85	3117	350.7
High	P46940	Ras GTPase-activating-like protein IQGAP1 OS=Homo sapiens (Human) OX=9606 GN=IQGAP1 PE=1 SV=1	IQGAP1	0.012	607.23	52	84	333	84	1657	189.1
High	Q13085	Acetyl-CoA carboxylase 1 OS=Homo sapiens (Human) OX=9606 GN=ACACA PE=1 SV=2	ACACA	0.011	591.939	45	84	298	84	2346	265.4
High	P24928	DNA-directed RNA polymerase II subunit RPB1 OS=Homo sapiens (Human) OX=9606 GN=POLR2A PE=1 SV=2	POLR2A	0.01	564.504	43	84	289	84	1970	217
High	Q86UP2	Kinectin OS=Homo sapiens (Human) OX=9606 GN=KTN1 PE=1 SV=1	KTN1	0.007	504.185	55	84	218	84	1357	156.2
High	P42858	Huntingtin OS=Homo sapiens (Human) OX=9606 GN=HTT PE=1 SV=2	HTT	0.006	491.678	33	84	211	84	3142	347.4
High	P50748	Kinetochore-associated protein 1 OS=Homo sapiens (Human) OX=9606 GN=KNTC1 PE=1 SV=1	KNTC1	0.006	476.754	38	84	238	84	2209	250.6
High	Q12802	A-kinase anchor protein 13 OS=Homo sapiens (Human) OX=9606 GN=AKAP13 PE=1 SV=2	AKAP13	0.005	455.048	42	84	175	84	2813	307.4
High	Q6KC79	Nipped-B-like protein OS=Homo sapiens (Human) OX=9606 GN=NIPBL PE=1 SV=2	NIPBL	0.004	418.974	35	84	195	84	2804	315.9
High	Q03164	Histone-lysine N-methyltransferase 2A OS=Homo sapiens (Human) OX=9606 GN=KMT2A PE=1 SV=5	KMT2A	0.003	375.179	29	84	140	84	3969	431.5
High	O95613	Pericentrin OS=Homo sapiens (Human) OX=9606 GN=PCNT PE=1 SV=4	PCNT	0.002	320.342	29	84	130	84	3336	377.8
High	O14578	Citron Rho-interacting kinase OS=Homo sapiens (Human) OX=9606 GN=CIT PE=1 SV=2	CIT	0.003	385.933	40	82	157	82	2027	231.3
High	Q3V6T2	Girdin OS=Homo sapiens (Human) OX=9606 GN=CCDC88A PE=1 SV=2	CCDC88A	0.003	380.939	40	82	183	82	1871	215.9
High	Q13439	Golgin subfamily A member 4 OS=Homo sapiens (Human) OX=9606 GN=GOLGA4 PE=1 SV=1	GOLGA4	0.002	304.412	36	82	118	82	2230	261
High	P09874	Poly [ADP-ribose] polymerase 1 OS=Homo sapiens (Human) OX=9606 GN=PARP1 PE=1 SV=4	PARP1	0.027	799.609	67	81	836	81	1014	113
High	P18206	Vinculin OS=Homo sapiens (Human) OX=9606 GN=VCL PE=1 SV=4	VCL	0.015	657.387	71	81	479	81	1134	123.7
High	Q02880	DNA topoisomerase 2-beta OS=Homo sapiens (Human) OX=9606 GN=TOP2B PE=1 SV=3	TOP2B	0.008	535.515	50	81	290	81	1626	183.2
High	O75533	Splicing factor 3B subunit 1 OS=Homo sapiens (Human) OX=9606 GN=SF3B1 PE=1 SV=3	SF3B1	0.032	863.029	69	79	579	79	1304	145.7
High	Q5JSL3	Dedicator of cytokinesis protein 11 OS=Homo sapiens (Human) OX=9606 GN=DOCK11 PE=1 SV=2	DOCK11	0.005	449.303	44	79	205	79	2073	237.5
High	O75691	Small subunit processome component 20 homolog OS=Homo sapiens (Human) OX=9606 GN=UTP20 PE=1 SV=3	UTP20	0.004	431.712	30	79	178	79	2785	318.2
High	Q15751	Probable E3 ubiquitin-protein ligase HERC1 OS=Homo sapiens (Human) OX=9606 GN=HERC1 PE=1 SV=2	HERC1	0.003	350.413	26	79	132	79	4861	531.9
High	Q7LBC6	Lysine-specific demethylase 3B OS=Homo sapiens (Human) OX=9606 GN=KDM3B PE=1 SV=2	KDM3B	0.008	533.438	57	78	250	78	1761	191.5
High	Q14315	Filamin-C OS=Homo sapiens (Human) OX=9606 GN=FLNC PE=1 SV=3	FLNC	0.003	380.185	39	78	127	78	2725	290.8
High	Q9BYW2	Histone-lysine N-methyltransferase SETD2 OS=Homo sapiens (Human) OX=9606 GN=SETD2 PE=1 SV=3	SETD2	0.002	307.819	39	78	112	78	2564	287.4
High	P48634	Protein PRRC2A OS=Homo sapiens (Human) OX=9606 GN=PRRC2A PE=1 SV=3	PRRC2A	0.006	496.923	44	77	265	77	2157	228.7
High	Q9P2E9	Ribosome-binding protein 1 OS=Homo sapiens (Human) OX=9606 GN=RRBP1 PE=1 SV=5	RRBP1	0.006	484.131	67	77	233	77	1410	152.4
High	Q7Z460	CLIP-associating protein 1 OS=Homo sapiens (Human) OX=9606 GN=CLASP1 PE=1 SV=1	CLASP1	0.006	478.008	53	77	222	77	1538	169.3
High	Q58EX2	Protein sidekick-2 OS=Homo sapiens (Human) OX=9606 GN=SDK2 PE=1 SV=3	SDK2	0.005	472.165	47	77	223	77	2172	239.2
High	Q07157	Tight junction protein ZO-1 OS=Homo sapiens (Human) OX=9606 GN=TJP1 PE=1 SV=3	TJP1	0.005	445.878	51	77	214	77	1748	195.3
High	Q9BTC0	Death-inducer obliterator 1 OS=Homo sapiens (Human) OX=9606 GN=DIDO1 PE=1 SV=5	DIDO1	0.004	406.006	41	77	155	77	2240	243.7
High	ALBU_BOVIN	(Common contaminant protein)		0.091	1267.96	88	76	8591	76	607	69.2
High	Q92878	DNA repair protein RAD50 OS=Homo sapiens (Human) OX=9606 GN=RAD50 PE=1 SV=1	RAD50	0.005	457.394	52	76	220	76	1312	153.8
High	Q14676	Mediator of DNA damage checkpoint protein 1 OS=Homo sapiens (Human) OX=9606 GN=MDC1 PE=1 SV=3	MDC1	0.023	771.16	55	75	285	75	2089	226.5
High	Q9NTJ3	Structural maintenance of chromosomes protein 4 OS=Homo sapiens (Human) OX=9606 GN=SMC4 PE=1 SV=2	SMC4	0.009	540.781	56	75	304	75	1288	147.1
High	P55196	Afadin OS=Homo sapiens (Human) OX=9606 GN=AFDN PE=1 SV=3	AFDN	0.006	479.975	52	75	200	75	1824	206.7
High	Q15154	Pericentriolar material 1 protein OS=Homo sapiens (Human) OX=9606 GN=PCM1 PE=1 SV=5	PCM1	0.005	456.391	50	75	217	75	2024	228.4
High	Q8WYP5	Protein ELYS OS=Homo sapiens (Human) OX=9606 GN=AHCTF1 PE=1 SV=3	AHCTF1	0.005	454.99	39	75	182	75	2266	252.3
High	Q13576	Ras GTPase-activating-like protein IQGAP2 OS=Homo sapiens (Human) OX=9606 GN=IQGAP2 PE=1 SV=4	IQGAP2	0.003	391.253	55	75	168	75	1575	180.5
High	P58107	Epiplakin OS=Homo sapiens (Human) OX=9606 GN=EPPK1 PE=1 SV=3	EPPK1	0.003	364.184	35	75	146	75	5088	555.3
High	Q86UP3	Zinc finger homeobox protein 4 OS=Homo sapiens (Human) OX=9606 GN=ZFHX4 PE=1 SV=1	ZFHX4	0.002	335.382	25	75	138	75	3567	393.5
High	Q04637	Eukaryotic translation initiation factor 4 gamma 1 OS=Homo sapiens (Human) OX=9606 GN=EIF4G1 PE=1 SV=4	EIF4G1	0.015	657.321	47	74	440	74	1599	175.4
High	O95347	Structural maintenance of chromosomes protein 2 OS=Homo sapiens (Human) OX=9606 GN=SMC2 PE=1 SV=2	SMC2	0.005	462.974	54	74	278	74	1197	135.6
High	O14646	Chromodomain-helicase-DNA-binding protein 1 OS=Homo sapiens (Human) OX=9606 GN=CHD1 PE=1 SV=2	CHD1	0.005	453.357	43	73	232	73	1710	196.6
High	O75165	DnaJ homolog subfamily C member 13 OS=Homo sapiens (Human) OX=9606 GN=DNAJC13 PE=1 SV=5	DNAJC13	0.004	439.915	39	73	178	73	2243	254.3
High	P21359	Neurofibromin OS=Homo sapiens (Human) OX=9606 GN=NF1 PE=1 SV=2	NF1	0.003	374.499	32	73	139	73	2839	319.2
High	P53621	Coatomer subunit alpha OS=Homo sapiens (Human) OX=9606 GN=COPA PE=1 SV=2	COPA	0.011	587.984	62	72	342	72	1224	138.3
High	Q5SZK8	FRAS1-related extracellular matrix protein 2 OS=Homo sapiens (Human) OX=9606 GN=FREM2 PE=1 SV=2	FREM2	0.002	340.08	30	72	128	72	3169	350.9
High	Q70CQ2	Ubiquitin carboxyl-terminal hydrolase 34 OS=Homo sapiens (Human) OX=9606 GN=USP34 PE=1 SV=2	USP34	0.002	319.934	26	72	123	72	3546	404
High	Q14966	Zinc finger protein 638 OS=Homo sapiens (Human) OX=9606 GN=ZNF638 PE=1 SV=2	ZNF638	0.005	449.143	42	71	206	71	1978	220.5
High	Q5JRA6	Transport and Golgi organization protein 1 homolog OS=Homo sapiens (Human) OX=9606 GN=MIA3 PE=1 SV=1	MIA3	0.004	425.761	47	71	169	71	1907	213.6
High	Q9UPU5	Ubiquitin carboxyl-terminal hydrolase 24 OS=Homo sapiens (Human) OX=9606 GN=USP24 PE=1 SV=3	USP24	0.004	421.481	33	71	181	71	2620	294.2
High	Q92614	Unconventional myosin-XVIIIa OS=Homo sapiens (Human) OX=9606 GN=MYO18A PE=1 SV=3	MYO18A	0.003	384.988	36	71	147	71	2054	233
High	O14497	AT-rich interactive domain-containing protein 1A OS=Homo sapiens (Human) OX=9606 GN=ARID1A PE=1 SV=3	ARID1A	0.008	518.066	50	70	222	70	2285	241.9
High	Q9UIG0	Tyrosine-protein kinase BAZ1B OS=Homo sapiens (Human) OX=9606 GN=BAZ1B PE=1 SV=2	BAZ1B	0.006	473.213	51	70	239	70	1483	170.8
High	Q9Y4I1	Unconventional myosin-Va OS=Homo sapiens (Human) OX=9606 GN=MYO5A PE=1 SV=2	MYO5A	0.003	363.35	40	70	138	70	1855	215.3
High	P51532	Transcription activator BRG1 OS=Homo sapiens (Human) OX=9606 GN=SMARCA4 PE=1 SV=2	SMARCA4	0.017	671.814	51	69	423	69	1647	184.5
High	Q9UKV3	Apoptotic chromatin condensation inducer in the nucleus OS=Homo sapiens (Human) OX=9606 GN=ACIN1 PE=1 SV=2	ACIN1	0.01	563.066	54	69	376	69	1341	151.8
High	Q7KZ85	Transcription elongation factor SPT6 OS=Homo sapiens (Human) OX=9606 GN=SUPT6H PE=1 SV=2	SUPT6H	0.004	437.958	49	69	202	69	1726	198.9
High	Q13620	Cullin-4B OS=Homo sapiens (Human) OX=9606 GN=CUL4B PE=1 SV=4	CUL4B	0.004	406.156	66	69	220	69	913	103.9
High	P78332	RNA-binding protein 6 OS=Homo sapiens (Human) OX=9606 GN=RBM6 PE=1 SV=5	RBM6	0.002	330.722	55	69	160	69	1123	128.6
High	Q9P219	Protein Daple OS=Homo sapiens (Human) OX=9606 GN=CCDC88C PE=1 SV=3	CCDC88C	0.002	292.844	39	69	125	69	2028	228.1
High	Q08211	ATP-dependent RNA helicase A OS=Homo sapiens (Human) OX=9606 GN=DHX9 PE=1 SV=4	DHX9	0.026	790.125	59	68	829	68	1270	140.9
High	Q00341	Vigilin OS=Homo sapiens (Human) OX=9606 GN=HDLBP PE=1 SV=2	HDLBP	0.005	465.07	56	68	291	68	1268	141.4
High	Q92621	Nuclear pore complex protein Nup205 OS=Homo sapiens (Human) OX=9606 GN=NUP205 PE=1 SV=3	NUP205	0.005	454.701	36	68	237	68	2012	227.8
High	Q8WWQ0	PH-interacting protein OS=Homo sapiens (Human) OX=9606 GN=PHIP PE=1 SV=2	PHIP	0.004	415.409	45	68	163	68	1821	206.6
High	O60333	Kinesin-like protein KIF1B OS=Homo sapiens (Human) OX=9606 GN=KIF1B PE=1 SV=5	KIF1B	0.004	409.778	46	68	185	68	1816	204.3
High	Q9NS87	Kinesin-like protein KIF15 OS=Homo sapiens (Human) OX=9606 GN=KIF15 PE=1 SV=1	KIF15	0.002	335.229	51	68	137	68	1388	160.1
High	P35908	Keratin, type II cytoskeletal 2 epidermal OS=Homo sapiens (Human) OX=9606 GN=KRT2 PE=1 SV=2	KRT2	0.018	679.301	92	67	758	67	639	65.4
High	P26358	DNA (cytosine-5)-methyltransferase 1 OS=Homo sapiens (Human) OX=9606 GN=DNMT1 PE=1 SV=2	DNMT1	0.008	529.207	46	67	259	67	1616	183.1
High	Q9NYU2	UDP-glucose:glycoprotein glucosyltransferase 1 OS=Homo sapiens (Human) OX=9606 GN=UGGT1 PE=1 SV=3	UGGT1	0.007	510.182	55	67	269	67	1555	177.1
High	Q15021	Condensin complex subunit 1 OS=Homo sapiens (Human) OX=9606 GN=NCAPD2 PE=1 SV=3	NCAPD2	0.006	484.434	52	67	238	67	1401	157.1
High	O95425	Supervillin OS=Homo sapiens (Human) OX=9606 GN=SVIL PE=1 SV=2	SVIL	0.003	366.345	38	67	139	67	2214	247.6
High	Q8N3C0	Activating signal cointegrator 1 complex subunit 3 OS=Homo sapiens (Human) OX=9606 GN=ASCC3 PE=1 SV=3	ASCC3	0.002	327.292	35	67	137	67	2202	251.3
High	Q9Y4D8	Probable E3 ubiquitin-protein ligase HECTD4 OS=Homo sapiens (Human) OX=9606 GN=HECTD4 PE=1 SV=5	HECTD4	0.002	323.286	22	67	115	67	3996	439.1
High	Q9Y4G6	Talin-2 OS=Homo sapiens (Human) OX=9606 GN=TLN2 PE=1 SV=4	TLN2	0.002	313.496	34	67	139	67	2542	271.4
High	P35556	Fibrillin-2 OS=Homo sapiens (Human) OX=9606 GN=FBN2 PE=1 SV=3	FBN2	0.002	308.914	37	67	126	67	2912	314.6
High	O75376	Nuclear receptor corepressor 1 OS=Homo sapiens (Human) OX=9606 GN=NCOR1 PE=1 SV=2	NCOR1	0.001	244.449	39	67	106	67	2440	270
High	P49321	Nuclear autoantigenic sperm protein OS=Homo sapiens (Human) OX=9606 GN=NASP PE=1 SV=2	NASP	0.071	1173.96	86	66	1043	66	788	85.2
High	P55072	Transitional endoplasmic reticulum ATPase OS=Homo sapiens (Human) OX=9606 GN=VCP PE=1 SV=4	VCP	0.025	782.943	80	66	807	66	806	89.3
High	P04264	Keratin, type II cytoskeletal 1 OS=Homo sapiens (Human) OX=9606 GN=KRT1 PE=1 SV=6	KRT1	0.019	690.638	81	66	920	66	644	66
High	Q9P2J5	Leucine--tRNA ligase, cytoplasmic OS=Homo sapiens (Human) OX=9606 GN=LARS1 PE=1 SV=2	LARS1	0.008	535.943	60	66	312	66	1176	134.4
High	Q14203	Dynactin subunit 1 OS=Homo sapiens (Human) OX=9606 GN=DCTN1 PE=1 SV=3	DCTN1	0.006	498.571	57	66	235	66	1278	141.6
High	Q96N67	Dedicator of cytokinesis protein 7 OS=Homo sapiens (Human) OX=9606 GN=DOCK7 PE=1 SV=4	DOCK7	0.005	454.398	37	66	212	66	2140	242.4
High	Q9UPY3	Endoribonuclease Dicer OS=Homo sapiens (Human) OX=9606 GN=DICER1 PE=1 SV=3	DICER1	0.004	407.446	43	66	158	66	1922	218.5
High	A2RRP1	Neuroblastoma-amplified sequence OS=Homo sapiens (Human) OX=9606 GN=NBAS PE=1 SV=2	NBAS	0.004	406.504	33	66	164	66	2371	268.4
High	Q13428	Treacle protein OS=Homo sapiens (Human) OX=9606 GN=TCOF1 PE=1 SV=3	TCOF1	0.003	391.494	52	66	218	66	1488	152
High	Q9UM54	Unconventional myosin-VI OS=Homo sapiens (Human) OX=9606 GN=MYO6 PE=1 SV=4	MYO6	0.003	389.772	53	66	183	66	1294	149.6
High	Q96AY4	Tetratricopeptide repeat protein 28 OS=Homo sapiens (Human) OX=9606 GN=TTC28 PE=1 SV=4	TTC28	0.003	377.467	35	66	142	66	2481	270.7
High	Q9HCK8	Chromodomain-helicase-DNA-binding protein 8 OS=Homo sapiens (Human) OX=9606 GN=CHD8 PE=1 SV=5	CHD8	0.003	347.138	35	66	125	66	2581	290.3
High	Q8IWJ2	GRIP and coiled-coil domain-containing protein 2 OS=Homo sapiens (Human) OX=9606 GN=GCC2 PE=1 SV=4	GCC2	0.002	284.383	38	66	126	66	1684	195.8
High	Q15643	Thyroid receptor-interacting protein 11 OS=Homo sapiens (Human) OX=9606 GN=TRIP11 PE=1 SV=3	TRIP11	0.001	243.721	34	66	108	66	1979	227.4
High	P51587	Breast cancer type 2 susceptibility protein OS=Homo sapiens (Human) OX=9606 GN=BRCA2 PE=1 SV=3	BRCA2	0.001	230.566	22	66	90	66	3418	384
High	P34932	Heat shock 70 kDa protein 4 OS=Homo sapiens (Human) OX=9606 GN=HSPA4 PE=1 SV=4	HSPA4	0.02	703.541	78	65	539	65	840	94.3
High	Q93009	Ubiquitin carboxyl-terminal hydrolase 7 OS=Homo sapiens (Human) OX=9606 GN=USP7 PE=1 SV=2	USP7	0.009	553.483	61	65	266	65	1102	128.2
High	Q13459	Unconventional myosin-IXb OS=Homo sapiens (Human) OX=9606 GN=MYO9B PE=1 SV=3	MYO9B	0.003	366.29	35	65	140	65	2157	243.2
High	Q9H583	HEAT repeat-containing protein 1 OS=Homo sapiens (Human) OX=9606 GN=HEATR1 PE=1 SV=3	HEATR1	0.003	360.168	33	65	171	65	2144	242.2
High	Q8NI27	THO complex subunit 2 OS=Homo sapiens (Human) OX=9606 GN=THOC2 PE=1 SV=2	THOC2	0.003	355.75	39	65	174	65	1593	182.7
High	Q8TDJ6	DmX-like protein 2 OS=Homo sapiens (Human) OX=9606 GN=DMXL2 PE=1 SV=2	DMXL2	0.002	329.418	26	65	112	65	3036	339.4
High	Q96RL7	Vacuolar protein sorting-associated protein 13A OS=Homo sapiens (Human) OX=9606 GN=VPS13A PE=1 SV=2	VPS13A	0.002	306.047	25	65	119	65	3174	360
High	Q2LD37	Transmembrane protein KIAA1109 OS=Homo sapiens (Human) OX=9606 GN=KIAA1109 PE=1 SV=2	KIAA1109	0.001	217.891	18	65	91	65	5005	555.1
High	P19174	1-phosphatidylinositol 4,5-bisphosphate phosphodiesterase gamma-1 OS=Homo sapiens (Human) OX=9606 GN=PLCG1 PE=1 SV=1	PLCG1	0.007	515.24	51	64	269	64	1290	148.4
High	Q9BQG0	Myb-binding protein 1A OS=Homo sapiens (Human) OX=9606 GN=MYBBP1A PE=1 SV=2	MYBBP1A	0.007	499.767	49	64	208	64	1328	148.8
High	O00468	Agrin OS=Homo sapiens (Human) OX=9606 GN=AGRN PE=1 SV=6	AGRN	0.005	455.311	47	64	181	64	2068	217.2
High	Q9C091	GREB1-like protein OS=Homo sapiens (Human) OX=9606 GN=GREB1L PE=1 SV=2	GREB1L	0.003	365.994	42	64	163	64	1923	214.2
High	Q07864	DNA polymerase epsilon catalytic subunit A OS=Homo sapiens (Human) OX=9606 GN=POLE PE=1 SV=5	POLE	0.003	361.03	38	64	136	64	2286	261.4
High	Q69YN4	Protein virilizer homolog OS=Homo sapiens (Human) OX=9606 GN=VIRMA PE=1 SV=2	VIRMA	0.003	355.136	44	64	141	64	1812	201.9
High	Q92576	PHD finger protein 3 OS=Homo sapiens (Human) OX=9606 GN=PHF3 PE=1 SV=3	PHF3	0.003	353.04	38	64	130	64	2039	229.3
High	O95602	DNA-directed RNA polymerase I subunit RPA1 OS=Homo sapiens (Human) OX=9606 GN=POLR1A PE=1 SV=2	POLR1A	0.002	344.128	47	64	131	64	1720	194.7
High	Q96L91	E1A-binding protein p400 OS=Homo sapiens (Human) OX=9606 GN=EP400 PE=1 SV=4	EP400	0.002	324.16	30	64	142	64	3159	343.3
High	Q02224	Centromere-associated protein E OS=Homo sapiens (Human) OX=9606 GN=CENPE PE=1 SV=2	CENPE	0.001	224.55	23	64	96	64	2701	316.2
High	P13639	Elongation factor 2 OS=Homo sapiens (Human) OX=9606 GN=EEF2 PE=1 SV=4	EEF2	0.02	711.95	69	63	1067	63	858	95.3
High	Q9Y5B9	FACT complex subunit SPT16 OS=Homo sapiens (Human) OX=9606 GN=SUPT16H PE=1 SV=1	SUPT16H	0.014	632.066	56	63	478	63	1047	119.8
High	P27816	Microtubule-associated protein 4 OS=Homo sapiens (Human) OX=9606 GN=MAP4 PE=1 SV=3	MAP4	0.006	494.309	69	63	257	63	1152	120.9
High	Q96T23	Remodeling and spacing factor 1 OS=Homo sapiens (Human) OX=9606 GN=RSF1 PE=1 SV=2	RSF1	0.005	450.03	50	63	213	63	1441	163.7
High	Q92538	Golgi-specific brefeldin A-resistance guanine nucleotide exchange factor 1 OS=Homo sapiens (Human) OX=9606 GN=GBF1 PE=1 SV=2	GBF1	0.005	445.823	42	63	179	63	1859	206.3
High	O96028	Histone-lysine N-methyltransferase NSD2 OS=Homo sapiens (Human) OX=9606 GN=NSD2 PE=1 SV=1	NSD2	0.003	366.934	47	63	172	63	1365	152.2
High	P13611	Versican core protein OS=Homo sapiens (Human) OX=9606 GN=VCAN PE=1 SV=3	VCAN	0.003	358.725	23	63	209	63	3396	372.6
High	Q5JSZ5	Protein PRRC2B OS=Homo sapiens (Human) OX=9606 GN=PRRC2B PE=1 SV=2	PRRC2B	0.002	346.376	34	63	132	63	2229	242.8
High	Q8N201	Integrator complex subunit 1 OS=Homo sapiens (Human) OX=9606 GN=INTS1 PE=1 SV=2	INTS1	0.002	329.425	40	63	132	63	2190	244.1
High	P11532	Dystrophin OS=Homo sapiens (Human) OX=9606 GN=DMD PE=1 SV=3	DMD	0.001	243.667	18	63	108	63	3685	426.5
High	O15078	Centrosomal protein of 290 kDa OS=Homo sapiens (Human) OX=9606 GN=CEP290 PE=1 SV=2	CEP290	0.001	227.208	24	63	105	63	2479	290.2
High	Q9NTI5	Sister chromatid cohesion protein PDS5 homolog B OS=Homo sapiens (Human) OX=9606 GN=PDS5B PE=1 SV=1	PDS5B	0.005	471.127	43	62	233	62	1447	164.6
High	Q9NRY4	Rho GTPase-activating protein 35 OS=Homo sapiens (Human) OX=9606 GN=ARHGAP35 PE=1 SV=3	ARHGAP35	0.004	418.194	48	62	197	62	1499	170.4
High	P42345	Serine/threonine-protein kinase mTOR OS=Homo sapiens (Human) OX=9606 GN=MTOR PE=1 SV=1	MTOR	0.003	351.328	29	62	134	62	2549	288.7
High	Q6N022	Teneurin-4 OS=Homo sapiens (Human) OX=9606 GN=TENM4 PE=1 SV=2	TENM4	0.002	279.787	29	62	130	62	2769	307.8
High	Q7Z333	Probable helicase senataxin OS=Homo sapiens (Human) OX=9606 GN=SETX PE=1 SV=4	SETX	0.001	253.446	29	62	102	62	2677	302.7
High	Q12955	Ankyrin-3 OS=Homo sapiens (Human) OX=9606 GN=ANK3 PE=1 SV=3	ANK3	0.001	237.483	19	62	121	62	4377	480.1
High	Q14517	Protocadherin Fat 1 OS=Homo sapiens (Human) OX=9606 GN=FAT1 PE=1 SV=2	FAT1	0.001	229.437	16	62	92	62	4588	506
High	Q8IZT6	Abnormal spindle-like microcephaly-associated protein OS=Homo sapiens (Human) OX=9606 GN=ASPM PE=1 SV=2	ASPM	0.001	228.715	17	62	98	62	3477	409.5
High	Q8NEZ4	Histone-lysine N-methyltransferase 2C OS=Homo sapiens (Human) OX=9606 GN=KMT2C PE=1 SV=3	KMT2C	0.001	218.987	21	62	101	62	4911	541
High	Q9BV73	Centrosome-associated protein CEP250 OS=Homo sapiens (Human) OX=9606 GN=CEP250 PE=1 SV=2	CEP250	0.001	209.624	28	62	86	62	2442	281
High	Q92598	Heat shock protein 105 kDa OS=Homo sapiens (Human) OX=9606 GN=HSPH1 PE=1 SV=1	HSPH1	0.013	624.735	67	61	349	61	858	96.8
High	P26640	Valine--tRNA ligase OS=Homo sapiens (Human) OX=9606 GN=VARS1 PE=1 SV=4	VARS1	0.007	504.468	56	61	309	61	1264	140.4
High	Q8IX01	SURP and G-patch domain-containing protein 2 OS=Homo sapiens (Human) OX=9606 GN=SUGP2 PE=1 SV=2	SUGP2	0.005	458.385	71	61	175	61	1082	120.1
High	O75179	Ankyrin repeat domain-containing protein 17 OS=Homo sapiens (Human) OX=9606 GN=ANKRD17 PE=1 SV=3	ANKRD17	0.002	334.534	36	61	147	61	2603	274.1
High	Q9NRL2	Bromodomain adjacent to zinc finger domain protein 1A OS=Homo sapiens (Human) OX=9606 GN=BAZ1A PE=1 SV=2	BAZ1A	0.002	327.019	43	61	125	61	1556	178.6
High	Q13464	Rho-associated protein kinase 1 OS=Homo sapiens (Human) OX=9606 GN=ROCK1 PE=1 SV=1	ROCK1	0.002	322.21	42	61	138	61	1354	158.1
High	O75116	Rho-associated protein kinase 2 OS=Homo sapiens (Human) OX=9606 GN=ROCK2 PE=1 SV=4	ROCK2	0.002	311.837	46	61	131	61	1388	160.8
High	Q9ULT8	E3 ubiquitin-protein ligase HECTD1 OS=Homo sapiens (Human) OX=9606 GN=HECTD1 PE=1 SV=3	HECTD1	0.002	310.618	26	61	134	61	2610	289.2
High	O43149	Zinc finger ZZ-type and EF-hand domain-containing protein 1 OS=Homo sapiens (Human) OX=9606 GN=ZZEF1 PE=1 SV=6	ZZEF1	0.002	305.395	27	61	108	61	2961	330.9
High	Q15746	Myosin light chain kinase, smooth muscle OS=Homo sapiens (Human) OX=9606 GN=MYLK PE=1 SV=4	MYLK	0.002	288.585	39	61	127	61	1914	210.6
High	O95359	Transforming acidic coiled-coil-containing protein 2 OS=Homo sapiens (Human) OX=9606 GN=TACC2 PE=1 SV=3	TACC2	0.001	254.421	31	61	107	61	2948	309.2
High	Q8N163	Cell cycle and apoptosis regulator protein 2 OS=Homo sapiens (Human) OX=9606 GN=CCAR2 PE=1 SV=2	CCAR2	0.014	635.247	68	60	356	60	923	102.8
High	P52701	DNA mismatch repair protein Msh6 OS=Homo sapiens (Human) OX=9606 GN=MSH6 PE=1 SV=2	MSH6	0.008	520.791	50	60	347	60	1360	152.7
High	Q7L014	Probable ATP-dependent RNA helicase DDX46 OS=Homo sapiens (Human) OX=9606 GN=DDX46 PE=1 SV=2	DDX46	0.005	450.229	56	60	228	60	1031	117.3
High	O60264	SWI/SNF-related matrix-associated actin-dependent regulator of chromatin subfamily A member 5 OS=Homo sapiens (Human) OX=9606 GN=SMARCA5 PE=1 SV=1	SMARCA5	0.005	443.472	47	60	352	60	1052	121.8
High	P10586	Receptor-type tyrosine-protein phosphatase F OS=Homo sapiens (Human) OX=9606 GN=PTPRF PE=1 SV=2	PTPRF	0.004	420.306	43	60	162	60	1907	212.7
High	Q7L2E3	ATP-dependent RNA helicase DHX30 OS=Homo sapiens (Human) OX=9606 GN=DHX30 PE=1 SV=1	DHX30	0.003	392.215	54	60	173	60	1194	133.9
High	Q86YZ3	Hornerin OS=Homo sapiens (Human) OX=9606 GN=HRNR PE=1 SV=2	HRNR	0.003	382.369	66	60	237	60	2850	282.2
High	Q8TEQ6	Gem-associated protein 5 OS=Homo sapiens (Human) OX=9606 GN=GEMIN5 PE=1 SV=3	GEMIN5	0.003	372.351	43	60	173	60	1508	168.5
High	O60271	C-Jun-amino-terminal kinase-interacting protein 4 OS=Homo sapiens (Human) OX=9606 GN=SPAG9 PE=1 SV=4	SPAG9	0.002	338.282	53	60	142	60	1321	146.1
High	Q5SW79	Centrosomal protein of 170 kDa OS=Homo sapiens (Human) OX=9606 GN=CEP170 PE=1 SV=1	CEP170	0.002	327.669	46	60	151	60	1584	175.2
High	P11047	Laminin subunit gamma-1 OS=Homo sapiens (Human) OX=9606 GN=LAMC1 PE=1 SV=3	LAMC1	0.002	324.347	46	60	119	60	1609	177.5
High	Q7RTP6	[F-actin]-monooxygenase MICAL3 OS=Homo sapiens (Human) OX=9606 GN=MICAL3 PE=1 SV=2	MICAL3	0.002	268.896	39	60	94	60	2002	224.2
High	Q9BY89	Uncharacterized protein KIAA1671 OS=Homo sapiens (Human) OX=9606 GN=KIAA1671 PE=1 SV=2	KIAA1671	0.001	255.93	42	60	92	60	1806	196.6
High	Q9Y618	Nuclear receptor corepressor 2 OS=Homo sapiens (Human) OX=9606 GN=NCOR2 PE=1 SV=3	NCOR2	0.001	239.493	37	60	97	60	2514	273.5
High	P78347	General transcription factor II-I OS=Homo sapiens (Human) OX=9606 GN=GTF2I PE=1 SV=2	GTF2I	0.009	548.95	63	59	419	59	998	112.3
High	P33176	Kinesin-1 heavy chain OS=Homo sapiens (Human) OX=9606 GN=KIF5B PE=1 SV=1	KIF5B	0.006	488.198	63	59	247	59	963	109.6
High	O60841	Eukaryotic translation initiation factor 5B OS=Homo sapiens (Human) OX=9606 GN=EIF5B PE=1 SV=4	EIF5B	0.003	393.9	45	59	198	59	1220	138.7
High	Q29RF7	Sister chromatid cohesion protein PDS5 homolog A OS=Homo sapiens (Human) OX=9606 GN=PDS5A PE=1 SV=1	PDS5A	0.003	382.82	47	59	152	59	1337	150.7
High	Q14160	Protein scribble homolog OS=Homo sapiens (Human) OX=9606 GN=SCRIB PE=1 SV=4	SCRIB	0.003	362.221	51	59	143	59	1630	174.8
High	P35573	Glycogen debranching enzyme OS=Homo sapiens (Human) OX=9606 GN=AGL PE=1 SV=3	AGL	0.002	345.425	46	59	163	59	1532	174.7
High	Q6ZRS2	Helicase SRCAP OS=Homo sapiens (Human) OX=9606 GN=SRCAP PE=1 SV=3	SRCAP	0.002	332.074	29	59	121	59	3230	343.3
High	O15031	Plexin-B2 OS=Homo sapiens (Human) OX=9606 GN=PLXNB2 PE=1 SV=3	PLXNB2	0.002	320.283	43	59	127	59	1838	205
High	Q12756	Kinesin-like protein KIF1A OS=Homo sapiens (Human) OX=9606 GN=KIF1A PE=1 SV=2	KIF1A	0.002	304.151	40	59	118	59	1690	190.9
High	Q93074	Mediator of RNA polymerase II transcription subunit 12 OS=Homo sapiens (Human) OX=9606 GN=MED12 PE=1 SV=4	MED12	0.002	268.416	33	59	103	59	2177	242.9
High	Q9UK61	Protein TASOR OS=Homo sapiens (Human) OX=9606 GN=TASOR PE=1 SV=3	TASOR	0.001	265.158	41	59	100	59	1670	188.9
High	Q8TEW0	Partitioning defective 3 homolog OS=Homo sapiens (Human) OX=9606 GN=PARD3 PE=1 SV=2	PARD3	0.001	263.313	47	59	120	59	1356	151.3
High	O75962	Triple functional domain protein OS=Homo sapiens (Human) OX=9606 GN=TRIO PE=1 SV=2	TRIO	0.001	250.997	24	59	87	59	3097	346.7
High	P25054	Adenomatous polyposis coli protein OS=Homo sapiens (Human) OX=9606 GN=APC PE=1 SV=2	APC	0.001	236.702	29	59	106	59	2843	311.5
High	Q12906	Interleukin enhancer-binding factor 3 OS=Homo sapiens (Human) OX=9606 GN=ILF3 PE=1 SV=3	ILF3	0.024	772.745	75	58	854	58	894	95.3
High	P53396	ATP-citrate synthase OS=Homo sapiens (Human) OX=9606 GN=ACLY PE=1 SV=3	ACLY	0.014	632.718	58	58	478	58	1101	120.8
High	O43707	Alpha-actinin-4 OS=Homo sapiens (Human) OX=9606 GN=ACTN4 PE=1 SV=2	ACTN4	0.013	615.488	66	58	563	58	911	104.8
High	Q9C0C9	(E3-independent) E2 ubiquitin-conjugating enzyme OS=Homo sapiens (Human) OX=9606 GN=UBE2O PE=1 SV=3	UBE2O	0.007	507.695	52	58	235	58	1292	141.2
High	P29144	Tripeptidyl-peptidase 2 OS=Homo sapiens (Human) OX=9606 GN=TPP2 PE=1 SV=4	TPP2	0.007	503.986	49	58	240	58	1249	138.3
High	P09884	DNA polymerase alpha catalytic subunit OS=Homo sapiens (Human) OX=9606 GN=POLA1 PE=1 SV=2	POLA1	0.005	445.322	45	58	189	58	1462	165.8
High	Q5VZL5	Zinc finger MYM-type protein 4 OS=Homo sapiens (Human) OX=9606 GN=ZMYM4 PE=1 SV=1	ZMYM4	0.003	371.706	44	58	165	58	1548	172.7
High	Q96K76	Ubiquitin carboxyl-terminal hydrolase 47 OS=Homo sapiens (Human) OX=9606 GN=USP47 PE=1 SV=3	USP47	0.003	363.027	50	58	141	58	1375	157.2
High	Q14669	E3 ubiquitin-protein ligase TRIP12 OS=Homo sapiens (Human) OX=9606 GN=TRIP12 PE=1 SV=1	TRIP12	0.002	343.142	37	58	127	58	1992	220.3
High	P49815	Tuberin OS=Homo sapiens (Human) OX=9606 GN=TSC2 PE=1 SV=2	TSC2	0.002	335.406	40	58	159	58	1807	200.5
High	O43432	Eukaryotic translation initiation factor 4 gamma 3 OS=Homo sapiens (Human) OX=9606 GN=EIF4G3 PE=1 SV=2	EIF4G3	0.002	308.234	39	58	138	58	1585	176.5
High	Q5TAX3	Terminal uridylyltransferase 4 OS=Homo sapiens (Human) OX=9606 GN=TUT4 PE=1 SV=3	TUT4	0.002	298.973	37	58	131	58	1644	185
High	Q14185	Dedicator of cytokinesis protein 1 OS=Homo sapiens (Human) OX=9606 GN=DOCK1 PE=1 SV=2	DOCK1	0.002	292.774	33	58	114	58	1865	215.2
High	Q9Y4L1	Hypoxia up-regulated protein 1 OS=Homo sapiens (Human) OX=9606 GN=HYOU1 PE=1 SV=1	HYOU1	0.012	607.733	58	57	445	57	999	111.3
High	Q13200	26S proteasome non-ATPase regulatory subunit 2 OS=Homo sapiens (Human) OX=9606 GN=PSMD2 PE=1 SV=3	PSMD2	0.008	523.462	66	57	361	57	908	100.1
High	P26038	Moesin OS=Homo sapiens (Human) OX=9606 GN=MSN PE=1 SV=3	MSN	0.007	511.404	66	57	477	57	577	67.8
High	P41252	Isoleucine--tRNA ligase, cytoplasmic OS=Homo sapiens (Human) OX=9606 GN=IARS1 PE=1 SV=2	IARS1	0.007	505.982	50	57	323	57	1262	144.4
High	P33992	DNA replication licensing factor MCM5 OS=Homo sapiens (Human) OX=9606 GN=MCM5 PE=1 SV=5	MCM5	0.007	505.359	67	57	408	57	734	82.2
High	Q9Y2W1	Thyroid hormone receptor-associated protein 3 OS=Homo sapiens (Human) OX=9606 GN=THRAP3 PE=1 SV=2	THRAP3	0.004	415.874	45	57	289	57	955	108.6
High	O75717	WD repeat and HMG-box DNA-binding protein 1 OS=Homo sapiens (Human) OX=9606 GN=WDHD1 PE=1 SV=1	WDHD1	0.004	414.7	61	57	182	57	1129	125.9
High	Q9C0C2	182 kDa tankyrase-1-binding protein OS=Homo sapiens (Human) OX=9606 GN=TNKS1BP1 PE=1 SV=4	TNKS1BP1	0.003	397.836	50	57	134	57	1729	181.7
High	O75150	E3 ubiquitin-protein ligase BRE1B OS=Homo sapiens (Human) OX=9606 GN=RNF40 PE=1 SV=5	RNF40	0.003	373.569	53	57	151	57	1001	113.6
High	Q96ST3	Paired amphipathic helix protein Sin3a OS=Homo sapiens (Human) OX=9606 GN=SIN3A PE=1 SV=2	SIN3A	0.003	358.778	51	57	173	57	1273	145.1
High	Q9BUQ8	Probable ATP-dependent RNA helicase DDX23 OS=Homo sapiens (Human) OX=9606 GN=DDX23 PE=1 SV=3	DDX23	0.002	340.743	60	57	206	57	820	95.5
High	Q5VYK3	Proteasome adapter and scaffold protein ECM29 OS=Homo sapiens (Human) OX=9606 GN=ECPAS PE=1 SV=2	ECPAS	0.002	339.467	36	57	166	57	1845	204.2
High	Q9Y5S2	Serine/threonine-protein kinase MRCK beta OS=Homo sapiens (Human) OX=9606 GN=CDC42BPB PE=1 SV=2	CDC42BPB	0.002	330.236	38	57	164	57	1711	194.2
High	P55268	Laminin subunit beta-2 OS=Homo sapiens (Human) OX=9606 GN=LAMB2 PE=1 SV=2	LAMB2	0.002	329.636	47	57	129	57	1798	195.9
High	Q8NFD5	AT-rich interactive domain-containing protein 1B OS=Homo sapiens (Human) OX=9606 GN=ARID1B PE=1 SV=2	ARID1B	0.002	282.061	35	57	109	57	2236	236
High	Q9UGU0	Transcription factor 20 OS=Homo sapiens (Human) OX=9606 GN=TCF20 PE=1 SV=3	TCF20	0.001	253.324	43	57	102	57	1960	211.6
High	P30622	CAP-Gly domain-containing linker protein 1 OS=Homo sapiens (Human) OX=9606 GN=CLIP1 PE=1 SV=2	CLIP1	0.001	246.647	42	57	103	57	1438	162.1
High	Q9NSI6	Bromodomain and WD repeat-containing protein 1 OS=Homo sapiens (Human) OX=9606 GN=BRWD1 PE=1 SV=4	BRWD1	0.001	175.067	32	57	71	57	2320	262.8
High	P22314	Ubiquitin-like modifier-activating enzyme 1 OS=Homo sapiens (Human) OX=9606 GN=UBA1 PE=1 SV=3	UBA1	0.013	625.905	65	56	451	56	1058	117.8
High	Q92922	SWI/SNF complex subunit SMARCC1 OS=Homo sapiens (Human) OX=9606 GN=SMARCC1 PE=1 SV=3	SMARCC1	0.012	601.217	50	56	341	56	1105	122.8
High	P20700	Lamin-B1 OS=Homo sapiens (Human) OX=9606 GN=LMNB1 PE=1 SV=2	LMNB1	0.012	593.615	70	56	494	56	586	66.4
High	P33993	DNA replication licensing factor MCM7 OS=Homo sapiens (Human) OX=9606 GN=MCM7 PE=1 SV=4	MCM7	0.009	547.906	76	56	372	56	719	81.3
High	Q13435	Splicing factor 3B subunit 2 OS=Homo sapiens (Human) OX=9606 GN=SF3B2 PE=1 SV=2	SF3B2	0.008	532.956	56	56	317	56	895	100.2
High	Q86VP6	Cullin-associated NEDD8-dissociated protein 1 OS=Homo sapiens (Human) OX=9606 GN=CAND1 PE=1 SV=2	CAND1	0.007	518.025	52	56	403	56	1230	136.3
High	Q16531	DNA damage-binding protein 1 OS=Homo sapiens (Human) OX=9606 GN=DDB1 PE=1 SV=1	DDB1	0.004	405.49	52	56	325	56	1140	126.9
High	O43795	Unconventional myosin-Ib OS=Homo sapiens (Human) OX=9606 GN=MYO1B PE=1 SV=3	MYO1B	0.002	345.655	48	56	168	56	1136	131.9
High	Q4KWH8	1-phosphatidylinositol 4,5-bisphosphate phosphodiesterase eta-1 OS=Homo sapiens (Human) OX=9606 GN=PLCH1 PE=1 SV=1	PLCH1	0.002	267.577	33	56	148	56	1693	189.1
High	Q96Q89	Kinesin-like protein KIF20B OS=Homo sapiens (Human) OX=9606 GN=KIF20B PE=1 SV=3	KIF20B	0.001	247.792	35	56	181	56	1820	210.5
High	O60281	Zinc finger protein 292 OS=Homo sapiens (Human) OX=9606 GN=ZNF292 PE=1 SV=3	ZNF292	0.001	242.992	28	56	92	56	2723	304.6
High	Q86XX4	Extracellular matrix protein FRAS1 OS=Homo sapiens (Human) OX=9606 GN=FRAS1 PE=1 SV=2	FRAS1	0.001	219.422	21	56	78	56	4008	442.9
High	P08238	Heat shock protein HSP 90-beta OS=Homo sapiens (Human) OX=9606 GN=HSP90AB1 PE=1 SV=4	HSP90AB1	0.033	872.572	64	55	2182	55	724	83.2
High	P14618	Pyruvate kinase PKM OS=Homo sapiens (Human) OX=9606 GN=PKM PE=1 SV=4	PKM	0.019	691.237	81	55	1409	55	531	57.9
High	Q15029	116 kDa U5 small nuclear ribonucleoprotein component OS=Homo sapiens (Human) OX=9606 GN=EFTUD2 PE=1 SV=1	EFTUD2	0.007	516.944	75	55	402	55	972	109.4
High	P25205	DNA replication licensing factor MCM3 OS=Homo sapiens (Human) OX=9606 GN=MCM3 PE=1 SV=3	MCM3	0.006	479.11	75	55	369	55	808	90.9
High	Q8TEM1	Nuclear pore membrane glycoprotein 210 OS=Homo sapiens (Human) OX=9606 GN=NUP210 PE=1 SV=3	NUP210	0.005	462.973	35	55	244	55	1887	205
High	O94906	Pre-mRNA-processing factor 6 OS=Homo sapiens (Human) OX=9606 GN=PRPF6 PE=1 SV=1	PRPF6	0.004	437.413	58	55	213	55	941	106.9
High	P51610	Host cell factor 1 OS=Homo sapiens (Human) OX=9606 GN=HCFC1 PE=1 SV=2	HCFC1	0.004	430.043	40	55	232	55	2035	208.6
High	O60716	Catenin delta-1 OS=Homo sapiens (Human) OX=9606 GN=CTNND1 PE=1 SV=1	CTNND1	0.004	412.541	59	55	233	55	968	108.1
High	P18583	Protein SON OS=Homo sapiens (Human) OX=9606 GN=SON PE=1 SV=4	SON	0.003	374.627	28	55	203	55	2426	263.7
High	O95819	Mitogen-activated protein kinase kinase kinase kinase 4 OS=Homo sapiens (Human) OX=9606 GN=MAP4K4 PE=1 SV=2	MAP4K4	0.003	362.169	47	55	139	55	1239	142
High	P35658	Nuclear pore complex protein Nup214 OS=Homo sapiens (Human) OX=9606 GN=NUP214 PE=1 SV=2	NUP214	0.003	355.703	33	55	158	55	2090	213.5
High	Q9H2G2	STE20-like serine/threonine-protein kinase OS=Homo sapiens (Human) OX=9606 GN=SLK PE=1 SV=1	SLK	0.002	330.974	47	55	134	55	1235	142.6
High	Q9NVI1	Fanconi anemia group I protein OS=Homo sapiens (Human) OX=9606 GN=FANCI PE=1 SV=4	FANCI	0.002	319.926	44	55	140	55	1328	149.2
High	Q641Q2	WASH complex subunit 2A OS=Homo sapiens (Human) OX=9606 GN=WASHC2A PE=1 SV=3	WASHC2A	0.001	265.733	50	55	103	55	1341	147.1
High	P42356	Phosphatidylinositol 4-kinase alpha OS=Homo sapiens (Human) OX=9606 GN=PI4KA PE=1 SV=4	PI4KA	0.001	248.8	33	55	108	55	2102	236.7
High	Q5THJ4	Vacuolar protein sorting-associated protein 13D OS=Homo sapiens (Human) OX=9606 GN=VPS13D PE=1 SV=2	VPS13D	0.001	190.854	16	55	76	55	4388	491.6
High	P52272	Heterogeneous nuclear ribonucleoprotein M OS=Homo sapiens (Human) OX=9606 GN=HNRNPM PE=1 SV=3	HNRNPM	0.028	802.777	69	54	850	54	730	77.5
High	Q15393	Splicing factor 3B subunit 3 OS=Homo sapiens (Human) OX=9606 GN=SF3B3 PE=1 SV=4	SF3B3	0.007	503.793	50	54	412	54	1217	135.5
High	Q92900	Regulator of nonsense transcripts 1 OS=Homo sapiens (Human) OX=9606 GN=UPF1 PE=1 SV=2	UPF1	0.006	483.994	57	54	277	54	1129	124.3
High	Q9BXJ9	N-alpha-acetyltransferase 15, NatA auxiliary subunit OS=Homo sapiens (Human) OX=9606 GN=NAA15 PE=1 SV=1	NAA15	0.003	376.025	54	54	233	54	866	101.2
High	Q7L576	Cytoplasmic FMR1-interacting protein 1 OS=Homo sapiens (Human) OX=9606 GN=CYFIP1 PE=1 SV=1	CYFIP1	0.003	375.933	49	54	181	54	1253	145.1
High	Q96JM3	Chromosome alignment-maintaining phosphoprotein 1 OS=Homo sapiens (Human) OX=9606 GN=CHAMP1 PE=1 SV=2	CHAMP1	0.003	359.257	70	54	161	54	812	89
High	Q7Z4S6	Kinesin-like protein KIF21A OS=Homo sapiens (Human) OX=9606 GN=KIF21A PE=1 SV=2	KIF21A	0.002	315.218	40	54	125	54	1674	187.1
High	Q9H6S0	3'-5' RNA helicase YTHDC2 OS=Homo sapiens (Human) OX=9606 GN=YTHDC2 PE=1 SV=2	YTHDC2	0.002	281.706	44	54	113	54	1430	160.1
High	Q8IUD2	ELKS/Rab6-interacting/CAST family member 1 OS=Homo sapiens (Human) OX=9606 GN=ERC1 PE=1 SV=1	ERC1	0.002	274.213	47	54	108	54	1116	128
High	O14802	DNA-directed RNA polymerase III subunit RPC1 OS=Homo sapiens (Human) OX=9606 GN=POLR3A PE=1 SV=2	POLR3A	0.001	265.468	43	54	107	54	1390	155.5
High	Q96L73	Histone-lysine N-methyltransferase, H3 lysine-36 specific OS=Homo sapiens (Human) OX=9606 GN=NSD1 PE=1 SV=1	NSD1	0.001	243.274	30	54	83	54	2696	296.5
High	Q9HCU4	Cadherin EGF LAG seven-pass G-type receptor 2 OS=Homo sapiens (Human) OX=9606 GN=CELSR2 PE=1 SV=1	CELSR2	0.001	238.998	25	54	99	54	2923	317.3
High	Q96SN8	CDK5 regulatory subunit-associated protein 2 OS=Homo sapiens (Human) OX=9606 GN=CDK5RAP2 PE=1 SV=5	CDK5RAP2	0.001	235.731	32	54	98	54	1893	214.9
High	O15021	Microtubule-associated serine/threonine-protein kinase 4 OS=Homo sapiens (Human) OX=9606 GN=MAST4 PE=1 SV=4	MAST4	0.001	152.551	25	54	85	54	2623	283.9
High	Q00839	Heterogeneous nuclear ribonucleoprotein U OS=Homo sapiens (Human) OX=9606 GN=HNRNPU PE=1 SV=6	HNRNPU	0.017	667.589	53	53	811	53	825	90.5
High	Q9BSJ8	Extended synaptotagmin-1 OS=Homo sapiens (Human) OX=9606 GN=ESYT1 PE=1 SV=1	ESYT1	0.006	491.734	56	53	248	53	1104	122.8
High	Q7KZF4	Staphylococcal nuclease domain-containing protein 1 OS=Homo sapiens (Human) OX=9606 GN=SND1 PE=1 SV=1	SND1	0.005	473.005	61	53	400	53	910	101.9
High	P11586	C-1-tetrahydrofolate synthase, cytoplasmic OS=Homo sapiens (Human) OX=9606 GN=MTHFD1 PE=1 SV=3	MTHFD1	0.005	465.917	57	53	433	53	935	101.5
High	Q6PKG0	La-related protein 1 OS=Homo sapiens (Human) OX=9606 GN=LARP1 PE=1 SV=2	LARP1	0.005	459.903	58	53	216	53	1096	123.4
High	Q9H2P0	Activity-dependent neuroprotector homeobox protein OS=Homo sapiens (Human) OX=9606 GN=ADNP PE=1 SV=1	ADNP	0.004	417.03	50	53	227	53	1102	123.5
High	O43491	Band 4.1-like protein 2 OS=Homo sapiens (Human) OX=9606 GN=EPB41L2 PE=1 SV=1	EPB41L2	0.004	412.594	51	53	195	53	1005	112.5
High	P08133	Annexin A6 OS=Homo sapiens (Human) OX=9606 GN=ANXA6 PE=1 SV=3	ANXA6	0.004	405.432	70	53	242	53	673	75.8
High	P55265	Double-stranded RNA-specific adenosine deaminase OS=Homo sapiens (Human) OX=9606 GN=ADAR PE=1 SV=4	ADAR	0.003	380.376	52	53	209	53	1226	136
High	Q5JTH9	RRP12-like protein OS=Homo sapiens (Human) OX=9606 GN=RRP12 PE=1 SV=2	RRP12	0.003	365.101	47	53	180	53	1297	143.6
High	Q8N1F7	Nuclear pore complex protein Nup93 OS=Homo sapiens (Human) OX=9606 GN=NUP93 PE=1 SV=2	NUP93	0.003	353.953	62	53	197	53	819	93.4
High	Q6PGP7	Tetratricopeptide repeat protein 37 OS=Homo sapiens (Human) OX=9606 GN=TTC37 PE=1 SV=1	TTC37	0.002	337.434	35	53	173	53	1564	175.4
High	Q8WUM4	Programmed cell death 6-interacting protein OS=Homo sapiens (Human) OX=9606 GN=PDCD6IP PE=1 SV=1	PDCD6IP	0.002	314.196	62	53	201	53	868	96
High	P31327	Carbamoyl-phosphate synthase [ammonia], mitochondrial OS=Homo sapiens (Human) OX=9606 GN=CPS1 PE=1 SV=2	CPS1	0.002	296.621	48	53	119	53	1500	164.8
High	Q6P158	Putative ATP-dependent RNA helicase DHX57 OS=Homo sapiens (Human) OX=9606 GN=DHX57 PE=1 SV=2	DHX57	0.002	294.091	45	53	134	53	1386	155.5
High	O60610	Protein diaphanous homolog 1 OS=Homo sapiens (Human) OX=9606 GN=DIAPH1 PE=1 SV=2	DIAPH1	0.002	287.224	41	53	118	53	1272	141.3
High	Q8IY17	Patatin-like phospholipase domain-containing protein 6 OS=Homo sapiens (Human) OX=9606 GN=PNPLA6 PE=1 SV=3	PNPLA6	0.002	277.681	47	53	123	53	1375	150.9
High	O14974	Protein phosphatase 1 regulatory subunit 12A OS=Homo sapiens (Human) OX=9606 GN=PPP1R12A PE=1 SV=1	PPP1R12A	0.002	277.136	44	53	135	53	1030	115.2
High	Q9UIW2	Plexin-A1 OS=Homo sapiens (Human) OX=9606 GN=PLXNA1 PE=1 SV=3	PLXNA1	0.002	269.489	32	53	126	53	1896	210.9
High	Q5VUA4	Zinc finger protein 318 OS=Homo sapiens (Human) OX=9606 GN=ZNF318 PE=1 SV=2	ZNF318	0.001	211.222	27	53	86	53	2279	251
High	Q8TD26	Chromodomain-helicase-DNA-binding protein 6 OS=Homo sapiens (Human) OX=9606 GN=CHD6 PE=1 SV=4	CHD6	0.001	209.236	27	53	75	53	2715	305.2
High	Q15652	Probable JmjC domain-containing histone demethylation protein 2C OS=Homo sapiens (Human) OX=9606 GN=JMJD1C PE=1 SV=2	JMJD1C	0.001	188.972	27	53	82	53	2540	284.3
High	P14625	Endoplasmin OS=Homo sapiens (Human) OX=9606 GN=HSP90B1 PE=1 SV=1	HSP90B1	0.014	630.33	57	52	772	52	803	92.4
High	P55060	Exportin-2 OS=Homo sapiens (Human) OX=9606 GN=CSE1L PE=1 SV=3	CSE1L	0.006	476.287	49	52	421	52	971	110.3
High	Q9BXP5	Serrate RNA effector molecule homolog OS=Homo sapiens (Human) OX=9606 GN=SRRT PE=1 SV=1	SRRT	0.004	403.81	49	52	269	52	876	100.6
High	Q9UBW7	Zinc finger MYM-type protein 2 OS=Homo sapiens (Human) OX=9606 GN=ZMYM2 PE=1 SV=1	ZMYM2	0.003	396.706	46	52	176	52	1377	154.8
High	Q10570	Cleavage and polyadenylation specificity factor subunit 1 OS=Homo sapiens (Human) OX=9606 GN=CPSF1 PE=1 SV=2	CPSF1	0.002	339.364	47	52	176	52	1443	160.8
High	P52948	Nuclear pore complex protein Nup98-Nup96 OS=Homo sapiens (Human) OX=9606 GN=NUP98 PE=1 SV=4	NUP98	0.002	337.132	33	52	168	52	1817	197.5
High	Q7Z478	ATP-dependent RNA helicase DHX29 OS=Homo sapiens (Human) OX=9606 GN=DHX29 PE=1 SV=2	DHX29	0.002	285.254	47	52	106	52	1369	155.1
High	Q9ULU4	Protein kinase C-binding protein 1 OS=Homo sapiens (Human) OX=9606 GN=ZMYND8 PE=1 SV=2	ZMYND8	0.002	278.267	51	52	109	52	1186	131.6
High	Q86US8	Telomerase-binding protein EST1A OS=Homo sapiens (Human) OX=9606 GN=SMG6 PE=1 SV=2	SMG6	0.002	274.689	39	52	110	52	1419	160.4
High	O95239	Chromosome-associated kinesin KIF4A OS=Homo sapiens (Human) OX=9606 GN=KIF4A PE=1 SV=3	KIF4A	0.002	272.205	48	52	122	52	1232	139.8
High	Q9Y2I7	1-phosphatidylinositol 3-phosphate 5-kinase OS=Homo sapiens (Human) OX=9606 GN=PIKFYVE PE=1 SV=3	PIKFYVE	0.001	223.473	31	52	82	52	2098	237
High	Q3T8J9	GON-4-like protein OS=Homo sapiens (Human) OX=9606 GN=GON4L PE=1 SV=1	GON4L	0.001	220.62	34	52	76	52	2241	248.5
High	Q5THK1	Protein PRR14L OS=Homo sapiens (Human) OX=9606 GN=PRR14L PE=1 SV=1	PRR14L	0.001	193.55	29	52	86	52	2151	237.2
High	Q6V0I7	Protocadherin Fat 4 OS=Homo sapiens (Human) OX=9606 GN=FAT4 PE=1 SV=2	FAT4	0.001	156.307	18	52	72	52	4981	542.4
High	O14980	Exportin-1 OS=Homo sapiens (Human) OX=9606 GN=XPO1 PE=1 SV=1	XPO1	0.01	566.541	58	51	467	51	1071	123.3
High	P55786	Puromycin-sensitive aminopeptidase OS=Homo sapiens (Human) OX=9606 GN=NPEPPS PE=1 SV=2	NPEPPS	0.005	470.186	59	51	348	51	919	103.2
High	Q1KMD3	Heterogeneous nuclear ribonucleoprotein U-like protein 2 OS=Homo sapiens (Human) OX=9606 GN=HNRNPUL2 PE=1 SV=1	HNRNPUL2	0.005	462.648	69	51	305	51	747	85.1
High	P16615	Sarcoplasmic/endoplasmic reticulum calcium ATPase 2 OS=Homo sapiens (Human) OX=9606 GN=ATP2A2 PE=1 SV=1	ATP2A2	0.005	459.895	56	51	248	51	1042	114.7
High	P30876	DNA-directed RNA polymerase II subunit RPB2 OS=Homo sapiens (Human) OX=9606 GN=POLR2B PE=1 SV=1	POLR2B	0.005	451.604	46	51	226	51	1174	133.8
High	P49916	DNA ligase 3 OS=Homo sapiens (Human) OX=9606 GN=LIG3 PE=1 SV=2	LIG3	0.004	412.312	54	51	222	51	1009	112.8
High	O60313	Dynamin-like 120 kDa protein, mitochondrial OS=Homo sapiens (Human) OX=9606 GN=OPA1 PE=1 SV=3	OPA1	0.002	342	56	51	162	51	960	111.6
High	O60306	RNA helicase aquarius OS=Homo sapiens (Human) OX=9606 GN=AQR PE=1 SV=4	AQR	0.002	329.803	41	51	143	51	1485	171.2
High	Q92974	Rho guanine nucleotide exchange factor 2 OS=Homo sapiens (Human) OX=9606 GN=ARHGEF2 PE=1 SV=4	ARHGEF2	0.002	326.701	54	51	148	51	986	111.5
High	O14776	Transcription elongation regulator 1 OS=Homo sapiens (Human) OX=9606 GN=TCERG1 PE=1 SV=2	TCERG1	0.002	306.333	39	51	157	51	1098	123.8
High	Q92793	CREB-binding protein OS=Homo sapiens (Human) OX=9606 GN=CREBBP PE=1 SV=3	CREBBP	0.002	302.139	38	51	115	51	2442	265.2
High	Q9ULH0	Kinase D-interacting substrate of 220 kDa OS=Homo sapiens (Human) OX=9606 GN=KIDINS220 PE=1 SV=3	KIDINS220	0.002	292.651	35	51	111	51	1771	196.4
High	Q15075	Early endosome antigen 1 OS=Homo sapiens (Human) OX=9606 GN=EEA1 PE=1 SV=2	EEA1	0.001	245.727	39	51	98	51	1411	162.4
High	Q7Z6E9	E3 ubiquitin-protein ligase RBBP6 OS=Homo sapiens (Human) OX=9606 GN=RBBP6 PE=1 SV=1	RBBP6	0.001	227.795	29	51	116	51	1792	201.4
High	O60293	Zinc finger C3H1 domain-containing protein OS=Homo sapiens (Human) OX=9606 GN=ZFC3H1 PE=1 SV=3	ZFC3H1	0.001	215.825	31	51	83	51	1989	226.2
High	Q14697	Neutral alpha-glucosidase AB OS=Homo sapiens (Human) OX=9606 GN=GANAB PE=1 SV=3	GANAB	0.01	571.82	53	50	506	50	944	106.8
High	O00410	Importin-5 OS=Homo sapiens (Human) OX=9606 GN=IPO5 PE=1 SV=4	IPO5	0.008	528.541	54	50	352	50	1097	123.6
High	P43243	Matrin-3 OS=Homo sapiens (Human) OX=9606 GN=MATR3 PE=1 SV=2	MATR3	0.008	526.581	60	50	653	50	847	94.6
High	P22102	Trifunctional purine biosynthetic protein adenosine-3 OS=Homo sapiens (Human) OX=9606 GN=GART PE=1 SV=1	GART	0.006	485.148	56	50	321	50	1010	107.7
High	P43246	DNA mismatch repair protein Msh2 OS=Homo sapiens (Human) OX=9606 GN=MSH2 PE=1 SV=1	MSH2	0.005	461.499	66	50	288	50	934	104.7
High	Q92896	Golgi apparatus protein 1 OS=Homo sapiens (Human) OX=9606 GN=GLG1 PE=1 SV=2	GLG1	0.004	402.537	44	50	202	50	1179	134.5
High	Q14566	DNA replication licensing factor MCM6 OS=Homo sapiens (Human) OX=9606 GN=MCM6 PE=1 SV=1	MCM6	0.003	389.241	64	50	354	50	821	92.8
High	P19338	Nucleolin OS=Homo sapiens (Human) OX=9606 GN=NCL PE=1 SV=3	NCL	0.003	372.254	54	50	505	50	710	76.6
High	P11387	DNA topoisomerase 1 OS=Homo sapiens (Human) OX=9606 GN=TOP1 PE=1 SV=2	TOP1	0.003	359.897	54	50	223	50	765	90.7
High	Q01780	Exosome component 10 OS=Homo sapiens (Human) OX=9606 GN=EXOSC10 PE=1 SV=2	EXOSC10	0.002	335.436	63	50	159	50	885	100.8
High	Q9Y6D6	Brefeldin A-inhibited guanine nucleotide-exchange protein 1 OS=Homo sapiens (Human) OX=9606 GN=ARFGEF1 PE=1 SV=2	ARFGEF1	0.002	318.666	32	50	115	50	1849	208.6
High	O00203	AP-3 complex subunit beta-1 OS=Homo sapiens (Human) OX=9606 GN=AP3B1 PE=1 SV=3	AP3B1	0.002	291.193	49	50	163	50	1094	121.2
High	Q01970	1-phosphatidylinositol 4,5-bisphosphate phosphodiesterase beta-3 OS=Homo sapiens (Human) OX=9606 GN=PLCB3 PE=1 SV=2	PLCB3	0.002	269.486	44	50	108	50	1234	138.7
High	Q6PL18	ATPase family AAA domain-containing protein 2 OS=Homo sapiens (Human) OX=9606 GN=ATAD2 PE=1 SV=1	ATAD2	0.001	257.971	45	50	99	50	1390	158.5
High	Q9H1A4	Anaphase-promoting complex subunit 1 OS=Homo sapiens (Human) OX=9606 GN=ANAPC1 PE=1 SV=1	ANAPC1	0.001	257.902	34	50	100	50	1944	216.4
High	Q8NFP9	Neurobeachin OS=Homo sapiens (Human) OX=9606 GN=NBEA PE=1 SV=3	NBEA	0.001	243.028	23	50	99	50	2946	327.6
High	Q13535	Serine/threonine-protein kinase ATR OS=Homo sapiens (Human) OX=9606 GN=ATR PE=1 SV=3	ATR	0.001	242.14	21	50	97	50	2644	301.2
High	Q96JI7	Spatacsin OS=Homo sapiens (Human) OX=9606 GN=SPG11 PE=1 SV=3	SPG11	0.001	232.646	22	50	101	50	2443	278.7
High	Q9UG01	Intraflagellar transport protein 172 homolog OS=Homo sapiens (Human) OX=9606 GN=IFT172 PE=1 SV=2	IFT172	0.001	225.961	34	50	83	50	1749	197.5
High	Q6UB99	Ankyrin repeat domain-containing protein 11 OS=Homo sapiens (Human) OX=9606 GN=ANKRD11 PE=1 SV=3	ANKRD11	0.001	182.747	23	50	74	50	2663	297.7
High	Q15424	Scaffold attachment factor B1 OS=Homo sapiens (Human) OX=9606 GN=SAFB PE=1 SV=4	SAFB	0.005	451.162	45	49	266	49	915	102.6
High	P11021	Endoplasmic reticulum chaperone BiP OS=Homo sapiens (Human) OX=9606 GN=HSPA5 PE=1 SV=2	HSPA5	0.004	442.843	66	49	495	49	654	72.3
High	P31948	Stress-induced-phosphoprotein 1 OS=Homo sapiens (Human) OX=9606 GN=STIP1 PE=1 SV=1	STIP1	0.004	425.577	69	49	374	49	543	62.6
High	O95782	AP-2 complex subunit alpha-1 OS=Homo sapiens (Human) OX=9606 GN=AP2A1 PE=1 SV=3	AP2A1	0.004	421.252	53	49	275	49	977	107.5
High	Q15020	Squamous cell carcinoma antigen recognized by T-cells 3 OS=Homo sapiens (Human) OX=9606 GN=SART3 PE=1 SV=1	SART3	0.004	403.928	52	49	187	49	963	109.9
High	P57740	Nuclear pore complex protein Nup107 OS=Homo sapiens (Human) OX=9606 GN=NUP107 PE=1 SV=1	NUP107	0.003	396.501	59	49	188	49	925	106.3
High	P50570	Dynamin-2 OS=Homo sapiens (Human) OX=9606 GN=DNM2 PE=1 SV=2	DNM2	0.003	393.638	48	49	193	49	870	98
High	Q03252	Lamin-B2 OS=Homo sapiens (Human) OX=9606 GN=LMNB2 PE=1 SV=4	LMNB2	0.003	385.443	63	49	239	49	620	69.9
High	O95163	Elongator complex protein 1 OS=Homo sapiens (Human) OX=9606 GN=ELP1 PE=1 SV=3	ELP1	0.003	362.597	51	49	168	49	1332	150.2
High	Q9UIA9	Exportin-7 OS=Homo sapiens (Human) OX=9606 GN=XPO7 PE=1 SV=3	XPO7	0.002	339.534	49	49	159	49	1087	123.8
High	Q9H2M9	Rab3 GTPase-activating protein non-catalytic subunit OS=Homo sapiens (Human) OX=9606 GN=RAB3GAP2 PE=1 SV=1	RAB3GAP2	0.002	338.371	41	49	150	49	1393	155.9
High	O75970	Multiple PDZ domain protein OS=Homo sapiens (Human) OX=9606 GN=MPDZ PE=1 SV=2	MPDZ	0.002	315.956	34	49	127	49	2070	221.5
High	Q03701	CCAAT/enhancer-binding protein zeta OS=Homo sapiens (Human) OX=9606 GN=CEBPZ PE=1 SV=3	CEBPZ	0.002	314.519	56	49	164	49	1054	120.9
High	Q92797	Symplekin OS=Homo sapiens (Human) OX=9606 GN=SYMPK PE=1 SV=2	SYMPK	0.002	314.278	41	49	156	49	1274	141.1
High	Q3KQU3	MAP7 domain-containing protein 1 OS=Homo sapiens (Human) OX=9606 GN=MAP7D1 PE=1 SV=1	MAP7D1	0.002	300.034	58	49	127	49	841	92.8
High	Q15648	Mediator of RNA polymerase II transcription subunit 1 OS=Homo sapiens (Human) OX=9606 GN=MED1 PE=1 SV=4	MED1	0.002	296.717	45	49	127	49	1581	168.4
High	Q13332	Receptor-type tyrosine-protein phosphatase S OS=Homo sapiens (Human) OX=9606 GN=PTPRS PE=1 SV=3	PTPRS	0.002	284.784	37	49	120	49	1948	216.9
High	Q15811	Intersectin-1 OS=Homo sapiens (Human) OX=9606 GN=ITSN1 PE=1 SV=3	ITSN1	0.002	280.647	37	49	121	49	1721	195.3
High	Q99707	Methionine synthase OS=Homo sapiens (Human) OX=9606 GN=MTR PE=1 SV=2	MTR	0.002	279.156	45	49	123	49	1265	140.4
High	Q9UHN6	Cell surface hyaluronidase OS=Homo sapiens (Human) OX=9606 GN=CEMIP2 PE=1 SV=1	CEMIP2	0.002	267.098	43	49	129	49	1383	154.3
High	P07942	Laminin subunit beta-1 OS=Homo sapiens (Human) OX=9606 GN=LAMB1 PE=1 SV=2	LAMB1	0.001	256.253	42	49	95	49	1786	197.9
High	Q5T5Y3	Calmodulin-regulated spectrin-associated protein 1 OS=Homo sapiens (Human) OX=9606 GN=CAMSAP1 PE=1 SV=2	CAMSAP1	0.001	247.082	41	49	84	49	1602	177.9
High	O15027	Protein transport protein Sec16A OS=Homo sapiens (Human) OX=9606 GN=SEC16A PE=1 SV=4	SEC16A	0.001	231.288	35	49	89	49	2357	251.7
High	O94964	Protein SOGA1 OS=Homo sapiens (Human) OX=9606 GN=SOGA1 PE=1 SV=2	SOGA1	0.001	198.889	41	49	75	49	1423	159.7
High	Q9Y4B5	Microtubule cross-linking factor 1 OS=Homo sapiens (Human) OX=9606 GN=MTCL1 PE=1 SV=5	MTCL1	0.001	195.612	32	49	85	49	1905	209.4
High	Q8WXG9	Adhesion G-protein coupled receptor V1 OS=Homo sapiens (Human) OX=9606 GN=ADGRV1 PE=1 SV=2	ADGRV1	0.001	194.011	11	49	69	49	6306	692.6
High	Q7Z7G8	Vacuolar protein sorting-associated protein 13B OS=Homo sapiens (Human) OX=9606 GN=VPS13B PE=1 SV=2	VPS13B	0.001	170.867	17	49	68	49	4022	448.4
High	P23246	Splicing factor, proline- and glutamine-rich OS=Homo sapiens (Human) OX=9606 GN=SFPQ PE=1 SV=2	SFPQ	0.018	676.128	62	48	1029	48	707	76.1
High	P12956	X-ray repair cross-complementing protein 6 OS=Homo sapiens (Human) OX=9606 GN=XRCC6 PE=1 SV=2	XRCC6	0.007	513.257	61	48	515	48	609	69.8
High	P45974	Ubiquitin carboxyl-terminal hydrolase 5 OS=Homo sapiens (Human) OX=9606 GN=USP5 PE=1 SV=2	USP5	0.007	508.282	61	48	317	48	858	95.7
High	P49736	DNA replication licensing factor MCM2 OS=Homo sapiens (Human) OX=9606 GN=MCM2 PE=1 SV=4	MCM2	0.006	488.205	64	48	342	48	904	101.8
High	P49588	Alanine--tRNA ligase, cytoplasmic OS=Homo sapiens (Human) OX=9606 GN=AARS1 PE=1 SV=2	AARS1	0.004	436.368	57	48	249	48	968	106.7
High	P11171	Protein 4.1 OS=Homo sapiens (Human) OX=9606 GN=EPB41 PE=1 SV=4	EPB41	0.004	413.117	66	48	258	48	864	97
High	Q15459	Splicing factor 3A subunit 1 OS=Homo sapiens (Human) OX=9606 GN=SF3A1 PE=1 SV=1	SF3A1	0.003	392.263	67	48	300	48	793	88.8
High	P19367	Hexokinase-1 OS=Homo sapiens (Human) OX=9606 GN=HK1 PE=1 SV=3	HK1	0.003	384.961	58	48	198	48	917	102.4
High	P28340	DNA polymerase delta catalytic subunit OS=Homo sapiens (Human) OX=9606 GN=POLD1 PE=1 SV=2	POLD1	0.003	363.035	52	48	206	48	1107	123.6
High	A1X283	SH3 and PX domain-containing protein 2B OS=Homo sapiens (Human) OX=9606 GN=SH3PXD2B PE=1 SV=3	SH3PXD2B	0.002	338.015	56	48	191	48	911	101.5
High	P35251	Replication factor C subunit 1 OS=Homo sapiens (Human) OX=9606 GN=RFC1 PE=1 SV=4	RFC1	0.002	323.708	45	48	140	48	1148	128.2
High	Q9HCE1	Helicase MOV-10 OS=Homo sapiens (Human) OX=9606 GN=MOV10 PE=1 SV=2	MOV10	0.002	310.886	52	48	151	48	1003	113.6
High	Q9NRZ9	Lymphoid-specific helicase OS=Homo sapiens (Human) OX=9606 GN=HELLS PE=1 SV=1	HELLS	0.002	304.395	59	48	147	48	838	97
High	O75122	CLIP-associating protein 2 OS=Homo sapiens (Human) OX=9606 GN=CLASP2 PE=1 SV=3	CLASP2	0.001	254.284	44	48	97	48	1294	141
High	Q9UPN4	Centrosomal protein of 131 kDa OS=Homo sapiens (Human) OX=9606 GN=CEP131 PE=1 SV=3	CEP131	0.001	209.284	45	48	91	48	1083	122.1
High	O00750	Phosphatidylinositol 4-phosphate 3-kinase C2 domain-containing subunit beta OS=Homo sapiens (Human) OX=9606 GN=PIK3C2B PE=1 SV=2	PIK3C2B	0.001	209.118	33	48	84	48	1634	184.7
High	A3KMH1	von Willebrand factor A domain-containing protein 8 OS=Homo sapiens (Human) OX=9606 GN=VWA8 PE=1 SV=2	VWA8	0.001	201.152	28	48	82	48	1905	214.7
High	O94915	Protein furry homolog-like OS=Homo sapiens (Human) OX=9606 GN=FRYL PE=1 SV=2	FRYL	0.001	198.227	17	48	77	48	3013	339.4
High	Q9H2D6	TRIO and F-actin-binding protein OS=Homo sapiens (Human) OX=9606 GN=TRIOBP PE=1 SV=3	TRIOBP	0.001	197.21	22	48	79	48	2365	261.2
High	Q8NG31	Kinetochore scaffold 1 OS=Homo sapiens (Human) OX=9606 GN=KNL1 PE=1 SV=3	KNL1	0.001	176.707	22	48	72	48	2342	265.2
High	B2RTY4	Unconventional myosin-IXa OS=Homo sapiens (Human) OX=9606 GN=MYO9A PE=1 SV=2	MYO9A	0.001	158.07	23	48	82	48	2548	292.5
High	P35527	Keratin, type I cytoskeletal 9 OS=Homo sapiens (Human) OX=9606 GN=KRT9 PE=1 SV=3	KRT9	0.021	732.906	81	47	897	47	623	62
High	P08670	Vimentin OS=Homo sapiens (Human) OX=9606 GN=VIM PE=1 SV=4	VIM	0.012	604.413	86	47	889	47	466	53.6	Rgish
High	O43143	Pre-mRNA-splicing factor ATP-dependent RNA helicase DHX15 OS=Homo sapiens (Human) OX=9606 GN=DHX15 PE=1 SV=2	DHX15	0.004	435.722	54	47	479	47	795	90.9
High	P05023	Sodium/potassium-transporting ATPase subunit alpha-1 OS=Homo sapiens (Human) OX=9606 GN=ATP1A1 PE=1 SV=1	ATP1A1	0.004	434.879	47	47	280	47	1023	112.8
High	O15067	Phosphoribosylformylglycinamidine synthase OS=Homo sapiens (Human) OX=9606 GN=PFAS PE=1 SV=4	PFAS	0.004	400.376	45	47	241	47	1338	144.6
High	Q92499	ATP-dependent RNA helicase DDX1 OS=Homo sapiens (Human) OX=9606 GN=DDX1 PE=1 SV=2	DDX1	0.003	386.278	76	47	333	47	740	82.4
High	O00267	Transcription elongation factor SPT5 OS=Homo sapiens (Human) OX=9606 GN=SUPT5H PE=1 SV=1	SUPT5H	0.003	354.489	55	47	166	47	1087	120.9
High	P78344	Eukaryotic translation initiation factor 4 gamma 2 OS=Homo sapiens (Human) OX=9606 GN=EIF4G2 PE=1 SV=1	EIF4G2	0.003	347.08	54	47	213	47	907	102.3
High	Q9NYF8	Bcl-2-associated transcription factor 1 OS=Homo sapiens (Human) OX=9606 GN=BCLAF1 PE=1 SV=2	BCLAF1	0.002	340.887	42	47	242	47	920	106.1
High	Q7Z3K3	Pogo transposable element with ZNF domain OS=Homo sapiens (Human) OX=9606 GN=POGZ PE=1 SV=2	POGZ	0.002	334.728	41	47	141	47	1410	155.2
High	O60282	Kinesin heavy chain isoform 5C OS=Homo sapiens (Human) OX=9606 GN=KIF5C PE=1 SV=1	KIF5C	0.002	313.885	51	47	137	47	957	109.4
High	A0AVT1	Ubiquitin-like modifier-activating enzyme 6 OS=Homo sapiens (Human) OX=9606 GN=UBA6 PE=1 SV=1	UBA6	0.002	296.903	53	47	156	47	1052	117.9
High	Q5VTR2	E3 ubiquitin-protein ligase BRE1A OS=Homo sapiens (Human) OX=9606 GN=RNF20 PE=1 SV=2	RNF20	0.002	288.464	46	47	121	47	975	113.6
High	Q9NWH9	SAFB-like transcription modulator OS=Homo sapiens (Human) OX=9606 GN=SLTM PE=1 SV=2	SLTM	0.002	282.723	40	47	129	47	1034	117.1
High	Q13796	Protein Shroom2 OS=Homo sapiens (Human) OX=9606 GN=SHROOM2 PE=1 SV=1	SHROOM2	0.001	240.13	35	47	88	47	1616	176.3
High	Q7Z3U7	Protein MON2 homolog OS=Homo sapiens (Human) OX=9606 GN=MON2 PE=1 SV=3	MON2	0.001	237.615	35	47	110	47	1717	190.2
High	Q5T200	Zinc finger CCCH domain-containing protein 13 OS=Homo sapiens (Human) OX=9606 GN=ZC3H13 PE=1 SV=1	ZC3H13	0.001	200.122	26	47	92	47	1668	196.5
High	P13010	X-ray repair cross-complementing protein 5 OS=Homo sapiens (Human) OX=9606 GN=XRCC5 PE=1 SV=3	XRCC5	0.009	561.134	61	46	415	46	732	82.7
High	P13667	Protein disulfide-isomerase A4 OS=Homo sapiens (Human) OX=9606 GN=PDIA4 PE=1 SV=2	PDIA4	0.008	524.491	60	46	401	46	645	72.9
High	Q92841	Probable ATP-dependent RNA helicase DDX17 OS=Homo sapiens (Human) OX=9606 GN=DDX17 PE=1 SV=2	DDX17	0.006	486.131	62	46	492	46	729	80.2
High	P33991	DNA replication licensing factor MCM4 OS=Homo sapiens (Human) OX=9606 GN=MCM4 PE=1 SV=5	MCM4	0.004	421.726	60	46	295	46	863	96.5
High	Q99459	Cell division cycle 5-like protein OS=Homo sapiens (Human) OX=9606 GN=CDC5L PE=1 SV=2	CDC5L	0.003	359.318	52	46	195	46	802	92.2
High	Q9UPT8	Zinc finger CCCH domain-containing protein 4 OS=Homo sapiens (Human) OX=9606 GN=ZC3H4 PE=1 SV=3	ZC3H4	0.003	357.718	46	46	124	46	1303	140.2
High	Q12769	Nuclear pore complex protein Nup160 OS=Homo sapiens (Human) OX=9606 GN=NUP160 PE=1 SV=3	NUP160	0.002	331.255	43	46	142	46	1436	162
High	P46459	Vesicle-fusing ATPase OS=Homo sapiens (Human) OX=9606 GN=NSF PE=1 SV=3	NSF	0.002	328.637	62	46	191	46	744	82.5
High	Q9Y6K1	DNA (cytosine-5)-methyltransferase 3A OS=Homo sapiens (Human) OX=9606 GN=DNMT3A PE=1 SV=4	DNMT3A	0.002	317.473	58	46	154	46	912	101.8
High	P21399	Cytoplasmic aconitate hydratase OS=Homo sapiens (Human) OX=9606 GN=ACO1 PE=1 SV=3	ACO1	0.002	301.204	56	46	145	46	889	98.3
High	Q9H0A0	RNA cytidine acetyltransferase OS=Homo sapiens (Human) OX=9606 GN=NAT10 PE=1 SV=2	NAT10	0.002	298.669	44	46	154	46	1025	115.7
High	Q92859	Neogenin OS=Homo sapiens (Human) OX=9606 GN=NEO1 PE=1 SV=2	NEO1	0.002	293.532	43	46	114	46	1461	159.9
High	Q6Y7W6	GRB10-interacting GYF protein 2 OS=Homo sapiens (Human) OX=9606 GN=GIGYF2 PE=1 SV=1	GIGYF2	0.002	286.39	43	46	110	46	1299	150
High	O75153	Clustered mitochondria protein homolog OS=Homo sapiens (Human) OX=9606 GN=CLUH PE=1 SV=2	CLUH	0.002	281.488	42	46	134	46	1309	146.6
High	Q9HCG8	Pre-mRNA-splicing factor CWC22 homolog OS=Homo sapiens (Human) OX=9606 GN=CWC22 PE=1 SV=3	CWC22	0.002	268.392	49	46	129	46	908	105.4
High	Q12768	WASH complex subunit 5 OS=Homo sapiens (Human) OX=9606 GN=WASHC5 PE=1 SV=1	WASHC5	0.001	250.148	41	46	109	46	1159	134.2
High	O95248	Myotubularin-related protein 5 OS=Homo sapiens (Human) OX=9606 GN=SBF1 PE=1 SV=4	SBF1	0.001	248.974	36	46	82	46	1868	208.3
High	Q9UIF9	Bromodomain adjacent to zinc finger domain protein 2A OS=Homo sapiens (Human) OX=9606 GN=BAZ2A PE=1 SV=4	BAZ2A	0.001	244.235	34	46	98	46	1905	211.1
High	Q8IXT5	RNA-binding protein 12B OS=Homo sapiens (Human) OX=9606 GN=RBM12B PE=1 SV=2	RBM12B	0.001	238.325	48	46	135	46	1001	118
High	Q96QC0	Serine/threonine-protein phosphatase 1 regulatory subunit 10 OS=Homo sapiens (Human) OX=9606 GN=PPP1R10 PE=1 SV=1	PPP1R10	0.001	236.936	56	46	129	46	940	99
High	Q9UGL1	Lysine-specific demethylase 5B OS=Homo sapiens (Human) OX=9606 GN=KDM5B PE=1 SV=3	KDM5B	0.001	236.437	33	46	90	46	1544	175.5
High	Q8TEP8	Centrosomal protein of 192 kDa OS=Homo sapiens (Human) OX=9606 GN=CEP192 PE=1 SV=3	CEP192	0.001	214.026	24	46	77	46	2537	278.9
High	Q6ZU35	Capping protein inhibiting regulator of actin dynamics OS=Homo sapiens (Human) OX=9606 GN=CRACD PE=1 SV=3	CRACD	0.001	197.205	47	46	78	46	1233	136.7
High	O14647	Chromodomain-helicase-DNA-binding protein 2 OS=Homo sapiens (Human) OX=9606 GN=CHD2 PE=1 SV=2	CHD2	0.001	195.783	30	46	83	46	1828	211.2
High	Q8IZQ1	WD repeat and FYVE domain-containing protein 3 OS=Homo sapiens (Human) OX=9606 GN=WDFY3 PE=1 SV=2	WDFY3	0.001	192.574	17	46	76	46	3526	395
High	Q9H2Y7	Zinc finger protein 106 OS=Homo sapiens (Human) OX=9606 GN=ZNF106 PE=1 SV=1	ZNF106	0.001	184.952	31	46	67	46	1883	208.8
High	Q9Y2F5	Little elongation complex subunit 1 OS=Homo sapiens (Human) OX=9606 GN=ICE1 PE=1 SV=5	ICE1	0.001	150.635	28	46	59	46	2266	247.7
High	P30101	Protein disulfide-isomerase A3 OS=Homo sapiens (Human) OX=9606 GN=PDIA3 PE=1 SV=4	PDIA3	0.007	514.109	72	45	432	45	505	56.7
High	P53618	Coatomer subunit beta OS=Homo sapiens (Human) OX=9606 GN=COPB1 PE=1 SV=3	COPB1	0.006	485.023	57	45	263	45	953	107.1
High	P11216	Glycogen phosphorylase, brain form OS=Homo sapiens (Human) OX=9606 GN=PYGB PE=1 SV=5	PYGB	0.004	417.908	61	45	237	45	843	96.6
High	Q9NR30	Nucleolar RNA helicase 2 OS=Homo sapiens (Human) OX=9606 GN=DDX21 PE=1 SV=5	DDX21	0.004	410.272	60	45	275	45	783	87.3
High	P35606	Coatomer subunit beta' OS=Homo sapiens (Human) OX=9606 GN=COPB2 PE=1 SV=2	COPB2	0.003	362.171	58	45	243	45	906	102.4
High	O75694	Nuclear pore complex protein Nup155 OS=Homo sapiens (Human) OX=9606 GN=NUP155 PE=1 SV=1	NUP155	0.003	349.765	38	45	189	45	1391	155.1
High	Q86XP3	ATP-dependent RNA helicase DDX42 OS=Homo sapiens (Human) OX=9606 GN=DDX42 PE=1 SV=1	DDX42	0.002	346.584	63	45	167	45	938	102.9
High	P20020	Plasma membrane calcium-transporting ATPase 1 OS=Homo sapiens (Human) OX=9606 GN=ATP2B1 PE=1 SV=4	ATP2B1	0.002	341.349	37	45	179	45	1220	134.6
High	Q8TAQ2	SWI/SNF complex subunit SMARCC2 OS=Homo sapiens (Human) OX=9606 GN=SMARCC2 PE=1 SV=1	SMARCC2	0.002	310.382	40	45	141	45	1214	132.8
High	Q9HCS7	Pre-mRNA-splicing factor SYF1 OS=Homo sapiens (Human) OX=9606 GN=XAB2 PE=1 SV=2	XAB2	0.002	304.938	53	45	118	45	855	99.9
High	Q8WUM0	Nuclear pore complex protein Nup133 OS=Homo sapiens (Human) OX=9606 GN=NUP133 PE=1 SV=2	NUP133	0.002	288.731	45	45	148	45	1156	128.9
High	Q9UNS1	Protein timeless homolog OS=Homo sapiens (Human) OX=9606 GN=TIMELESS PE=1 SV=2	TIMELESS	0.002	279.783	44	45	131	45	1208	138.6
High	P14735	Insulin-degrading enzyme OS=Homo sapiens (Human) OX=9606 GN=IDE PE=1 SV=4	IDE	0.002	272.51	41	45	154	45	1019	117.9
High	Q9BVJ6	U3 small nucleolar RNA-associated protein 14 homolog A OS=Homo sapiens (Human) OX=9606 GN=UTP14A PE=1 SV=1	UTP14A	0.001	259.442	61	45	114	45	771	87.9
High	A3KN83	Protein strawberry notch homolog 1 OS=Homo sapiens (Human) OX=9606 GN=SBNO1 PE=1 SV=1	SBNO1	0.001	259.427	38	45	93	45	1393	154.2
High	Q14997	Proteasome activator complex subunit 4 OS=Homo sapiens (Human) OX=9606 GN=PSME4 PE=1 SV=2	PSME4	0.001	255.128	28	45	106	45	1843	211.2
High	Q92626	Peroxidasin homolog OS=Homo sapiens (Human) OX=9606 GN=PXDN PE=1 SV=2	PXDN	0.001	251.091	43	45	123	45	1479	165.2
High	P02751	Fibronectin OS=Homo sapiens (Human) OX=9606 GN=FN1 PE=1 SV=5	FN1	0.001	224.862	25	45	91	45	2477	272.2
High	Q92618	Zinc finger protein 516 OS=Homo sapiens (Human) OX=9606 GN=ZNF516 PE=1 SV=1	ZNF516	0.001	223.597	47	45	82	45	1163	124.2
High	O60287	Nucleolar pre-ribosomal-associated protein 1 OS=Homo sapiens (Human) OX=9606 GN=URB1 PE=1 SV=4	URB1	0.001	219.312	24	45	90	45	2271	254.2
High	Q8IY18	Structural maintenance of chromosomes protein 5 OS=Homo sapiens (Human) OX=9606 GN=SMC5 PE=1 SV=2	SMC5	0.001	208.013	41	45	91	45	1101	128.7
High	Q6YHU6	Thyroid adenoma-associated protein OS=Homo sapiens (Human) OX=9606 GN=THADA PE=1 SV=1	THADA	0.001	202.498	29	45	77	45	1953	219.5
High	Q9Y6R4	Mitogen-activated protein kinase kinase kinase 4 OS=Homo sapiens (Human) OX=9606 GN=MAP3K4 PE=1 SV=2	MAP3K4	0.001	198.638	35	45	89	45	1608	181.6
High	Q2NKX8	DNA excision repair protein ERCC-6-like OS=Homo sapiens (Human) OX=9606 GN=ERCC6L PE=1 SV=1	ERCC6L	0.001	195.988	42	45	77	45	1250	141
High	Q5T5U3	Rho GTPase-activating protein 21 OS=Homo sapiens (Human) OX=9606 GN=ARHGAP21 PE=1 SV=2	ARHGAP21	0.001	152.495	27	45	55	45	1958	217.3
High	P11142	Heat shock cognate 71 kDa protein OS=Homo sapiens (Human) OX=9606 GN=HSPA8 PE=1 SV=1	HSPA8	0.009	536.377	72	44	829	44	646	70.9
High	P49368	T-complex protein 1 subunit gamma OS=Homo sapiens (Human) OX=9606 GN=CCT3 PE=1 SV=4	CCT3	0.008	534.106	72	44	407	44	545	60.5
High	Q8NE71	ATP-binding cassette sub-family F member 1 OS=Homo sapiens (Human) OX=9606 GN=ABCF1 PE=1 SV=2	ABCF1	0.004	409.927	65	44	237	44	845	95.9
High	P63010	AP-2 complex subunit beta OS=Homo sapiens (Human) OX=9606 GN=AP2B1 PE=1 SV=1	AP2B1	0.003	387.821	49	44	214	44	937	104.5
High	B5ME19	Eukaryotic translation initiation factor 3 subunit C-like protein OS=Homo sapiens (Human) OX=9606 GN=EIF3CL PE=1 SV=1	EIF3CL	0.003	365.081	50	44	234	44	914	105.4
High	Q8IX12	Cell division cycle and apoptosis regulator protein 1 OS=Homo sapiens (Human) OX=9606 GN=CCAR1 PE=1 SV=2	CCAR1	0.002	342.284	41	44	234	44	1150	132.7
High	Q16891	MICOS complex subunit MIC60 OS=Homo sapiens (Human) OX=9606 GN=IMMT PE=1 SV=1	IMMT	0.002	341.556	59	44	142	44	758	83.6
High	Q9Y2L1	Exosome complex exonuclease RRP44 OS=Homo sapiens (Human) OX=9606 GN=DIS3 PE=1 SV=2	DIS3	0.002	332.468	56	44	155	44	958	108.9
High	P28370	Probable global transcription activator SNF2L1 OS=Homo sapiens (Human) OX=9606 GN=SMARCA1 PE=1 SV=2	SMARCA1	0.002	325.543	35	44	166	44	1054	122.5
High	Q8N3U4	Cohesin subunit SA-2 OS=Homo sapiens (Human) OX=9606 GN=STAG2 PE=1 SV=3	STAG2	0.002	311.866	39	44	122	44	1231	141.2
High	Q14202	Zinc finger MYM-type protein 3 OS=Homo sapiens (Human) OX=9606 GN=ZMYM3 PE=1 SV=2	ZMYM3	0.002	309.572	40	44	128	44	1370	152.3
High	O95202	Mitochondrial proton/calcium exchanger protein OS=Homo sapiens (Human) OX=9606 GN=LETM1 PE=1 SV=1	LETM1	0.002	306.626	56	44	137	44	739	83.3
High	Q9BTW9	Tubulin-specific chaperone D OS=Homo sapiens (Human) OX=9606 GN=TBCD PE=1 SV=2	TBCD	0.002	282.783	51	44	140	44	1192	132.5
High	Q9H4A3	Serine/threonine-protein kinase WNK1 OS=Homo sapiens (Human) OX=9606 GN=WNK1 PE=1 SV=2	WNK1	0.002	275.705	28	44	119	44	2382	250.6
High	O75152	Zinc finger CCCH domain-containing protein 11A OS=Homo sapiens (Human) OX=9606 GN=ZC3H11A PE=1 SV=3	ZC3H11A	0.002	270.226	63	44	120	44	810	89.1
High	Q8TDD1	ATP-dependent RNA helicase DDX54 OS=Homo sapiens (Human) OX=9606 GN=DDX54 PE=1 SV=2	DDX54	0.002	270.011	51	44	91	44	881	98.5
High	O95155	Ubiquitin conjugation factor E4 B OS=Homo sapiens (Human) OX=9606 GN=UBE4B PE=1 SV=1	UBE4B	0.002	269.978	44	44	108	44	1302	146.1
High	Q6P2E9	Enhancer of mRNA-decapping protein 4 OS=Homo sapiens (Human) OX=9606 GN=EDC4 PE=1 SV=1	EDC4	0.001	264.91	44	44	131	44	1401	151.6
High	O60885	Bromodomain-containing protein 4 OS=Homo sapiens (Human) OX=9606 GN=BRD4 PE=1 SV=2	BRD4	0.001	263.124	41	44	167	44	1362	152.1
High	Q92620	Pre-mRNA-splicing factor ATP-dependent RNA helicase PRP16 OS=Homo sapiens (Human) OX=9606 GN=DHX38 PE=1 SV=2	DHX38	0.001	256.95	44	44	114	44	1227	140.4
High	Q9UKV8	Protein argonaute-2 OS=Homo sapiens (Human) OX=9606 GN=AGO2 PE=1 SV=3	AGO2	0.001	247.398	60	44	108	44	859	97.1
High	Q13045	Protein flightless-1 homolog OS=Homo sapiens (Human) OX=9606 GN=FLII PE=1 SV=2	FLII	0.001	245.646	41	44	106	44	1269	144.7
High	P11274	Breakpoint cluster region protein OS=Homo sapiens (Human) OX=9606 GN=BCR PE=1 SV=2	BCR	0.001	243.982	47	44	107	44	1271	142.7
High	Q9H3S7	Tyrosine-protein phosphatase non-receptor type 23 OS=Homo sapiens (Human) OX=9606 GN=PTPN23 PE=1 SV=1	PTPN23	0.001	239.945	32	44	104	44	1636	178.9
High	Q6PD62	RNA polymerase-associated protein CTR9 homolog OS=Homo sapiens (Human) OX=9606 GN=CTR9 PE=1 SV=1	CTR9	0.001	234.466	43	44	95	44	1173	133.4
High	Q99570	Phosphoinositide 3-kinase regulatory subunit 4 OS=Homo sapiens (Human) OX=9606 GN=PIK3R4 PE=1 SV=3	PIK3R4	0.001	232.764	37	44	94	44	1358	153
High	P41229	Lysine-specific demethylase 5C OS=Homo sapiens (Human) OX=9606 GN=KDM5C PE=1 SV=2	KDM5C	0.001	221.428	36	44	85	44	1560	175.6
High	Q9Y6N7	Roundabout homolog 1 OS=Homo sapiens (Human) OX=9606 GN=ROBO1 PE=1 SV=1	ROBO1	0.001	198.019	35	44	89	44	1651	180.8
High	P49790	Nuclear pore complex protein Nup153 OS=Homo sapiens (Human) OX=9606 GN=NUP153 PE=1 SV=2	NUP153	0.001	194.474	35	44	90	44	1475	153.8
High	Q15911	Zinc finger homeobox protein 3 OS=Homo sapiens (Human) OX=9606 GN=ZFHX3 PE=1 SV=2	ZFHX3	0.001	172.659	20	44	67	44	3703	404.2
High	Q15058	Kinesin-like protein KIF14 OS=Homo sapiens (Human) OX=9606 GN=KIF14 PE=1 SV=1	KIF14	0.001	169.434	30	44	72	44	1648	186.4
High	O15230	Laminin subunit alpha-5 OS=Homo sapiens (Human) OX=9606 GN=LAMA5 PE=1 SV=8	LAMA5	0.001	145.703	21	44	59	44	3695	399.5
High	Q7Z7A1	Centriolin OS=Homo sapiens (Human) OX=9606 GN=CNTRL PE=1 SV=2	CNTRL	0.001	126.796	17	44	57	44	2325	268.7
High	Q5VU43	Myomegalin OS=Homo sapiens (Human) OX=9606 GN=PDE4DIP PE=1 SV=3	PDE4DIP	0.001	123.324	25	44	59	44	2346	264.9
High	P27694	Replication protein A 70 kDa DNA-binding subunit OS=Homo sapiens (Human) OX=9606 GN=RPA1 PE=1 SV=2	RPA1	0.005	464.876	72	43	292	43	616	68.1
High	P23921	Ribonucleoside-diphosphate reductase large subunit OS=Homo sapiens (Human) OX=9606 GN=RRM1 PE=1 SV=1	RRM1	0.004	399.993	63	43	272	43	792	90
High	Q9UBT2	SUMO-activating enzyme subunit 2 OS=Homo sapiens (Human) OX=9606 GN=UBA2 PE=1 SV=2	UBA2	0.003	389.556	61	43	195	43	640	71.2
High	O00571	ATP-dependent RNA helicase DDX3X OS=Homo sapiens (Human) OX=9606 GN=DDX3X PE=1 SV=3	DDX3X	0.003	380.406	63	43	335	43	662	73.2
High	P35221	Catenin alpha-1 OS=Homo sapiens (Human) OX=9606 GN=CTNNA1 PE=1 SV=1	CTNNA1	0.003	374.555	62	43	190	43	906	100
High	Q9BUJ2	Heterogeneous nuclear ribonucleoprotein U-like protein 1 OS=Homo sapiens (Human) OX=9606 GN=HNRNPUL1 PE=1 SV=2	HNRNPUL1	0.003	363.864	57	43	205	43	856	95.7
High	O15042	U2 snRNP-associated SURP motif-containing protein OS=Homo sapiens (Human) OX=9606 GN=U2SURP PE=1 SV=2	U2SURP	0.003	358.99	48	43	168	43	1029	118.2
High	Q9UDR5	Alpha-aminoadipic semialdehyde synthase, mitochondrial OS=Homo sapiens (Human) OX=9606 GN=AASS PE=1 SV=1	AASS	0.002	327.116	53	43	178	43	926	102.1
High	P54136	Arginine--tRNA ligase, cytoplasmic OS=Homo sapiens (Human) OX=9606 GN=RARS1 PE=1 SV=2	RARS1	0.002	315.885	63	43	204	43	660	75.3
High	Q05682	Caldesmon OS=Homo sapiens (Human) OX=9606 GN=CALD1 PE=1 SV=3	CALD1	0.002	305.662	47	43	172	43	793	93.2
High	Q5SRE5	Nucleoporin NUP188 homolog OS=Homo sapiens (Human) OX=9606 GN=NUP188 PE=1 SV=1	NUP188	0.002	299.272	26	43	147	43	1749	195.9
High	P23588	Eukaryotic translation initiation factor 4B OS=Homo sapiens (Human) OX=9606 GN=EIF4B PE=1 SV=2	EIF4B	0.002	297.706	55	43	219	43	611	69.1
High	Q8TCS8	Polyribonucleotide nucleotidyltransferase 1, mitochondrial OS=Homo sapiens (Human) OX=9606 GN=PNPT1 PE=1 SV=2	PNPT1	0.002	287.054	52	43	129	43	783	85.9
High	P23229	Integrin alpha-6 OS=Homo sapiens (Human) OX=9606 GN=ITGA6 PE=1 SV=5	ITGA6	0.002	282.665	44	43	130	43	1130	126.5
High	Q9BXW9	Fanconi anemia group D2 protein OS=Homo sapiens (Human) OX=9606 GN=FANCD2 PE=1 SV=2	FANCD2	0.002	267.515	35	43	111	43	1451	164
High	Q9HAU5	Regulator of nonsense transcripts 2 OS=Homo sapiens (Human) OX=9606 GN=UPF2 PE=1 SV=1	UPF2	0.001	266.399	38	43	114	43	1272	147.7
High	Q8TER5	Rho guanine nucleotide exchange factor 40 OS=Homo sapiens (Human) OX=9606 GN=ARHGEF40 PE=1 SV=3	ARHGEF40	0.001	258.693	36	43	90	43	1519	164.6
High	Q4ZG55	Protein GREB1 OS=Homo sapiens (Human) OX=9606 GN=GREB1 PE=2 SV=1	GREB1	0.001	255.534	28	43	97	43	1949	216.3
High	O75976	Carboxypeptidase D OS=Homo sapiens (Human) OX=9606 GN=CPD PE=1 SV=2	CPD	0.001	252.187	35	43	110	43	1380	152.8
High	P52732	Kinesin-like protein KIF11 OS=Homo sapiens (Human) OX=9606 GN=KIF11 PE=1 SV=2	KIF11	0.001	251.076	43	43	123	43	1056	119.1
High	O60318	Germinal-center associated nuclear protein OS=Homo sapiens (Human) OX=9606 GN=MCM3AP PE=1 SV=2	MCM3AP	0.001	233.297	29	43	91	43	1980	218.3
High	Q9HCE3	Zinc finger protein 532 OS=Homo sapiens (Human) OX=9606 GN=ZNF532 PE=1 SV=2	ZNF532	0.001	231.582	39	43	97	43	1301	141.6
High	Q13136	Liprin-alpha-1 OS=Homo sapiens (Human) OX=9606 GN=PPFIA1 PE=1 SV=1	PPFIA1	0.001	224.137	39	43	84	43	1202	135.7
High	Q9UMN6	Histone-lysine N-methyltransferase 2B OS=Homo sapiens (Human) OX=9606 GN=KMT2B PE=1 SV=1	KMT2B	0.001	221.497	26	43	70	43	2715	293.3
High	Q12873	Chromodomain-helicase-DNA-binding protein 3 OS=Homo sapiens (Human) OX=9606 GN=CHD3 PE=1 SV=3	CHD3	0.001	220.855	32	43	80	43	2000	226.5
High	Q5T7N2	LINE-1 type transposase domain-containing protein 1 OS=Homo sapiens (Human) OX=9606 GN=L1TD1 PE=1 SV=1	L1TD1	0.001	217.573	45	43	98	43	865	98.8
High	Q96SB8	Structural maintenance of chromosomes protein 6 OS=Homo sapiens (Human) OX=9606 GN=SMC6 PE=1 SV=2	SMC6	0.001	210.244	42	43	114	43	1091	126.2
High	Q8NHM5	Lysine-specific demethylase 2B OS=Homo sapiens (Human) OX=9606 GN=KDM2B PE=1 SV=1	KDM2B	0.001	207.005	36	43	104	43	1336	152.5
High	Q9Y4B4	Helicase ARIP4 OS=Homo sapiens (Human) OX=9606 GN=RAD54L2 PE=1 SV=4	RAD54L2	0.001	205.534	40	43	76	43	1467	162.7
High	Q7Z5J4	Retinoic acid-induced protein 1 OS=Homo sapiens (Human) OX=9606 GN=RAI1 PE=1 SV=2	RAI1	0.001	204.071	38	43	85	43	1906	203.2
High	O14795	Protein unc-13 homolog B OS=Homo sapiens (Human) OX=9606 GN=UNC13B PE=1 SV=2	UNC13B	0.001	203.361	34	43	89	43	1591	180.6
High	O43295	SLIT-ROBO Rho GTPase-activating protein 3 OS=Homo sapiens (Human) OX=9606 GN=SRGAP3 PE=1 SV=3	SRGAP3	0.001	198.332	44	43	86	43	1099	124.4
High	O43314	Inositol hexakisphosphate and diphosphoinositol-pentakisphosphate kinase 2 OS=Homo sapiens (Human) OX=9606 GN=PPIP5K2 PE=1 SV=3	PPIP5K2	0.001	194.869	39	43	93	43	1243	140.3
High	Q5VZK9	F-actin-uncapping protein LRRC16A OS=Homo sapiens (Human) OX=9606 GN=CARMIL1 PE=1 SV=1	CARMIL1	0.001	186.929	37	43	67	43	1371	151.5
High	Q9HD67	Unconventional myosin-X OS=Homo sapiens (Human) OX=9606 GN=MYO10 PE=1 SV=3	MYO10	0.001	184.558	25	43	71	43	2058	237.2
High	Q6R327	Rapamycin-insensitive companion of mTOR OS=Homo sapiens (Human) OX=9606 GN=RICTOR PE=1 SV=1	RICTOR	0.001	176.522	35	43	69	43	1708	192.1
High	Q6XZF7	Dynamin-binding protein OS=Homo sapiens (Human) OX=9606 GN=DNMBP PE=1 SV=1	DNMBP	0.001	174.284	33	43	79	43	1577	177.2
High	Q5VYS8	Terminal uridylyltransferase 7 OS=Homo sapiens (Human) OX=9606 GN=TUT7 PE=1 SV=1	TUT7	0.001	169.271	33	43	62	43	1495	171.1
High	Q9UHD8	Septin-9 OS=Homo sapiens (Human) OX=9606 GN=SEPTIN9 PE=1 SV=2	SEPTIN9	0.006	485.453	72	42	288	42	586	65.4
High	P51659	Peroxisomal multifunctional enzyme type 2 OS=Homo sapiens (Human) OX=9606 GN=HSD17B4 PE=1 SV=3	HSD17B4	0.005	444.015	60	42	287	42	736	79.6
High	P49915	GMP synthase [glutamine-hydrolyzing] OS=Homo sapiens (Human) OX=9606 GN=GMPS PE=1 SV=1	GMPS	0.003	391.369	68	42	241	42	693	76.7
High	Q9HAV4	Exportin-5 OS=Homo sapiens (Human) OX=9606 GN=XPO5 PE=1 SV=1	XPO5	0.003	363.272	39	42	201	42	1204	136.2
High	Q08J23	RNA cytosine C(5)-methyltransferase NSUN2 OS=Homo sapiens (Human) OX=9606 GN=NSUN2 PE=1 SV=2	NSUN2	0.003	349.638	65	42	191	42	767	86.4
High	Q9H307	Pinin OS=Homo sapiens (Human) OX=9606 GN=PNN PE=1 SV=5	PNN	0.003	348.953	56	42	178	42	717	81.6
High	Q9UJS0	Calcium-binding mitochondrial carrier protein Aralar2 OS=Homo sapiens (Human) OX=9606 GN=SLC25A13 PE=1 SV=2	SLC25A13	0.002	346.263	65	42	243	42	675	74.1
High	Q9UKN8	General transcription factor 3C polypeptide 4 OS=Homo sapiens (Human) OX=9606 GN=GTF3C4 PE=1 SV=2	GTF3C4	0.002	313.21	58	42	150	42	822	91.9
High	P49756	RNA-binding protein 25 OS=Homo sapiens (Human) OX=9606 GN=RBM25 PE=1 SV=3	RBM25	0.002	290.919	49	42	149	42	843	100.1
High	Q02218	2-oxoglutarate dehydrogenase, mitochondrial OS=Homo sapiens (Human) OX=9606 GN=OGDH PE=1 SV=3	OGDH	0.002	289.628	48	42	145	42	1023	115.9
High	O14617	AP-3 complex subunit delta-1 OS=Homo sapiens (Human) OX=9606 GN=AP3D1 PE=1 SV=1	AP3D1	0.002	286.175	40	42	150	42	1153	130.1
High	Q9UGP8	Translocation protein SEC63 homolog OS=Homo sapiens (Human) OX=9606 GN=SEC63 PE=1 SV=2	SEC63	0.002	281.252	53	42	135	42	760	87.9
High	Q12931	Heat shock protein 75 kDa, mitochondrial OS=Homo sapiens (Human) OX=9606 GN=TRAP1 PE=1 SV=3	TRAP1	0.002	280.663	61	42	147	42	704	80.1
High	Q9Y2A7	Nck-associated protein 1 OS=Homo sapiens (Human) OX=9606 GN=NCKAP1 PE=1 SV=1	NCKAP1	0.002	280.296	36	42	152	42	1128	128.7
High	P06737	Glycogen phosphorylase, liver form OS=Homo sapiens (Human) OX=9606 GN=PYGL PE=1 SV=4	PYGL	0.002	277.991	56	42	148	42	847	97.1
High	Q86V48	Leucine zipper protein 1 OS=Homo sapiens (Human) OX=9606 GN=LUZP1 PE=1 SV=2	LUZP1	0.002	267.668	44	42	137	42	1076	120.2
High	Q86VM9	Zinc finger CCCH domain-containing protein 18 OS=Homo sapiens (Human) OX=9606 GN=ZC3H18 PE=1 SV=2	ZC3H18	0.002	267.18	53	42	109	42	953	106.3
High	O00291	Huntingtin-interacting protein 1 OS=Homo sapiens (Human) OX=9606 GN=HIP1 PE=1 SV=5	HIP1	0.001	247.024	43	42	125	42	1037	116.1
High	O14981	TATA-binding protein-associated factor 172 OS=Homo sapiens (Human) OX=9606 GN=BTAF1 PE=1 SV=2	BTAF1	0.001	246.622	35	42	100	42	1849	206.8
High	O75400	Pre-mRNA-processing factor 40 homolog A OS=Homo sapiens (Human) OX=9606 GN=PRPF40A PE=1 SV=2	PRPF40A	0.001	241.733	48	42	112	42	957	108.7
High	O94776	Metastasis-associated protein MTA2 OS=Homo sapiens (Human) OX=9606 GN=MTA2 PE=1 SV=1	MTA2	0.001	241.61	56	42	149	42	668	75
High	Q9Y4F1	FERM, ARHGEF and pleckstrin domain-containing protein 1 OS=Homo sapiens (Human) OX=9606 GN=FARP1 PE=1 SV=1	FARP1	0.001	236.32	49	42	114	42	1045	118.6
High	O94874	E3 UFM1-protein ligase 1 OS=Homo sapiens (Human) OX=9606 GN=UFL1 PE=1 SV=2	UFL1	0.001	231.623	55	42	101	42	794	89.5
High	Q96A65	Exocyst complex component 4 OS=Homo sapiens (Human) OX=9606 GN=EXOC4 PE=1 SV=1	EXOC4	0.001	229.525	45	42	115	42	974	110.4
High	P02545	Prelamin-A/C OS=Homo sapiens (Human) OX=9606 GN=LMNA PE=1 SV=1	LMNA	0.001	227.79	61	42	109	42	664	74.1
High	Q14562	ATP-dependent RNA helicase DHX8 OS=Homo sapiens (Human) OX=9606 GN=DHX8 PE=1 SV=1	DHX8	0.001	224.2	43	42	84	42	1220	139.2
High	P24821	Tenascin OS=Homo sapiens (Human) OX=9606 GN=TNC PE=1 SV=3	TNC	0.001	218.023	30	42	67	42	2201	240.7
High	Q9BZ95	Histone-lysine N-methyltransferase NSD3 OS=Homo sapiens (Human) OX=9606 GN=NSD3 PE=1 SV=1	NSD3	0.001	166.812	33	42	66	42	1437	161.5
High	Q13263	Transcription intermediary factor 1-beta OS=Homo sapiens (Human) OX=9606 GN=TRIM28 PE=1 SV=5	TRIM28	0.006	487.709	70	41	478	41	835	88.5
High	P55884	Eukaryotic translation initiation factor 3 subunit B OS=Homo sapiens (Human) OX=9606 GN=EIF3B PE=1 SV=3	EIF3B	0.004	411.144	58	41	281	41	814	92.4
High	P26639	Threonine--tRNA ligase 1, cytoplasmic OS=Homo sapiens (Human) OX=9606 GN=TARS1 PE=1 SV=3	TARS1	0.003	388.743	56	41	273	41	723	83.4
High	O00429	Dynamin-1-like protein OS=Homo sapiens (Human) OX=9606 GN=DNM1L PE=1 SV=2	DNM1L	0.003	365.695	64	41	186	41	736	81.8
High	P56192	Methionine--tRNA ligase, cytoplasmic OS=Homo sapiens (Human) OX=9606 GN=MARS1 PE=1 SV=2	MARS1	0.003	359.526	54	41	221	41	900	101.1
High	O75534	Cold shock domain-containing protein E1 OS=Homo sapiens (Human) OX=9606 GN=CSDE1 PE=1 SV=2	CSDE1	0.002	342.701	52	41	214	41	798	88.8
High	P42285	Exosome RNA helicase MTR4 OS=Homo sapiens (Human) OX=9606 GN=MTREX PE=1 SV=3	MTREX	0.002	338.418	40	41	175	41	1042	117.7
High	P17480	Nucleolar transcription factor 1 OS=Homo sapiens (Human) OX=9606 GN=UBTF PE=1 SV=1	UBTF	0.002	288.956	45	41	181	41	764	89.4
High	O43847	Nardilysin OS=Homo sapiens (Human) OX=9606 GN=NRDC PE=1 SV=3	NRDC	0.002	285.324	34	41	153	41	1151	131.6
High	Q9BZE4	Nucleolar GTP-binding protein 1 OS=Homo sapiens (Human) OX=9606 GN=GTPBP4 PE=1 SV=3	GTPBP4	0.002	280.937	59	41	132	41	634	73.9
High	Q9HC35	Echinoderm microtubule-associated protein-like 4 OS=Homo sapiens (Human) OX=9606 GN=EML4 PE=1 SV=3	EML4	0.002	278.662	50	41	163	41	981	108.8
High	O95785	Protein Wiz OS=Homo sapiens (Human) OX=9606 GN=WIZ PE=1 SV=2	WIZ	0.002	271.625	31	41	114	41	1651	178.6
High	P11498	Pyruvate carboxylase, mitochondrial OS=Homo sapiens (Human) OX=9606 GN=PC PE=1 SV=2	PC	0.002	266.741	40	41	122	41	1178	129.6
High	Q15042	Rab3 GTPase-activating protein catalytic subunit OS=Homo sapiens (Human) OX=9606 GN=RAB3GAP1 PE=1 SV=3	RAB3GAP1	0.001	259.574	49	41	105	41	981	110.5
High	Q9Y4C1	Lysine-specific demethylase 3A OS=Homo sapiens (Human) OX=9606 GN=KDM3A PE=1 SV=4	KDM3A	0.001	246.088	40	41	93	41	1321	147.2
High	O95235	Kinesin-like protein KIF20A OS=Homo sapiens (Human) OX=9606 GN=KIF20A PE=1 SV=1	KIF20A	0.001	240.618	57	41	87	41	890	100.2
High	Q99590	Protein SCAF11 OS=Homo sapiens (Human) OX=9606 GN=SCAF11 PE=1 SV=2	SCAF11	0.001	229.791	35	41	100	41	1463	164.6
High	Q8IY37	Probable ATP-dependent RNA helicase DHX37 OS=Homo sapiens (Human) OX=9606 GN=DHX37 PE=1 SV=1	DHX37	0.001	229.579	43	41	106	41	1157	129.5
High	Q8IYB7	DIS3-like exonuclease 2 OS=Homo sapiens (Human) OX=9606 GN=DIS3L2 PE=1 SV=4	DIS3L2	0.001	225.186	50	41	91	41	885	99.2
High	Q9UBB9	Tuftelin-interacting protein 11 OS=Homo sapiens (Human) OX=9606 GN=TFIP11 PE=1 SV=1	TFIP11	0.001	223.695	52	41	99	41	837	96.8
High	P42695	Condensin-2 complex subunit D3 OS=Homo sapiens (Human) OX=9606 GN=NCAPD3 PE=1 SV=2	NCAPD3	0.001	213.725	32	41	77	41	1498	168.8
High	O60244	Mediator of RNA polymerase II transcription subunit 14 OS=Homo sapiens (Human) OX=9606 GN=MED14 PE=1 SV=2	MED14	0.001	212.606	35	41	80	41	1454	160.5
High	Q9ULW0	Targeting protein for Xklp2 OS=Homo sapiens (Human) OX=9606 GN=TPX2 PE=1 SV=2	TPX2	0.001	211.111	46	41	87	41	747	85.6
High	Q86VI3	Ras GTPase-activating-like protein IQGAP3 OS=Homo sapiens (Human) OX=9606 GN=IQGAP3 PE=1 SV=2	IQGAP3	0.001	210.255	33	41	81	41	1631	184.6
High	Q96T37	RNA-binding protein 15 OS=Homo sapiens (Human) OX=9606 GN=RBM15 PE=1 SV=2	RBM15	0.001	207.45	45	41	94	41	977	107.1
High	Q14C86	GTPase-activating protein and VPS9 domain-containing protein 1 OS=Homo sapiens (Human) OX=9606 GN=GAPVD1 PE=1 SV=2	GAPVD1	0.001	206.879	35	41	82	41	1478	164.9
High	Q9UPW5	Cytosolic carboxypeptidase 1 OS=Homo sapiens (Human) OX=9606 GN=AGTPBP1 PE=1 SV=3	AGTPBP1	0.001	205.162	42	41	71	41	1226	138.4
High	Q8IWV8	E3 ubiquitin-protein ligase UBR2 OS=Homo sapiens (Human) OX=9606 GN=UBR2 PE=1 SV=1	UBR2	0.001	198.9	28	41	78	41	1755	200.4
High	Q4VCS5	Angiomotin OS=Homo sapiens (Human) OX=9606 GN=AMOT PE=1 SV=1	AMOT	0.001	195.563	47	41	85	41	1084	118
High	Q9NQW6	Anillin OS=Homo sapiens (Human) OX=9606 GN=ANLN PE=1 SV=2	ANLN	0.001	193.676	37	41	72	41	1124	124.1
High	Q5VZ89	DENN domain-containing protein 4C OS=Homo sapiens (Human) OX=9606 GN=DENND4C PE=1 SV=3	DENND4C	0.001	187.022	30	41	67	41	1909	212.6
High	Q9ULI0	ATPase family AAA domain-containing protein 2B OS=Homo sapiens (Human) OX=9606 GN=ATAD2B PE=1 SV=3	ATAD2B	0.001	174.082	33	41	73	41	1458	164.8
High	P21675	Transcription initiation factor TFIID subunit 1 OS=Homo sapiens (Human) OX=9606 GN=TAF1 PE=1 SV=2	TAF1	0.001	168.061	31	41	69	41	1872	212.5
High	Q68DK2	Zinc finger FYVE domain-containing protein 26 OS=Homo sapiens (Human) OX=9606 GN=ZFYVE26 PE=1 SV=3	ZFYVE26	0.001	167.699	20	41	77	41	2539	284.4
High	O60229	Kalirin OS=Homo sapiens (Human) OX=9606 GN=KALRN PE=1 SV=3	KALRN	0.001	160.3	20	41	59	41	2986	340
High	Q8TF72	Protein Shroom3 OS=Homo sapiens (Human) OX=9606 GN=SHROOM3 PE=1 SV=2	SHROOM3	0.001	150.86	26	41	99	41	1996	216.7
High	Q5T5P2	Sickle tail protein homolog OS=Homo sapiens (Human) OX=9606 GN=KIAA1217 PE=1 SV=2	KIAA1217	0.001	145.56	25	41	65	41	1943	214
High	P13645	Keratin, type I cytoskeletal 10 OS=Homo sapiens (Human) OX=9606 GN=KRT10 PE=1 SV=6	KRT10	0.009	555.144	63	40	612	40	584	58.8
High	P10809	60 kDa heat shock protein, mitochondrial OS=Homo sapiens (Human) OX=9606 GN=HSPD1 PE=1 SV=2	HSPD1	0.006	476.468	77	40	502	40	573	61
High	P50990	T-complex protein 1 subunit theta OS=Homo sapiens (Human) OX=9606 GN=CCT8 PE=1 SV=4	CCT8	0.004	439.86	72	40	513	40	548	59.6
High	Q99460	26S proteasome non-ATPase regulatory subunit 1 OS=Homo sapiens (Human) OX=9606 GN=PSMD1 PE=1 SV=2	PSMD1	0.004	438.848	49	40	263	40	953	105.8
High	P07237	Protein disulfide-isomerase OS=Homo sapiens (Human) OX=9606 GN=P4HB PE=1 SV=3	P4HB	0.004	419.333	71	40	349	40	508	57.1
High	Q9H0D6	5'-3' exoribonuclease 2 OS=Homo sapiens (Human) OX=9606 GN=XRN2 PE=1 SV=1	XRN2	0.004	417.792	45	40	223	40	950	108.5
High	Q99798	Aconitate hydratase, mitochondrial OS=Homo sapiens (Human) OX=9606 GN=ACO2 PE=1 SV=2	ACO2	0.003	396.736	64	40	239	40	780	85.4
High	P25705	ATP synthase subunit alpha, mitochondrial OS=Homo sapiens (Human) OX=9606 GN=ATP5F1A PE=1 SV=1	ATP5F1A	0.003	396.487	71	40	562	40	553	59.7
High	P40939	Trifunctional enzyme subunit alpha, mitochondrial OS=Homo sapiens (Human) OX=9606 GN=HADHA PE=1 SV=2	HADHA	0.003	376.97	60	40	207	40	763	82.9
High	O60502	Protein O-GlcNAcase OS=Homo sapiens (Human) OX=9606 GN=OGA PE=1 SV=2	OGA	0.002	345.164	55	40	164	40	916	102.8
High	Q13616	Cullin-1 OS=Homo sapiens (Human) OX=9606 GN=CUL1 PE=1 SV=2	CUL1	0.002	333.488	51	40	178	40	776	89.6
High	P51784	Ubiquitin carboxyl-terminal hydrolase 11 OS=Homo sapiens (Human) OX=9606 GN=USP11 PE=1 SV=3	USP11	0.002	307.547	52	40	136	40	963	109.7
High	Q9UBF2	Coatomer subunit gamma-2 OS=Homo sapiens (Human) OX=9606 GN=COPG2 PE=1 SV=1	COPG2	0.002	301.03	57	40	137	40	871	97.6
High	Q2VWP7	Protogenin OS=Homo sapiens (Human) OX=9606 GN=PRTG PE=2 SV=1	PRTG	0.002	300.859	51	40	154	40	1150	127
High	Q8TDZ2	[F-actin]-monooxygenase MICAL1 OS=Homo sapiens (Human) OX=9606 GN=MICAL1 PE=1 SV=2	MICAL1	0.002	288.177	42	40	162	40	1067	117.8
High	Q96KR1	Zinc finger RNA-binding protein OS=Homo sapiens (Human) OX=9606 GN=ZFR PE=1 SV=2	ZFR	0.002	268.367	40	40	147	40	1074	116.9
High	Q9BPX3	Condensin complex subunit 3 OS=Homo sapiens (Human) OX=9606 GN=NCAPG PE=1 SV=1	NCAPG	0.001	266.353	42	40	138	40	1015	114.3
High	Q9NX02	NACHT, LRR and PYD domains-containing protein 2 OS=Homo sapiens (Human) OX=9606 GN=NLRP2 PE=1 SV=1	NLRP2	0.001	252.05	40	40	113	40	1062	120.4
High	Q02790	Peptidyl-prolyl cis-trans isomerase FKBP4 OS=Homo sapiens (Human) OX=9606 GN=FKBP4 PE=1 SV=3	FKBP4	0.001	248.913	74	40	195	40	459	51.8
High	Q9H2U1	ATP-dependent DNA/RNA helicase DHX36 OS=Homo sapiens (Human) OX=9606 GN=DHX36 PE=1 SV=2	DHX36	0.001	242.283	45	40	105	40	1008	114.7
High	Q5JSH3	WD repeat-containing protein 44 OS=Homo sapiens (Human) OX=9606 GN=WDR44 PE=1 SV=1	WDR44	0.001	233.979	48	40	92	40	913	101.3
High	Q96EK7	Constitutive coactivator of peroxisome proliferator-activated receptor gamma OS=Homo sapiens (Human) OX=9606 GN=FAM120B PE=1 SV=1	FAM120B	0.001	232.032	45	40	89	40	910	103.7
High	Q15047	Histone-lysine N-methyltransferase SETDB1 OS=Homo sapiens (Human) OX=9606 GN=SETDB1 PE=1 SV=1	SETDB1	0.001	227.109	39	40	96	40	1291	143.1
High	O14727	Apoptotic protease-activating factor 1 OS=Homo sapiens (Human) OX=9606 GN=APAF1 PE=1 SV=2	APAF1	0.001	215.367	36	40	88	40	1248	141.7
High	Q5VW36	Focadhesin OS=Homo sapiens (Human) OX=9606 GN=FOCAD PE=1 SV=1	FOCAD	0.001	215.336	26	40	96	40	1801	199.9
High	Q96K83	Zinc finger protein 521 OS=Homo sapiens (Human) OX=9606 GN=ZNF521 PE=1 SV=1	ZNF521	0.001	213.977	41	40	109	40	1311	147.8
High	Q9UHB7	AF4/FMR2 family member 4 OS=Homo sapiens (Human) OX=9606 GN=AFF4 PE=1 SV=1	AFF4	0.001	206.296	44	40	80	40	1163	127.4
High	O94822	E3 ubiquitin-protein ligase listerin OS=Homo sapiens (Human) OX=9606 GN=LTN1 PE=1 SV=6	LTN1	0.001	203.454	24	40	84	40	1766	200.4
High	Q96JH7	Deubiquitinating protein VCIP135 OS=Homo sapiens (Human) OX=9606 GN=VCPIP1 PE=1 SV=2	VCPIP1	0.001	200.2	41	40	75	40	1222	134.2
High	O15047	Histone-lysine N-methyltransferase SETD1A OS=Homo sapiens (Human) OX=9606 GN=SETD1A PE=1 SV=3	SETD1A	0.001	197.45	34	40	77	40	1707	185.9
High	Q8TCU6	Phosphatidylinositol 3,4,5-trisphosphate-dependent Rac exchanger 1 protein OS=Homo sapiens (Human) OX=9606 GN=PREX1 PE=1 SV=3	PREX1	0.001	195.64	32	40	69	40	1659	186.1
High	Q9BXF3	Cat eye syndrome critical region protein 2 OS=Homo sapiens (Human) OX=9606 GN=CECR2 PE=1 SV=2	CECR2	0.001	194.734	31	40	106	40	1484	164.1
High	Q9P273	Teneurin-3 OS=Homo sapiens (Human) OX=9606 GN=TENM3 PE=1 SV=3	TENM3	0.001	192.747	22	40	73	40	2699	300.8
High	Q92794	Histone acetyltransferase KAT6A OS=Homo sapiens (Human) OX=9606 GN=KAT6A PE=1 SV=2	KAT6A	0.001	192.378	28	40	72	40	2004	224.9
High	Q4LE39	AT-rich interactive domain-containing protein 4B OS=Homo sapiens (Human) OX=9606 GN=ARID4B PE=1 SV=2	ARID4B	0.001	189.891	38	40	71	40	1312	147.7
High	Q9UNY4	Transcription termination factor 2 OS=Homo sapiens (Human) OX=9606 GN=TTF2 PE=1 SV=2	TTF2	0.001	186.47	39	40	77	40	1162	129.5
High	Q96PQ0	VPS10 domain-containing receptor SorCS2 OS=Homo sapiens (Human) OX=9606 GN=SORCS2 PE=1 SV=3	SORCS2	0.001	183.096	50	40	72	40	1159	128.1
High	O75665	Oral-facial-digital syndrome 1 protein OS=Homo sapiens (Human) OX=9606 GN=OFD1 PE=1 SV=1	OFD1	0.001	179.399	44	40	71	40	1012	116.6
High	Q9UIF8	Bromodomain adjacent to zinc finger domain protein 2B OS=Homo sapiens (Human) OX=9606 GN=BAZ2B PE=1 SV=3	BAZ2B	0.001	166.516	30	40	62	40	2168	240.3
High	Q5VWN6	Protein TASOR 2 OS=Homo sapiens (Human) OX=9606 GN=TASOR2 PE=1 SV=1	TASOR2	0.001	163.63	20	40	80	40	2430	268.7
High	Q9BYP7	Serine/threonine-protein kinase WNK3 OS=Homo sapiens (Human) OX=9606 GN=WNK3 PE=1 SV=3	WNK3	0.001	160.023	31	40	64	40	1800	198.3
High	O60292	Signal-induced proliferation-associated 1-like protein 3 OS=Homo sapiens (Human) OX=9606 GN=SIPA1L3 PE=1 SV=3	SIPA1L3	0.001	140.732	30	40	51	40	1781	194.5
High	P07900	Heat shock protein HSP 90-alpha OS=Homo sapiens (Human) OX=9606 GN=HSP90AA1 PE=1 SV=5	HSP90AA1	0.008	529.728	48	39	728	39	732	84.6
High	O43390	Heterogeneous nuclear ribonucleoprotein R OS=Homo sapiens (Human) OX=9606 GN=HNRNPR PE=1 SV=1	HNRNPR	0.005	457.873	64	39	460	39	633	70.9
High	P50395	Rab GDP dissociation inhibitor beta OS=Homo sapiens (Human) OX=9606 GN=GDI2 PE=1 SV=2	GDI2	0.004	414.66	73	39	474	39	445	50.6
High	P31939	Bifunctional purine biosynthesis protein ATIC OS=Homo sapiens (Human) OX=9606 GN=ATIC PE=1 SV=3	ATIC	0.003	382.77	81	39	297	39	592	64.6
High	O75475	PC4 and SFRS1-interacting protein OS=Homo sapiens (Human) OX=9606 GN=PSIP1 PE=1 SV=1	PSIP1	0.003	373.695	64	39	253	39	530	60.1
High	P54886	Delta-1-pyrroline-5-carboxylate synthase OS=Homo sapiens (Human) OX=9606 GN=ALDH18A1 PE=1 SV=2	ALDH18A1	0.003	373.073	52	39	261	39	795	87.2
High	P08237	ATP-dependent 6-phosphofructokinase, muscle type OS=Homo sapiens (Human) OX=9606 GN=PFKM PE=1 SV=2	PFKM	0.003	361.165	56	39	252	39	780	85.1
High	P18858	DNA ligase 1 OS=Homo sapiens (Human) OX=9606 GN=LIG1 PE=1 SV=1	LIG1	0.002	339.392	49	39	130	39	919	101.7
High	P14868	Aspartate--tRNA ligase, cytoplasmic OS=Homo sapiens (Human) OX=9606 GN=DARS1 PE=1 SV=2	DARS1	0.002	339.018	75	39	255	39	501	57.1
High	Q15155	Nodal modulator 1 OS=Homo sapiens (Human) OX=9606 GN=NOMO1 PE=1 SV=5	NOMO1	0.002	322.465	41	39	161	39	1222	134.2
High	P43304	Glycerol-3-phosphate dehydrogenase, mitochondrial OS=Homo sapiens (Human) OX=9606 GN=GPD2 PE=1 SV=3	GPD2	0.002	294.277	68	39	135	39	727	80.8
High	Q96QK1	Vacuolar protein sorting-associated protein 35 OS=Homo sapiens (Human) OX=9606 GN=VPS35 PE=1 SV=2	VPS35	0.002	283.764	54	39	148	39	796	91.6
High	Q15477	Helicase SKI2W OS=Homo sapiens (Human) OX=9606 GN=SKIV2L PE=1 SV=3	SKIV2L	0.002	279.358	39	39	145	39	1246	137.7
High	O43264	Centromere/kinetochore protein zw10 homolog OS=Homo sapiens (Human) OX=9606 GN=ZW10 PE=1 SV=3	ZW10	0.001	266.329	61	39	106	39	779	88.8
High	Q9H3U1	Protein unc-45 homolog A OS=Homo sapiens (Human) OX=9606 GN=UNC45A PE=1 SV=1	UNC45A	0.001	254.439	47	39	101	39	944	103
High	O95696	Bromodomain-containing protein 1 OS=Homo sapiens (Human) OX=9606 GN=BRD1 PE=1 SV=1	BRD1	0.001	228.809	46	39	94	39	1058	119.4
High	Q86WJ1	Chromodomain-helicase-DNA-binding protein 1-like OS=Homo sapiens (Human) OX=9606 GN=CHD1L PE=1 SV=3	CHD1L	0.001	221.787	40	39	91	39	897	100.9
High	Q93034	Cullin-5 OS=Homo sapiens (Human) OX=9606 GN=CUL5 PE=1 SV=4	CUL5	0.001	219.147	51	39	100	39	780	90.9
High	Q9P253	Vacuolar protein sorting-associated protein 18 homolog OS=Homo sapiens (Human) OX=9606 GN=VPS18 PE=1 SV=2	VPS18	0.001	218.004	45	39	99	39	973	110.1
High	Q9Y3P9	Rab GTPase-activating protein 1 OS=Homo sapiens (Human) OX=9606 GN=RABGAP1 PE=1 SV=3	RABGAP1	0.001	217.502	36	39	91	39	1069	121.7
High	Q96KP1	Exocyst complex component 2 OS=Homo sapiens (Human) OX=9606 GN=EXOC2 PE=1 SV=1	EXOC2	0.001	213.125	51	39	93	39	924	104
High	O15164	Transcription intermediary factor 1-alpha OS=Homo sapiens (Human) OX=9606 GN=TRIM24 PE=1 SV=3	TRIM24	0.001	212.313	46	39	100	39	1050	116.8
High	Q9BZJ0	Crooked neck-like protein 1 OS=Homo sapiens (Human) OX=9606 GN=CRNKL1 PE=1 SV=4	CRNKL1	0.001	209.708	42	39	112	39	848	100.4
High	Q14191	Werner syndrome ATP-dependent helicase OS=Homo sapiens (Human) OX=9606 GN=WRN PE=1 SV=2	WRN	0.001	204.632	34	39	77	39	1432	162.4
High	O15014	Zinc finger protein 609 OS=Homo sapiens (Human) OX=9606 GN=ZNF609 PE=1 SV=2	ZNF609	0.001	197.444	41	39	70	39	1411	151.1
High	Q8WX93	Palladin OS=Homo sapiens (Human) OX=9606 GN=PALLD PE=1 SV=3	PALLD	0.001	193.844	36	39	104	39	1383	150.5	RG
High	O00443	Phosphatidylinositol 4-phosphate 3-kinase C2 domain-containing subunit alpha OS=Homo sapiens (Human) OX=9606 GN=PIK3C2A PE=1 SV=2	PIK3C2A	0.001	188.273	24	39	85	39	1686	190.6
High	Q69YQ0	Cytospin-A OS=Homo sapiens (Human) OX=9606 GN=SPECC1L PE=1 SV=2	SPECC1L	0.001	187.217	35	39	71	39	1117	124.5
High	Q9UDY2	Tight junction protein ZO-2 OS=Homo sapiens (Human) OX=9606 GN=TJP2 PE=1 SV=2	TJP2	0.001	186.011	37	39	80	39	1190	133.9
High	Q05397	Focal adhesion kinase 1 OS=Homo sapiens (Human) OX=9606 GN=PTK2 PE=1 SV=2	PTK2	0.001	176.618	42	39	82	39	1052	119.2
High	O60566	Mitotic checkpoint serine/threonine-protein kinase BUB1 beta OS=Homo sapiens (Human) OX=9606 GN=BUB1B PE=1 SV=3	BUB1B	0.001	166.289	44	39	64	39	1050	119.5
High	Q8N1G0	Zinc finger protein 687 OS=Homo sapiens (Human) OX=9606 GN=ZNF687 PE=1 SV=1	ZNF687	0.001	159.895	50	39	60	39	1237	129.4
High	Q8IWT3	Cullin-9 OS=Homo sapiens (Human) OX=9606 GN=CUL9 PE=1 SV=2	CUL9	0.001	159.215	20	39	66	39	2517	281
High	Q8N1I0	Dedicator of cytokinesis protein 4 OS=Homo sapiens (Human) OX=9606 GN=DOCK4 PE=1 SV=3	DOCK4	0.001	153.195	23	39	61	39	1966	225.1
High	Q96QE3	ATPase family AAA domain-containing protein 5 OS=Homo sapiens (Human) OX=9606 GN=ATAD5 PE=1 SV=4	ATAD5	0.001	148.295	26	39	56	39	1844	207.4
High	Q9UPQ9	Trinucleotide repeat-containing gene 6B protein OS=Homo sapiens (Human) OX=9606 GN=TNRC6B PE=1 SV=4	TNRC6B	0.001	141.284	35	39	52	39	1833	193.9
High	Q9NQX4	Unconventional myosin-Vc OS=Homo sapiens (Human) OX=9606 GN=MYO5C PE=1 SV=2	MYO5C	0.001	134.226	22	39	80	39	1742	202.7
High	Q9UKL3	CASP8-associated protein 2 OS=Homo sapiens (Human) OX=9606 GN=CASP8AP2 PE=1 SV=1	CASP8AP2	0.001	127.506	25	39	60	39	1982	222.5
High	A6H8Y1	Transcription factor TFIIIB component B'' homolog OS=Homo sapiens (Human) OX=9606 GN=BDP1 PE=1 SV=3	BDP1	0.001	120.053	22	39	56	39	2624	293.7
High	Q5T011	KICSTOR complex protein SZT2 OS=Homo sapiens (Human) OX=9606 GN=SZT2 PE=1 SV=3	SZT2	0.001	119.616	18	39	49	39	3432	377.8
High	Q16643	Drebrin OS=Homo sapiens (Human) OX=9606 GN=DBN1 PE=1 SV=4	DBN1	0.004	404.902	64	38	263	38	649	71.4
High	P38646	Stress-70 protein, mitochondrial OS=Homo sapiens (Human) OX=9606 GN=HSPA9 PE=1 SV=2	HSPA9	0.003	385.295	62	38	282	38	679	73.6
High	Q06210	Glutamine--fructose-6-phosphate aminotransferase [isomerizing] 1 OS=Homo sapiens (Human) OX=9606 GN=GFPT1 PE=1 SV=3	GFPT1	0.003	376.133	58	38	232	38	699	78.8
High	Q14684	Ribosomal RNA processing protein 1 homolog B OS=Homo sapiens (Human) OX=9606 GN=RRP1B PE=1 SV=3	RRP1B	0.003	366.738	63	38	193	38	758	84.4
High	Q2Q1W2	E3 ubiquitin-protein ligase TRIM71 OS=Homo sapiens (Human) OX=9606 GN=TRIM71 PE=1 SV=1	TRIM71	0.002	330.774	52	38	176	38	868	93.3
High	Q13330	Metastasis-associated protein MTA1 OS=Homo sapiens (Human) OX=9606 GN=MTA1 PE=1 SV=2	MTA1	0.002	330.194	58	38	181	38	715	80.7
High	Q9NSE4	Isoleucine--tRNA ligase, mitochondrial OS=Homo sapiens (Human) OX=9606 GN=IARS2 PE=1 SV=2	IARS2	0.002	292.493	40	38	154	38	1012	113.7
High	P28331	NADH-ubiquinone oxidoreductase 75 kDa subunit, mitochondrial OS=Homo sapiens (Human) OX=9606 GN=NDUFS1 PE=1 SV=3	NDUFS1	0.002	289.826	74	38	143	38	727	79.4
High	Q6PJT7	Zinc finger CCCH domain-containing protein 14 OS=Homo sapiens (Human) OX=9606 GN=ZC3H14 PE=1 SV=1	ZC3H14	0.002	282.16	64	38	134	38	736	82.8
High	P20936	Ras GTPase-activating protein 1 OS=Homo sapiens (Human) OX=9606 GN=RASA1 PE=1 SV=1	RASA1	0.001	252.163	41	38	112	38	1047	116.3
High	Q5H9R7	Serine/threonine-protein phosphatase 6 regulatory subunit 3 OS=Homo sapiens (Human) OX=9606 GN=PPP6R3 PE=1 SV=2	PPP6R3	0.001	248.598	52	38	113	38	873	97.6
High	Q14692	Ribosome biogenesis protein BMS1 homolog OS=Homo sapiens (Human) OX=9606 GN=BMS1 PE=1 SV=1	BMS1	0.001	234.871	37	38	99	38	1282	145.7
High	O94979	Protein transport protein Sec31A OS=Homo sapiens (Human) OX=9606 GN=SEC31A PE=1 SV=3	SEC31A	0.001	233.971	41	38	125	38	1220	132.9
High	P20585	DNA mismatch repair protein Msh3 OS=Homo sapiens (Human) OX=9606 GN=MSH3 PE=1 SV=4	MSH3	0.001	231.153	39	38	89	38	1137	127.3
High	Q7Z5K2	Wings apart-like protein homolog OS=Homo sapiens (Human) OX=9606 GN=WAPL PE=1 SV=1	WAPL	0.001	220.55	42	38	76	38	1190	132.9
High	Q96GQ7	Probable ATP-dependent RNA helicase DDX27 OS=Homo sapiens (Human) OX=9606 GN=DDX27 PE=1 SV=2	DDX27	0.001	219.02	41	38	115	38	796	89.8
High	Q9NXF1	Testis-expressed protein 10 OS=Homo sapiens (Human) OX=9606 GN=TEX10 PE=1 SV=2	TEX10	0.001	215.366	40	38	91	38	929	105.6
High	Q9HAU0	Pleckstrin homology domain-containing family A member 5 OS=Homo sapiens (Human) OX=9606 GN=PLEKHA5 PE=1 SV=1	PLEKHA5	0.001	205.428	39	38	73	38	1116	127.4
High	Q9UL03	Integrator complex subunit 6 OS=Homo sapiens (Human) OX=9606 GN=INTS6 PE=1 SV=1	INTS6	0.001	202.937	50	38	82	38	887	100.3
High	Q9BXW6	Oxysterol-binding protein-related protein 1 OS=Homo sapiens (Human) OX=9606 GN=OSBPL1A PE=1 SV=2	OSBPL1A	0.001	202.15	43	38	89	38	950	108.4
High	O60524	Nuclear export mediator factor NEMF OS=Homo sapiens (Human) OX=9606 GN=NEMF PE=1 SV=4	NEMF	0.001	197.036	37	38	89	38	1076	122.9
High	Q9P2K8	eIF-2-alpha kinase GCN2 OS=Homo sapiens (Human) OX=9606 GN=EIF2AK4 PE=1 SV=3	EIF2AK4	0.001	195.792	28	38	71	38	1649	186.8
High	Q96CW5	Gamma-tubulin complex component 3 OS=Homo sapiens (Human) OX=9606 GN=TUBGCP3 PE=1 SV=2	TUBGCP3	0.001	194.676	46	38	73	38	907	103.5
High	Q99700	Ataxin-2 OS=Homo sapiens (Human) OX=9606 GN=ATXN2 PE=1 SV=2	ATXN2	0.001	192.833	39	38	74	38	1313	140.2
High	Q96RY7	Intraflagellar transport protein 140 homolog OS=Homo sapiens (Human) OX=9606 GN=IFT140 PE=1 SV=1	IFT140	0.001	192.237	27	38	90	38	1462	165.1
High	Q68CP9	AT-rich interactive domain-containing protein 2 OS=Homo sapiens (Human) OX=9606 GN=ARID2 PE=1 SV=2	ARID2	0.001	190.864	27	38	66	38	1835	197.3
High	Q8IZH2	5'-3' exoribonuclease 1 OS=Homo sapiens (Human) OX=9606 GN=XRN1 PE=1 SV=1	XRN1	0.001	188.181	30	38	74	38	1706	194
High	Q9ULM3	YEATS domain-containing protein 2 OS=Homo sapiens (Human) OX=9606 GN=YEATS2 PE=1 SV=2	YEATS2	0.001	183.829	37	38	72	38	1422	150.7
High	Q9Y2L5	Trafficking protein particle complex subunit 8 OS=Homo sapiens (Human) OX=9606 GN=TRAPPC8 PE=1 SV=2	TRAPPC8	0.001	178.371	31	38	70	38	1435	160.9
High	Q08378	Golgin subfamily A member 3 OS=Homo sapiens (Human) OX=9606 GN=GOLGA3 PE=1 SV=2	GOLGA3	0.001	171.761	26	38	73	38	1498	167.3
High	Q96PC5	Melanoma inhibitory activity protein 2 OS=Homo sapiens (Human) OX=9606 GN=MIA2 PE=1 SV=4	MIA2	0.001	171.103	28	38	68	38	1412	159.7
High	Q6GYQ0	Ral GTPase-activating protein subunit alpha-1 OS=Homo sapiens (Human) OX=9606 GN=RALGAPA1 PE=1 SV=1	RALGAPA1	0.001	170.002	27	38	55	38	2036	229.7
High	Q07889	Son of sevenless homolog 1 OS=Homo sapiens (Human) OX=9606 GN=SOS1 PE=1 SV=1	SOS1	0.001	162.875	29	38	66	38	1333	152.4
High	Q7Z406	Myosin-14 OS=Homo sapiens (Human) OX=9606 GN=MYH14 PE=1 SV=2	MYH14	0.001	159.901	19	38	73	38	1995	227.7
High	Q9BZF9	Uveal autoantigen with coiled-coil domains and ankyrin repeats OS=Homo sapiens (Human) OX=9606 GN=UACA PE=1 SV=2	UACA	0.001	152.795	31	38	59	38	1416	162.4
High	P30414	NK-tumor recognition protein OS=Homo sapiens (Human) OX=9606 GN=NKTR PE=1 SV=2	NKTR	0.001	146.601	29	38	73	38	1462	165.6
High	Q75N90	Fibrillin-3 OS=Homo sapiens (Human) OX=9606 GN=FBN3 PE=2 SV=3	FBN3	0.001	140.485	25	38	59	38	2809	300.1
High	Q96BY7	Autophagy-related protein 2 homolog B OS=Homo sapiens (Human) OX=9606 GN=ATG2B PE=1 SV=5	ATG2B	0.001	133.826	21	38	49	38	2078	232.6
High	Q8TDW7	Protocadherin Fat 3 OS=Homo sapiens (Human) OX=9606 GN=FAT3 PE=2 SV=3	FAT3	0.001	130.941	12	38	50	38	4557	501.7
High	Q9HCK1	DBF4-type zinc finger-containing protein 2 OS=Homo sapiens (Human) OX=9606 GN=ZDBF2 PE=1 SV=3	ZDBF2	0.001	129.533	25	38	69	38	2354	265.5
High	P78371	T-complex protein 1 subunit beta OS=Homo sapiens (Human) OX=9606 GN=CCT2 PE=1 SV=4	CCT2	0.004	411.459	72	37	308	37	535	57.5
High	P35222	Catenin beta-1 OS=Homo sapiens (Human) OX=9606 GN=CTNNB1 PE=1 SV=1	CTNNB1	0.004	409.535	52	37	275	37	781	85.4
High	P50991	T-complex protein 1 subunit delta OS=Homo sapiens (Human) OX=9606 GN=CCT4 PE=1 SV=4	CCT4	0.004	405.185	68	37	276	37	539	57.9
High	O00567	Nucleolar protein 56 OS=Homo sapiens (Human) OX=9606 GN=NOP56 PE=1 SV=4	NOP56	0.003	389.77	65	37	237	37	594	66
High	O43242	26S proteasome non-ATPase regulatory subunit 3 OS=Homo sapiens (Human) OX=9606 GN=PSMD3 PE=1 SV=2	PSMD3	0.003	359.337	62	37	209	37	534	60.9
High	Q15046	Lysine--tRNA ligase OS=Homo sapiens (Human) OX=9606 GN=KARS1 PE=1 SV=3	KARS1	0.002	346.92	60	37	237	37	597	68
High	P47897	Glutamine--tRNA ligase OS=Homo sapiens (Human) OX=9606 GN=QARS1 PE=1 SV=1	QARS1	0.002	307.299	52	37	211	37	775	87.7
High	P36776	Lon protease homolog, mitochondrial OS=Homo sapiens (Human) OX=9606 GN=LONP1 PE=1 SV=2	LONP1	0.002	306.194	45	37	128	37	959	106.4
High	Q6IN85	Serine/threonine-protein phosphatase 4 regulatory subunit 3A OS=Homo sapiens (Human) OX=9606 GN=PPP4R3A PE=1 SV=1	PPP4R3A	0.002	296.946	52	37	123	37	833	95.3
High	Q9Y263	Phospholipase A-2-activating protein OS=Homo sapiens (Human) OX=9606 GN=PLAA PE=1 SV=2	PLAA	0.002	290.436	53	37	148	37	795	87.1
High	O60763	General vesicular transport factor p115 OS=Homo sapiens (Human) OX=9606 GN=USO1 PE=1 SV=2	USO1	0.002	288.899	52	37	146	37	962	107.8
High	Q07065	Cytoskeleton-associated protein 4 OS=Homo sapiens (Human) OX=9606 GN=CKAP4 PE=1 SV=2	CKAP4	0.002	275.972	67	37	165	37	602	66
High	Q9BQ39	ATP-dependent RNA helicase DDX50 OS=Homo sapiens (Human) OX=9606 GN=DDX50 PE=1 SV=1	DDX50	0.002	272.943	51	37	120	37	737	82.5
High	O60488	Long-chain-fatty-acid--CoA ligase 4 OS=Homo sapiens (Human) OX=9606 GN=ACSL4 PE=1 SV=2	ACSL4	0.001	262.821	57	37	145	37	711	79.1
High	P07384	Calpain-1 catalytic subunit OS=Homo sapiens (Human) OX=9606 GN=CAPN1 PE=1 SV=1	CAPN1	0.001	255.456	56	37	170	37	714	81.8
High	Q13423	NAD(P) transhydrogenase, mitochondrial OS=Homo sapiens (Human) OX=9606 GN=NNT PE=1 SV=3	NNT	0.001	253.794	36	37	149	37	1086	113.8
High	Q9UHB9	Signal recognition particle subunit SRP68 OS=Homo sapiens (Human) OX=9606 GN=SRP68 PE=1 SV=2	SRP68	0.001	252.633	54	37	113	37	627	70.7
High	P54577	Tyrosine--tRNA ligase, cytoplasmic OS=Homo sapiens (Human) OX=9606 GN=YARS1 PE=1 SV=4	YARS1	0.001	250.836	63	37	163	37	528	59.1
High	Q9BSJ2	Gamma-tubulin complex component 2 OS=Homo sapiens (Human) OX=9606 GN=TUBGCP2 PE=1 SV=2	TUBGCP2	0.001	242.123	50	37	119	37	902	102.5
High	O15381	Nuclear valosin-containing protein-like OS=Homo sapiens (Human) OX=9606 GN=NVL PE=1 SV=1	NVL	0.001	235.986	48	37	89	37	856	95
High	P40222	Alpha-taxilin OS=Homo sapiens (Human) OX=9606 GN=TXLNA PE=1 SV=3	TXLNA	0.001	228.999	64	37	109	37	546	61.9
High	P23378	Glycine dehydrogenase (decarboxylating), mitochondrial OS=Homo sapiens (Human) OX=9606 GN=GLDC PE=1 SV=2	GLDC	0.001	227.705	52	37	89	37	1020	112.7
High	Q9H9B1	Histone-lysine N-methyltransferase EHMT1 OS=Homo sapiens (Human) OX=9606 GN=EHMT1 PE=1 SV=4	EHMT1	0.001	222.716	44	37	86	37	1298	141.4
High	Q5JRX3	Presequence protease, mitochondrial OS=Homo sapiens (Human) OX=9606 GN=PITRM1 PE=1 SV=3	PITRM1	0.001	216.829	40	37	86	37	1037	117.3
High	Q92888	Rho guanine nucleotide exchange factor 1 OS=Homo sapiens (Human) OX=9606 GN=ARHGEF1 PE=1 SV=2	ARHGEF1	0.001	215.603	47	37	100	37	912	102.4
High	Q2PPJ7	Ral GTPase-activating protein subunit alpha-2 OS=Homo sapiens (Human) OX=9606 GN=RALGAPA2 PE=1 SV=2	RALGAPA2	0.001	213.282	24	37	104	37	1873	210.6
High	Q15398	Disks large-associated protein 5 OS=Homo sapiens (Human) OX=9606 GN=DLGAP5 PE=1 SV=2	DLGAP5	0.001	209.887	47	37	89	37	846	95.1
High	Q01968	Inositol polyphosphate 5-phosphatase OCRL OS=Homo sapiens (Human) OX=9606 GN=OCRL PE=1 SV=3	OCRL	0.001	209.772	40	37	106	37	901	104.1
High	O94966	Ubiquitin carboxyl-terminal hydrolase 19 OS=Homo sapiens (Human) OX=9606 GN=USP19 PE=1 SV=2	USP19	0.001	202.349	43	37	79	37	1318	145.6
High	Q9ULU8	Calcium-dependent secretion activator 1 OS=Homo sapiens (Human) OX=9606 GN=CADPS PE=1 SV=3	CADPS	0.001	199.367	32	37	69	37	1353	152.7
High	Q8N1G2	Cap-specific mRNA (nucleoside-2'-O-)-methyltransferase 1 OS=Homo sapiens (Human) OX=9606 GN=CMTR1 PE=1 SV=1	CMTR1	0.001	190.651	43	37	81	37	835	95.3
High	Q16513	Serine/threonine-protein kinase N2 OS=Homo sapiens (Human) OX=9606 GN=PKN2 PE=1 SV=1	PKN2	0.001	190.548	45	37	73	37	984	112
High	Q9Y4B6	DDB1- and CUL4-associated factor 1 OS=Homo sapiens (Human) OX=9606 GN=DCAF1 PE=1 SV=3	DCAF1	0.001	163.965	28	37	75	37	1507	168.9
High	Q149N8	E3 ubiquitin-protein ligase SHPRH OS=Homo sapiens (Human) OX=9606 GN=SHPRH PE=1 SV=2	SHPRH	0.001	155.258	26	37	60	37	1683	193
High	Q9P2M7	Cingulin OS=Homo sapiens (Human) OX=9606 GN=CGN PE=1 SV=2	CGN	0.001	142.142	30	37	52	37	1197	136.3
High	O15417	Trinucleotide repeat-containing gene 18 protein OS=Homo sapiens (Human) OX=9606 GN=TNRC18 PE=1 SV=3	TNRC18	0.001	137.71	22	37	69	37	2968	314.3
High	Q2TBE0	CWF19-like protein 2 OS=Homo sapiens (Human) OX=9606 GN=CWF19L2 PE=1 SV=4	CWF19L2	0.001	135.367	41	37	47	37	894	103.7
High	Q6ZU65	Ubinuclein-2 OS=Homo sapiens (Human) OX=9606 GN=UBN2 PE=1 SV=2	UBN2	0.001	127.042	37	37	55	37	1347	146
High	Q15233	Non-POU domain-containing octamer-binding protein OS=Homo sapiens (Human) OX=9606 GN=NONO PE=1 SV=4	NONO	0.005	470.746	65	36	693	36	471	54.2
High	P27824	Calnexin OS=Homo sapiens (Human) OX=9606 GN=CANX PE=1 SV=2	CANX	0.005	460.593	47	36	411	36	592	67.5
High	P52209	6-phosphogluconate dehydrogenase, decarboxylating OS=Homo sapiens (Human) OX=9606 GN=PGD PE=1 SV=3	PGD	0.003	359.441	74	36	349	36	483	53.1
High	P51114	Fragile X mental retardation syndrome-related protein 1 OS=Homo sapiens (Human) OX=9606 GN=FXR1 PE=1 SV=3	FXR1	0.002	331.416	53	36	177	36	621	69.7
High	P41250	Glycine--tRNA ligase OS=Homo sapiens (Human) OX=9606 GN=GARS1 PE=1 SV=3	GARS1	0.002	306.823	56	36	188	36	739	83.1
High	P43686	26S proteasome regulatory subunit 6B OS=Homo sapiens (Human) OX=9606 GN=PSMC4 PE=1 SV=2	PSMC4	0.002	303.72	73	36	190	36	418	47.3
High	O43290	U4/U6.U5 tri-snRNP-associated protein 1 OS=Homo sapiens (Human) OX=9606 GN=SART1 PE=1 SV=1	SART1	0.002	282.185	45	36	131	36	800	90.2
High	Q15334	Lethal(2) giant larvae protein homolog 1 OS=Homo sapiens (Human) OX=9606 GN=LLGL1 PE=1 SV=3	LLGL1	0.002	280.076	54	36	165	36	1064	115.3
High	Q13618	Cullin-3 OS=Homo sapiens (Human) OX=9606 GN=CUL3 PE=1 SV=2	CUL3	0.002	277.131	45	36	147	36	768	88.9
High	P22059	Oxysterol-binding protein 1 OS=Homo sapiens (Human) OX=9606 GN=OSBP PE=1 SV=1	OSBP	0.002	275.301	48	36	146	36	807	89.4
High	Q9H9A6	Leucine-rich repeat-containing protein 40 OS=Homo sapiens (Human) OX=9606 GN=LRRC40 PE=1 SV=1	LRRC40	0.002	274.223	71	36	141	36	602	68.2
High	P38159	RNA-binding motif protein, X chromosome OS=Homo sapiens (Human) OX=9606 GN=RBMX PE=1 SV=3	RBMX	0.001	253.95	59	36	356	36	391	42.3
High	P46087	Probable 28S rRNA (cytosine(4447)-C(5))-methyltransferase OS=Homo sapiens (Human) OX=9606 GN=NOP2 PE=1 SV=2	NOP2	0.001	253.057	56	36	126	36	812	89.2
High	Q13308	Inactive tyrosine-protein kinase 7 OS=Homo sapiens (Human) OX=9606 GN=PTK7 PE=1 SV=2	PTK7	0.001	251.686	39	36	147	36	1070	118.3
High	Q96SI9	Spermatid perinuclear RNA-binding protein OS=Homo sapiens (Human) OX=9606 GN=STRBP PE=1 SV=1	STRBP	0.001	245.097	49	36	144	36	672	73.6
High	Q96T88	E3 ubiquitin-protein ligase UHRF1 OS=Homo sapiens (Human) OX=9606 GN=UHRF1 PE=1 SV=1	UHRF1	0.001	242.292	53	36	108	36	793	89.8
High	Q9C0J8	pre-mRNA 3' end processing protein WDR33 OS=Homo sapiens (Human) OX=9606 GN=WDR33 PE=1 SV=2	WDR33	0.001	232.229	36	36	105	36	1336	145.8
High	Q13523	Serine/threonine-protein kinase PRP4 homolog OS=Homo sapiens (Human) OX=9606 GN=PRPF4B PE=1 SV=3	PRPF4B	0.001	218.258	34	36	109	36	1007	116.9
High	Q9H6R4	Nucleolar protein 6 OS=Homo sapiens (Human) OX=9606 GN=NOL6 PE=1 SV=2	NOL6	0.001	216.72	35	36	98	36	1146	127.5
High	Q9Y6D9	Mitotic spindle assembly checkpoint protein MAD1 OS=Homo sapiens (Human) OX=9606 GN=MAD1L1 PE=1 SV=2	MAD1L1	0.001	215.779	52	36	109	36	718	83
High	Q5T8P6	RNA-binding protein 26 OS=Homo sapiens (Human) OX=9606 GN=RBM26 PE=1 SV=3	RBM26	0.001	212.238	36	36	122	36	1007	113.5
High	Q9H4L7	SWI/SNF-related matrix-associated actin-dependent regulator of chromatin subfamily A containing DEAD/H box 1 OS=Homo sapiens (Human) OX=9606 GN=SMARCAD1 PE=1 SV=2	SMARCAD1	0.001	212.068	45	36	94	36	1026	117.3
High	Q13573	SNW domain-containing protein 1 OS=Homo sapiens (Human) OX=9606 GN=SNW1 PE=1 SV=1	SNW1	0.001	212.055	58	36	117	36	536	61.5
High	P35612	Beta-adducin OS=Homo sapiens (Human) OX=9606 GN=ADD2 PE=1 SV=3	ADD2	0.001	208.828	57	36	64	36	726	80.8
High	P07197	Neurofilament medium polypeptide OS=Homo sapiens (Human) OX=9606 GN=NEFM PE=1 SV=3	NEFM	0.001	203.692	36	36	88	36	916	102.4
High	Q6SZW1	NAD(+) hydrolase SARM1 OS=Homo sapiens (Human) OX=9606 GN=SARM1 PE=1 SV=1	SARM1	0.001	202.565	55	36	88	36	724	79.3
High	Q9Y5B0	RNA polymerase II subunit A C-terminal domain phosphatase OS=Homo sapiens (Human) OX=9606 GN=CTDP1 PE=1 SV=3	CTDP1	0.001	198.842	44	36	94	36	961	104.3
High	Q8NEZ3	WD repeat-containing protein 19 OS=Homo sapiens (Human) OX=9606 GN=WDR19 PE=1 SV=2	WDR19	0.001	196.465	32	36	71	36	1342	151.5
High	Q96KG9	N-terminal kinase-like protein OS=Homo sapiens (Human) OX=9606 GN=SCYL1 PE=1 SV=1	SCYL1	0.001	196.313	59	36	96	36	808	89.6
High	Q562E7	WD repeat-containing protein 81 OS=Homo sapiens (Human) OX=9606 GN=WDR81 PE=1 SV=2	WDR81	0.001	194.755	29	36	64	36	1941	211.6
High	Q6WCQ1	Myosin phosphatase Rho-interacting protein OS=Homo sapiens (Human) OX=9606 GN=MPRIP PE=1 SV=3	MPRIP	0.001	192.57	44	36	79	36	1025	116.5
High	Q96P48	Arf-GAP with Rho-GAP domain, ANK repeat and PH domain-containing protein 1 OS=Homo sapiens (Human) OX=9606 GN=ARAP1 PE=1 SV=3	ARAP1	0.001	189.192	30	36	77	36	1450	162.1
High	Q9Y4E8	Ubiquitin carboxyl-terminal hydrolase 15 OS=Homo sapiens (Human) OX=9606 GN=USP15 PE=1 SV=3	USP15	0.001	186.7	42	36	68	36	981	112.3
High	Q7Z589	BRCA2-interacting transcriptional repressor EMSY OS=Homo sapiens (Human) OX=9606 GN=EMSY PE=1 SV=2	EMSY	0.001	184.871	49	36	70	36	1322	141.4
High	O15357	Phosphatidylinositol 3,4,5-trisphosphate 5-phosphatase 2 OS=Homo sapiens (Human) OX=9606 GN=INPPL1 PE=1 SV=2	INPPL1	0.001	181.779	38	36	74	36	1258	138.5
High	Q13017	Rho GTPase-activating protein 5 OS=Homo sapiens (Human) OX=9606 GN=ARHGAP5 PE=1 SV=2	ARHGAP5	0.001	180.952	27	36	70	36	1502	172.4
High	Q96HA7	Tonsoku-like protein OS=Homo sapiens (Human) OX=9606 GN=TONSL PE=1 SV=2	TONSL	0.001	180.721	33	36	72	36	1378	150.8
High	Q9H7Z3	Nuclear exosome regulator NRDE2 OS=Homo sapiens (Human) OX=9606 GN=NRDE2 PE=1 SV=3	NRDE2	0.001	179.426	36	36	72	36	1164	132.6
High	Q8N5C6	S1 RNA-binding domain-containing protein 1 OS=Homo sapiens (Human) OX=9606 GN=SRBD1 PE=1 SV=2	SRBD1	0.001	177.999	39	36	67	36	995	111.7
High	P33527	Multidrug resistance-associated protein 1 OS=Homo sapiens (Human) OX=9606 GN=ABCC1 PE=1 SV=3	ABCC1	0.001	169.566	35	36	59	36	1531	171.5
High	Q8N122	Regulatory-associated protein of mTOR OS=Homo sapiens (Human) OX=9606 GN=RPTOR PE=1 SV=1	RPTOR	0.001	166.424	30	36	72	36	1335	148.9
High	Q9P0K7	Ankycorbin OS=Homo sapiens (Human) OX=9606 GN=RAI14 PE=1 SV=2	RAI14	0.001	162.092	41	36	68	36	980	110
High	Q92673	Sortilin-related receptor OS=Homo sapiens (Human) OX=9606 GN=SORL1 PE=1 SV=2	SORL1	0.001	154.629	20	36	67	36	2214	248.3
High	Q9NQT8	Kinesin-like protein KIF13B OS=Homo sapiens (Human) OX=9606 GN=KIF13B PE=1 SV=2	KIF13B	0.001	153.201	24	36	60	36	1826	202.7
High	Q7Z7B0	Filamin-A-interacting protein 1 OS=Homo sapiens (Human) OX=9606 GN=FILIP1 PE=1 SV=1	FILIP1	0.001	147.84	30	36	62	36	1213	138
High	Q86UU1	Pleckstrin homology-like domain family B member 1 OS=Homo sapiens (Human) OX=9606 GN=PHLDB1 PE=1 SV=1	PHLDB1	0.001	146.565	28	36	56	36	1377	151.1
High	Q8N4C6	Ninein OS=Homo sapiens (Human) OX=9606 GN=NIN PE=1 SV=4	NIN	0.001	142.386	18	36	66	36	2090	243.1
High	Q68DQ2	Very large A-kinase anchor protein OS=Homo sapiens (Human) OX=9606 GN=CRYBG3 PE=1 SV=3	CRYBG3	0.001	112.267	15	36	58	36	2970	330.4
High	Q66GS9	Centrosomal protein of 135 kDa OS=Homo sapiens (Human) OX=9606 GN=CEP135 PE=1 SV=2	CEP135	0.001	111.527	29	36	52	36	1140	133.4
High	Q8IVL0	Neuron navigator 3 OS=Homo sapiens (Human) OX=9606 GN=NAV3 PE=1 SV=3	NAV3	0.001	97.666	25	36	45	36	2385	255.5
High	Q99832	T-complex protein 1 subunit eta OS=Homo sapiens (Human) OX=9606 GN=CCT7 PE=1 SV=2	CCT7	0.003	396.364	64	35	396	35	543	59.3
High	P30153	Serine/threonine-protein phosphatase 2A 65 kDa regulatory subunit A alpha isoform OS=Homo sapiens (Human) OX=9606 GN=PPP2R1A PE=1 SV=4	PPP2R1A	0.003	380.228	62	35	280	35	589	65.3
High	Q9NZI8	Insulin-like growth factor 2 mRNA-binding protein 1 OS=Homo sapiens (Human) OX=9606 GN=IGF2BP1 PE=1 SV=2	IGF2BP1	0.003	348.168	56	35	534	35	577	63.4
High	P17980	26S proteasome regulatory subunit 6A OS=Homo sapiens (Human) OX=9606 GN=PSMC3 PE=1 SV=3	PSMC3	0.003	347.907	70	35	211	35	439	49.2
High	Q92973	Transportin-1 OS=Homo sapiens (Human) OX=9606 GN=TNPO1 PE=1 SV=2	TNPO1	0.002	337.566	45	35	217	35	898	102.3
High	Q9NRF8	CTP synthase 2 OS=Homo sapiens (Human) OX=9606 GN=CTPS2 PE=1 SV=1	CTPS2	0.002	302.803	60	35	184	35	586	65.6
High	P04843	Dolichyl-diphosphooligosaccharide--protein glycosyltransferase subunit 1 OS=Homo sapiens (Human) OX=9606 GN=RPN1 PE=1 SV=1	RPN1	0.002	292.007	62	35	230	35	607	68.5
High	P09960	Leukotriene A-4 hydrolase OS=Homo sapiens (Human) OX=9606 GN=LTA4H PE=1 SV=2	LTA4H	0.002	289.681	69	35	187	35	611	69.2
High	Q96KQ7	Histone-lysine N-methyltransferase EHMT2 OS=Homo sapiens (Human) OX=9606 GN=EHMT2 PE=1 SV=3	EHMT2	0.002	271.596	41	35	125	35	1210	132.3
High	Q9UJQ4	Sal-like protein 4 OS=Homo sapiens (Human) OX=9606 GN=SALL4 PE=1 SV=1	SALL4	0.001	253.554	51	35	105	35	1053	112.2
High	Q9Y6Y8	SEC23-interacting protein OS=Homo sapiens (Human) OX=9606 GN=SEC23IP PE=1 SV=1	SEC23IP	0.001	246.903	41	35	121	35	1000	111
High	Q9UHI6	Probable ATP-dependent RNA helicase DDX20 OS=Homo sapiens (Human) OX=9606 GN=DDX20 PE=1 SV=2	DDX20	0.001	241.16	49	35	105	35	824	92.2
High	Q96T76	MMS19 nucleotide excision repair protein homolog OS=Homo sapiens (Human) OX=9606 GN=MMS19 PE=1 SV=2	MMS19	0.001	238.001	41	35	104	35	1030	113.2
High	Q7Z2Z2	Elongation factor-like GTPase 1 OS=Homo sapiens (Human) OX=9606 GN=EFL1 PE=1 SV=2	EFL1	0.001	237.879	41	35	94	35	1120	125.4
High	Q66K74	Microtubule-associated protein 1S OS=Homo sapiens (Human) OX=9606 GN=MAP1S PE=1 SV=2	MAP1S	0.001	234.863	41	35	113	35	1059	112.1
High	Q86UV5	Ubiquitin carboxyl-terminal hydrolase 48 OS=Homo sapiens (Human) OX=9606 GN=USP48 PE=1 SV=1	USP48	0.001	233.685	43	35	96	35	1035	119
High	Q12996	Cleavage stimulation factor subunit 3 OS=Homo sapiens (Human) OX=9606 GN=CSTF3 PE=1 SV=1	CSTF3	0.001	231.53	58	35	128	35	717	82.9
High	Q9Y4W2	Ribosomal biogenesis protein LAS1L OS=Homo sapiens (Human) OX=9606 GN=LAS1L PE=1 SV=2	LAS1L	0.001	229.33	58	35	86	35	734	83
High	O60934	Nibrin OS=Homo sapiens (Human) OX=9606 GN=NBN PE=1 SV=1	NBN	0.001	226.606	60	35	91	35	754	84.9
High	Q9UNX4	WD repeat-containing protein 3 OS=Homo sapiens (Human) OX=9606 GN=WDR3 PE=1 SV=1	WDR3	0.001	225.49	41	35	75	35	943	106
High	Q68E01	Integrator complex subunit 3 OS=Homo sapiens (Human) OX=9606 GN=INTS3 PE=1 SV=1	INTS3	0.001	224.162	40	35	87	35	1043	118
High	Q8WVB6	Chromosome transmission fidelity protein 18 homolog OS=Homo sapiens (Human) OX=9606 GN=CHTF18 PE=1 SV=1	CHTF18	0.001	220.436	46	35	87	35	975	107.3
High	Q8IWZ3	Ankyrin repeat and KH domain-containing protein 1 OS=Homo sapiens (Human) OX=9606 GN=ANKHD1 PE=1 SV=1	ANKHD1	0.001	218.435	23	35	87	35	2542	269.3
High	Q12882	Dihydropyrimidine dehydrogenase [NADP(+)] OS=Homo sapiens (Human) OX=9606 GN=DPYD PE=1 SV=2	DPYD	0.001	208.892	43	35	89	35	1025	111.3
High	Q8NDT2	Putative RNA-binding protein 15B OS=Homo sapiens (Human) OX=9606 GN=RBM15B PE=1 SV=3	RBM15B	0.001	198.033	45	35	88	35	890	97.1
High	Q9HD20	Manganese-transporting ATPase 13A1 OS=Homo sapiens (Human) OX=9606 GN=ATP13A1 PE=1 SV=2	ATP13A1	0.001	196.789	33	35	97	35	1204	132.9
High	Q96HW7	Integrator complex subunit 4 OS=Homo sapiens (Human) OX=9606 GN=INTS4 PE=1 SV=2	INTS4	0.001	195.834	45	35	90	35	963	108.1
High	Q9P2D3	HEAT repeat-containing protein 5B OS=Homo sapiens (Human) OX=9606 GN=HEATR5B PE=1 SV=2	HEATR5B	0.001	194.642	24	35	63	35	2071	224.2
High	Q96JG6	Syndetin OS=Homo sapiens (Human) OX=9606 GN=VPS50 PE=1 SV=3	VPS50	0.001	177.539	39	35	62	35	964	111.1
High	Q96QZ7	Membrane-associated guanylate kinase, WW and PDZ domain-containing protein 1 OS=Homo sapiens (Human) OX=9606 GN=MAGI1 PE=1 SV=3	MAGI1	0.001	176.621	36	35	71	35	1491	164.5
High	P49643	DNA primase large subunit OS=Homo sapiens (Human) OX=9606 GN=PRIM2 PE=1 SV=2	PRIM2	0.001	174.779	60	35	79	35	509	58.8
High	Q2TAZ0	Autophagy-related protein 2 homolog A OS=Homo sapiens (Human) OX=9606 GN=ATG2A PE=1 SV=3	ATG2A	0.001	168.229	25	35	62	35	1938	212.7
High	Q9BWU0	Kanadaptin OS=Homo sapiens (Human) OX=9606 GN=SLC4A1AP PE=1 SV=1	SLC4A1AP	0.001	167.41	60	35	75	35	796	88.8
High	Q9BZH6	WD repeat-containing protein 11 OS=Homo sapiens (Human) OX=9606 GN=WDR11 PE=1 SV=1	WDR11	0.001	167.146	37	35	68	35	1224	136.6
High	O15085	Rho guanine nucleotide exchange factor 11 OS=Homo sapiens (Human) OX=9606 GN=ARHGEF11 PE=1 SV=1	ARHGEF11	0.001	158.24	29	35	56	35	1522	167.6
High	Q9ULH1	Arf-GAP with SH3 domain, ANK repeat and PH domain-containing protein 1 OS=Homo sapiens (Human) OX=9606 GN=ASAP1 PE=1 SV=4	ASAP1	0.001	146.965	36	35	62	35	1129	125.4
High	O94885	SAM and SH3 domain-containing protein 1 OS=Homo sapiens (Human) OX=9606 GN=SASH1 PE=1 SV=3	SASH1	0.001	144.702	40	35	67	35	1247	136.6
High	O14654	Insulin receptor substrate 4 OS=Homo sapiens (Human) OX=9606 GN=IRS4 PE=1 SV=1	IRS4	0.001	138.057	33	35	59	35	1257	133.7
High	P05997	Collagen alpha-2(V) chain OS=Homo sapiens (Human) OX=9606 GN=COL5A2 PE=1 SV=3	COL5A2	0.001	131.501	40	35	61	35	1499	144.8
High	P38398	Breast cancer type 1 susceptibility protein OS=Homo sapiens (Human) OX=9606 GN=BRCA1 PE=1 SV=2	BRCA1	0.001	128.159	26	35	47	35	1863	207.6
High	Q8TDM6	Disks large homolog 5 OS=Homo sapiens (Human) OX=9606 GN=DLG5 PE=1 SV=4	DLG5	0.001	114.363	21	35	49	35	1919	213.7
High	Q9C0G0	Zinc finger protein 407 OS=Homo sapiens (Human) OX=9606 GN=ZNF407 PE=1 SV=2	ZNF407	0.001	104.58	22	35	48	35	2248	247.2
High	A4UGR9	Xin actin-binding repeat-containing protein 2 OS=Homo sapiens (Human) OX=9606 GN=XIRP2 PE=1 SV=2	XIRP2	0.001	91.747	12	35	44	35	3374	382.1
High	P07437	Tubulin beta chain OS=Homo sapiens (Human) OX=9606 GN=TUBB PE=1 SV=2	TUBB	0.022	758.09	96	34	1865	34	444	49.6
High	P68363	Tubulin alpha-1B chain OS=Homo sapiens (Human) OX=9606 GN=TUBA1B PE=1 SV=1	TUBA1B	0.011	580.741	87	34	2218	34	451	50.1
High	Q16658	Fascin OS=Homo sapiens (Human) OX=9606 GN=FSCN1 PE=1 SV=3	FSCN1	0.004	443.035	73	34	382	34	493	54.5
High	Q8NC51	Plasminogen activator inhibitor 1 RNA-binding protein OS=Homo sapiens (Human) OX=9606 GN=SERBP1 PE=1 SV=2	SERBP1	0.004	417.073	69	34	436	34	408	44.9
High	Q9NQC3	Reticulon-4 OS=Homo sapiens (Human) OX=9606 GN=RTN4 PE=1 SV=2	RTN4	0.003	395.738	47	34	229	34	1192	129.9
High	P48643	T-complex protein 1 subunit epsilon OS=Homo sapiens (Human) OX=9606 GN=CCT5 PE=1 SV=1	CCT5	0.003	384.738	59	34	415	34	541	59.6
High	P04075	Fructose-bisphosphate aldolase A OS=Homo sapiens (Human) OX=9606 GN=ALDOA PE=1 SV=2	ALDOA	0.003	371.866	84	34	326	34	364	39.4
High	Q14974	Importin subunit beta-1 OS=Homo sapiens (Human) OX=9606 GN=KPNB1 PE=1 SV=2	KPNB1	0.003	364.928	52	34	305	34	876	97.1
High	P05455	Lupus La protein OS=Homo sapiens (Human) OX=9606 GN=SSB PE=1 SV=2	SSB	0.003	356.198	60	34	294	34	408	46.8
High	O60341	Lysine-specific histone demethylase 1A OS=Homo sapiens (Human) OX=9606 GN=KDM1A PE=1 SV=2	KDM1A	0.003	355.899	54	34	184	34	852	92.8
High	O43776	Asparagine--tRNA ligase, cytoplasmic OS=Homo sapiens (Human) OX=9606 GN=NARS1 PE=1 SV=1	NARS1	0.002	340.974	63	34	215	34	548	62.9
High	P49411	Elongation factor Tu, mitochondrial OS=Homo sapiens (Human) OX=9606 GN=TUFM PE=1 SV=2	TUFM	0.002	331.045	67	34	258	34	452	49.5
High	O00231	26S proteasome non-ATPase regulatory subunit 11 OS=Homo sapiens (Human) OX=9606 GN=PSMD11 PE=1 SV=3	PSMD11	0.002	324.174	75	34	252	34	422	47.4
High	P35998	26S proteasome regulatory subunit 7 OS=Homo sapiens (Human) OX=9606 GN=PSMC2 PE=1 SV=3	PSMC2	0.002	314.921	74	34	260	34	433	48.6
High	P17844	Probable ATP-dependent RNA helicase DDX5 OS=Homo sapiens (Human) OX=9606 GN=DDX5 PE=1 SV=1	DDX5	0.002	293.801	48	34	321	34	614	69.1
High	Q96AE4	Far upstream element-binding protein 1 OS=Homo sapiens (Human) OX=9606 GN=FUBP1 PE=1 SV=3	FUBP1	0.002	285.337	63	34	194	34	644	67.5
High	P02533	Keratin, type I cytoskeletal 14 OS=Homo sapiens (Human) OX=9606 GN=KRT14 PE=1 SV=4	KRT14	0.001	262.665	72	34	126	34	472	51.5
High	Q8TD19	Serine/threonine-protein kinase Nek9 OS=Homo sapiens (Human) OX=9606 GN=NEK9 PE=1 SV=2	NEK9	0.001	262.411	51	34	108	34	979	107.1
High	P27448	MAP/microtubule affinity-regulating kinase 3 OS=Homo sapiens (Human) OX=9606 GN=MARK3 PE=1 SV=5	MARK3	0.001	255.982	50	34	106	34	753	84.4
High	Q1ED39	Lysine-rich nucleolar protein 1 OS=Homo sapiens (Human) OX=9606 GN=KNOP1 PE=1 SV=1	KNOP1	0.001	253.891	60	34	110	34	458	51.6
High	Q96PZ0	Pseudouridylate synthase 7 homolog OS=Homo sapiens (Human) OX=9606 GN=PUS7 PE=1 SV=2	PUS7	0.001	250.374	53	34	108	34	661	75
High	P26232	Catenin alpha-2 OS=Homo sapiens (Human) OX=9606 GN=CTNNA2 PE=1 SV=5	CTNNA2	0.001	245.617	48	34	131	34	953	105.2
High	P16435	NADPH--cytochrome P450 reductase OS=Homo sapiens (Human) OX=9606 GN=POR PE=1 SV=2	POR	0.001	241.001	55	34	158	34	677	76.6
High	Q9UG63	ATP-binding cassette sub-family F member 2 OS=Homo sapiens (Human) OX=9606 GN=ABCF2 PE=1 SV=2	ABCF2	0.001	239.464	48	34	148	34	623	71.2
High	Q4G0J3	La-related protein 7 OS=Homo sapiens (Human) OX=9606 GN=LARP7 PE=1 SV=1	LARP7	0.001	232.033	56	34	127	34	582	66.9
High	O76094	Signal recognition particle subunit SRP72 OS=Homo sapiens (Human) OX=9606 GN=SRP72 PE=1 SV=3	SRP72	0.001	229.725	61	34	130	34	671	74.6
High	P42224	Signal transducer and activator of transcription 1-alpha/beta OS=Homo sapiens (Human) OX=9606 GN=STAT1 PE=1 SV=2	STAT1	0.001	229.352	46	34	112	34	750	87.3
High	Q9P2I0	Cleavage and polyadenylation specificity factor subunit 2 OS=Homo sapiens (Human) OX=9606 GN=CPSF2 PE=1 SV=2	CPSF2	0.001	227.583	53	34	91	34	782	88.4
High	Q13619	Cullin-4A OS=Homo sapiens (Human) OX=9606 GN=CUL4A PE=1 SV=3	CUL4A	0.001	227.108	43	34	107	34	759	87.6
High	Q9NSD9	Phenylalanine--tRNA ligase beta subunit OS=Homo sapiens (Human) OX=9606 GN=FARSB PE=1 SV=3	FARSB	0.001	226.841	55	34	167	34	589	66.1
High	P49589	Cysteine--tRNA ligase, cytoplasmic OS=Homo sapiens (Human) OX=9606 GN=CARS1 PE=1 SV=3	CARS1	0.001	223.984	50	34	101	34	748	85.4
High	P02786	Transferrin receptor protein 1 OS=Homo sapiens (Human) OX=9606 GN=TFRC PE=1 SV=2	TFRC	0.001	222.235	46	34	105	34	760	84.8
High	P12081	Histidine--tRNA ligase, cytoplasmic OS=Homo sapiens (Human) OX=9606 GN=HARS1 PE=1 SV=2	HARS1	0.001	221.637	58	34	119	34	509	57.4
High	O15294	UDP-N-acetylglucosamine--peptide N-acetylglucosaminyltransferase 110 kDa subunit OS=Homo sapiens (Human) OX=9606 GN=OGT PE=1 SV=3	OGT	0.001	220.212	39	34	99	34	1046	116.9
High	Q9NY33	Dipeptidyl peptidase 3 OS=Homo sapiens (Human) OX=9606 GN=DPP3 PE=1 SV=2	DPP3	0.001	218.021	54	34	120	34	737	82.5
High	Q8N766	ER membrane protein complex subunit 1 OS=Homo sapiens (Human) OX=9606 GN=EMC1 PE=1 SV=1	EMC1	0.001	213.945	44	34	99	34	993	111.7
High	Q9H0B6	Kinesin light chain 2 OS=Homo sapiens (Human) OX=9606 GN=KLC2 PE=1 SV=1	KLC2	0.001	213.561	57	34	89	34	622	68.9
High	Q8WTT2	Nucleolar complex protein 3 homolog OS=Homo sapiens (Human) OX=9606 GN=NOC3L PE=1 SV=1	NOC3L	0.001	211.02	41	34	78	34	800	92.5
High	Q99615	DnaJ homolog subfamily C member 7 OS=Homo sapiens (Human) OX=9606 GN=DNAJC7 PE=1 SV=2	DNAJC7	0.001	206.596	56	34	99	34	494	56.4
High	Q9P2R3	Rabankyrin-5 OS=Homo sapiens (Human) OX=9606 GN=ANKFY1 PE=1 SV=2	ANKFY1	0.001	203.228	39	34	100	34	1169	128.3
High	Q5VT52	Regulation of nuclear pre-mRNA domain-containing protein 2 OS=Homo sapiens (Human) OX=9606 GN=RPRD2 PE=1 SV=1	RPRD2	0.001	203.121	31	34	82	34	1461	155.9
High	P52888	Thimet oligopeptidase OS=Homo sapiens (Human) OX=9606 GN=THOP1 PE=1 SV=2	THOP1	0.001	197.933	58	34	110	34	689	78.8
High	Q2M389	WASH complex subunit 4 OS=Homo sapiens (Human) OX=9606 GN=WASHC4 PE=1 SV=2	WASHC4	0.001	196.124	30	34	90	34	1173	136.3
High	Q5GLZ8	Probable E3 ubiquitin-protein ligase HERC4 OS=Homo sapiens (Human) OX=9606 GN=HERC4 PE=1 SV=1	HERC4	0.001	195.544	35	34	81	34	1057	118.5
High	Q13129	Zinc finger protein Rlf OS=Homo sapiens (Human) OX=9606 GN=RLF PE=1 SV=2	RLF	0.001	195.399	23	34	72	34	1914	217.8
High	Q9H582	Zinc finger protein 644 OS=Homo sapiens (Human) OX=9606 GN=ZNF644 PE=1 SV=2	ZNF644	0.001	192.153	34	34	72	34	1327	149.5
High	Q13206	Probable ATP-dependent RNA helicase DDX10 OS=Homo sapiens (Human) OX=9606 GN=DDX10 PE=1 SV=2	DDX10	0.001	187.564	43	34	72	34	875	100.8
High	P52735	Guanine nucleotide exchange factor VAV2 OS=Homo sapiens (Human) OX=9606 GN=VAV2 PE=1 SV=2	VAV2	0.001	187.53	40	34	91	34	878	101.2
High	Q9NVE7	4'-phosphopantetheine phosphatase OS=Homo sapiens (Human) OX=9606 GN=PANK4 PE=1 SV=1	PANK4	0.001	186.448	51	34	85	34	773	85.9
High	Q5VU97	VWFA and cache domain-containing protein 1 OS=Homo sapiens (Human) OX=9606 GN=CACHD1 PE=2 SV=2	CACHD1	0.001	184.994	34	34	85	34	1274	142.2
High	Q14978	Nucleolar and coiled-body phosphoprotein 1 OS=Homo sapiens (Human) OX=9606 GN=NOLC1 PE=1 SV=2	NOLC1	0.001	176.668	45	34	143	34	699	73.6
High	Q92547	DNA topoisomerase 2-binding protein 1 OS=Homo sapiens (Human) OX=9606 GN=TOPBP1 PE=1 SV=3	TOPBP1	0.001	172.244	26	34	56	34	1522	170.6
High	P23471	Receptor-type tyrosine-protein phosphatase zeta OS=Homo sapiens (Human) OX=9606 GN=PTPRZ1 PE=1 SV=4	PTPRZ1	0.001	169.765	17	34	78	34	2315	254.4	oRG
High	Q9NQS7	Inner centromere protein OS=Homo sapiens (Human) OX=9606 GN=INCENP PE=1 SV=3	INCENP	0.001	166.854	44	34	77	34	918	105.4
High	P00519	Tyrosine-protein kinase ABL1 OS=Homo sapiens (Human) OX=9606 GN=ABL1 PE=1 SV=4	ABL1	0.001	165.12	37	34	71	34	1130	122.8
High	P54098	DNA polymerase subunit gamma-1 OS=Homo sapiens (Human) OX=9606 GN=POLG PE=1 SV=1	POLG	0.001	161.732	38	34	61	34	1239	139.5
High	Q93100	Phosphorylase b kinase regulatory subunit beta OS=Homo sapiens (Human) OX=9606 GN=PHKB PE=1 SV=3	PHKB	0.001	160.712	38	34	72	34	1093	124.8
High	P78316	Nucleolar protein 14 OS=Homo sapiens (Human) OX=9606 GN=NOP14 PE=1 SV=3	NOP14	0.001	160.234	43	34	59	34	857	97.6
High	Q9P2P5	E3 ubiquitin-protein ligase HECW2 OS=Homo sapiens (Human) OX=9606 GN=HECW2 PE=1 SV=2	HECW2	0.001	157.072	24	34	66	34	1572	175.7
High	Q86W56	Poly(ADP-ribose) glycohydrolase OS=Homo sapiens (Human) OX=9606 GN=PARG PE=1 SV=1	PARG	0.001	155.54	45	34	56	34	976	111
High	Q8TCG1	Protein CIP2A OS=Homo sapiens (Human) OX=9606 GN=CIP2A PE=1 SV=2	CIP2A	0.001	149.969	34	34	74	34	905	102.1
High	O43157	Plexin-B1 OS=Homo sapiens (Human) OX=9606 GN=PLXNB1 PE=1 SV=3	PLXNB1	0.001	147.675	20	34	55	34	2135	232.2
High	P16885	1-phosphatidylinositol 4,5-bisphosphate phosphodiesterase gamma-2 OS=Homo sapiens (Human) OX=9606 GN=PLCG2 PE=1 SV=4	PLCG2	0.001	147.061	35	34	53	34	1265	147.8
High	Q9ULL5	Proline-rich protein 12 OS=Homo sapiens (Human) OX=9606 GN=PRR12 PE=1 SV=3	PRR12	0.001	145.032	27	34	55	34	2036	210.9
High	Q6ZT12	E3 ubiquitin-protein ligase UBR3 OS=Homo sapiens (Human) OX=9606 GN=UBR3 PE=2 SV=2	UBR3	0.001	142.958	22	34	62	34	1888	212.3
High	Q15276	Rab GTPase-binding effector protein 1 OS=Homo sapiens (Human) OX=9606 GN=RABEP1 PE=1 SV=2	RABEP1	0.001	140.401	35	34	58	34	862	99.2
High	O94913	Pre-mRNA cleavage complex 2 protein Pcf11 OS=Homo sapiens (Human) OX=9606 GN=PCF11 PE=1 SV=3	PCF11	0.001	139.883	24	34	70	34	1555	172.9
High	P12882	Myosin-1 OS=Homo sapiens (Human) OX=9606 GN=MYH1 PE=1 SV=3	MYH1	0.001	134.341	19	34	48	34	1939	223
High	Q6ZUT9	DENN domain-containing protein 5B OS=Homo sapiens (Human) OX=9606 GN=DENND5B PE=1 SV=2	DENND5B	0.001	130.889	30	34	50	34	1274	144.9
High	Q9C0D5	Protein TANC1 OS=Homo sapiens (Human) OX=9606 GN=TANC1 PE=1 SV=3	TANC1	0.001	118.238	25	34	48	34	1861	202.1
High	Q3L8U1	Chromodomain-helicase-DNA-binding protein 9 OS=Homo sapiens (Human) OX=9606 GN=CHD9 PE=1 SV=2	CHD9	0.001	110.567	18	34	47	34	2897	325.8
High	P53804	E3 ubiquitin-protein ligase TTC3 OS=Homo sapiens (Human) OX=9606 GN=TTC3 PE=1 SV=2	TTC3	0.001	107.344	22	34	42	34	2025	229.7
High	P29401	Transketolase OS=Homo sapiens (Human) OX=9606 GN=TKT PE=1 SV=3	TKT	0.004	414.685	63	33	337	33	623	67.8
High	P00558	Phosphoglycerate kinase 1 OS=Homo sapiens (Human) OX=9606 GN=PGK1 PE=1 SV=3	PGK1	0.003	358.687	77	33	533	33	417	44.6
High	P07910	Heterogeneous nuclear ribonucleoproteins C1/C2 OS=Homo sapiens (Human) OX=9606 GN=HNRNPC PE=1 SV=4	HNRNPC	0.002	336.961	80	33	716	33	306	33.7
High	Q9Y230	RuvB-like 2 OS=Homo sapiens (Human) OX=9606 GN=RUVBL2 PE=1 SV=3	RUVBL2	0.002	323.815	61	33	162	33	463	51.1
High	O60701	UDP-glucose 6-dehydrogenase OS=Homo sapiens (Human) OX=9606 GN=UGDH PE=1 SV=1	UGDH	0.002	319.711	75	33	260	33	494	55
High	Q14738	Serine/threonine-protein phosphatase 2A 56 kDa regulatory subunit delta isoform OS=Homo sapiens (Human) OX=9606 GN=PPP2R5D PE=1 SV=1	PPP2R5D	0.002	308.746	61	33	149	33	602	69.9
High	Q01518	Adenylyl cyclase-associated protein 1 OS=Homo sapiens (Human) OX=9606 GN=CAP1 PE=1 SV=5	CAP1	0.002	304.304	64	33	342	33	475	51.9
High	P13591	Neural cell adhesion molecule 1 OS=Homo sapiens (Human) OX=9606 GN=NCAM1 PE=1 SV=3	NCAM1	0.002	296.863	41	33	144	33	858	94.5
High	O00232	26S proteasome non-ATPase regulatory subunit 12 OS=Homo sapiens (Human) OX=9606 GN=PSMD12 PE=1 SV=3	PSMD12	0.002	283.88	67	33	203	33	456	52.9
High	Q16851	UTP--glucose-1-phosphate uridylyltransferase OS=Homo sapiens (Human) OX=9606 GN=UGP2 PE=1 SV=5	UGP2	0.002	272.12	63	33	204	33	508	56.9
High	Q96AC1	Fermitin family homolog 2 OS=Homo sapiens (Human) OX=9606 GN=FERMT2 PE=1 SV=1	FERMT2	0.002	269.116	61	33	156	33	680	77.8
High	Q9NVP1	ATP-dependent RNA helicase DDX18 OS=Homo sapiens (Human) OX=9606 GN=DDX18 PE=1 SV=2	DDX18	0.001	261.497	52	33	157	33	670	75.4
High	Q8IY81	pre-rRNA 2'-O-ribose RNA methyltransferase FTSJ3 OS=Homo sapiens (Human) OX=9606 GN=FTSJ3 PE=1 SV=2	FTSJ3	0.001	259.812	47	33	117	33	847	96.5
High	P05556	Integrin beta-1 OS=Homo sapiens (Human) OX=9606 GN=ITGB1 PE=1 SV=2	ITGB1	0.001	251.413	38	33	193	33	798	88.4
High	Q13617	Cullin-2 OS=Homo sapiens (Human) OX=9606 GN=CUL2 PE=1 SV=2	CUL2	0.001	248.749	53	33	118	33	745	86.9
High	Q9BQ52	Zinc phosphodiesterase ELAC protein 2 OS=Homo sapiens (Human) OX=9606 GN=ELAC2 PE=1 SV=2	ELAC2	0.001	241.484	53	33	102	33	826	92.2
High	O43719	HIV Tat-specific factor 1 OS=Homo sapiens (Human) OX=9606 GN=HTATSF1 PE=1 SV=1	HTATSF1	0.001	227.181	42	33	120	33	755	85.8
High	Q9UBC3	DNA (cytosine-5)-methyltransferase 3B OS=Homo sapiens (Human) OX=9606 GN=DNMT3B PE=1 SV=1	DNMT3B	0.001	223.983	48	33	94	33	853	95.7
High	Q8TAF3	WD repeat-containing protein 48 OS=Homo sapiens (Human) OX=9606 GN=WDR48 PE=1 SV=1	WDR48	0.001	220.506	55	33	89	33	677	76.2
High	Q9GZR7	ATP-dependent RNA helicase DDX24 OS=Homo sapiens (Human) OX=9606 GN=DDX24 PE=1 SV=1	DDX24	0.001	220.105	46	33	103	33	859	96.3
High	Q6P1J9	Parafibromin OS=Homo sapiens (Human) OX=9606 GN=CDC73 PE=1 SV=1	CDC73	0.001	217.568	57	33	100	33	531	60.5
High	Q9Y4R8	Telomere length regulation protein TEL2 homolog OS=Homo sapiens (Human) OX=9606 GN=TELO2 PE=1 SV=2	TELO2	0.001	217.559	52	33	108	33	837	91.7
High	Q86Y56	Dynein assembly factor 5, axonemal OS=Homo sapiens (Human) OX=9606 GN=DNAAF5 PE=1 SV=4	DNAAF5	0.001	205.855	45	33	98	33	855	93.5
High	Q05086	Ubiquitin-protein ligase E3A OS=Homo sapiens (Human) OX=9606 GN=UBE3A PE=1 SV=4	UBE3A	0.001	205.541	39	33	85	33	875	100.6
High	Q86X10	Ral GTPase-activating protein subunit beta OS=Homo sapiens (Human) OX=9606 GN=RALGAPB PE=1 SV=1	RALGAPB	0.001	204.973	29	33	80	33	1494	166.7
High	Q5JTZ9	Alanine--tRNA ligase, mitochondrial OS=Homo sapiens (Human) OX=9606 GN=AARS2 PE=1 SV=1	AARS2	0.001	204.757	36	33	93	33	985	107.3
High	Q12788	Transducin beta-like protein 3 OS=Homo sapiens (Human) OX=9606 GN=TBL3 PE=1 SV=2	TBL3	0.001	203.523	45	33	101	33	808	89
High	Q15418	Ribosomal protein S6 kinase alpha-1 OS=Homo sapiens (Human) OX=9606 GN=RPS6KA1 PE=1 SV=2	RPS6KA1	0.001	203.456	51	33	97	33	735	82.7
High	Q9Y6X9	ATPase MORC2 OS=Homo sapiens (Human) OX=9606 GN=MORC2 PE=1 SV=2	MORC2	0.001	202.691	37	33	103	33	1032	117.8
High	Q2NL82	Pre-rRNA-processing protein TSR1 homolog OS=Homo sapiens (Human) OX=9606 GN=TSR1 PE=1 SV=1	TSR1	0.001	197.884	43	33	114	33	804	91.8
High	Q9P2K5	Myelin expression factor 2 OS=Homo sapiens (Human) OX=9606 GN=MYEF2 PE=1 SV=3	MYEF2	0.001	196.994	52	33	107	33	600	64.1
High	P21127	Cyclin-dependent kinase 11B OS=Homo sapiens (Human) OX=9606 GN=CDK11B PE=1 SV=4	CDK11B	0.001	193.112	43	33	111	33	795	92.6
High	Q86YS7	C2 domain-containing protein 5 OS=Homo sapiens (Human) OX=9606 GN=C2CD5 PE=1 SV=1	C2CD5	0.001	190.373	40	33	75	33	1000	110.4
High	O00159	Unconventional myosin-Ic OS=Homo sapiens (Human) OX=9606 GN=MYO1C PE=1 SV=4	MYO1C	0.001	189.42	32	33	71	33	1063	121.6
High	Q9P1Y5	Calmodulin-regulated spectrin-associated protein 3 OS=Homo sapiens (Human) OX=9606 GN=CAMSAP3 PE=1 SV=2	CAMSAP3	0.001	184.293	32	33	65	33	1249	134.7
High	P40818	Ubiquitin carboxyl-terminal hydrolase 8 OS=Homo sapiens (Human) OX=9606 GN=USP8 PE=1 SV=1	USP8	0.001	179.234	34	33	81	33	1118	127.4
High	Q96T51	RUN and FYVE domain-containing protein 1 OS=Homo sapiens (Human) OX=9606 GN=RUFY1 PE=1 SV=2	RUFY1	0.001	174.538	49	33	68	33	708	79.8
High	Q9UL54	Serine/threonine-protein kinase TAO2 OS=Homo sapiens (Human) OX=9606 GN=TAOK2 PE=1 SV=2	TAOK2	0.001	171.229	29	33	72	33	1235	138.2
High	Q13625	Apoptosis-stimulating of p53 protein 2 OS=Homo sapiens (Human) OX=9606 GN=TP53BP2 PE=1 SV=2	TP53BP2	0.001	171.111	38	33	57	33	1128	125.5
High	Q66K14	TBC1 domain family member 9B OS=Homo sapiens (Human) OX=9606 GN=TBC1D9B PE=1 SV=3	TBC1D9B	0.001	170.073	33	33	67	33	1250	140.4
High	O75044	SLIT-ROBO Rho GTPase-activating protein 2 OS=Homo sapiens (Human) OX=9606 GN=SRGAP2 PE=1 SV=3	SRGAP2	0.001	166.851	42	33	58	33	1071	120.8
High	P40692	DNA mismatch repair protein Mlh1 OS=Homo sapiens (Human) OX=9606 GN=MLH1 PE=1 SV=1	MLH1	0.001	163.672	48	33	96	33	756	84.5
High	O60315	Zinc finger E-box-binding homeobox 2 OS=Homo sapiens (Human) OX=9606 GN=ZEB2 PE=1 SV=1	ZEB2	0.001	159.294	36	33	72	33	1214	136.4
High	Q14004	Cyclin-dependent kinase 13 OS=Homo sapiens (Human) OX=9606 GN=CDK13 PE=1 SV=2	CDK13	0.001	158.602	24	33	68	33	1512	164.8
High	Q9UKJ3	G patch domain-containing protein 8 OS=Homo sapiens (Human) OX=9606 GN=GPATCH8 PE=1 SV=2	GPATCH8	0.001	158.024	27	33	64	33	1502	164.1
High	P06400	Retinoblastoma-associated protein OS=Homo sapiens (Human) OX=9606 GN=RB1 PE=1 SV=2	RB1	0.001	157.233	31	33	60	33	928	106.1
High	Q92625	Ankyrin repeat and SAM domain-containing protein 1A OS=Homo sapiens (Human) OX=9606 GN=ANKS1A PE=1 SV=4	ANKS1A	0.001	156.35	41	33	61	33	1134	123
High	O75182	Paired amphipathic helix protein Sin3b OS=Homo sapiens (Human) OX=9606 GN=SIN3B PE=1 SV=2	SIN3B	0.001	146.831	36	33	67	33	1162	133
High	O43909	Exostosin-like 3 OS=Homo sapiens (Human) OX=9606 GN=EXTL3 PE=1 SV=1	EXTL3	0.001	138.747	45	33	59	33	919	104.7
High	P54277	PMS1 protein homolog 1 OS=Homo sapiens (Human) OX=9606 GN=PMS1 PE=1 SV=1	PMS1	0.001	136.788	32	33	67	33	932	105.8
High	O14924	Regulator of G-protein signaling 12 OS=Homo sapiens (Human) OX=9606 GN=RGS12 PE=1 SV=1	RGS12	0.001	134.486	33	33	51	33	1447	156.3
High	O75147	Obscurin-like protein 1 OS=Homo sapiens (Human) OX=9606 GN=OBSL1 PE=1 SV=4	OBSL1	0.001	127.455	24	33	45	33	1896	206.8
High	Q9P2P1	Protein NYNRIN OS=Homo sapiens (Human) OX=9606 GN=NYNRIN PE=2 SV=3	NYNRIN	0.001	125.805	23	33	51	33	1898	208.2
High	Q9NZN5	Rho guanine nucleotide exchange factor 12 OS=Homo sapiens (Human) OX=9606 GN=ARHGEF12 PE=1 SV=1	ARHGEF12	0.001	125.47	24	33	48	33	1544	173.1
High	Q08AD1	Calmodulin-regulated spectrin-associated protein 2 OS=Homo sapiens (Human) OX=9606 GN=CAMSAP2 PE=1 SV=3	CAMSAP2	0.001	124.276	27	33	49	33	1489	168
High	P54132	Bloom syndrome protein OS=Homo sapiens (Human) OX=9606 GN=BLM PE=1 SV=1	BLM	0.001	123.886	30	33	49	33	1417	158.9
High	Q5SYE7	NHS-like protein 1 OS=Homo sapiens (Human) OX=9606 GN=NHSL1 PE=1 SV=2	NHSL1	0.001	116.244	30	33	61	33	1610	170.6
High	P39880	Homeobox protein cut-like 1 OS=Homo sapiens (Human) OX=9606 GN=CUX1 PE=1 SV=3	CUX1	0.001	114.478	27	33	58	33	1505	164.1
High	P02452	Collagen alpha-1(I) chain OS=Homo sapiens (Human) OX=9606 GN=COL1A1 PE=1 SV=5	COL1A1	0.001	111.376	32	33	53	33	1464	138.9
High	O94986	Centrosomal protein of 152 kDa OS=Homo sapiens (Human) OX=9606 GN=CEP152 PE=1 SV=4	CEP152	0.001	108.736	22	33	47	33	1710	195.5
High	Q5H9R4	Armadillo repeat-containing X-linked protein 4 OS=Homo sapiens (Human) OX=9606 GN=ARMCX4 PE=2 SV=3	ARMCX4	0.001	108.102	22	33	38	33	2290	235.8
High	Q8NFU7	Methylcytosine dioxygenase TET1 OS=Homo sapiens (Human) OX=9606 GN=TET1 PE=1 SV=2	TET1	0.001	105.491	17	33	50	33	2136	235.2
High	Q5VT25	Serine/threonine-protein kinase MRCK alpha OS=Homo sapiens (Human) OX=9606 GN=CDC42BPA PE=1 SV=1	CDC42BPA	0.001	101.829	22	33	47	33	1732	197.2
High	Q9NYQ6	Cadherin EGF LAG seven-pass G-type receptor 1 OS=Homo sapiens (Human) OX=9606 GN=CELSR1 PE=1 SV=1	CELSR1	0.001	98.163	16	33	42	33	3014	329.3
High	Q16555	Dihydropyrimidinase-related protein 2 OS=Homo sapiens (Human) OX=9606 GN=DPYSL2 PE=1 SV=1	DPYSL2	0.004	421.374	69	32	533	32	572	62.3
High	P61978	Heterogeneous nuclear ribonucleoprotein K OS=Homo sapiens (Human) OX=9606 GN=HNRNPK PE=1 SV=1	HNRNPK	0.004	412.199	67	32	784	32	463	50.9
High	P12814	Alpha-actinin-1 OS=Homo sapiens (Human) OX=9606 GN=ACTN1 PE=1 SV=2	ACTN1	0.002	330.382	44	32	334	32	892	103
High	P12268	Inosine-5'-monophosphate dehydrogenase 2 OS=Homo sapiens (Human) OX=9606 GN=IMPDH2 PE=1 SV=2	IMPDH2	0.002	322.135	55	32	204	32	514	55.8
High	P06744	Glucose-6-phosphate isomerase OS=Homo sapiens (Human) OX=9606 GN=GPI PE=1 SV=4	GPI	0.002	315.855	66	32	183	32	558	63.1
High	P36578	60S ribosomal protein L4 OS=Homo sapiens (Human) OX=9606 GN=RPL4 PE=1 SV=5	RPL4	0.002	312.992	60	32	426	32	427	47.7
High	Q9P258	Protein RCC2 OS=Homo sapiens (Human) OX=9606 GN=RCC2 PE=1 SV=2	RCC2	0.002	302.78	69	32	229	32	522	56
High	P61221	ATP-binding cassette sub-family E member 1 OS=Homo sapiens (Human) OX=9606 GN=ABCE1 PE=1 SV=1	ABCE1	0.002	270.992	56	32	158	32	599	67.3
High	Q92945	Far upstream element-binding protein 2 OS=Homo sapiens (Human) OX=9606 GN=KHSRP PE=1 SV=4	KHSRP	0.002	270.975	59	32	146	32	711	73.1
High	P48147	Prolyl endopeptidase OS=Homo sapiens (Human) OX=9606 GN=PREP PE=1 SV=2	PREP	0.001	251.421	55	32	167	32	710	80.6
High	Q8N1G4	Leucine-rich repeat-containing protein 47 OS=Homo sapiens (Human) OX=9606 GN=LRRC47 PE=1 SV=1	LRRC47	0.001	247.306	64	32	137	32	583	63.4
High	O14744	Protein arginine N-methyltransferase 5 OS=Homo sapiens (Human) OX=9606 GN=PRMT5 PE=1 SV=4	PRMT5	0.001	245.88	57	32	112	32	637	72.6
High	Q96G03	Phosphoglucomutase-2 OS=Homo sapiens (Human) OX=9606 GN=PGM2 PE=1 SV=4	PGM2	0.001	242.566	47	32	140	32	612	68.2
High	P48444	Coatomer subunit delta OS=Homo sapiens (Human) OX=9606 GN=ARCN1 PE=1 SV=1	ARCN1	0.001	237.118	58	32	162	32	511	57.2
High	Q96GM5	SWI/SNF-related matrix-associated actin-dependent regulator of chromatin subfamily D member 1 OS=Homo sapiens (Human) OX=9606 GN=SMARCD1 PE=1 SV=2	SMARCD1	0.001	224.317	71	32	137	32	515	58.2
High	Q9Y678	Coatomer subunit gamma-1 OS=Homo sapiens (Human) OX=9606 GN=COPG1 PE=1 SV=1	COPG1	0.001	223.93	43	32	80	32	874	97.7
High	Q14694	Ubiquitin carboxyl-terminal hydrolase 10 OS=Homo sapiens (Human) OX=9606 GN=USP10 PE=1 SV=2	USP10	0.001	220.438	45	32	114	32	798	87.1
High	P11413	Glucose-6-phosphate 1-dehydrogenase OS=Homo sapiens (Human) OX=9606 GN=G6PD PE=1 SV=4	G6PD	0.001	216.401	57	32	121	32	515	59.2
High	Q06124	Tyrosine-protein phosphatase non-receptor type 11 OS=Homo sapiens (Human) OX=9606 GN=PTPN11 PE=1 SV=3	PTPN11	0.001	214.608	60	32	117	32	593	68
High	P51003	Poly(A) polymerase alpha OS=Homo sapiens (Human) OX=9606 GN=PAPOLA PE=1 SV=4	PAPOLA	0.001	211.975	51	32	90	32	745	82.8
High	O14936	Peripheral plasma membrane protein CASK OS=Homo sapiens (Human) OX=9606 GN=CASK PE=1 SV=3	CASK	0.001	209.459	40	32	126	32	926	105.1
High	Q9NUL3	Double-stranded RNA-binding protein Staufen homolog 2 OS=Homo sapiens (Human) OX=9606 GN=STAU2 PE=1 SV=2	STAU2	0.001	208.176	62	32	115	32	570	62.6
High	Q99575	Ribonucleases P/MRP protein subunit POP1 OS=Homo sapiens (Human) OX=9606 GN=POP1 PE=1 SV=2	POP1	0.001	203.935	38	32	84	32	1024	114.6
High	Q96PK6	RNA-binding protein 14 OS=Homo sapiens (Human) OX=9606 GN=RBM14 PE=1 SV=2	RBM14	0.001	203.674	40	32	116	32	669	69.4
High	Q15375	Ephrin type-A receptor 7 OS=Homo sapiens (Human) OX=9606 GN=EPHA7 PE=1 SV=3	EPHA7	0.001	202.312	41	32	102	32	998	112
High	Q96FV9	THO complex subunit 1 OS=Homo sapiens (Human) OX=9606 GN=THOC1 PE=1 SV=1	THOC1	0.001	192.863	49	32	97	32	657	75.6
High	Q02246	Contactin-2 OS=Homo sapiens (Human) OX=9606 GN=CNTN2 PE=1 SV=1	CNTN2	0.001	192.752	40	32	88	32	1040	113.3
High	O14976	Cyclin-G-associated kinase OS=Homo sapiens (Human) OX=9606 GN=GAK PE=1 SV=2	GAK	0.001	188.657	32	32	68	32	1311	143.1
High	Q5QJE6	Deoxynucleotidyltransferase terminal-interacting protein 2 OS=Homo sapiens (Human) OX=9606 GN=DNTTIP2 PE=1 SV=2	DNTTIP2	0.001	188.436	54	32	83	32	756	84.4
High	O00471	Exocyst complex component 5 OS=Homo sapiens (Human) OX=9606 GN=EXOC5 PE=1 SV=1	EXOC5	0.001	187.43	43	32	89	32	708	81.8
High	Q5VIR6	Vacuolar protein sorting-associated protein 53 homolog OS=Homo sapiens (Human) OX=9606 GN=VPS53 PE=1 SV=2	VPS53	0.001	186.538	42	32	87	32	832	94.3
High	Q9Y4W6	AFG3-like protein 2 OS=Homo sapiens (Human) OX=9606 GN=AFG3L2 PE=1 SV=2	AFG3L2	0.001	183.882	41	32	77	32	797	88.5
High	Q9NZB2	Constitutive coactivator of PPAR-gamma-like protein 1 OS=Homo sapiens (Human) OX=9606 GN=FAM120A PE=1 SV=2	FAM120A	0.001	180.556	40	32	65	32	1118	121.8
High	Q96T60	Bifunctional polynucleotide phosphatase/kinase OS=Homo sapiens (Human) OX=9606 GN=PNKP PE=1 SV=1	PNKP	0.001	179.865	58	32	82	32	521	57
High	Q32MZ4	Leucine-rich repeat flightless-interacting protein 1 OS=Homo sapiens (Human) OX=9606 GN=LRRFIP1 PE=1 SV=2	LRRFIP1	0.001	174.316	56	32	68	32	808	89.2
High	Q659A1	Little elongation complex subunit 2 OS=Homo sapiens (Human) OX=9606 GN=ICE2 PE=1 SV=2	ICE2	0.001	172.175	40	32	55	32	982	109.9
High	Q92574	Hamartin OS=Homo sapiens (Human) OX=9606 GN=TSC1 PE=1 SV=2	TSC1	0.001	171.001	38	32	60	32	1164	129.7
High	Q5T5X7	BEN domain-containing protein 3 OS=Homo sapiens (Human) OX=9606 GN=BEND3 PE=1 SV=1	BEND3	0.001	169.314	49	32	59	32	828	94.4
High	Q9H7N4	Splicing factor, arginine/serine-rich 19 OS=Homo sapiens (Human) OX=9606 GN=SCAF1 PE=1 SV=3	SCAF1	0.001	168.439	33	32	80	32	1312	139.2
High	Q92541	RNA polymerase-associated protein RTF1 homolog OS=Homo sapiens (Human) OX=9606 GN=RTF1 PE=1 SV=4	RTF1	0.001	167.084	45	32	81	32	710	80.3
High	A7E2V4	Zinc finger SWIM domain-containing protein 8 OS=Homo sapiens (Human) OX=9606 GN=ZSWIM8 PE=1 SV=1	ZSWIM8	0.001	166.973	25	32	58	32	1837	197.2
High	Q9P265	Disco-interacting protein 2 homolog B OS=Homo sapiens (Human) OX=9606 GN=DIP2B PE=1 SV=3	DIP2B	0.001	163.388	25	32	70	32	1576	171.4
High	Q5T1M5	FK506-binding protein 15 OS=Homo sapiens (Human) OX=9606 GN=FKBP15 PE=1 SV=2	FKBP15	0.001	162.275	35	32	69	32	1219	133.5
High	Q5TGY3	AT-hook DNA-binding motif-containing protein 1 OS=Homo sapiens (Human) OX=9606 GN=AHDC1 PE=1 SV=1	AHDC1	0.001	161.31	30	32	64	32	1603	168.2
High	P54278	Mismatch repair endonuclease PMS2 OS=Homo sapiens (Human) OX=9606 GN=PMS2 PE=1 SV=2	PMS2	0.001	161.126	44	32	61	32	862	95.7
High	P06756	Integrin alpha-V OS=Homo sapiens (Human) OX=9606 GN=ITGAV PE=1 SV=2	ITGAV	0.001	156.358	45	32	65	32	1048	116
High	Q9ULD9	Zinc finger protein 608 OS=Homo sapiens (Human) OX=9606 GN=ZNF608 PE=1 SV=4	ZNF608	0.001	154.985	25	32	53	32	1512	162.1
High	Q7Z2W4	Zinc finger CCCH-type antiviral protein 1 OS=Homo sapiens (Human) OX=9606 GN=ZC3HAV1 PE=1 SV=3	ZC3HAV1	0.001	148.139	44	32	66	32	902	101.4
High	Q9BX66	Sorbin and SH3 domain-containing protein 1 OS=Homo sapiens (Human) OX=9606 GN=SORBS1 PE=1 SV=3	SORBS1	0.001	144.454	33	32	54	32	1292	142.4
High	Q9Y4G8	Rap guanine nucleotide exchange factor 2 OS=Homo sapiens (Human) OX=9606 GN=RAPGEF2 PE=1 SV=1	RAPGEF2	0.001	141.176	31	32	51	32	1499	167.3
High	Q9ULK4	Mediator of RNA polymerase II transcription subunit 23 OS=Homo sapiens (Human) OX=9606 GN=MED23 PE=1 SV=2	MED23	0.001	136.757	28	32	54	32	1368	156.4
High	P46934	E3 ubiquitin-protein ligase NEDD4 OS=Homo sapiens (Human) OX=9606 GN=NEDD4 PE=1 SV=4	NEDD4	0.001	133.999	28	32	53	32	1319	149
High	Q86UW6	NEDD4-binding protein 2 OS=Homo sapiens (Human) OX=9606 GN=N4BP2 PE=1 SV=2	N4BP2	0.001	132.887	26	32	52	32	1770	198.7
High	Q86W92	Liprin-beta-1 OS=Homo sapiens (Human) OX=9606 GN=PPFIBP1 PE=1 SV=2	PPFIBP1	0.001	130.44	35	32	44	32	1011	114
High	Q5D862	Filaggrin-2 OS=Homo sapiens (Human) OX=9606 GN=FLG2 PE=1 SV=1	FLG2	0.001	129.431	39	32	51	32	2391	247.9
High	Q9Y485	DmX-like protein 1 OS=Homo sapiens (Human) OX=9606 GN=DMXL1 PE=1 SV=3	DMXL1	0.001	125.443	16	32	50	32	3027	337.6
High	Q14674	Separin OS=Homo sapiens (Human) OX=9606 GN=ESPL1 PE=1 SV=3	ESPL1	0.001	119.791	20	32	57	32	2120	233
High	Q96PE2	Rho guanine nucleotide exchange factor 17 OS=Homo sapiens (Human) OX=9606 GN=ARHGEF17 PE=1 SV=1	ARHGEF17	0.001	116.701	23	32	39	32	2063	221.5
High	Q96JE9	Microtubule-associated protein 6 OS=Homo sapiens (Human) OX=9606 GN=MAP6 PE=1 SV=2	MAP6	0.001	115.902	52	32	42	32	813	86.5
High	Q86SQ0	Pleckstrin homology-like domain family B member 2 OS=Homo sapiens (Human) OX=9606 GN=PHLDB2 PE=1 SV=2	PHLDB2	0.001	115.444	30	32	47	32	1253	142.1
High	Q8TDY2	RB1-inducible coiled-coil protein 1 OS=Homo sapiens (Human) OX=9606 GN=RB1CC1 PE=1 SV=3	RB1CC1	0.001	112.789	24	32	51	32	1594	183
High	Q9NYQ7	Cadherin EGF LAG seven-pass G-type receptor 3 OS=Homo sapiens (Human) OX=9606 GN=CELSR3 PE=1 SV=2	CELSR3	0.001	111.615	16	32	53	32	3312	358
High	O15015	Zinc finger protein 646 OS=Homo sapiens (Human) OX=9606 GN=ZNF646 PE=1 SV=2	ZNF646	0.001	108.998	27	32	53	32	1832	200.7
High	A7KAX9	Rho GTPase-activating protein 32 OS=Homo sapiens (Human) OX=9606 GN=ARHGAP32 PE=1 SV=1	ARHGAP32	0.001	108.887	23	32	41	32	2087	230.4
High	P12107	Collagen alpha-1(XI) chain OS=Homo sapiens (Human) OX=9606 GN=COL11A1 PE=1 SV=4	COL11A1	0.001	102.219	30	32	45	32	1806	181
High	Q9BYK8	Helicase with zinc finger domain 2 OS=Homo sapiens (Human) OX=9606 GN=HELZ2 PE=1 SV=6	HELZ2	0.001	102.191	18	32	42	32	2649	294.5
High	P20908	Collagen alpha-1(V) chain OS=Homo sapiens (Human) OX=9606 GN=COL5A1 PE=1 SV=3	COL5A1	0.001	97.906	27	32	41	32	1838	183.4
High	P68104	Elongation factor 1-alpha 1 OS=Homo sapiens (Human) OX=9606 GN=EEF1A1 PE=1 SV=1	EEF1A1	0.01	576.847	63	31	1365	31	462	50.1
High	P14866	Heterogeneous nuclear ribonucleoprotein L OS=Homo sapiens (Human) OX=9606 GN=HNRNPL PE=1 SV=2	HNRNPL	0.008	535.453	63	31	433	31	589	64.1
High	P09651	Heterogeneous nuclear ribonucleoprotein A1 OS=Homo sapiens (Human) OX=9606 GN=HNRNPA1 PE=1 SV=5	HNRNPA1	0.005	453.169	85	31	1009	31	372	38.7
High	P60842	Eukaryotic initiation factor 4A-I OS=Homo sapiens (Human) OX=9606 GN=EIF4A1 PE=1 SV=1	EIF4A1	0.004	401.488	77	31	513	31	406	46.1
High	P22234	Multifunctional protein ADE2 OS=Homo sapiens (Human) OX=9606 GN=PAICS PE=1 SV=3	PAICS	0.003	375.019	75	31	369	31	425	47
High	P17987	T-complex protein 1 subunit alpha OS=Homo sapiens (Human) OX=9606 GN=TCP1 PE=1 SV=1	TCP1	0.003	360.313	70	31	418	31	556	60.3
High	Q9Y5L0	Transportin-3 OS=Homo sapiens (Human) OX=9606 GN=TNPO3 PE=1 SV=3	TNPO3	0.002	327.649	42	31	164	31	923	104.1
High	P11940	Polyadenylate-binding protein 1 OS=Homo sapiens (Human) OX=9606 GN=PABPC1 PE=1 SV=2	PABPC1	0.002	299.751	44	31	337	31	636	70.6
High	O00178	GTP-binding protein 1 OS=Homo sapiens (Human) OX=9606 GN=GTPBP1 PE=1 SV=3	GTPBP1	0.002	293.943	54	31	133	31	669	72.4
High	P06396	Gelsolin OS=Homo sapiens (Human) OX=9606 GN=GSN PE=1 SV=1	GSN	0.002	274.673	46	31	152	31	782	85.6
High	O95373	Importin-7 OS=Homo sapiens (Human) OX=9606 GN=IPO7 PE=1 SV=1	IPO7	0.002	268.958	38	31	136	31	1038	119.4
High	P05783	Keratin, type I cytoskeletal 18 OS=Homo sapiens (Human) OX=9606 GN=KRT18 PE=1 SV=2	KRT18	0.001	260.969	67	31	154	31	430	48
High	P38606	V-type proton ATPase catalytic subunit A OS=Homo sapiens (Human) OX=9606 GN=ATP6V1A PE=1 SV=2	ATP6V1A	0.001	260.28	61	31	162	31	617	68.3
High	O15371	Eukaryotic translation initiation factor 3 subunit D OS=Homo sapiens (Human) OX=9606 GN=EIF3D PE=1 SV=1	EIF3D	0.001	254.506	64	31	152	31	548	63.9
High	P42166	Lamina-associated polypeptide 2, isoform alpha OS=Homo sapiens (Human) OX=9606 GN=TMPO PE=1 SV=2	TMPO	0.001	249.549	52	31	125	31	694	75.4
High	Q9BZZ5	Apoptosis inhibitor 5 OS=Homo sapiens (Human) OX=9606 GN=API5 PE=1 SV=3	API5	0.001	245.323	63	31	201	31	524	59
High	O00425	Insulin-like growth factor 2 mRNA-binding protein 3 OS=Homo sapiens (Human) OX=9606 GN=IGF2BP3 PE=1 SV=2	IGF2BP3	0.001	244.451	52	31	188	31	579	63.7
High	O95671	Probable bifunctional dTTP/UTP pyrophosphatase/methyltransferase protein OS=Homo sapiens (Human) OX=9606 GN=ASMTL PE=1 SV=3	ASMTL	0.001	237.383	53	31	155	31	621	68.8
High	Q9Y5Q9	General transcription factor 3C polypeptide 3 OS=Homo sapiens (Human) OX=9606 GN=GTF3C3 PE=1 SV=1	GTF3C3	0.001	236.512	42	31	94	31	886	101.2
High	Q6NYC8	Phostensin OS=Homo sapiens (Human) OX=9606 GN=PPP1R18 PE=1 SV=1	PPP1R18	0.001	232.787	64	31	75	31	613	67.9
High	P49591	Serine--tRNA ligase, cytoplasmic OS=Homo sapiens (Human) OX=9606 GN=SARS1 PE=1 SV=3	SARS1	0.001	229.653	57	31	165	31	514	58.7
High	Q8WU90	Zinc finger CCCH domain-containing protein 15 OS=Homo sapiens (Human) OX=9606 GN=ZC3H15 PE=1 SV=1	ZC3H15	0.001	227.789	64	31	113	31	426	48.6
High	O00139	Kinesin-like protein KIF2A OS=Homo sapiens (Human) OX=9606 GN=KIF2A PE=1 SV=3	KIF2A	0.001	219.065	51	31	103	31	706	79.9
High	P36871	Phosphoglucomutase-1 OS=Homo sapiens (Human) OX=9606 GN=PGM1 PE=1 SV=3	PGM1	0.001	214.063	63	31	119	31	562	61.4
High	O94973	AP-2 complex subunit alpha-2 OS=Homo sapiens (Human) OX=9606 GN=AP2A2 PE=1 SV=2	AP2A2	0.001	213.023	37	31	128	31	939	103.9
High	O60462	Neuropilin-2 OS=Homo sapiens (Human) OX=9606 GN=NRP2 PE=1 SV=3	NRP2	0.001	212.639	45	31	103	31	931	104.8
High	Q8WTW3	Conserved oligomeric Golgi complex subunit 1 OS=Homo sapiens (Human) OX=9606 GN=COG1 PE=1 SV=1	COG1	0.001	202.655	36	31	84	31	980	108.9
High	Q9UPN9	E3 ubiquitin-protein ligase TRIM33 OS=Homo sapiens (Human) OX=9606 GN=TRIM33 PE=1 SV=3	TRIM33	0.001	200.954	36	31	77	31	1127	122.5
High	P53992	Protein transport protein Sec24C OS=Homo sapiens (Human) OX=9606 GN=SEC24C PE=1 SV=3	SEC24C	0.001	200.578	37	31	115	31	1094	118.2
High	Q7Z392	Trafficking protein particle complex subunit 11 OS=Homo sapiens (Human) OX=9606 GN=TRAPPC11 PE=1 SV=2	TRAPPC11	0.001	191.748	33	31	75	31	1133	128.8
High	Q9UH65	Switch-associated protein 70 OS=Homo sapiens (Human) OX=9606 GN=SWAP70 PE=1 SV=1	SWAP70	0.001	178.201	51	31	80	31	585	69
High	Q9H270	Vacuolar protein sorting-associated protein 11 homolog OS=Homo sapiens (Human) OX=9606 GN=VPS11 PE=1 SV=1	VPS11	0.001	177.457	34	31	77	31	941	107.8
High	Q9H6T3	RNA polymerase II-associated protein 3 OS=Homo sapiens (Human) OX=9606 GN=RPAP3 PE=1 SV=2	RPAP3	0.001	177.089	48	31	84	31	665	75.7
High	Q9H9Y6	DNA-directed RNA polymerase I subunit RPA2 OS=Homo sapiens (Human) OX=9606 GN=POLR1B PE=1 SV=2	POLR1B	0.001	174.246	28	31	73	31	1135	128.1
High	Q9H0E9	Bromodomain-containing protein 8 OS=Homo sapiens (Human) OX=9606 GN=BRD8 PE=1 SV=2	BRD8	0.001	173.923	32	31	62	31	1235	135.3
High	Q96RP9	Elongation factor G, mitochondrial OS=Homo sapiens (Human) OX=9606 GN=GFM1 PE=1 SV=2	GFM1	0.001	173.302	46	31	86	31	751	83.4
High	Q02241	Kinesin-like protein KIF23 OS=Homo sapiens (Human) OX=9606 GN=KIF23 PE=1 SV=3	KIF23	0.001	172.847	38	31	72	31	960	110
High	Q14247	Src substrate cortactin OS=Homo sapiens (Human) OX=9606 GN=CTTN PE=1 SV=2	CTTN	0.001	172.015	71	31	73	31	550	61.5
High	P54764	Ephrin type-A receptor 4 OS=Homo sapiens (Human) OX=9606 GN=EPHA4 PE=1 SV=1	EPHA4	0.001	168.552	46	31	67	31	986	109.8
High	Q9Y2H6	Fibronectin type-III domain-containing protein 3A OS=Homo sapiens (Human) OX=9606 GN=FNDC3A PE=1 SV=4	FNDC3A	0.001	166.588	41	31	91	31	1198	131.8
High	P33981	Dual specificity protein kinase TTK OS=Homo sapiens (Human) OX=9606 GN=TTK PE=1 SV=2	TTK	0.001	165.907	43	31	68	31	857	97
High	Q9NXE4	Sphingomyelin phosphodiesterase 4 OS=Homo sapiens (Human) OX=9606 GN=SMPD4 PE=1 SV=3	SMPD4	0.001	165.678	39	31	78	31	866	97.7
High	Q6PI48	Aspartate--tRNA ligase, mitochondrial OS=Homo sapiens (Human) OX=9606 GN=DARS2 PE=1 SV=1	DARS2	0.001	164.158	46	31	74	31	645	73.5
High	O60879	Protein diaphanous homolog 2 OS=Homo sapiens (Human) OX=9606 GN=DIAPH2 PE=1 SV=1	DIAPH2	0.001	159.78	27	31	69	31	1101	125.5
High	P32019	Type II inositol 1,4,5-trisphosphate 5-phosphatase OS=Homo sapiens (Human) OX=9606 GN=INPP5B PE=1 SV=4	INPP5B	0.001	157.441	36	31	73	31	993	112.8
High	Q5H9F3	BCL-6 corepressor-like protein 1 OS=Homo sapiens (Human) OX=9606 GN=BCORL1 PE=1 SV=1	BCORL1	0.001	156.969	23	31	60	31	1711	182.4
High	Q9NVM9	Integrator complex subunit 13 OS=Homo sapiens (Human) OX=9606 GN=INTS13 PE=1 SV=2	INTS13	0.001	155.455	46	31	67	31	706	80.2
High	Q76FK4	Nucleolar protein 8 OS=Homo sapiens (Human) OX=9606 GN=NOL8 PE=1 SV=1	NOL8	0.001	155.081	27	31	63	31	1167	131.5
High	Q7Z3J2	VPS35 endosomal protein sorting factor-like OS=Homo sapiens (Human) OX=9606 GN=VPS35L PE=1 SV=2	VPS35L	0.001	154.7	36	31	64	31	963	109.5
High	Q9NUW8	Tyrosyl-DNA phosphodiesterase 1 OS=Homo sapiens (Human) OX=9606 GN=TDP1 PE=1 SV=2	TDP1	0.001	152.406	53	31	66	31	608	68.4
High	P29375	Lysine-specific demethylase 5A OS=Homo sapiens (Human) OX=9606 GN=KDM5A PE=1 SV=3	KDM5A	0.001	148.895	24	31	53	31	1690	192
High	Q9Y6W3	Calpain-7 OS=Homo sapiens (Human) OX=9606 GN=CAPN7 PE=1 SV=1	CAPN7	0.001	148.154	43	31	62	31	813	92.6
High	Q7Z3T8	Zinc finger FYVE domain-containing protein 16 OS=Homo sapiens (Human) OX=9606 GN=ZFYVE16 PE=1 SV=3	ZFYVE16	0.001	144.709	29	31	55	31	1539	168.8
High	Q02040	A-kinase anchor protein 17A OS=Homo sapiens (Human) OX=9606 GN=AKAP17A PE=1 SV=2	AKAP17A	0.001	143.746	38	31	69	31	695	80.7
High	Q96RT1	Erbin OS=Homo sapiens (Human) OX=9606 GN=ERBIN PE=1 SV=2	ERBIN	0.001	138.381	34	31	45	31	1412	158.2
High	Q9Y4D1	Disheveled-associated activator of morphogenesis 1 OS=Homo sapiens (Human) OX=9606 GN=DAAM1 PE=1 SV=2	DAAM1	0.001	137.776	38	31	58	31	1078	123.4
High	Q14667	Protein KIAA0100 OS=Homo sapiens (Human) OX=9606 GN=KIAA0100 PE=1 SV=3	KIAA0100	0.001	136.456	20	31	48	31	2235	253.5
High	Q5VWQ8	Disabled homolog 2-interacting protein OS=Homo sapiens (Human) OX=9606 GN=DAB2IP PE=1 SV=2	DAB2IP	0.001	136.13	32	31	69	31	1189	131.5
High	Q14146	Unhealthy ribosome biogenesis protein 2 homolog OS=Homo sapiens (Human) OX=9606 GN=URB2 PE=1 SV=2	URB2	0.001	134.166	30	31	54	31	1524	170.4
High	Q13009	T-lymphoma invasion and metastasis-inducing protein 1 OS=Homo sapiens (Human) OX=9606 GN=TIAM1 PE=1 SV=2	TIAM1	0.001	133.346	27	31	48	31	1591	177.4
High	Q92545	Transmembrane protein 131 OS=Homo sapiens (Human) OX=9606 GN=TMEM131 PE=1 SV=3	TMEM131	0.001	131.699	22	31	49	31	1883	205
High	P78524	DENN domain-containing protein 2B OS=Homo sapiens (Human) OX=9606 GN=DENND2B PE=1 SV=3	DENND2B	0.001	131.139	37	31	47	31	1137	126.4
High	Q9NQ66	1-phosphatidylinositol 4,5-bisphosphate phosphodiesterase beta-1 OS=Homo sapiens (Human) OX=9606 GN=PLCB1 PE=1 SV=1	PLCB1	0.001	129.264	33	31	49	31	1216	138.5
High	O00411	DNA-directed RNA polymerase, mitochondrial OS=Homo sapiens (Human) OX=9606 GN=POLRMT PE=1 SV=2	POLRMT	0.001	128.617	26	31	46	31	1230	138.5
High	P02458	Collagen alpha-1(II) chain OS=Homo sapiens (Human) OX=9606 GN=COL2A1 PE=1 SV=3	COL2A1	0.001	128.239	34	31	60	31	1487	141.7
High	P18074	General transcription and DNA repair factor IIH helicase subunit XPD OS=Homo sapiens (Human) OX=9606 GN=ERCC2 PE=1 SV=1	ERCC2	0.001	126.924	47	31	62	31	760	86.9
High	P43146	Netrin receptor DCC OS=Homo sapiens (Human) OX=9606 GN=DCC PE=1 SV=2	DCC	0.001	122.557	33	31	53	31	1447	158.4
High	P78357	Contactin-associated protein 1 OS=Homo sapiens (Human) OX=9606 GN=CNTNAP1 PE=1 SV=1	CNTNAP1	0.001	120.242	28	31	44	31	1384	156.2
High	Q8IZD9	Dedicator of cytokinesis protein 3 OS=Homo sapiens (Human) OX=9606 GN=DOCK3 PE=1 SV=1	DOCK3	0.001	118.215	20	31	42	31	2030	233
High	Q9NZM1	Myoferlin OS=Homo sapiens (Human) OX=9606 GN=MYOF PE=1 SV=1	MYOF	0.001	116.565	22	31	50	31	2061	234.6
High	Q96L93	Kinesin-like protein KIF16B OS=Homo sapiens (Human) OX=9606 GN=KIF16B PE=1 SV=2	KIF16B	0.001	108.073	27	31	43	31	1317	151.9
High	Q8NDV7	Trinucleotide repeat-containing gene 6A protein OS=Homo sapiens (Human) OX=9606 GN=TNRC6A PE=1 SV=2	TNRC6A	0.001	107.004	23	31	63	31	1962	210.2
High	Q7Z2Z1	Treslin OS=Homo sapiens (Human) OX=9606 GN=TICRR PE=1 SV=2	TICRR	0.001	103.262	21	31	39	31	1910	210.7
High	Q76NI1	Kinase non-catalytic C-lobe domain-containing protein 1 OS=Homo sapiens (Human) OX=9606 GN=KNDC1 PE=2 SV=2	KNDC1	0.001	93.953	27	31	37	31	1749	191.3
High	P06576	ATP synthase subunit beta, mitochondrial OS=Homo sapiens (Human) OX=9606 GN=ATP5F1B PE=1 SV=3	ATP5F1B	0.006	484.061	81	30	601	30	529	56.5
High	P06733	Alpha-enolase OS=Homo sapiens (Human) OX=9606 GN=ENO1 PE=1 SV=2	ENO1	0.004	415.838	76	30	834	30	434	47.1
High	Q9BPU6	Dihydropyrimidinase-related protein 5 OS=Homo sapiens (Human) OX=9606 GN=DPYSL5 PE=1 SV=1	DPYSL5	0.003	349.772	59	30	273	30	564	61.4
High	P34897	Serine hydroxymethyltransferase, mitochondrial OS=Homo sapiens (Human) OX=9606 GN=SHMT2 PE=1 SV=3	SHMT2	0.002	343.089	59	30	239	30	504	56
High	P23526	Adenosylhomocysteinase OS=Homo sapiens (Human) OX=9606 GN=AHCY PE=1 SV=4	AHCY	0.002	337.318	59	30	294	30	432	47.7
High	P62191	26S proteasome regulatory subunit 4 OS=Homo sapiens (Human) OX=9606 GN=PSMC1 PE=1 SV=1	PSMC1	0.002	324.057	63	30	268	30	440	49.2
High	Q96P70	Importin-9 OS=Homo sapiens (Human) OX=9606 GN=IPO9 PE=1 SV=3	IPO9	0.002	318.89	32	30	242	30	1041	115.9
High	P20042	Eukaryotic translation initiation factor 2 subunit 2 OS=Homo sapiens (Human) OX=9606 GN=EIF2S2 PE=1 SV=2	EIF2S2	0.002	315.188	67	30	186	30	333	38.4
High	P11172	Uridine 5'-monophosphate synthase OS=Homo sapiens (Human) OX=9606 GN=UMPS PE=1 SV=1	UMPS	0.002	294.19	66	30	134	30	480	52.2
High	P15170	Eukaryotic peptide chain release factor GTP-binding subunit ERF3A OS=Homo sapiens (Human) OX=9606 GN=GSPT1 PE=1 SV=1	GSPT1	0.002	289.222	58	30	178	30	499	55.7
High	P00338	L-lactate dehydrogenase A chain OS=Homo sapiens (Human) OX=9606 GN=LDHA PE=1 SV=2	LDHA	0.002	278.021	66	30	264	30	332	36.7
High	Q08945	FACT complex subunit SSRP1 OS=Homo sapiens (Human) OX=9606 GN=SSRP1 PE=1 SV=1	SSRP1	0.001	256.92	48	30	194	30	709	81
High	Q15003	Condensin complex subunit 2 OS=Homo sapiens (Human) OX=9606 GN=NCAPH PE=1 SV=3	NCAPH	0.001	255.172	50	30	124	30	741	82.5
High	Q5SSJ5	Heterochromatin protein 1-binding protein 3 OS=Homo sapiens (Human) OX=9606 GN=HP1BP3 PE=1 SV=1	HP1BP3	0.001	248.525	58	30	151	30	553	61.2
High	Q15008	26S proteasome non-ATPase regulatory subunit 6 OS=Homo sapiens (Human) OX=9606 GN=PSMD6 PE=1 SV=1	PSMD6	0.001	245.88	57	30	158	30	389	45.5
High	P17812	CTP synthase 1 OS=Homo sapiens (Human) OX=9606 GN=CTPS1 PE=1 SV=2	CTPS1	0.001	245.044	56	30	130	30	591	66.6
High	O43747	AP-1 complex subunit gamma-1 OS=Homo sapiens (Human) OX=9606 GN=AP1G1 PE=1 SV=5	AP1G1	0.001	236.428	44	30	118	30	822	91.3
High	P55010	Eukaryotic translation initiation factor 5 OS=Homo sapiens (Human) OX=9606 GN=EIF5 PE=1 SV=2	EIF5	0.001	228.758	69	30	157	30	431	49.2
High	P05787	Keratin, type II cytoskeletal 8 OS=Homo sapiens (Human) OX=9606 GN=KRT8 PE=1 SV=7	KRT8	0.001	221.064	63	30	155	30	483	53.7
High	Q9H845	Complex I assembly factor ACAD9, mitochondrial OS=Homo sapiens (Human) OX=9606 GN=ACAD9 PE=1 SV=1	ACAD9	0.001	217.383	46	30	101	30	621	68.7
High	Q9NXG2	THUMP domain-containing protein 1 OS=Homo sapiens (Human) OX=9606 GN=THUMPD1 PE=1 SV=2	THUMPD1	0.001	216.498	71	30	85	30	353	39.3
High	Q8ND82	Zinc finger protein 280C OS=Homo sapiens (Human) OX=9606 GN=ZNF280C PE=1 SV=1	ZNF280C	0.001	214.942	46	30	90	30	737	83
High	P49748	Very long-chain specific acyl-CoA dehydrogenase, mitochondrial OS=Homo sapiens (Human) OX=9606 GN=ACADVL PE=1 SV=1	ACADVL	0.001	213.461	48	30	111	30	655	70.3
High	P49959	Double-strand break repair protein MRE11 OS=Homo sapiens (Human) OX=9606 GN=MRE11 PE=1 SV=3	MRE11	0.001	211.574	56	30	105	30	708	80.5
High	Q01813	ATP-dependent 6-phosphofructokinase, platelet type OS=Homo sapiens (Human) OX=9606 GN=PFKP PE=1 SV=2	PFKP	0.001	205.43	54	30	93	30	784	85.5
High	Q14137	Ribosome biogenesis protein BOP1 OS=Homo sapiens (Human) OX=9606 GN=BOP1 PE=1 SV=2	BOP1	0.001	194.034	50	30	84	30	746	83.6
High	Q8N6R0	eEF1A lysine and N-terminal methyltransferase OS=Homo sapiens (Human) OX=9606 GN=EEF1AKNMT PE=1 SV=1	EEF1AKNMT	0.001	191.608	49	30	85	30	699	78.7
High	P50993	Sodium/potassium-transporting ATPase subunit alpha-2 OS=Homo sapiens (Human) OX=9606 GN=ATP1A2 PE=1 SV=1	ATP1A2	0.001	190.907	37	30	87	30	1020	112.2
High	P05165	Propionyl-CoA carboxylase alpha chain, mitochondrial OS=Homo sapiens (Human) OX=9606 GN=PCCA PE=1 SV=4	PCCA	0.001	190.629	52	30	71	30	728	80
High	Q8WWM7	Ataxin-2-like protein OS=Homo sapiens (Human) OX=9606 GN=ATXN2L PE=1 SV=2	ATXN2L	0.001	190.604	41	30	93	30	1075	113.3
High	Q16512	Serine/threonine-protein kinase N1 OS=Homo sapiens (Human) OX=9606 GN=PKN1 PE=1 SV=2	PKN1	0.001	189.496	42	30	79	30	942	103.9
High	Q8NEB9	Phosphatidylinositol 3-kinase catalytic subunit type 3 OS=Homo sapiens (Human) OX=9606 GN=PIK3C3 PE=1 SV=1	PIK3C3	0.001	187.556	38	30	67	30	887	101.5
High	Q9C0E2	Exportin-4 OS=Homo sapiens (Human) OX=9606 GN=XPO4 PE=1 SV=2	XPO4	0.001	185.812	31	30	74	30	1151	130.1
High	Q9H9T3	Elongator complex protein 3 OS=Homo sapiens (Human) OX=9606 GN=ELP3 PE=1 SV=2	ELP3	0.001	183.067	66	30	98	30	547	62.2
High	Q92609	TBC1 domain family member 5 OS=Homo sapiens (Human) OX=9606 GN=TBC1D5 PE=1 SV=1	TBC1D5	0.001	181.409	48	30	70	30	795	88.9
High	Q8ND04	Protein SMG8 OS=Homo sapiens (Human) OX=9606 GN=SMG8 PE=1 SV=1	SMG8	0.001	180.716	37	30	66	30	991	109.6
High	O76021	Ribosomal L1 domain-containing protein 1 OS=Homo sapiens (Human) OX=9606 GN=RSL1D1 PE=1 SV=3	RSL1D1	0.001	177.939	50	30	119	30	490	54.9
High	Q9NW08	DNA-directed RNA polymerase III subunit RPC2 OS=Homo sapiens (Human) OX=9606 GN=POLR3B PE=1 SV=2	POLR3B	0.001	175.113	29	30	76	30	1133	127.7
High	P48449	Lanosterol synthase OS=Homo sapiens (Human) OX=9606 GN=LSS PE=1 SV=1	LSS	0.001	175.097	45	30	95	30	732	83.3
High	Q6PCE3	Glucose 1,6-bisphosphate synthase OS=Homo sapiens (Human) OX=9606 GN=PGM2L1 PE=1 SV=3	PGM2L1	0.001	174.241	50	30	78	30	622	70.4
High	Q9NV70	Exocyst complex component 1 OS=Homo sapiens (Human) OX=9606 GN=EXOC1 PE=1 SV=4	EXOC1	0.001	171.899	38	30	73	30	894	101.9
High	Q9BZL4	Protein phosphatase 1 regulatory subunit 12C OS=Homo sapiens (Human) OX=9606 GN=PPP1R12C PE=1 SV=1	PPP1R12C	0.001	170.91	48	30	64	30	782	84.8
High	Q13111	Chromatin assembly factor 1 subunit A OS=Homo sapiens (Human) OX=9606 GN=CHAF1A PE=1 SV=3	CHAF1A	0.001	170.274	40	30	64	30	956	106.8
High	Q96BP3	Peptidylprolyl isomerase domain and WD repeat-containing protein 1 OS=Homo sapiens (Human) OX=9606 GN=PPWD1 PE=1 SV=1	PPWD1	0.001	169.931	51	30	79	30	646	73.5
High	Q15386	Ubiquitin-protein ligase E3C OS=Homo sapiens (Human) OX=9606 GN=UBE3C PE=1 SV=3	UBE3C	0.001	166.858	43	30	76	30	1083	123.8
High	Q12959	Disks large homolog 1 OS=Homo sapiens (Human) OX=9606 GN=DLG1 PE=1 SV=2	DLG1	0.001	165.606	42	30	56	30	904	100.4
High	P57678	Gem-associated protein 4 OS=Homo sapiens (Human) OX=9606 GN=GEMIN4 PE=1 SV=2	GEMIN4	0.001	165.433	25	30	82	30	1058	120
High	Q96JJ3	Engulfment and cell motility protein 2 OS=Homo sapiens (Human) OX=9606 GN=ELMO2 PE=1 SV=2	ELMO2	0.001	165.345	47	30	71	30	720	82.6
High	O15226	NF-kappa-B-repressing factor OS=Homo sapiens (Human) OX=9606 GN=NKRF PE=1 SV=2	NKRF	0.001	164.163	40	30	81	30	690	77.6
High	P14543	Nidogen-1 OS=Homo sapiens (Human) OX=9606 GN=NID1 PE=1 SV=3	NID1	0.001	163.137	28	30	63	30	1247	136.3
High	Q96JB2	Conserved oligomeric Golgi complex subunit 3 OS=Homo sapiens (Human) OX=9606 GN=COG3 PE=1 SV=3	COG3	0.001	161.156	39	30	53	30	828	94
High	Q13724	Mannosyl-oligosaccharide glucosidase OS=Homo sapiens (Human) OX=9606 GN=MOGS PE=1 SV=5	MOGS	0.001	160.631	40	30	92	30	837	91.9
High	Q9UHB6	LIM domain and actin-binding protein 1 OS=Homo sapiens (Human) OX=9606 GN=LIMA1 PE=1 SV=1	LIMA1	0.001	159.92	41	30	63	30	759	85.2
High	Q7L7X3	Serine/threonine-protein kinase TAO1 OS=Homo sapiens (Human) OX=9606 GN=TAOK1 PE=1 SV=1	TAOK1	0.001	159.658	30	30	63	30	1001	116
High	Q8NCN5	Pyruvate dehydrogenase phosphatase regulatory subunit, mitochondrial OS=Homo sapiens (Human) OX=9606 GN=PDPR PE=1 SV=2	PDPR	0.001	159.382	41	30	72	30	879	99.3
High	Q5T0N5	Formin-binding protein 1-like OS=Homo sapiens (Human) OX=9606 GN=FNBP1L PE=1 SV=3	FNBP1L	0.001	158.139	50	30	70	30	605	70
High	Q6P3W7	SCY1-like protein 2 OS=Homo sapiens (Human) OX=9606 GN=SCYL2 PE=1 SV=1	SCYL2	0.001	155.518	51	30	68	30	929	103.6
High	Q86YP4	Transcriptional repressor p66-alpha OS=Homo sapiens (Human) OX=9606 GN=GATAD2A PE=1 SV=1	GATAD2A	0.001	154.938	52	30	79	30	633	68
High	O00192	Armadillo repeat protein deleted in velo-cardio-facial syndrome OS=Homo sapiens (Human) OX=9606 GN=ARVCF PE=1 SV=1	ARVCF	0.001	154.299	41	30	61	30	962	104.6
High	E9PAV3	Nascent polypeptide-associated complex subunit alpha, muscle-specific form OS=Homo sapiens (Human) OX=9606 GN=NACA PE=1 SV=1	NACA	0.001	154.009	20	30	116	30	2078	205.3
High	Q6UW63	Protein O-glucosyltransferase 2 OS=Homo sapiens (Human) OX=9606 GN=POGLUT2 PE=1 SV=1	POGLUT2	0.001	152.563	63	30	59	30	502	58
High	P39060	Collagen alpha-1(XVIII) chain OS=Homo sapiens (Human) OX=9606 GN=COL18A1 PE=1 SV=5	COL18A1	0.001	151.012	23	30	72	30	1754	178.1
High	Q8IWV7	E3 ubiquitin-protein ligase UBR1 OS=Homo sapiens (Human) OX=9606 GN=UBR1 PE=1 SV=1	UBR1	0.001	150.845	24	30	55	30	1749	200.1
High	Q86XL3	Ankyrin repeat and LEM domain-containing protein 2 OS=Homo sapiens (Human) OX=9606 GN=ANKLE2 PE=1 SV=4	ANKLE2	0.001	148.933	39	30	61	30	938	104.1
High	Q03188	Centromere protein C OS=Homo sapiens (Human) OX=9606 GN=CENPC PE=1 SV=2	CENPC	0.001	147.992	40	30	64	30	943	106.8
High	Q6BDS2	UHRF1-binding protein 1 OS=Homo sapiens (Human) OX=9606 GN=UHRF1BP1 PE=1 SV=1	UHRF1BP1	0.001	147.338	25	30	55	30	1440	159.4
High	O60343	TBC1 domain family member 4 OS=Homo sapiens (Human) OX=9606 GN=TBC1D4 PE=1 SV=2	TBC1D4	0.001	145.854	29	30	48	30	1298	146.5
High	Q08379	Golgin subfamily A member 2 OS=Homo sapiens (Human) OX=9606 GN=GOLGA2 PE=1 SV=3	GOLGA2	0.001	145.819	48	30	48	30	1002	113
High	Q6DN90	IQ motif and SEC7 domain-containing protein 1 OS=Homo sapiens (Human) OX=9606 GN=IQSEC1 PE=1 SV=1	IQSEC1	0.001	144.686	43	30	70	30	963	108.2
High	Q9UEG4	Zinc finger protein 629 OS=Homo sapiens (Human) OX=9606 GN=ZNF629 PE=1 SV=2	ZNF629	0.001	141.755	45	30	52	30	869	96.6
High	Q14689	Disco-interacting protein 2 homolog A OS=Homo sapiens (Human) OX=9606 GN=DIP2A PE=1 SV=2	DIP2A	0.001	141.606	26	30	64	30	1571	170.3
High	Q2M1P5	Kinesin-like protein KIF7 OS=Homo sapiens (Human) OX=9606 GN=KIF7 PE=1 SV=2	KIF7	0.001	139.472	26	30	49	30	1343	150.5
High	O15066	Kinesin-like protein KIF3B OS=Homo sapiens (Human) OX=9606 GN=KIF3B PE=1 SV=1	KIF3B	0.001	138.617	41	30	48	30	747	85.1
High	Q01433	AMP deaminase 2 OS=Homo sapiens (Human) OX=9606 GN=AMPD2 PE=1 SV=2	AMPD2	0.001	136.805	32	30	70	30	879	100.6
High	Q5M775	Cytospin-B OS=Homo sapiens (Human) OX=9606 GN=SPECC1 PE=1 SV=1	SPECC1	0.001	133.07	30	30	53	30	1068	118.5
High	P29374	AT-rich interactive domain-containing protein 4A OS=Homo sapiens (Human) OX=9606 GN=ARID4A PE=1 SV=3	ARID4A	0.001	132.544	35	30	55	30	1257	142.7
High	P29590	Protein PML OS=Homo sapiens (Human) OX=9606 GN=PML PE=1 SV=3	PML	0.001	132.09	39	30	55	30	882	97.5
High	Q96J02	E3 ubiquitin-protein ligase Itchy homolog OS=Homo sapiens (Human) OX=9606 GN=ITCH PE=1 SV=2	ITCH	0.001	131.558	44	30	54	30	903	102.7
High	Q8TD16	Protein bicaudal D homolog 2 OS=Homo sapiens (Human) OX=9606 GN=BICD2 PE=1 SV=1	BICD2	0.001	130.024	37	30	53	30	824	93.5
High	Q9Y4C8	Probable RNA-binding protein 19 OS=Homo sapiens (Human) OX=9606 GN=RBM19 PE=1 SV=3	RBM19	0.001	129.668	42	30	58	30	960	107.3
High	Q9UMZ2	Synergin gamma OS=Homo sapiens (Human) OX=9606 GN=SYNRG PE=1 SV=2	SYNRG	0.001	129.42	30	30	67	30	1314	140.6
High	Q92833	Protein Jumonji OS=Homo sapiens (Human) OX=9606 GN=JARID2 PE=1 SV=2	JARID2	0.001	129.246	29	30	44	30	1246	138.6
High	O94762	ATP-dependent DNA helicase Q5 OS=Homo sapiens (Human) OX=9606 GN=RECQL5 PE=1 SV=2	RECQL5	0.001	124.585	37	30	40	30	991	108.8
High	O00512	B-cell CLL/lymphoma 9 protein OS=Homo sapiens (Human) OX=9606 GN=BCL9 PE=1 SV=4	BCL9	0.001	123.283	41	30	52	30	1426	149.2
High	Q13615	Myotubularin-related protein 3 OS=Homo sapiens (Human) OX=9606 GN=MTMR3 PE=1 SV=3	MTMR3	0.001	120.905	26	30	47	30	1198	133.5
High	Q92766	Ras-responsive element-binding protein 1 OS=Homo sapiens (Human) OX=9606 GN=RREB1 PE=1 SV=3	RREB1	0.001	119.843	33	30	47	30	1687	181.3
High	Q3B7T1	Erythroid differentiation-related factor 1 OS=Homo sapiens (Human) OX=9606 GN=EDRF1 PE=1 SV=1	EDRF1	0.001	118.214	29	30	60	30	1238	138.4
High	Q8NB91	Fanconi anemia group B protein OS=Homo sapiens (Human) OX=9606 GN=FANCB PE=1 SV=1	FANCB	0.001	117.871	35	30	44	30	859	97.7
High	Q6P0N0	Mis18-binding protein 1 OS=Homo sapiens (Human) OX=9606 GN=MIS18BP1 PE=1 SV=1	MIS18BP1	0.001	116.832	28	30	50	30	1132	129
High	Q8NCD3	Holliday junction recognition protein OS=Homo sapiens (Human) OX=9606 GN=HJURP PE=1 SV=2	HJURP	0.001	116.22	46	30	45	30	748	83.5
High	P46531	Neurogenic locus notch homolog protein 1 OS=Homo sapiens (Human) OX=9606 GN=NOTCH1 PE=1 SV=4	NOTCH1	0.001	114.873	22	30	42	30	2555	272.3
High	O75146	Huntingtin-interacting protein 1-related protein OS=Homo sapiens (Human) OX=9606 GN=HIP1R PE=1 SV=2	HIP1R	0.001	106.184	28	30	42	30	1068	119.3
High	Q6T4R5	Nance-Horan syndrome protein OS=Homo sapiens (Human) OX=9606 GN=NHS PE=1 SV=2	NHS	0.001	105.967	26	30	46	30	1651	179
High	O75096	Low-density lipoprotein receptor-related protein 4 OS=Homo sapiens (Human) OX=9606 GN=LRP4 PE=1 SV=4	LRP4	0.001	104.859	26	30	39	30	1905	211.9
High	Q9BQS8	FYVE and coiled-coil domain-containing protein 1 OS=Homo sapiens (Human) OX=9606 GN=FYCO1 PE=1 SV=3	FYCO1	0.001	104.853	27	30	42	30	1478	166.9
High	Q14571	Inositol 1,4,5-trisphosphate receptor type 2 OS=Homo sapiens (Human) OX=9606 GN=ITPR2 PE=1 SV=2	ITPR2	0.001	103.367	15	30	41	30	2701	307.9
High	P35749	Myosin-11 OS=Homo sapiens (Human) OX=9606 GN=MYH11 PE=1 SV=3	MYH11	0.001	102.316	17	30	41	30	1972	227.2
High	P13942	Collagen alpha-2(XI) chain OS=Homo sapiens (Human) OX=9606 GN=COL11A2 PE=1 SV=5	COL11A2	0.001	95.298	25	30	42	30	1736	171.7
High	A6NC98	Coiled-coil domain-containing protein 88B OS=Homo sapiens (Human) OX=9606 GN=CCDC88B PE=1 SV=1	CCDC88B	0.001	92.821	24	30	42	30	1476	164.7
High	Q6UB98	Ankyrin repeat domain-containing protein 12 OS=Homo sapiens (Human) OX=9606 GN=ANKRD12 PE=1 SV=3	ANKRD12	0.001	90.652	19	30	39	30	2062	235.5
High	Q9Y3S1	Serine/threonine-protein kinase WNK2 OS=Homo sapiens (Human) OX=9606 GN=WNK2 PE=1 SV=4	WNK2	0.001	90.56	21	30	42	30	2297	242.5
High	O43151	Methylcytosine dioxygenase TET3 OS=Homo sapiens (Human) OX=9606 GN=TET3 PE=1 SV=4	TET3	0.001	88.83	24	30	37	30	1795	193.6
High	Q5SXM2	snRNA-activating protein complex subunit 4 OS=Homo sapiens (Human) OX=9606 GN=SNAPC4 PE=1 SV=1	SNAPC4	0.001	87.879	29	30	39	30	1469	159.3
High	Q8NFW1	Collagen alpha-1(XXII) chain OS=Homo sapiens (Human) OX=9606 GN=COL22A1 PE=2 SV=2	COL22A1	0.001	82.223	29	30	36	30	1626	161
High	Q9UM47	Neurogenic locus notch homolog protein 3 OS=Homo sapiens (Human) OX=9606 GN=NOTCH3 PE=1 SV=2	NOTCH3	0.001	56.481	20	30	42	30	2321	243.5
High	P22626	Heterogeneous nuclear ribonucleoproteins A2/B1 OS=Homo sapiens (Human) OX=9606 GN=HNRNPA2B1 PE=1 SV=2	HNRNPA2B1	0.003	391.038	82	29	799	29	353	37.4
High	P26641	Elongation factor 1-gamma OS=Homo sapiens (Human) OX=9606 GN=EEF1G PE=1 SV=3	EEF1G	0.002	284.62	66	29	383	29	437	50.1
High	Q13123	Protein Red OS=Homo sapiens (Human) OX=9606 GN=IK PE=1 SV=3	IK	0.001	260.025	56	29	114	29	557	65.6
High	O60216	Double-strand-break repair protein rad21 homolog OS=Homo sapiens (Human) OX=9606 GN=RAD21 PE=1 SV=2	RAD21	0.001	259.098	51	29	99	29	631	71.6
High	P19022	Cadherin-2 OS=Homo sapiens (Human) OX=9606 GN=CDH2 PE=1 SV=4	CDH2	0.001	251.073	55	29	146	29	906	99.7
High	P00367	Glutamate dehydrogenase 1, mitochondrial OS=Homo sapiens (Human) OX=9606 GN=GLUD1 PE=1 SV=2	GLUD1	0.001	249.284	53	29	262	29	558	61.4
High	P17655	Calpain-2 catalytic subunit OS=Homo sapiens (Human) OX=9606 GN=CAPN2 PE=1 SV=6	CAPN2	0.001	246.519	43	29	105	29	700	79.9
High	Q9BYT8	Neurolysin, mitochondrial OS=Homo sapiens (Human) OX=9606 GN=NLN PE=1 SV=1	NLN	0.001	224.96	45	29	129	29	704	80.6
High	P54578	Ubiquitin carboxyl-terminal hydrolase 14 OS=Homo sapiens (Human) OX=9606 GN=USP14 PE=1 SV=3	USP14	0.001	220.77	58	29	146	29	494	56
High	Q6VMQ6	Activating transcription factor 7-interacting protein 1 OS=Homo sapiens (Human) OX=9606 GN=ATF7IP PE=1 SV=3	ATF7IP	0.001	211.431	32	29	72	29	1270	136.3
High	P13647	Keratin, type II cytoskeletal 5 OS=Homo sapiens (Human) OX=9606 GN=KRT5 PE=1 SV=3	KRT5	0.001	208.201	43	29	129	29	590	62.3
High	Q8WUA4	General transcription factor 3C polypeptide 2 OS=Homo sapiens (Human) OX=9606 GN=GTF3C2 PE=1 SV=2	GTF3C2	0.001	200.907	39	29	103	29	911	100.6
High	P52789	Hexokinase-2 OS=Homo sapiens (Human) OX=9606 GN=HK2 PE=1 SV=2	HK2	0.001	200.834	37	29	103	29	917	102.3
High	Q8TEX9	Importin-4 OS=Homo sapiens (Human) OX=9606 GN=IPO4 PE=1 SV=2	IPO4	0.001	199.525	36	29	103	29	1081	118.6
High	Q8WX92	Negative elongation factor B OS=Homo sapiens (Human) OX=9606 GN=NELFB PE=1 SV=1	NELFB	0.001	195.294	55	29	86	29	580	65.7
High	Q99543	DnaJ homolog subfamily C member 2 OS=Homo sapiens (Human) OX=9606 GN=DNAJC2 PE=1 SV=4	DNAJC2	0.001	192.11	46	29	84	29	621	72
High	P23786	Carnitine O-palmitoyltransferase 2, mitochondrial OS=Homo sapiens (Human) OX=9606 GN=CPT2 PE=1 SV=2	CPT2	0.001	191.051	48	29	83	29	658	73.7
High	Q9NVI7	ATPase family AAA domain-containing protein 3A OS=Homo sapiens (Human) OX=9606 GN=ATAD3A PE=1 SV=2	ATAD3A	0.001	189.402	46	29	103	29	634	71.3
High	P35241	Radixin OS=Homo sapiens (Human) OX=9606 GN=RDX PE=1 SV=1	RDX	0.001	188.442	43	29	126	29	583	68.5
High	Q9BZF1	Oxysterol-binding protein-related protein 8 OS=Homo sapiens (Human) OX=9606 GN=OSBPL8 PE=1 SV=3	OSBPL8	0.001	177.76	44	29	87	29	889	101.1
High	A0FGR8	Extended synaptotagmin-2 OS=Homo sapiens (Human) OX=9606 GN=ESYT2 PE=1 SV=1	ESYT2	0.001	176.161	44	29	71	29	921	102.3
High	O60231	Pre-mRNA-splicing factor ATP-dependent RNA helicase DHX16 OS=Homo sapiens (Human) OX=9606 GN=DHX16 PE=1 SV=2	DHX16	0.001	172.708	32	29	71	29	1041	119.2
High	Q14149	MORC family CW-type zinc finger protein 3 OS=Homo sapiens (Human) OX=9606 GN=MORC3 PE=1 SV=3	MORC3	0.001	172.418	38	29	65	29	939	107
High	Q7Z4V5	Hepatoma-derived growth factor-related protein 2 OS=Homo sapiens (Human) OX=9606 GN=HDGFL2 PE=1 SV=1	HDGFL2	0.001	172.258	40	29	110	29	671	74.3
High	Q09472	Histone acetyltransferase p300 OS=Homo sapiens (Human) OX=9606 GN=EP300 PE=1 SV=2	EP300	0.001	171.162	21	29	74	29	2414	264
High	Q8NEC7	Glutathione S-transferase C-terminal domain-containing protein OS=Homo sapiens (Human) OX=9606 GN=GSTCD PE=1 SV=2	GSTCD	0.001	170.285	55	29	66	29	633	71
High	Q9BWH6	RNA polymerase II-associated protein 1 OS=Homo sapiens (Human) OX=9606 GN=RPAP1 PE=1 SV=3	RPAP1	0.001	169.871	29	29	61	29	1393	152.7
High	Q12872	Splicing factor, suppressor of white-apricot homolog OS=Homo sapiens (Human) OX=9606 GN=SFSWAP PE=1 SV=3	SFSWAP	0.001	164.832	38	29	66	29	951	104.8
High	Q86TB9	Protein PAT1 homolog 1 OS=Homo sapiens (Human) OX=9606 GN=PATL1 PE=1 SV=2	PATL1	0.001	162.899	39	29	72	29	770	86.8
High	Q9Y3Z3	Deoxynucleoside triphosphate triphosphohydrolase SAMHD1 OS=Homo sapiens (Human) OX=9606 GN=SAMHD1 PE=1 SV=2	SAMHD1	0.001	162.461	53	29	73	29	626	72.2
High	Q8IZ21	Phosphatase and actin regulator 4 OS=Homo sapiens (Human) OX=9606 GN=PHACTR4 PE=1 SV=1	PHACTR4	0.001	161.305	43	29	55	29	702	78.2
High	Q9P0U4	CXXC-type zinc finger protein 1 OS=Homo sapiens (Human) OX=9606 GN=CXXC1 PE=1 SV=2	CXXC1	0.001	161.213	52	29	70	29	656	75.7
High	P98175	RNA-binding protein 10 OS=Homo sapiens (Human) OX=9606 GN=RBM10 PE=1 SV=3	RBM10	0.001	158.884	45	29	70	29	930	103.5
High	Q14CX7	N-alpha-acetyltransferase 25, NatB auxiliary subunit OS=Homo sapiens (Human) OX=9606 GN=NAA25 PE=1 SV=1	NAA25	0.001	157.172	31	29	72	29	972	112.2
High	Q6ZSZ5	Rho guanine nucleotide exchange factor 18 OS=Homo sapiens (Human) OX=9606 GN=ARHGEF18 PE=1 SV=4	ARHGEF18	0.001	156.593	34	29	54	29	1361	151.5
High	Q4V328	GRIP1-associated protein 1 OS=Homo sapiens (Human) OX=9606 GN=GRIPAP1 PE=1 SV=2	GRIPAP1	0.001	155.913	35	29	63	29	841	95.9
High	Q9UJX6	Anaphase-promoting complex subunit 2 OS=Homo sapiens (Human) OX=9606 GN=ANAPC2 PE=1 SV=1	ANAPC2	0.001	155.783	39	29	69	29	822	93.8
High	Q01831	DNA repair protein complementing XP-C cells OS=Homo sapiens (Human) OX=9606 GN=XPC PE=1 SV=4	XPC	0.001	155.738	40	29	62	29	940	105.9
High	Q6UB35	Monofunctional C1-tetrahydrofolate synthase, mitochondrial OS=Homo sapiens (Human) OX=9606 GN=MTHFD1L PE=1 SV=1	MTHFD1L	0.001	155.25	30	29	99	29	978	105.7
High	Q9UPN6	SR-related and CTD-associated factor 8 OS=Homo sapiens (Human) OX=9606 GN=SCAF8 PE=1 SV=1	SCAF8	0.001	155.12	24	29	70	29	1271	140.4
High	Q14807	Kinesin-like protein KIF22 OS=Homo sapiens (Human) OX=9606 GN=KIF22 PE=1 SV=5	KIF22	0.001	155.113	55	29	70	29	665	73.2
High	Q96PY5	Formin-like protein 2 OS=Homo sapiens (Human) OX=9606 GN=FMNL2 PE=1 SV=3	FMNL2	0.001	154.808	26	29	59	29	1086	123.2
High	Q9NYH9	U3 small nucleolar RNA-associated protein 6 homolog OS=Homo sapiens (Human) OX=9606 GN=UTP6 PE=2 SV=2	UTP6	0.001	153.241	44	29	73	29	597	70.1
High	Q9NXC5	GATOR complex protein MIOS OS=Homo sapiens (Human) OX=9606 GN=MIOS PE=1 SV=2	MIOS	0.001	149.294	39	29	64	29	875	98.5
High	Q9H269	Vacuolar protein sorting-associated protein 16 homolog OS=Homo sapiens (Human) OX=9606 GN=VPS16 PE=1 SV=2	VPS16	0.001	147.655	41	29	52	29	839	94.6
High	O00462	Beta-mannosidase OS=Homo sapiens (Human) OX=9606 GN=MANBA PE=1 SV=3	MANBA	0.001	147.118	36	29	74	29	879	100.8
High	Q9BVQ7	Spermatogenesis-associated protein 5-like protein 1 OS=Homo sapiens (Human) OX=9606 GN=SPATA5L1 PE=1 SV=2	SPATA5L1	0.001	146.577	47	29	56	29	753	80.7
High	Q2V2M9	FH1/FH2 domain-containing protein 3 OS=Homo sapiens (Human) OX=9606 GN=FHOD3 PE=1 SV=2	FHOD3	0.001	144.273	26	29	56	29	1422	158.5
High	Q9UQR0	Sex comb on midleg-like protein 2 OS=Homo sapiens (Human) OX=9606 GN=SCML2 PE=1 SV=1	SCML2	0.001	143.347	50	29	61	29	700	77.2
High	Q96D71	RalBP1-associated Eps domain-containing protein 1 OS=Homo sapiens (Human) OX=9606 GN=REPS1 PE=1 SV=3	REPS1	0.001	141.752	50	29	58	29	796	86.6
High	Q9NYV4	Cyclin-dependent kinase 12 OS=Homo sapiens (Human) OX=9606 GN=CDK12 PE=1 SV=2	CDK12	0.001	140.436	26	29	53	29	1490	164.1
High	Q8N3P4	Vacuolar protein sorting-associated protein 8 homolog OS=Homo sapiens (Human) OX=9606 GN=VPS8 PE=1 SV=3	VPS8	0.001	139.955	24	29	49	29	1428	161.7
High	Q9H501	ESF1 homolog OS=Homo sapiens (Human) OX=9606 GN=ESF1 PE=1 SV=1	ESF1	0.001	139.683	30	29	63	29	851	98.7
High	Q9Y2K7	Lysine-specific demethylase 2A OS=Homo sapiens (Human) OX=9606 GN=KDM2A PE=1 SV=3	KDM2A	0.001	139.471	29	29	53	29	1162	132.7
High	O94804	Serine/threonine-protein kinase 10 OS=Homo sapiens (Human) OX=9606 GN=STK10 PE=1 SV=1	STK10	0.001	138.487	33	29	45	29	968	112.1
High	Q9BXB4	Oxysterol-binding protein-related protein 11 OS=Homo sapiens (Human) OX=9606 GN=OSBPL11 PE=1 SV=2	OSBPL11	0.001	138.253	42	29	61	29	747	83.6
High	Q9BX63	Fanconi anemia group J protein OS=Homo sapiens (Human) OX=9606 GN=BRIP1 PE=1 SV=2	BRIP1	0.001	132.043	26	29	49	29	1249	140.8
High	Q96PV7	Protein FAM193B OS=Homo sapiens (Human) OX=9606 GN=FAM193B PE=1 SV=3	FAM193B	0.001	129.128	40	29	49	29	902	96.5
High	Q96AE7	Tetratricopeptide repeat protein 17 OS=Homo sapiens (Human) OX=9606 GN=TTC17 PE=1 SV=1	TTC17	0.001	127.322	31	29	45	29	1141	129.5
High	P28715	DNA repair protein complementing XP-G cells OS=Homo sapiens (Human) OX=9606 GN=ERCC5 PE=1 SV=3	ERCC5	0.001	127.18	33	29	52	29	1186	133
High	Q7Z4H7	HAUS augmin-like complex subunit 6 OS=Homo sapiens (Human) OX=9606 GN=HAUS6 PE=1 SV=2	HAUS6	0.001	126.687	37	29	49	29	955	108.6
High	O75054	Immunoglobulin superfamily member 3 OS=Homo sapiens (Human) OX=9606 GN=IGSF3 PE=2 SV=3	IGSF3	0.001	126.639	29	29	51	29	1194	135.1
High	P55201	Peregrin OS=Homo sapiens (Human) OX=9606 GN=BRPF1 PE=1 SV=2	BRPF1	0.001	126.07	29	29	55	29	1214	137.4
High	Q96Q42	Alsin OS=Homo sapiens (Human) OX=9606 GN=ALS2 PE=1 SV=2	ALS2	0.001	124.9	21	29	50	29	1657	183.5
High	Q68D10	Protein SPT2 homolog OS=Homo sapiens (Human) OX=9606 GN=SPTY2D1 PE=1 SV=3	SPTY2D1	0.001	119.889	57	29	47	29	685	75.6
High	Q9Y6J0	Calcineurin-binding protein cabin-1 OS=Homo sapiens (Human) OX=9606 GN=CABIN1 PE=1 SV=1	CABIN1	0.001	117.934	16	29	49	29	2220	246.2
High	Q8WXW3	Progesterone-induced-blocking factor 1 OS=Homo sapiens (Human) OX=9606 GN=PIBF1 PE=1 SV=2	PIBF1	0.001	117.407	36	29	42	29	757	89.8
High	Q9HC77	Centromere protein J OS=Homo sapiens (Human) OX=9606 GN=CENPJ PE=1 SV=2	CENPJ	0.001	115.588	26	29	44	29	1338	152.9
High	O60346	PH domain leucine-rich repeat-containing protein phosphatase 1 OS=Homo sapiens (Human) OX=9606 GN=PHLPP1 PE=1 SV=3	PHLPP1	0.001	110.402	24	29	44	29	1717	184.6
High	Q96HP0	Dedicator of cytokinesis protein 6 OS=Homo sapiens (Human) OX=9606 GN=DOCK6 PE=1 SV=3	DOCK6	0.001	109.587	17	29	46	29	2047	229.4
High	Q96PY6	Serine/threonine-protein kinase Nek1 OS=Homo sapiens (Human) OX=9606 GN=NEK1 PE=1 SV=2	NEK1	0.001	109.488	26	29	44	29	1258	142.7
High	Q7Z3B3	KAT8 regulatory NSL complex subunit 1 OS=Homo sapiens (Human) OX=9606 GN=KANSL1 PE=1 SV=2	KANSL1	0.001	106.347	37	29	47	29	1105	121
High	Q70Z35	Phosphatidylinositol 3,4,5-trisphosphate-dependent Rac exchanger 2 protein OS=Homo sapiens (Human) OX=9606 GN=PREX2 PE=1 SV=1	PREX2	0.001	105.732	21	29	34	29	1606	182.5
High	Q13233	Mitogen-activated protein kinase kinase kinase 1 OS=Homo sapiens (Human) OX=9606 GN=MAP3K1 PE=1 SV=4	MAP3K1	0.001	103.441	28	29	47	29	1512	164.4
High	Q4AC94	C2 domain-containing protein 3 OS=Homo sapiens (Human) OX=9606 GN=C2CD3 PE=1 SV=4	C2CD3	0.001	101.826	18	29	39	29	2353	260.2
High	Q8IXJ9	Polycomb group protein ASXL1 OS=Homo sapiens (Human) OX=9606 GN=ASXL1 PE=1 SV=4	ASXL1	0.001	95.881	30	29	42	29	1541	165.3
High	Q96QB1	Rho GTPase-activating protein 7 OS=Homo sapiens (Human) OX=9606 GN=DLC1 PE=1 SV=4	DLC1	0.001	94.44	26	29	37	29	1528	170.5
High	Q9UPS8	Ankyrin repeat domain-containing protein 26 OS=Homo sapiens (Human) OX=9606 GN=ANKRD26 PE=1 SV=4	ANKRD26	0.001	93.617	18	29	38	29	1710	196.3
High	Q5RHP9	Glutamate-rich protein 3 OS=Homo sapiens (Human) OX=9606 GN=ERICH3 PE=2 SV=1	ERICH3	0.001	86.425	22	29	38	29	1530	168.4
High	O43166	Signal-induced proliferation-associated 1-like protein 1 OS=Homo sapiens (Human) OX=9606 GN=SIPA1L1 PE=1 SV=4	SIPA1L1	0.001	85.937	19	29	39	29	1804	199.9
High	P63261	Actin, cytoplasmic 2 OS=Homo sapiens (Human) OX=9606 GN=ACTG1 PE=1 SV=1	ACTG1	0.007	504.962	74	28	1167	28	375	41.8
High	P27797	Calreticulin OS=Homo sapiens (Human) OX=9606 GN=CALR PE=1 SV=1	CALR	0.004	418.933	60	28	514	28	417	48.1
High	P39023	60S ribosomal protein L3 OS=Homo sapiens (Human) OX=9606 GN=RPL3 PE=1 SV=2	RPL3	0.003	392.024	61	28	467	28	403	46.1
High	P50454	Serpin H1 OS=Homo sapiens (Human) OX=9606 GN=SERPINH1 PE=1 SV=2	SERPINH1	0.002	319.039	60	28	282	28	418	46.4
High	O15355	Protein phosphatase 1G OS=Homo sapiens (Human) OX=9606 GN=PPM1G PE=1 SV=1	PPM1G	0.002	312.241	56	28	172	28	546	59.2
High	Q13838	Spliceosome RNA helicase DDX39B OS=Homo sapiens (Human) OX=9606 GN=DDX39B PE=1 SV=1	DDX39B	0.002	311.611	66	28	460	28	428	49
High	Q9UHX1	Poly(U)-binding-splicing factor PUF60 OS=Homo sapiens (Human) OX=9606 GN=PUF60 PE=1 SV=1	PUF60	0.002	287.29	58	28	191	28	559	59.8
High	P49419	Alpha-aminoadipic semialdehyde dehydrogenase OS=Homo sapiens (Human) OX=9606 GN=ALDH7A1 PE=1 SV=5	ALDH7A1	0.002	283.15	63	28	189	28	539	58.5
High	Q15437	Protein transport protein Sec23B OS=Homo sapiens (Human) OX=9606 GN=SEC23B PE=1 SV=2	SEC23B	0.002	272.718	46	28	149	28	767	86.4
High	Q09161	Nuclear cap-binding protein subunit 1 OS=Homo sapiens (Human) OX=9606 GN=NCBP1 PE=1 SV=1	NCBP1	0.002	266.644	40	28	146	28	790	91.8
High	P00505	Aspartate aminotransferase, mitochondrial OS=Homo sapiens (Human) OX=9606 GN=GOT2 PE=1 SV=3	GOT2	0.001	265.623	53	28	267	28	430	47.5
High	P28838	Cytosol aminopeptidase OS=Homo sapiens (Human) OX=9606 GN=LAP3 PE=1 SV=3	LAP3	0.001	262.198	58	28	142	28	519	56.1
High	P13797	Plastin-3 OS=Homo sapiens (Human) OX=9606 GN=PLS3 PE=1 SV=4	PLS3	0.001	254.725	52	28	136	28	630	70.8
High	O75083	WD repeat-containing protein 1 OS=Homo sapiens (Human) OX=9606 GN=WDR1 PE=1 SV=4	WDR1	0.001	249.54	57	28	263	28	606	66.2
High	P07355	Annexin A2 OS=Homo sapiens (Human) OX=9606 GN=ANXA2 PE=1 SV=2	ANXA2	0.001	239.954	69	28	128	28	339	38.6
High	P17858	ATP-dependent 6-phosphofructokinase, liver type OS=Homo sapiens (Human) OX=9606 GN=PFKL PE=1 SV=6	PFKL	0.001	234.422	41	28	153	28	780	85
High	P09543	2',3'-cyclic-nucleotide 3'-phosphodiesterase OS=Homo sapiens (Human) OX=9606 GN=CNP PE=1 SV=2	CNP	0.001	234.27	57	28	188	28	421	47.5
High	Q12797	Aspartyl/asparaginyl beta-hydroxylase OS=Homo sapiens (Human) OX=9606 GN=ASPH PE=1 SV=3	ASPH	0.001	233.58	46	28	139	28	758	85.8
High	P53041	Serine/threonine-protein phosphatase 5 OS=Homo sapiens (Human) OX=9606 GN=PPP5C PE=1 SV=1	PPP5C	0.001	228.834	53	28	130	28	499	56.8
High	Q9Y450	HBS1-like protein OS=Homo sapiens (Human) OX=9606 GN=HBS1L PE=1 SV=1	HBS1L	0.001	223.477	52	28	83	28	684	75.4
High	Q7L0Y3	tRNA methyltransferase 10 homolog C OS=Homo sapiens (Human) OX=9606 GN=TRMT10C PE=1 SV=2	TRMT10C	0.001	216.628	61	28	118	28	403	47.3
High	Q8WVM8	Sec1 family domain-containing protein 1 OS=Homo sapiens (Human) OX=9606 GN=SCFD1 PE=1 SV=4	SCFD1	0.001	215.629	48	28	115	28	642	72.3
High	O96013	Serine/threonine-protein kinase PAK 4 OS=Homo sapiens (Human) OX=9606 GN=PAK4 PE=1 SV=1	PAK4	0.001	214.502	54	28	104	28	591	64
High	Q9BVP2	Guanine nucleotide-binding protein-like 3 OS=Homo sapiens (Human) OX=9606 GN=GNL3 PE=1 SV=2	GNL3	0.001	212.386	55	28	101	28	549	62
High	P14923	Junction plakoglobin OS=Homo sapiens (Human) OX=9606 GN=JUP PE=1 SV=3	JUP	0.001	208.896	47	28	106	28	745	81.7
High	O60832	H/ACA ribonucleoprotein complex subunit DKC1 OS=Homo sapiens (Human) OX=9606 GN=DKC1 PE=1 SV=3	DKC1	0.001	208.779	43	28	122	28	514	57.6
High	P61011	Signal recognition particle 54 kDa protein OS=Homo sapiens (Human) OX=9606 GN=SRP54 PE=1 SV=1	SRP54	0.001	207.986	59	28	110	28	504	55.7
High	Q9ULV4	Coronin-1C OS=Homo sapiens (Human) OX=9606 GN=CORO1C PE=1 SV=1	CORO1C	0.001	205.265	50	28	166	28	474	53.2
High	Q02818	Nucleobindin-1 OS=Homo sapiens (Human) OX=9606 GN=NUCB1 PE=1 SV=4	NUCB1	0.001	205.07	54	28	90	28	461	53.8
High	P51116	Fragile X mental retardation syndrome-related protein 2 OS=Homo sapiens (Human) OX=9606 GN=FXR2 PE=1 SV=2	FXR2	0.001	202.184	50	28	75	28	673	74.2
High	P46379	Large proline-rich protein BAG6 OS=Homo sapiens (Human) OX=9606 GN=BAG6 PE=1 SV=2	BAG6	0.001	201.554	37	28	87	28	1132	119.3
High	Q9Y6G9	Cytoplasmic dynein 1 light intermediate chain 1 OS=Homo sapiens (Human) OX=9606 GN=DYNC1LI1 PE=1 SV=3	DYNC1LI1	0.001	199.607	53	28	149	28	523	56.5
High	P13798	Acylamino-acid-releasing enzyme OS=Homo sapiens (Human) OX=9606 GN=APEH PE=1 SV=4	APEH	0.001	199.538	48	28	108	28	732	81.2
High	Q9BTE3	Mini-chromosome maintenance complex-binding protein OS=Homo sapiens (Human) OX=9606 GN=MCMBP PE=1 SV=2	MCMBP	0.001	192.704	53	28	95	28	642	72.9
High	Q9UBC2	Epidermal growth factor receptor substrate 15-like 1 OS=Homo sapiens (Human) OX=9606 GN=EPS15L1 PE=1 SV=1	EPS15L1	0.001	191.091	45	28	61	28	864	94.2
High	Q9Y5B6	PAX3- and PAX7-binding protein 1 OS=Homo sapiens (Human) OX=9606 GN=PAXBP1 PE=1 SV=2	PAXBP1	0.001	190.125	39	28	76	28	917	104.7
High	Q9HCD5	Nuclear receptor coactivator 5 OS=Homo sapiens (Human) OX=9606 GN=NCOA5 PE=1 SV=2	NCOA5	0.001	190.038	53	28	88	28	579	65.5
High	Q96AX1	Vacuolar protein sorting-associated protein 33A OS=Homo sapiens (Human) OX=9606 GN=VPS33A PE=1 SV=1	VPS33A	0.001	188.274	51	28	80	28	596	67.6
High	Q96DT7	Zinc finger and BTB domain-containing protein 10 OS=Homo sapiens (Human) OX=9606 GN=ZBTB10 PE=1 SV=2	ZBTB10	0.001	187.017	51	28	70	28	871	94.8
High	P15311	Ezrin OS=Homo sapiens (Human) OX=9606 GN=EZR PE=1 SV=4	EZR	0.001	185.003	36	28	111	28	586	69.4
High	Q9P260	RAB11-binding protein RELCH OS=Homo sapiens (Human) OX=9606 GN=RELCH PE=1 SV=2	RELCH	0.001	182.83	29	28	73	28	1216	134.5
High	P23634	Plasma membrane calcium-transporting ATPase 4 OS=Homo sapiens (Human) OX=9606 GN=ATP2B4 PE=1 SV=2	ATP2B4	0.001	181.18	27	28	67	28	1241	137.8
High	Q9H9A5	CCR4-NOT transcription complex subunit 10 OS=Homo sapiens (Human) OX=9606 GN=CNOT10 PE=1 SV=1	CNOT10	0.001	180.622	47	28	75	28	744	82.3
High	Q27J81	Inverted formin-2 OS=Homo sapiens (Human) OX=9606 GN=INF2 PE=1 SV=2	INF2	0.001	178.405	33	28	66	28	1249	135.5
High	Q9NUQ8	ATP-binding cassette sub-family F member 3 OS=Homo sapiens (Human) OX=9606 GN=ABCF3 PE=1 SV=2	ABCF3	0.001	173.995	46	28	90	28	709	79.7
High	Q99567	Nuclear pore complex protein Nup88 OS=Homo sapiens (Human) OX=9606 GN=NUP88 PE=1 SV=2	NUP88	0.001	173.287	35	28	68	28	741	83.5
High	Q9P2N5	RNA-binding protein 27 OS=Homo sapiens (Human) OX=9606 GN=RBM27 PE=1 SV=2	RBM27	0.001	171.239	28	28	63	28	1060	118.6
High	Q9H9E3	Conserved oligomeric Golgi complex subunit 4 OS=Homo sapiens (Human) OX=9606 GN=COG4 PE=1 SV=3	COG4	0.001	170.571	39	28	63	28	785	89
High	Q9NZ08	Endoplasmic reticulum aminopeptidase 1 OS=Homo sapiens (Human) OX=9606 GN=ERAP1 PE=1 SV=3	ERAP1	0.001	169.892	35	28	67	28	941	107.2
High	Q96ME7	Zinc finger protein 512 OS=Homo sapiens (Human) OX=9606 GN=ZNF512 PE=1 SV=2	ZNF512	0.001	168.098	54	28	81	28	567	64.6
High	Q8WVM7	Cohesin subunit SA-1 OS=Homo sapiens (Human) OX=9606 GN=STAG1 PE=1 SV=3	STAG1	0.001	165.251	25	28	78	28	1258	144.3
High	Q8WUA2	Peptidyl-prolyl cis-trans isomerase-like 4 OS=Homo sapiens (Human) OX=9606 GN=PPIL4 PE=1 SV=1	PPIL4	0.001	164.966	45	28	91	28	492	57.2
High	Q68CZ2	Tensin-3 OS=Homo sapiens (Human) OX=9606 GN=TNS3 PE=1 SV=2	TNS3	0.001	164.493	25	28	74	28	1445	155.2
High	P19447	General transcription and DNA repair factor IIH helicase subunit XPB OS=Homo sapiens (Human) OX=9606 GN=ERCC3 PE=1 SV=1	ERCC3	0.001	164.323	44	28	55	28	782	89.2
High	O95251	Histone acetyltransferase KAT7 OS=Homo sapiens (Human) OX=9606 GN=KAT7 PE=1 SV=1	KAT7	0.001	156.546	57	28	74	28	611	70.6
High	O60508	Pre-mRNA-processing factor 17 OS=Homo sapiens (Human) OX=9606 GN=CDC40 PE=1 SV=1	CDC40	0.001	156.45	51	28	57	28	579	65.5
High	Q9NW13	RNA-binding protein 28 OS=Homo sapiens (Human) OX=9606 GN=RBM28 PE=1 SV=3	RBM28	0.001	155.539	34	28	65	28	759	85.7
High	Q8IWZ8	SURP and G-patch domain-containing protein 1 OS=Homo sapiens (Human) OX=9606 GN=SUGP1 PE=1 SV=2	SUGP1	0.001	153.167	54	28	62	28	645	72.4
High	O14777	Kinetochore protein NDC80 homolog OS=Homo sapiens (Human) OX=9606 GN=NDC80 PE=1 SV=1	NDC80	0.001	152.261	44	28	65	28	642	73.9
High	P22033	Methylmalonyl-CoA mutase, mitochondrial OS=Homo sapiens (Human) OX=9606 GN=MMUT PE=1 SV=4	MMUT	0.001	151.912	47	28	65	28	750	83.1
High	O60942	mRNA-capping enzyme OS=Homo sapiens (Human) OX=9606 GN=RNGTT PE=1 SV=1	RNGTT	0.001	151.589	47	28	55	28	597	68.5
High	Q8NB90	ATPase family protein 2 homolog OS=Homo sapiens (Human) OX=9606 GN=SPATA5 PE=1 SV=3	SPATA5	0.001	150.836	35	28	61	28	893	97.8
High	Q14155	Rho guanine nucleotide exchange factor 7 OS=Homo sapiens (Human) OX=9606 GN=ARHGEF7 PE=1 SV=2	ARHGEF7	0.001	147.907	42	28	68	28	803	90
High	O60645	Exocyst complex component 3 OS=Homo sapiens (Human) OX=9606 GN=EXOC3 PE=1 SV=3	EXOC3	0.001	147.107	41	28	56	28	745	85.5
High	Q9BWT3	Poly(A) polymerase gamma OS=Homo sapiens (Human) OX=9606 GN=PAPOLG PE=1 SV=2	PAPOLG	0.001	145.442	46	28	50	28	736	82.8
High	Q14147	Probable ATP-dependent RNA helicase DHX34 OS=Homo sapiens (Human) OX=9606 GN=DHX34 PE=1 SV=2	DHX34	0.001	144.204	32	28	50	28	1143	128
High	O00534	von Willebrand factor A domain-containing protein 5A OS=Homo sapiens (Human) OX=9606 GN=VWA5A PE=1 SV=2	VWA5A	0.001	142.197	44	28	62	28	786	86.4
High	Q9ULD4	Bromodomain and PHD finger-containing protein 3 OS=Homo sapiens (Human) OX=9606 GN=BRPF3 PE=1 SV=2	BRPF3	0.001	141.283	30	28	49	28	1205	135.7
High	P12755	Ski oncogene OS=Homo sapiens (Human) OX=9606 GN=SKI PE=1 SV=1	SKI	0.001	139.067	41	28	58	28	728	80
High	Q8IX18	Probable ATP-dependent RNA helicase DHX40 OS=Homo sapiens (Human) OX=9606 GN=DHX40 PE=1 SV=2	DHX40	0.001	138.995	36	28	64	28	779	88.5
High	Q9P2L0	WD repeat-containing protein 35 OS=Homo sapiens (Human) OX=9606 GN=WDR35 PE=1 SV=3	WDR35	0.001	138.851	28	28	51	28	1181	133.5
High	P54198	Protein HIRA OS=Homo sapiens (Human) OX=9606 GN=HIRA PE=1 SV=2	HIRA	0.001	136.526	34	28	52	28	1017	111.8
High	Q15397	Pumilio homolog 3 OS=Homo sapiens (Human) OX=9606 GN=PUM3 PE=1 SV=3	PUM3	0.001	135.027	46	28	69	28	648	73.5
High	Q99797	Mitochondrial intermediate peptidase OS=Homo sapiens (Human) OX=9606 GN=MIPEP PE=1 SV=2	MIPEP	0.001	133.201	43	28	58	28	713	80.6
High	Q8IWT6	Volume-regulated anion channel subunit LRRC8A OS=Homo sapiens (Human) OX=9606 GN=LRRC8A PE=1 SV=1	LRRC8A	0.001	132.998	43	28	60	28	810	94.1
High	Q8IYB3	Serine/arginine repetitive matrix protein 1 OS=Homo sapiens (Human) OX=9606 GN=SRRM1 PE=1 SV=2	SRRM1	0.001	132.505	23	28	89	28	904	102.3
High	Q9P2B4	CTTNBP2 N-terminal-like protein OS=Homo sapiens (Human) OX=9606 GN=CTTNBP2NL PE=1 SV=2	CTTNBP2NL	0.001	128.491	42	28	54	28	639	70.1
High	Q15147	1-phosphatidylinositol 4,5-bisphosphate phosphodiesterase beta-4 OS=Homo sapiens (Human) OX=9606 GN=PLCB4 PE=1 SV=3	PLCB4	0.001	125.346	30	28	49	28	1175	134.4
High	Q9NRR4	Ribonuclease 3 OS=Homo sapiens (Human) OX=9606 GN=DROSHA PE=1 SV=2	DROSHA	0.001	124.589	24	28	50	28	1374	159.2
High	O95490	Adhesion G protein-coupled receptor L2 OS=Homo sapiens (Human) OX=9606 GN=ADGRL2 PE=1 SV=2	ADGRL2	0.001	123.813	25	28	53	28	1459	163.2
High	Q99569	Plakophilin-4 OS=Homo sapiens (Human) OX=9606 GN=PKP4 PE=1 SV=2	PKP4	0.001	121.126	33	28	47	28	1192	131.8
High	Q9P275	Ubiquitin carboxyl-terminal hydrolase 36 OS=Homo sapiens (Human) OX=9606 GN=USP36 PE=1 SV=4	USP36	0.001	119.218	31	28	51	28	1123	122.8
High	Q86WG5	Myotubularin-related protein 13 OS=Homo sapiens (Human) OX=9606 GN=SBF2 PE=1 SV=1	SBF2	0.001	116.441	20	28	40	28	1849	208.3
High	Q8IWR0	Zinc finger CCCH domain-containing protein 7A OS=Homo sapiens (Human) OX=9606 GN=ZC3H7A PE=1 SV=1	ZC3H7A	0.001	116.378	37	28	47	28	971	110.5
High	Q9Y6D5	Brefeldin A-inhibited guanine nucleotide-exchange protein 2 OS=Homo sapiens (Human) OX=9606 GN=ARFGEF2 PE=1 SV=3	ARFGEF2	0.001	116.105	17	28	50	28	1785	201.9
High	Q7Z7M0	Multiple epidermal growth factor-like domains protein 8 OS=Homo sapiens (Human) OX=9606 GN=MEGF8 PE=1 SV=2	MEGF8	0.001	115.855	14	28	38	28	2845	302.9
High	Q6PIJ6	F-box only protein 38 OS=Homo sapiens (Human) OX=9606 GN=FBXO38 PE=1 SV=3	FBXO38	0.001	115.274	29	28	43	28	1188	133.9
High	Q567U6	Coiled-coil domain-containing protein 93 OS=Homo sapiens (Human) OX=9606 GN=CCDC93 PE=1 SV=2	CCDC93	0.001	113.124	37	28	45	28	631	73.2
High	Q6P1N0	Coiled-coil and C2 domain-containing protein 1A OS=Homo sapiens (Human) OX=9606 GN=CC2D1A PE=1 SV=1	CC2D1A	0.001	112.899	37	28	45	28	951	104
High	O75037	Kinesin-like protein KIF21B OS=Homo sapiens (Human) OX=9606 GN=KIF21B PE=1 SV=2	KIF21B	0.001	112.856	24	28	45	28	1637	182.5
High	O75164	Lysine-specific demethylase 4A OS=Homo sapiens (Human) OX=9606 GN=KDM4A PE=1 SV=2	KDM4A	0.001	112.599	37	28	53	28	1064	120.6
High	Q9Y3R5	Protein dopey-2 OS=Homo sapiens (Human) OX=9606 GN=DOP1B PE=1 SV=5	DOP1B	0.001	112.035	15	28	40	28	2298	258.1
High	Q9P2Q2	FERM domain-containing protein 4A OS=Homo sapiens (Human) OX=9606 GN=FRMD4A PE=1 SV=3	FRMD4A	0.001	110.725	39	28	37	28	1039	115.4
High	Q9UKA4	A-kinase anchor protein 11 OS=Homo sapiens (Human) OX=9606 GN=AKAP11 PE=1 SV=1	AKAP11	0.001	107.982	18	28	56	28	1901	210.4
High	Q8IWC1	MAP7 domain-containing protein 3 OS=Homo sapiens (Human) OX=9606 GN=MAP7D3 PE=1 SV=2	MAP7D3	0.001	107.91	31	28	41	28	876	98.4
High	Q6IQ23	Pleckstrin homology domain-containing family A member 7 OS=Homo sapiens (Human) OX=9606 GN=PLEKHA7 PE=1 SV=2	PLEKHA7	0.001	106.342	31	28	43	28	1121	127.1
High	Q9ULV0	Unconventional myosin-Vb OS=Homo sapiens (Human) OX=9606 GN=MYO5B PE=1 SV=3	MYO5B	0.001	104.057	16	28	53	28	1848	213.5
High	Q8TEK3	Histone-lysine N-methyltransferase, H3 lysine-79 specific OS=Homo sapiens (Human) OX=9606 GN=DOT1L PE=1 SV=3	DOT1L	0.001	101.518	22	28	45	28	1537	164.8
High	Q86UE8	Serine/threonine-protein kinase tousled-like 2 OS=Homo sapiens (Human) OX=9606 GN=TLK2 PE=1 SV=2	TLK2	0.001	101.486	36	28	57	28	772	87.6
High	Q9HCK4	Roundabout homolog 2 OS=Homo sapiens (Human) OX=9606 GN=ROBO2 PE=1 SV=2	ROBO2	0.001	101.094	27	28	33	28	1378	151.1
High	Q96ST2	Protein IWS1 homolog OS=Homo sapiens (Human) OX=9606 GN=IWS1 PE=1 SV=2	IWS1	0.001	99.43	38	28	70	28	819	91.9
High	Q6ZU80	Centrosomal protein of 128 kDa OS=Homo sapiens (Human) OX=9606 GN=CEP128 PE=1 SV=2	CEP128	0.001	95.748	26	28	32	28	1094	127.9
High	Q6ZNJ1	Neurobeachin-like protein 2 OS=Homo sapiens (Human) OX=9606 GN=NBEAL2 PE=1 SV=2	NBEAL2	0.001	85.126	19	28	43	28	2754	302.3
High	Q5T8A7	Protein phosphatase 1 regulatory subunit 26 OS=Homo sapiens (Human) OX=9606 GN=PPP1R26 PE=1 SV=1	PPP1R26	0.001	78.585	28	28	35	28	1209	127.3
High	P06748	Nucleophosmin OS=Homo sapiens (Human) OX=9606 GN=NPM1 PE=1 SV=2	NPM1	0.004	438.943	82	27	539	27	294	32.6
High	P62258	14-3-3 protein epsilon OS=Homo sapiens (Human) OX=9606 GN=YWHAE PE=1 SV=1	YWHAE	0.004	418.235	76	27	926	27	255	29.2
High	Q16181	Septin-7 OS=Homo sapiens (Human) OX=9606 GN=SEPTIN7 PE=1 SV=2	SEPTIN7	0.002	331.719	56	27	287	27	437	50.6
High	Q9Y266	Nuclear migration protein nudC OS=Homo sapiens (Human) OX=9606 GN=NUDC PE=1 SV=1	NUDC	0.002	292.907	60	27	300	27	331	38.2
High	Q14194	Dihydropyrimidinase-related protein 1 OS=Homo sapiens (Human) OX=9606 GN=CRMP1 PE=1 SV=1	CRMP1	0.002	282.279	61	27	234	27	572	62.1
High	Q8IZL8	Proline-, glutamic acid- and leucine-rich protein 1 OS=Homo sapiens (Human) OX=9606 GN=PELP1 PE=1 SV=2	PELP1	0.002	281.639	35	27	140	27	1130	119.6
High	P48735	Isocitrate dehydrogenase [NADP], mitochondrial OS=Homo sapiens (Human) OX=9606 GN=IDH2 PE=1 SV=2	IDH2	0.002	278.144	52	27	192	27	452	50.9
High	Q9Y617	Phosphoserine aminotransferase OS=Homo sapiens (Human) OX=9606 GN=PSAT1 PE=1 SV=2	PSAT1	0.002	267.021	75	27	255	27	370	40.4
High	O43592	Exportin-T OS=Homo sapiens (Human) OX=9606 GN=XPOT PE=1 SV=2	XPOT	0.001	262.507	34	27	105	27	962	109.9
High	Q9BY44	Eukaryotic translation initiation factor 2A OS=Homo sapiens (Human) OX=9606 GN=EIF2A PE=1 SV=3	EIF2A	0.001	261.109	61	27	108	27	585	64.9
High	P14314	Glucosidase 2 subunit beta OS=Homo sapiens (Human) OX=9606 GN=PRKCSH PE=1 SV=2	PRKCSH	0.001	253.326	65	27	141	27	528	59.4
High	Q13409	Cytoplasmic dynein 1 intermediate chain 2 OS=Homo sapiens (Human) OX=9606 GN=DYNC1I2 PE=1 SV=3	DYNC1I2	0.001	247.982	53	27	149	27	638	71.4
High	Q14166	Tubulin--tyrosine ligase-like protein 12 OS=Homo sapiens (Human) OX=9606 GN=TTLL12 PE=1 SV=2	TTLL12	0.001	242.742	51	27	122	27	644	74.4
High	Q12874	Splicing factor 3A subunit 3 OS=Homo sapiens (Human) OX=9606 GN=SF3A3 PE=1 SV=1	SF3A3	0.001	242.644	54	27	153	27	501	58.8
High	O75821	Eukaryotic translation initiation factor 3 subunit G OS=Homo sapiens (Human) OX=9606 GN=EIF3G PE=1 SV=2	EIF3G	0.001	223.898	67	27	139	27	320	35.6
High	Q9UKF6	Cleavage and polyadenylation specificity factor subunit 3 OS=Homo sapiens (Human) OX=9606 GN=CPSF3 PE=1 SV=1	CPSF3	0.001	217.051	45	27	92	27	684	77.4
High	Q9Y262	Eukaryotic translation initiation factor 3 subunit L OS=Homo sapiens (Human) OX=9606 GN=EIF3L PE=1 SV=1	EIF3L	0.001	216.634	48	27	159	27	564	66.7
High	P35611	Alpha-adducin OS=Homo sapiens (Human) OX=9606 GN=ADD1 PE=1 SV=2	ADD1	0.001	215.296	57	27	106	27	737	80.9
High	Q8N8S7	Protein enabled homolog OS=Homo sapiens (Human) OX=9606 GN=ENAH PE=1 SV=2	ENAH	0.001	211.825	40	27	116	27	591	66.5
High	O43148	mRNA cap guanine-N7 methyltransferase OS=Homo sapiens (Human) OX=9606 GN=RNMT PE=1 SV=1	RNMT	0.001	205.573	56	27	94	27	476	54.8
High	O95104	SR-related and CTD-associated factor 4 OS=Homo sapiens (Human) OX=9606 GN=SCAF4 PE=1 SV=3	SCAF4	0.001	201.697	37	27	84	27	1147	125.8
High	Q9NQW7	Xaa-Pro aminopeptidase 1 OS=Homo sapiens (Human) OX=9606 GN=XPNPEP1 PE=1 SV=3	XPNPEP1	0.001	200.735	58	27	99	27	623	69.9
High	Q9BY77	Polymerase delta-interacting protein 3 OS=Homo sapiens (Human) OX=9606 GN=POLDIP3 PE=1 SV=2	POLDIP3	0.001	199.086	62	27	116	27	421	46.1
High	Q5VSL9	Striatin-interacting protein 1 OS=Homo sapiens (Human) OX=9606 GN=STRIP1 PE=1 SV=1	STRIP1	0.001	198.319	39	27	82	27	837	95.5
High	O43615	Mitochondrial import inner membrane translocase subunit TIM44 OS=Homo sapiens (Human) OX=9606 GN=TIMM44 PE=1 SV=2	TIMM44	0.001	192.582	57	27	110	27	452	51.3
High	O95793	Double-stranded RNA-binding protein Staufen homolog 1 OS=Homo sapiens (Human) OX=9606 GN=STAU1 PE=1 SV=2	STAU1	0.001	190.535	45	27	93	27	577	63.1
High	P48637	Glutathione synthetase OS=Homo sapiens (Human) OX=9606 GN=GSS PE=1 SV=1	GSS	0.001	188.949	51	27	101	27	474	52.4
High	Q16401	26S proteasome non-ATPase regulatory subunit 5 OS=Homo sapiens (Human) OX=9606 GN=PSMD5 PE=1 SV=3	PSMD5	0.001	188.263	71	27	99	27	504	56.2
High	O76031	ATP-dependent Clp protease ATP-binding subunit clpX-like, mitochondrial OS=Homo sapiens (Human) OX=9606 GN=CLPX PE=1 SV=2	CLPX	0.001	187.622	50	27	75	27	633	69.2
High	P13807	Glycogen [starch] synthase, muscle OS=Homo sapiens (Human) OX=9606 GN=GYS1 PE=1 SV=2	GYS1	0.001	185.451	44	27	109	27	737	83.7
High	O14672	Disintegrin and metalloproteinase domain-containing protein 10 OS=Homo sapiens (Human) OX=9606 GN=ADAM10 PE=1 SV=1	ADAM10	0.001	184.948	49	27	82	27	748	84.1
High	Q8NI36	WD repeat-containing protein 36 OS=Homo sapiens (Human) OX=9606 GN=WDR36 PE=1 SV=1	WDR36	0.001	181.862	35	27	75	27	951	105.3
High	P49642	DNA primase small subunit OS=Homo sapiens (Human) OX=9606 GN=PRIM1 PE=1 SV=1	PRIM1	0.001	181.215	60	27	90	27	420	49.9
High	Q8N7H5	RNA polymerase II-associated factor 1 homolog OS=Homo sapiens (Human) OX=9606 GN=PAF1 PE=1 SV=2	PAF1	0.001	179.794	59	27	99	27	531	59.9
High	Q7L1Q6	Basic leucine zipper and W2 domain-containing protein 1 OS=Homo sapiens (Human) OX=9606 GN=BZW1 PE=1 SV=1	BZW1	0.001	178.319	55	27	147	27	419	48
High	Q13769	THO complex subunit 5 homolog OS=Homo sapiens (Human) OX=9606 GN=THOC5 PE=1 SV=2	THOC5	0.001	178.15	38	27	83	27	683	78.5
High	Q9UBL3	Set1/Ash2 histone methyltransferase complex subunit ASH2 OS=Homo sapiens (Human) OX=9606 GN=ASH2L PE=1 SV=1	ASH2L	0.001	175.233	58	27	100	27	628	68.7
High	Q14151	Scaffold attachment factor B2 OS=Homo sapiens (Human) OX=9606 GN=SAFB2 PE=1 SV=1	SAFB2	0.001	170.836	26	27	99	27	953	107.4
High	P29323	Ephrin type-B receptor 2 OS=Homo sapiens (Human) OX=9606 GN=EPHB2 PE=1 SV=5	EPHB2	0.001	170.382	34	27	73	27	1055	117.4
High	Q86XI2	Condensin-2 complex subunit G2 OS=Homo sapiens (Human) OX=9606 GN=NCAPG2 PE=1 SV=1	NCAPG2	0.001	168.836	26	27	59	27	1143	130.9
High	Q14746	Conserved oligomeric Golgi complex subunit 2 OS=Homo sapiens (Human) OX=9606 GN=COG2 PE=1 SV=1	COG2	0.001	168.032	42	27	64	27	738	83.2
High	P40763	Signal transducer and activator of transcription 3 OS=Homo sapiens (Human) OX=9606 GN=STAT3 PE=1 SV=2	STAT3	0.001	167.953	44	27	104	27	770	88
High	Q8NEU8	DCC-interacting protein 13-beta OS=Homo sapiens (Human) OX=9606 GN=APPL2 PE=1 SV=3	APPL2	0.001	167.517	52	27	60	27	664	74.4
High	Q99549	M-phase phosphoprotein 8 OS=Homo sapiens (Human) OX=9606 GN=MPHOSPH8 PE=1 SV=2	MPHOSPH8	0.001	167.515	37	27	70	27	860	97.1
High	Q99661	Kinesin-like protein KIF2C OS=Homo sapiens (Human) OX=9606 GN=KIF2C PE=1 SV=2	KIF2C	0.001	166.24	42	27	71	27	725	81.3
High	Q9UPT5	Exocyst complex component 7 OS=Homo sapiens (Human) OX=9606 GN=EXOC7 PE=1 SV=3	EXOC7	0.001	164.967	45	27	64	27	735	83.3
High	Q9Y5P4	Ceramide transfer protein OS=Homo sapiens (Human) OX=9606 GN=CERT1 PE=1 SV=1	CERT1	0.001	161.848	38	27	81	27	624	70.8
High	O95352	Ubiquitin-like modifier-activating enzyme ATG7 OS=Homo sapiens (Human) OX=9606 GN=ATG7 PE=1 SV=1	ATG7	0.001	161.028	50	27	65	27	703	77.9
High	P10071	Transcriptional activator GLI3 OS=Homo sapiens (Human) OX=9606 GN=GLI3 PE=1 SV=6	GLI3	0.001	160.021	27	27	57	27	1580	169.8	RG
High	P28288	ATP-binding cassette sub-family D member 3 OS=Homo sapiens (Human) OX=9606 GN=ABCD3 PE=1 SV=1	ABCD3	0.001	157.205	42	27	80	27	659	75.4
High	Q13310	Polyadenylate-binding protein 4 OS=Homo sapiens (Human) OX=9606 GN=PABPC4 PE=1 SV=1	PABPC4	0.001	154.133	40	27	81	27	644	70.7
High	Q9Y2X7	ARF GTPase-activating protein GIT1 OS=Homo sapiens (Human) OX=9606 GN=GIT1 PE=1 SV=2	GIT1	0.001	151.338	42	27	71	27	761	84.3
High	Q96EB6	NAD-dependent protein deacetylase sirtuin-1 OS=Homo sapiens (Human) OX=9606 GN=SIRT1 PE=1 SV=2	SIRT1	0.001	148.724	49	27	62	27	747	81.6
High	Q9Y5Q8	General transcription factor 3C polypeptide 5 OS=Homo sapiens (Human) OX=9606 GN=GTF3C5 PE=1 SV=2	GTF3C5	0.001	148.517	54	27	94	27	519	59.5
High	Q15057	Arf-GAP with coiled-coil, ANK repeat and PH domain-containing protein 2 OS=Homo sapiens (Human) OX=9606 GN=ACAP2 PE=1 SV=3	ACAP2	0.001	147.557	38	27	61	27	778	88
High	O00541	Pescadillo homolog OS=Homo sapiens (Human) OX=9606 GN=PES1 PE=1 SV=1	PES1	0.001	147.103	42	27	80	27	588	68
High	O15091	Mitochondrial ribonuclease P catalytic subunit OS=Homo sapiens (Human) OX=9606 GN=PRORP PE=1 SV=2	PRORP	0.001	143.117	45	27	67	27	583	67.3
High	O15013	Rho guanine nucleotide exchange factor 10 OS=Homo sapiens (Human) OX=9606 GN=ARHGEF10 PE=1 SV=4	ARHGEF10	0.001	142.667	38	27	50	27	1369	151.5
High	Q9P0V3	SH3 domain-binding protein 4 OS=Homo sapiens (Human) OX=9606 GN=SH3BP4 PE=1 SV=1	SH3BP4	0.001	142.557	32	27	57	27	963	107.4
High	Q9H9J4	Ubiquitin carboxyl-terminal hydrolase 42 OS=Homo sapiens (Human) OX=9606 GN=USP42 PE=1 SV=3	USP42	0.001	142.437	31	27	46	27	1324	145.3
High	Q9NPF5	DNA methyltransferase 1-associated protein 1 OS=Homo sapiens (Human) OX=9606 GN=DMAP1 PE=1 SV=1	DMAP1	0.001	142.399	52	27	64	27	467	53
High	Q92823	Neuronal cell adhesion molecule OS=Homo sapiens (Human) OX=9606 GN=NRCAM PE=1 SV=3	NRCAM	0.001	140.933	33	27	61	27	1304	143.8
High	P32004	Neural cell adhesion molecule L1 OS=Homo sapiens (Human) OX=9606 GN=L1CAM PE=1 SV=2	L1CAM	0.001	140.44	25	27	56	27	1257	139.9
High	Q5T0F9	Coiled-coil and C2 domain-containing protein 1B OS=Homo sapiens (Human) OX=9606 GN=CC2D1B PE=1 SV=1	CC2D1B	0.001	140.421	38	27	61	27	858	94.2
High	Q15031	Probable leucine--tRNA ligase, mitochondrial OS=Homo sapiens (Human) OX=9606 GN=LARS2 PE=1 SV=2	LARS2	0.001	136.9	35	27	77	27	903	101.9
High	A8CG34	Nuclear envelope pore membrane protein POM 121C OS=Homo sapiens (Human) OX=9606 GN=POM121C PE=1 SV=3	POM121C	0.001	134.933	30	27	56	27	1229	125
High	Q9Y2D4	Exocyst complex component 6B OS=Homo sapiens (Human) OX=9606 GN=EXOC6B PE=1 SV=3	EXOC6B	0.001	132.717	37	27	55	27	811	94.1
High	Q96PE3	Inositol polyphosphate-4-phosphatase type I A OS=Homo sapiens (Human) OX=9606 GN=INPP4A PE=1 SV=1	INPP4A	0.001	131.97	37	27	52	27	977	109.9
High	Q86TU7	Actin-histidine N-methyltransferase OS=Homo sapiens (Human) OX=9606 GN=SETD3 PE=1 SV=1	SETD3	0.001	130.29	58	27	57	27	594	67.2
High	P35228	Nitric oxide synthase, inducible OS=Homo sapiens (Human) OX=9606 GN=NOS2 PE=1 SV=2	NOS2	0.001	129.856	26	27	54	27	1153	131
High	Q9Y2J4	Angiomotin-like protein 2 OS=Homo sapiens (Human) OX=9606 GN=AMOTL2 PE=1 SV=3	AMOTL2	0.001	129.713	39	27	50	27	779	85.7
High	Q9UDT6	CAP-Gly domain-containing linker protein 2 OS=Homo sapiens (Human) OX=9606 GN=CLIP2 PE=1 SV=1	CLIP2	0.001	128.15	27	27	55	27	1046	115.8
High	P08069	Insulin-like growth factor 1 receptor OS=Homo sapiens (Human) OX=9606 GN=IGF1R PE=1 SV=1	IGF1R	0.001	125.608	22	27	48	27	1367	154.7
High	P78312	Protein FAM193A OS=Homo sapiens (Human) OX=9606 GN=FAM193A PE=1 SV=2	FAM193A	0.001	124.735	34	27	40	27	1265	139.9
High	Q8IXB1	DnaJ homolog subfamily C member 10 OS=Homo sapiens (Human) OX=9606 GN=DNAJC10 PE=1 SV=2	DNAJC10	0.001	122.555	33	27	53	27	793	91
High	Q9H8V3	Protein ECT2 OS=Homo sapiens (Human) OX=9606 GN=ECT2 PE=1 SV=4	ECT2	0.001	122.521	34	27	50	27	914	103.4
High	Q9C0B7	Transport and Golgi organization protein 6 homolog OS=Homo sapiens (Human) OX=9606 GN=TANGO6 PE=1 SV=2	TANGO6	0.001	122.303	31	27	41	27	1094	120.7
High	Q9UHD2	Serine/threonine-protein kinase TBK1 OS=Homo sapiens (Human) OX=9606 GN=TBK1 PE=1 SV=1	TBK1	0.001	120.524	38	27	58	27	729	83.6
High	Q13107	Ubiquitin carboxyl-terminal hydrolase 4 OS=Homo sapiens (Human) OX=9606 GN=USP4 PE=1 SV=3	USP4	0.001	119.258	38	27	49	27	963	108.5
High	Q9HCB6	Spondin-1 OS=Homo sapiens (Human) OX=9606 GN=SPON1 PE=1 SV=2	SPON1	0.001	119.209	39	27	52	27	807	90.9
High	Q9HBM0	Vezatin OS=Homo sapiens (Human) OX=9606 GN=VEZT PE=1 SV=3	VEZT	0.001	117.146	46	27	45	27	779	88.6
High	Q9H8H2	Probable ATP-dependent RNA helicase DDX31 OS=Homo sapiens (Human) OX=9606 GN=DDX31 PE=1 SV=2	DDX31	0.001	115.448	37	27	49	27	851	94
High	P38935	DNA-binding protein SMUBP-2 OS=Homo sapiens (Human) OX=9606 GN=IGHMBP2 PE=1 SV=3	IGHMBP2	0.001	114.729	33	27	41	27	993	109.1
High	P78536	Disintegrin and metalloproteinase domain-containing protein 17 OS=Homo sapiens (Human) OX=9606 GN=ADAM17 PE=1 SV=1	ADAM17	0.001	113.373	39	27	50	27	824	93
High	P42694	Probable helicase with zinc finger domain OS=Homo sapiens (Human) OX=9606 GN=HELZ PE=1 SV=2	HELZ	0.001	113.249	20	27	42	27	1942	218.8
High	Q96TA1	Protein Niban 2 OS=Homo sapiens (Human) OX=9606 GN=NIBAN2 PE=1 SV=3	NIBAN2	0.001	112.667	38	27	55	27	746	84.1
High	Q86VV8	Rotatin OS=Homo sapiens (Human) OX=9606 GN=RTTN PE=1 SV=3	RTTN	0.001	112.006	17	27	42	27	2226	248.5
High	Q14112	Nidogen-2 OS=Homo sapiens (Human) OX=9606 GN=NID2 PE=1 SV=3	NID2	0.001	111.696	28	27	40	27	1375	151.2
High	Q13415	Origin recognition complex subunit 1 OS=Homo sapiens (Human) OX=9606 GN=ORC1 PE=1 SV=2	ORC1	0.001	111.039	35	27	49	27	861	97.3
High	P49848	Transcription initiation factor TFIID subunit 6 OS=Homo sapiens (Human) OX=9606 GN=TAF6 PE=1 SV=1	TAF6	0.001	111.027	47	27	50	27	677	72.6
High	Q96RU2	Ubiquitin carboxyl-terminal hydrolase 28 OS=Homo sapiens (Human) OX=9606 GN=USP28 PE=1 SV=1	USP28	0.001	110.197	32	27	42	27	1077	122.4
High	P51530	DNA replication ATP-dependent helicase/nuclease DNA2 OS=Homo sapiens (Human) OX=9606 GN=DNA2 PE=1 SV=3	DNA2	0.001	109.022	31	27	42	27	1060	120.3
High	Q9HAW4	Claspin OS=Homo sapiens (Human) OX=9606 GN=CLSPN PE=1 SV=3	CLSPN	0.001	108.284	26	27	52	27	1339	151
High	Q9UQB8	Brain-specific angiogenesis inhibitor 1-associated protein 2 OS=Homo sapiens (Human) OX=9606 GN=BAIAP2 PE=1 SV=1	BAIAP2	0.001	107.774	49	27	55	27	552	60.8
High	Q504Q3	PAN2-PAN3 deadenylation complex catalytic subunit PAN2 OS=Homo sapiens (Human) OX=9606 GN=PAN2 PE=1 SV=3	PAN2	0.001	107.472	28	27	49	27	1202	135.3
High	Q96KM6	Zinc finger protein 512B OS=Homo sapiens (Human) OX=9606 GN=ZNF512B PE=1 SV=1	ZNF512B	0.001	106.311	39	27	39	27	892	97.2
High	Q92610	Zinc finger protein 592 OS=Homo sapiens (Human) OX=9606 GN=ZNF592 PE=1 SV=2	ZNF592	0.001	97.807	33	27	44	27	1267	137.4
High	Q03468	DNA excision repair protein ERCC-6 OS=Homo sapiens (Human) OX=9606 GN=ERCC6 PE=1 SV=1	ERCC6	0.001	97.399	25	27	33	27	1493	168.3
High	Q9H792	Inactive tyrosine-protein kinase PEAK1 OS=Homo sapiens (Human) OX=9606 GN=PEAK1 PE=1 SV=4	PEAK1	0.001	94.128	20	27	34	27	1746	193
High	Q8IVF7	Formin-like protein 3 OS=Homo sapiens (Human) OX=9606 GN=FMNL3 PE=1 SV=3	FMNL3	0.001	94.004	29	27	34	27	1028	117.1
High	Q9C0H9	SRC kinase signaling inhibitor 1 OS=Homo sapiens (Human) OX=9606 GN=SRCIN1 PE=1 SV=4	SRCIN1	0.001	92.784	30	27	41	27	1183	127
High	O75362	Zinc finger protein 217 OS=Homo sapiens (Human) OX=9606 GN=ZNF217 PE=1 SV=1	ZNF217	0.001	90.075	33	27	38	27	1048	115.2
High	P08123	Collagen alpha-2(I) chain OS=Homo sapiens (Human) OX=9606 GN=COL1A2 PE=1 SV=7	COL1A2	0.001	89.445	25	27	44	27	1366	129.2
High	O75140	GATOR complex protein DEPDC5 OS=Homo sapiens (Human) OX=9606 GN=DEPDC5 PE=1 SV=2	DEPDC5	0.001	87.378	23	27	30	27	1603	181.1
High	Q70EL1	Inactive ubiquitin carboxyl-terminal hydrolase 54 OS=Homo sapiens (Human) OX=9606 GN=USP54 PE=1 SV=4	USP54	0.001	85.451	21	27	37	27	1684	187.3
High	Q5TB80	Centrosomal protein of 162 kDa OS=Homo sapiens (Human) OX=9606 GN=CEP162 PE=1 SV=2	CEP162	0.001	84.517	19	27	35	27	1403	161.8
High	P07195	L-lactate dehydrogenase B chain OS=Homo sapiens (Human) OX=9606 GN=LDHB PE=1 SV=2	LDHB	0.003	353.897	64	26	785	26	334	36.6
High	P0DMV9	Heat shock 70 kDa protein 1B OS=Homo sapiens (Human) OX=9606 GN=HSPA1B PE=1 SV=1	HSPA1B	0.002	289.678	45	26	240	26	641	70
High	Q9Y3I0	RNA-splicing ligase RtcB homolog OS=Homo sapiens (Human) OX=9606 GN=RTCB PE=1 SV=1	RTCB	0.002	286.536	61	26	209	26	505	55.2
High	O43175	D-3-phosphoglycerate dehydrogenase OS=Homo sapiens (Human) OX=9606 GN=PHGDH PE=1 SV=4	PHGDH	0.002	282.122	50	26	203	26	533	56.6
High	P40227	T-complex protein 1 subunit zeta OS=Homo sapiens (Human) OX=9606 GN=CCT6A PE=1 SV=3	CCT6A	0.002	270.651	55	26	268	26	531	58
High	P51991	Heterogeneous nuclear ribonucleoprotein A3 OS=Homo sapiens (Human) OX=9606 GN=HNRNPA3 PE=1 SV=2	HNRNPA3	0.001	266.215	65	26	346	26	378	39.6
High	P26196	Probable ATP-dependent RNA helicase DDX6 OS=Homo sapiens (Human) OX=9606 GN=DDX6 PE=1 SV=2	DDX6	0.001	252.485	57	26	188	26	483	54.4
High	P60228	Eukaryotic translation initiation factor 3 subunit E OS=Homo sapiens (Human) OX=9606 GN=EIF3E PE=1 SV=1	EIF3E	0.001	251.594	69	26	197	26	445	52.2
High	Q9UNF1	Melanoma-associated antigen D2 OS=Homo sapiens (Human) OX=9606 GN=MAGED2 PE=1 SV=2	MAGED2	0.001	249.127	47	26	128	26	606	64.9
High	O95831	Apoptosis-inducing factor 1, mitochondrial OS=Homo sapiens (Human) OX=9606 GN=AIFM1 PE=1 SV=1	AIFM1	0.001	247.783	52	26	186	26	613	66.9
High	Q8WXF1	Paraspeckle component 1 OS=Homo sapiens (Human) OX=9606 GN=PSPC1 PE=1 SV=1	PSPC1	0.001	241.192	56	26	147	26	523	58.7
High	Q15084	Protein disulfide-isomerase A6 OS=Homo sapiens (Human) OX=9606 GN=PDIA6 PE=1 SV=1	PDIA6	0.001	239.142	54	26	183	26	440	48.1
High	P36507	Dual specificity mitogen-activated protein kinase kinase 2 OS=Homo sapiens (Human) OX=9606 GN=MAP2K2 PE=1 SV=1	MAP2K2	0.001	237.81	60	26	196	26	400	44.4
High	Q96AY3	Peptidyl-prolyl cis-trans isomerase FKBP10 OS=Homo sapiens (Human) OX=9606 GN=FKBP10 PE=1 SV=1	FKBP10	0.001	232.16	46	26	220	26	582	64.2
High	Q9NTK5	Obg-like ATPase 1 OS=Homo sapiens (Human) OX=9606 GN=OLA1 PE=1 SV=2	OLA1	0.001	231.43	62	26	232	26	396	44.7
High	O43252	Bifunctional 3'-phosphoadenosine 5'-phosphosulfate synthase 1 OS=Homo sapiens (Human) OX=9606 GN=PAPSS1 PE=1 SV=2	PAPSS1	0.001	229.51	46	26	129	26	624	70.8
High	Q9UBB4	Ataxin-10 OS=Homo sapiens (Human) OX=9606 GN=ATXN10 PE=1 SV=1	ATXN10	0.001	219.641	52	26	119	26	475	53.5
High	Q7KZI7	Serine/threonine-protein kinase MARK2 OS=Homo sapiens (Human) OX=9606 GN=MARK2 PE=1 SV=2	MARK2	0.001	200.804	37	26	73	26	788	87.9
High	Q9UBU9	Nuclear RNA export factor 1 OS=Homo sapiens (Human) OX=9606 GN=NXF1 PE=1 SV=1	NXF1	0.001	195.473	50	26	105	26	619	70.1
High	P31040	Succinate dehydrogenase [ubiquinone] flavoprotein subunit, mitochondrial OS=Homo sapiens (Human) OX=9606 GN=SDHA PE=1 SV=2	SDHA	0.001	192.736	52	26	97	26	664	72.6
High	Q53F19	Nuclear cap-binding protein subunit 3 OS=Homo sapiens (Human) OX=9606 GN=NCBP3 PE=1 SV=2	NCBP3	0.001	191.595	50	26	73	26	620	70.5
High	P46063	ATP-dependent DNA helicase Q1 OS=Homo sapiens (Human) OX=9606 GN=RECQL PE=1 SV=3	RECQL	0.001	190.419	42	26	96	26	649	73.4
High	P51692	Signal transducer and activator of transcription 5B OS=Homo sapiens (Human) OX=9606 GN=STAT5B PE=1 SV=2	STAT5B	0.001	190.265	35	26	82	26	787	89.8
High	P35659	Protein DEK OS=Homo sapiens (Human) OX=9606 GN=DEK PE=1 SV=1	DEK	0.001	188.465	44	26	174	26	375	42.6
High	O60684	Importin subunit alpha-7 OS=Homo sapiens (Human) OX=9606 GN=KPNA6 PE=1 SV=1	KPNA6	0.001	187.265	59	26	118	26	536	60
High	O43865	S-adenosylhomocysteine hydrolase-like protein 1 OS=Homo sapiens (Human) OX=9606 GN=AHCYL1 PE=1 SV=2	AHCYL1	0.001	186.132	53	26	157	26	530	58.9
High	Q13451	Peptidyl-prolyl cis-trans isomerase FKBP5 OS=Homo sapiens (Human) OX=9606 GN=FKBP5 PE=1 SV=2	FKBP5	0.001	182.663	57	26	88	26	457	51.2
High	O75874	Isocitrate dehydrogenase [NADP] cytoplasmic OS=Homo sapiens (Human) OX=9606 GN=IDH1 PE=1 SV=2	IDH1	0.001	182.448	62	26	133	26	414	46.6
High	Q9NXV6	CDKN2A-interacting protein OS=Homo sapiens (Human) OX=9606 GN=CDKN2AIP PE=1 SV=3	CDKN2AIP	0.001	182.166	63	26	75	26	580	61.1
High	Q9Y4C2	TRPM8 channel-associated factor 1 OS=Homo sapiens (Human) OX=9606 GN=TCAF1 PE=1 SV=3	TCAF1	0.001	178.228	33	26	102	26	921	102.1
High	O60568	Multifunctional procollagen lysine hydroxylase and glycosyltransferase LH3 OS=Homo sapiens (Human) OX=9606 GN=PLOD3 PE=1 SV=1	PLOD3	0.001	176.787	40	26	88	26	738	84.7
High	O43172	U4/U6 small nuclear ribonucleoprotein Prp4 OS=Homo sapiens (Human) OX=9606 GN=PRPF4 PE=1 SV=2	PRPF4	0.001	175.347	56	26	83	26	522	58.4
High	P08240	Signal recognition particle receptor subunit alpha OS=Homo sapiens (Human) OX=9606 GN=SRPRA PE=1 SV=2	SRPRA	0.001	174.098	49	26	82	26	638	69.8
High	Q08AM6	Protein VAC14 homolog OS=Homo sapiens (Human) OX=9606 GN=VAC14 PE=1 SV=1	VAC14	0.001	167.897	41	26	68	26	782	87.9
High	Q6PCB5	Lysine-specific demethylase RSBN1L OS=Homo sapiens (Human) OX=9606 GN=RSBN1L PE=1 SV=2	RSBN1L	0.001	163.717	34	26	71	26	846	94.8
High	Q9NVH2	Integrator complex subunit 7 OS=Homo sapiens (Human) OX=9606 GN=INTS7 PE=1 SV=1	INTS7	0.001	163.44	30	26	71	26	962	106.8
High	Q5T7N3	KN motif and ankyrin repeat domain-containing protein 4 OS=Homo sapiens (Human) OX=9606 GN=KANK4 PE=1 SV=1	KANK4	0.001	162.285	45	26	54	26	995	107.3
High	Q01973	Inactive tyrosine-protein kinase transmembrane receptor ROR1 OS=Homo sapiens (Human) OX=9606 GN=ROR1 PE=1 SV=2	ROR1	0.001	161.474	50	26	86	26	937	104.2
High	Q96RS0	Trimethylguanosine synthase OS=Homo sapiens (Human) OX=9606 GN=TGS1 PE=1 SV=3	TGS1	0.001	161.436	45	26	51	26	853	96.6
High	Q9H0H0	Integrator complex subunit 2 OS=Homo sapiens (Human) OX=9606 GN=INTS2 PE=1 SV=2	INTS2	0.001	159.38	35	26	70	26	1204	134.2
High	O43823	A-kinase anchor protein 8 OS=Homo sapiens (Human) OX=9606 GN=AKAP8 PE=1 SV=1	AKAP8	0.001	158.434	50	26	68	26	692	76.1
High	Q8TC07	TBC1 domain family member 15 OS=Homo sapiens (Human) OX=9606 GN=TBC1D15 PE=1 SV=2	TBC1D15	0.001	156.62	42	26	70	26	691	79.4
High	Q9Y2W2	WW domain-binding protein 11 OS=Homo sapiens (Human) OX=9606 GN=WBP11 PE=1 SV=1	WBP11	0.001	156.555	40	26	78	26	641	70
High	P49754	Vacuolar protein sorting-associated protein 41 homolog OS=Homo sapiens (Human) OX=9606 GN=VPS41 PE=1 SV=3	VPS41	0.001	153.779	37	26	64	26	854	98.5
High	P49821	NADH dehydrogenase [ubiquinone] flavoprotein 1, mitochondrial OS=Homo sapiens (Human) OX=9606 GN=NDUFV1 PE=1 SV=4	NDUFV1	0.001	152.155	53	26	82	26	464	50.8
High	Q86UE4	Protein LYRIC OS=Homo sapiens (Human) OX=9606 GN=MTDH PE=1 SV=2	MTDH	0.001	151.863	53	26	82	26	582	63.8
High	P25685	DnaJ homolog subfamily B member 1 OS=Homo sapiens (Human) OX=9606 GN=DNAJB1 PE=1 SV=4	DNAJB1	0.001	150.588	70	26	93	26	340	38
High	Q8IYB8	ATP-dependent RNA helicase SUPV3L1, mitochondrial OS=Homo sapiens (Human) OX=9606 GN=SUPV3L1 PE=1 SV=1	SUPV3L1	0.001	149.765	33	26	78	26	786	87.9
High	Q9UPT6	C-Jun-amino-terminal kinase-interacting protein 3 OS=Homo sapiens (Human) OX=9606 GN=MAPK8IP3 PE=1 SV=3	MAPK8IP3	0.001	148.405	30	26	51	26	1336	147.4
High	Q9NXH9	tRNA (guanine(26)-N(2))-dimethyltransferase OS=Homo sapiens (Human) OX=9606 GN=TRMT1 PE=1 SV=1	TRMT1	0.001	148.221	47	26	61	26	659	72.2
High	Q9BW92	Threonine--tRNA ligase, mitochondrial OS=Homo sapiens (Human) OX=9606 GN=TARS2 PE=1 SV=1	TARS2	0.001	146.53	43	26	67	26	718	81
High	Q5T7W0	Zinc finger protein 618 OS=Homo sapiens (Human) OX=9606 GN=ZNF618 PE=1 SV=1	ZNF618	0.001	146.419	35	26	57	26	954	104.9
High	Q8WXI9	Transcriptional repressor p66-beta OS=Homo sapiens (Human) OX=9606 GN=GATAD2B PE=1 SV=1	GATAD2B	0.001	146.155	49	26	65	26	593	65.2
High	P46019	Phosphorylase b kinase regulatory subunit alpha, liver isoform OS=Homo sapiens (Human) OX=9606 GN=PHKA2 PE=1 SV=1	PHKA2	0.001	144.648	22	26	64	26	1235	138.3
High	Q9UBG0	C-type mannose receptor 2 OS=Homo sapiens (Human) OX=9606 GN=MRC2 PE=1 SV=2	MRC2	0.001	144.117	23	26	55	26	1479	166.6
High	Q8NE01	Metal transporter CNNM3 OS=Homo sapiens (Human) OX=9606 GN=CNNM3 PE=1 SV=1	CNNM3	0.001	141.866	43	26	52	26	707	76.1
High	P04626	Receptor tyrosine-protein kinase erbB-2 OS=Homo sapiens (Human) OX=9606 GN=ERBB2 PE=1 SV=1	ERBB2	0.001	141.25	27	26	58	26	1255	137.8
High	Q8WYA0	Intraflagellar transport protein 81 homolog OS=Homo sapiens (Human) OX=9606 GN=IFT81 PE=1 SV=1	IFT81	0.001	141.074	41	26	66	26	676	79.7
High	Q9BSC4	Nucleolar protein 10 OS=Homo sapiens (Human) OX=9606 GN=NOL10 PE=1 SV=1	NOL10	0.001	138.451	43	26	57	26	688	80.3
High	Q9UJV9	Probable ATP-dependent RNA helicase DDX41 OS=Homo sapiens (Human) OX=9606 GN=DDX41 PE=1 SV=2	DDX41	0.001	137.876	42	26	63	26	622	69.8
High	P57737	Coronin-7 OS=Homo sapiens (Human) OX=9606 GN=CORO7 PE=1 SV=2	CORO7	0.001	135.545	39	26	60	26	925	100.5
High	Q5TF21	Protein SOGA3 OS=Homo sapiens (Human) OX=9606 GN=SOGA3 PE=3 SV=1	SOGA3	0.001	134.183	31	26	45	26	947	103.1
High	O14920	Inhibitor of nuclear factor kappa-B kinase subunit beta OS=Homo sapiens (Human) OX=9606 GN=IKBKB PE=1 SV=1	IKBKB	0.001	134.132	35	26	47	26	756	86.5
High	P16383	GC-rich sequence DNA-binding factor 2 OS=Homo sapiens (Human) OX=9606 GN=GCFC2 PE=1 SV=2	GCFC2	0.001	133.551	34	26	47	26	781	89.3
High	Q9HBR0	Putative sodium-coupled neutral amino acid transporter 10 OS=Homo sapiens (Human) OX=9606 GN=SLC38A10 PE=1 SV=2	SLC38A10	0.001	132.482	31	26	49	26	1119	119.7
High	O00423	Echinoderm microtubule-associated protein-like 1 OS=Homo sapiens (Human) OX=9606 GN=EML1 PE=1 SV=3	EML1	0.001	132.028	35	26	73	26	815	89.8
High	Q8IYI6	Exocyst complex component 8 OS=Homo sapiens (Human) OX=9606 GN=EXOC8 PE=1 SV=2	EXOC8	0.001	131.351	40	26	52	26	725	81.7
High	Q9GZR1	Sentrin-specific protease 6 OS=Homo sapiens (Human) OX=9606 GN=SENP6 PE=1 SV=2	SENP6	0.001	131.28	28	26	43	26	1112	126.1
High	Q7Z4L5	Tetratricopeptide repeat protein 21B OS=Homo sapiens (Human) OX=9606 GN=TTC21B PE=1 SV=2	TTC21B	0.001	129.272	25	26	46	26	1316	150.8
High	Q53GS7	Nucleoporin GLE1 OS=Homo sapiens (Human) OX=9606 GN=GLE1 PE=1 SV=2	GLE1	0.001	128.579	37	26	62	26	698	79.8
High	P22681	E3 ubiquitin-protein ligase CBL OS=Homo sapiens (Human) OX=9606 GN=CBL PE=1 SV=2	CBL	0.001	127.95	42	26	47	26	906	99.6
High	Q14999	Cullin-7 OS=Homo sapiens (Human) OX=9606 GN=CUL7 PE=1 SV=2	CUL7	0.001	127.737	19	26	49	26	1698	191
High	Q9UDY8	Mucosa-associated lymphoid tissue lymphoma translocation protein 1 OS=Homo sapiens (Human) OX=9606 GN=MALT1 PE=1 SV=1	MALT1	0.001	126.61	39	26	43	26	824	92.2
High	Q9UPR3	Protein SMG5 OS=Homo sapiens (Human) OX=9606 GN=SMG5 PE=1 SV=3	SMG5	0.001	125.761	40	26	36	26	1016	113.9
High	P98194	Calcium-transporting ATPase type 2C member 1 OS=Homo sapiens (Human) OX=9606 GN=ATP2C1 PE=1 SV=3	ATP2C1	0.001	124.309	34	26	51	26	919	100.5
High	Q9BXA9	Sal-like protein 3 OS=Homo sapiens (Human) OX=9606 GN=SALL3 PE=1 SV=2	SALL3	0.001	124.169	34	26	46	26	1300	135.3
High	O75420	GRB10-interacting GYF protein 1 OS=Homo sapiens (Human) OX=9606 GN=GIGYF1 PE=1 SV=2	GIGYF1	0.001	123.967	39	26	46	26	1035	114.5
High	Q5T447	E3 ubiquitin-protein ligase HECTD3 OS=Homo sapiens (Human) OX=9606 GN=HECTD3 PE=1 SV=1	HECTD3	0.001	123.586	41	26	44	26	861	97.1
High	Q96QU8	Exportin-6 OS=Homo sapiens (Human) OX=9606 GN=XPO6 PE=1 SV=1	XPO6	0.001	122.181	33	26	55	26	1125	128.8
High	Q9Y2D5	A-kinase anchor protein 2 OS=Homo sapiens (Human) OX=9606 GN=AKAP2 PE=1 SV=3	AKAP2	0.001	122.039	38	26	44	26	859	94.6
High	Q16352	Alpha-internexin OS=Homo sapiens (Human) OX=9606 GN=INA PE=1 SV=2	INA	0.001	121.458	51	26	62	26	499	55.4
High	P23468	Receptor-type tyrosine-protein phosphatase delta OS=Homo sapiens (Human) OX=9606 GN=PTPRD PE=1 SV=2	PTPRD	0.001	120.021	20	26	44	26	1912	214.6
High	Q5VZE5	N-alpha-acetyltransferase 35, NatC auxiliary subunit OS=Homo sapiens (Human) OX=9606 GN=NAA35 PE=1 SV=1	NAA35	0.001	118.281	40	26	55	26	725	83.6
High	Q6P1M0	Long-chain fatty acid transport protein 4 OS=Homo sapiens (Human) OX=9606 GN=SLC27A4 PE=1 SV=1	SLC27A4	0.001	116.842	46	26	44	26	643	72
High	P04920	Anion exchange protein 2 OS=Homo sapiens (Human) OX=9606 GN=SLC4A2 PE=1 SV=4	SLC4A2	0.001	116.394	27	26	43	26	1241	136.9
High	O95140	Mitofusin-2 OS=Homo sapiens (Human) OX=9606 GN=MFN2 PE=1 SV=3	MFN2	0.001	116.032	38	26	48	26	757	86.3
High	Q9UQB3	Catenin delta-2 OS=Homo sapiens (Human) OX=9606 GN=CTNND2 PE=1 SV=3	CTNND2	0.001	114.296	26	26	43	26	1225	132.6
High	O94901	SUN domain-containing protein 1 OS=Homo sapiens (Human) OX=9606 GN=SUN1 PE=1 SV=3	SUN1	0.001	113.255	42	26	55	26	812	90
High	Q96PU4	E3 ubiquitin-protein ligase UHRF2 OS=Homo sapiens (Human) OX=9606 GN=UHRF2 PE=1 SV=1	UHRF2	0.001	111.731	39	26	47	26	802	89.9
High	O15439	Multidrug resistance-associated protein 4 OS=Homo sapiens (Human) OX=9606 GN=ABCC4 PE=1 SV=3	ABCC4	0.001	111.082	27	26	47	26	1325	149.4
High	Q8TEU7	Rap guanine nucleotide exchange factor 6 OS=Homo sapiens (Human) OX=9606 GN=RAPGEF6 PE=1 SV=2	RAPGEF6	0.001	108.22	22	26	42	26	1601	179.3
High	P57071	PR domain zinc finger protein 15 OS=Homo sapiens (Human) OX=9606 GN=PRDM15 PE=1 SV=4	PRDM15	0.001	107.671	18	26	49	26	1507	169.2
High	Q9C0C7	Activating molecule in BECN1-regulated autophagy protein 1 OS=Homo sapiens (Human) OX=9606 GN=AMBRA1 PE=1 SV=2	AMBRA1	0.001	107.434	32	26	40	26	1298	142.4
High	P53355	Death-associated protein kinase 1 OS=Homo sapiens (Human) OX=9606 GN=DAPK1 PE=1 SV=6	DAPK1	0.001	107.188	24	26	46	26	1430	159.9
High	Q9P1Y6	PHD and RING finger domain-containing protein 1 OS=Homo sapiens (Human) OX=9606 GN=PHRF1 PE=1 SV=3	PHRF1	0.001	103.498	22	26	37	26	1649	178.6
High	P51825	AF4/FMR2 family member 1 OS=Homo sapiens (Human) OX=9606 GN=AFF1 PE=1 SV=1	AFF1	0.001	103.422	32	26	39	26	1210	131.3
High	Q92889	DNA repair endonuclease XPF OS=Homo sapiens (Human) OX=9606 GN=ERCC4 PE=1 SV=3	ERCC4	0.001	102.093	31	26	37	26	916	104.4
High	Q8N5V2	Ephexin-1 OS=Homo sapiens (Human) OX=9606 GN=NGEF PE=1 SV=2	NGEF	0.001	101.612	41	26	43	26	710	82.4
High	P02462	Collagen alpha-1(IV) chain OS=Homo sapiens (Human) OX=9606 GN=COL4A1 PE=1 SV=4	COL4A1	0.001	88.333	24	26	39	26	1669	160.5
High	O43426	Synaptojanin-1 OS=Homo sapiens (Human) OX=9606 GN=SYNJ1 PE=1 SV=2	SYNJ1	0.001	87.448	20	26	35	26	1573	173
High	O60486	Plexin-C1 OS=Homo sapiens (Human) OX=9606 GN=PLXNC1 PE=1 SV=1	PLXNC1	0.001	86.715	20	26	33	26	1568	175.6
High	Q9NXG0	Centlein OS=Homo sapiens (Human) OX=9606 GN=CNTLN PE=1 SV=6	CNTLN	0.001	84.408	18	26	38	26	1405	161.5
High	Q9Y6Q9	Nuclear receptor coactivator 3 OS=Homo sapiens (Human) OX=9606 GN=NCOA3 PE=1 SV=1	NCOA3	0.001	79.844	31	26	36	26	1424	155.2
High	P04406	Glyceraldehyde-3-phosphate dehydrogenase OS=Homo sapiens (Human) OX=9606 GN=GAPDH PE=1 SV=3	GAPDH	0.006	492.813	83	25	1080	25	335	36
High	Q14195	Dihydropyrimidinase-related protein 3 OS=Homo sapiens (Human) OX=9606 GN=DPYSL3 PE=1 SV=1	DPYSL3	0.003	379.069	61	25	419	25	570	61.9
High	P31943	Heterogeneous nuclear ribonucleoprotein H OS=Homo sapiens (Human) OX=9606 GN=HNRNPH1 PE=1 SV=4	HNRNPH1	0.002	342.314	67	25	528	25	449	49.2
High	Q9Y265	RuvB-like 1 OS=Homo sapiens (Human) OX=9606 GN=RUVBL1 PE=1 SV=1	RUVBL1	0.002	297.851	72	25	182	25	456	50.2
High	P61247	40S ribosomal protein S3a OS=Homo sapiens (Human) OX=9606 GN=RPS3A PE=1 SV=2	RPS3A	0.002	291.911	74	25	449	25	264	29.9
High	P51858	Hepatoma-derived growth factor OS=Homo sapiens (Human) OX=9606 GN=HDGF PE=1 SV=1	HDGF	0.002	280.077	76	25	167	25	240	26.8
High	P05091	Aldehyde dehydrogenase, mitochondrial OS=Homo sapiens (Human) OX=9606 GN=ALDH2 PE=1 SV=2	ALDH2	0.002	278.179	59	25	240	25	517	56.3
High	Q12905	Interleukin enhancer-binding factor 2 OS=Homo sapiens (Human) OX=9606 GN=ILF2 PE=1 SV=2	ILF2	0.001	257.063	65	25	286	25	390	43
High	P23396	40S ribosomal protein S3 OS=Homo sapiens (Human) OX=9606 GN=RPS3 PE=1 SV=2	RPS3	0.001	256.051	84	25	383	25	243	26.7
High	O00116	Alkyldihydroxyacetonephosphate synthase, peroxisomal OS=Homo sapiens (Human) OX=9606 GN=AGPS PE=1 SV=1	AGPS	0.001	253.307	52	25	116	25	658	72.9
High	Q9Y6M1	Insulin-like growth factor 2 mRNA-binding protein 2 OS=Homo sapiens (Human) OX=9606 GN=IGF2BP2 PE=1 SV=2	IGF2BP2	0.001	251.811	44	25	151	25	599	66.1
High	Q99623	Prohibitin-2 OS=Homo sapiens (Human) OX=9606 GN=PHB2 PE=1 SV=2	PHB2	0.001	244.509	81	25	205	25	299	33.3
High	P62701	40S ribosomal protein S4, X isoform OS=Homo sapiens (Human) OX=9606 GN=RPS4X PE=1 SV=2	RPS4X	0.001	244.357	70	25	407	25	263	29.6
High	P38919	Eukaryotic initiation factor 4A-III OS=Homo sapiens (Human) OX=9606 GN=EIF4A3 PE=1 SV=4	EIF4A3	0.001	240.451	54	25	221	25	411	46.8
High	Q9H4M9	EH domain-containing protein 1 OS=Homo sapiens (Human) OX=9606 GN=EHD1 PE=1 SV=2	EHD1	0.001	238.211	59	25	127	25	534	60.6
High	Q9BXS5	AP-1 complex subunit mu-1 OS=Homo sapiens (Human) OX=9606 GN=AP1M1 PE=1 SV=3	AP1M1	0.001	237.871	65	25	149	25	423	48.6
High	Q9P2Y4	Zinc finger protein 219 OS=Homo sapiens (Human) OX=9606 GN=ZNF219 PE=1 SV=2	ZNF219	0.001	232.469	48	25	101	25	722	76.8
High	Q9NVA2	Septin-11 OS=Homo sapiens (Human) OX=9606 GN=SEPTIN11 PE=1 SV=3	SEPTIN11	0.001	227.748	54	25	158	25	429	49.4
High	P62195	26S proteasome regulatory subunit 8 OS=Homo sapiens (Human) OX=9606 GN=PSMC5 PE=1 SV=1	PSMC5	0.001	227.103	63	25	273	25	406	45.6
High	Q96CW1	AP-2 complex subunit mu OS=Homo sapiens (Human) OX=9606 GN=AP2M1 PE=1 SV=2	AP2M1	0.001	220.523	62	25	146	25	435	49.6
High	Q8WVV9	Heterogeneous nuclear ribonucleoprotein L-like OS=Homo sapiens (Human) OX=9606 GN=HNRNPLL PE=1 SV=1	HNRNPLL	0.001	219.485	63	25	132	25	542	60
High	O43395	U4/U6 small nuclear ribonucleoprotein Prp3 OS=Homo sapiens (Human) OX=9606 GN=PRPF3 PE=1 SV=2	PRPF3	0.001	219.274	42	25	128	25	683	77.5
High	Q9NY27	Serine/threonine-protein phosphatase 4 regulatory subunit 2 OS=Homo sapiens (Human) OX=9606 GN=PPP4R2 PE=1 SV=3	PPP4R2	0.001	218.866	79	25	79	25	417	46.9
High	O60884	DnaJ homolog subfamily A member 2 OS=Homo sapiens (Human) OX=9606 GN=DNAJA2 PE=1 SV=1	DNAJA2	0.001	218.672	62	25	128	25	412	45.7
High	Q969G3	SWI/SNF-related matrix-associated actin-dependent regulator of chromatin subfamily E member 1 OS=Homo sapiens (Human) OX=9606 GN=SMARCE1 PE=1 SV=2	SMARCE1	0.001	214.256	71	25	118	25	411	46.6
High	Q13564	NEDD8-activating enzyme E1 regulatory subunit OS=Homo sapiens (Human) OX=9606 GN=NAE1 PE=1 SV=1	NAE1	0.001	212.888	63	25	103	25	534	60.2
High	Q9HDC9	Adipocyte plasma membrane-associated protein OS=Homo sapiens (Human) OX=9606 GN=APMAP PE=1 SV=2	APMAP	0.001	211.733	70	25	143	25	416	46.5
High	Q9UMR2	ATP-dependent RNA helicase DDX19B OS=Homo sapiens (Human) OX=9606 GN=DDX19B PE=1 SV=1	DDX19B	0.001	210.857	58	25	157	25	479	53.9
High	P43034	Platelet-activating factor acetylhydrolase IB subunit alpha OS=Homo sapiens (Human) OX=9606 GN=PAFAH1B1 PE=1 SV=2	PAFAH1B1	0.001	205.243	58	25	156	25	410	46.6
High	P23381	Tryptophan--tRNA ligase, cytoplasmic OS=Homo sapiens (Human) OX=9606 GN=WARS1 PE=1 SV=2	WARS1	0.001	203.549	63	25	117	25	471	53.1
High	Q15813	Tubulin-specific chaperone E OS=Homo sapiens (Human) OX=9606 GN=TBCE PE=1 SV=1	TBCE	0.001	202.551	62	25	81	25	527	59.3
High	Q9UNF0	Protein kinase C and casein kinase substrate in neurons protein 2 OS=Homo sapiens (Human) OX=9606 GN=PACSIN2 PE=1 SV=2	PACSIN2	0.001	201.471	58	25	117	25	486	55.7
High	Q9UNH7	Sorting nexin-6 OS=Homo sapiens (Human) OX=9606 GN=SNX6 PE=1 SV=1	SNX6	0.001	194.301	64	25	98	25	406	46.6
High	Q9H4A4	Aminopeptidase B OS=Homo sapiens (Human) OX=9606 GN=RNPEP PE=1 SV=2	RNPEP	0.001	191.274	44	25	132	25	650	72.5
High	O95394	Phosphoacetylglucosamine mutase OS=Homo sapiens (Human) OX=9606 GN=PGM3 PE=1 SV=1	PGM3	0.001	189.512	54	25	95	25	542	59.8
High	P28482	Mitogen-activated protein kinase 1 OS=Homo sapiens (Human) OX=9606 GN=MAPK1 PE=1 SV=3	MAPK1	0.001	188.778	59	25	125	25	360	41.4
High	Q9Y2X3	Nucleolar protein 58 OS=Homo sapiens (Human) OX=9606 GN=NOP58 PE=1 SV=1	NOP58	0.001	187.968	46	25	129	25	529	59.5
High	P10412	Histone H1.4 OS=Homo sapiens (Human) OX=9606 GN=H1-4 PE=1 SV=2	H1-4	0.001	186.687	57	25	534	25	219	21.9
High	O94826	Mitochondrial import receptor subunit TOM70 OS=Homo sapiens (Human) OX=9606 GN=TOMM70 PE=1 SV=1	TOMM70	0.001	185.487	41	25	98	25	608	67.4
High	Q9UL18	Protein argonaute-1 OS=Homo sapiens (Human) OX=9606 GN=AGO1 PE=1 SV=3	AGO1	0.001	183.601	37	25	82	25	857	97.2
High	P37837	Transaldolase OS=Homo sapiens (Human) OX=9606 GN=TALDO1 PE=1 SV=2	TALDO1	0.001	181.673	59	25	150	25	337	37.5
High	Q9NTZ6	RNA-binding protein 12 OS=Homo sapiens (Human) OX=9606 GN=RBM12 PE=1 SV=1	RBM12	0.001	181.041	27	25	118	25	932	97.3
High	Q02252	Methylmalonate-semialdehyde dehydrogenase [acylating], mitochondrial OS=Homo sapiens (Human) OX=9606 GN=ALDH6A1 PE=1 SV=2	ALDH6A1	0.001	178.91	66	25	101	25	535	57.8
High	Q6P996	Pyridoxal-dependent decarboxylase domain-containing protein 1 OS=Homo sapiens (Human) OX=9606 GN=PDXDC1 PE=1 SV=2	PDXDC1	0.001	178.127	43	25	73	25	788	86.7
High	P17174	Aspartate aminotransferase, cytoplasmic OS=Homo sapiens (Human) OX=9606 GN=GOT1 PE=1 SV=3	GOT1	0.001	175.556	69	25	116	25	413	46.2
High	Q8NBJ5	Procollagen galactosyltransferase 1 OS=Homo sapiens (Human) OX=9606 GN=COLGALT1 PE=1 SV=1	COLGALT1	0.001	175.142	37	25	99	25	622	71.6
High	Q9HCM4	Band 4.1-like protein 5 OS=Homo sapiens (Human) OX=9606 GN=EPB41L5 PE=1 SV=3	EPB41L5	0.001	171.629	41	25	89	25	733	81.8
High	P82933	28S ribosomal protein S9, mitochondrial OS=Homo sapiens (Human) OX=9606 GN=MRPS9 PE=1 SV=2	MRPS9	0.001	171.452	55	25	69	25	396	45.8
High	Q02809	Procollagen-lysine,2-oxoglutarate 5-dioxygenase 1 OS=Homo sapiens (Human) OX=9606 GN=PLOD1 PE=1 SV=2	PLOD1	0.001	170.862	41	25	92	25	727	83.5
High	Q9BZE9	Tether containing UBX domain for GLUT4 OS=Homo sapiens (Human) OX=9606 GN=ASPSCR1 PE=1 SV=1	ASPSCR1	0.001	170.78	61	25	67	25	553	60.1
High	Q2M1K9	Zinc finger protein 423 OS=Homo sapiens (Human) OX=9606 GN=ZNF423 PE=1 SV=1	ZNF423	0.001	167.015	27	25	72	25	1284	144.5
High	O95573	Long-chain-fatty-acid--CoA ligase 3 OS=Homo sapiens (Human) OX=9606 GN=ACSL3 PE=1 SV=3	ACSL3	0.001	161.184	50	25	78	25	720	80.4
High	Q92925	SWI/SNF-related matrix-associated actin-dependent regulator of chromatin subfamily D member 2 OS=Homo sapiens (Human) OX=9606 GN=SMARCD2 PE=1 SV=3	SMARCD2	0.001	160.776	53	25	73	25	531	58.9
High	Q96JC1	Vam6/Vps39-like protein OS=Homo sapiens (Human) OX=9606 GN=VPS39 PE=1 SV=2	VPS39	0.001	157.639	34	25	61	25	886	101.7
High	Q9BV44	THUMP domain-containing protein 3 OS=Homo sapiens (Human) OX=9606 GN=THUMPD3 PE=1 SV=1	THUMPD3	0.001	156.624	48	25	54	25	507	57
High	Q05209	Tyrosine-protein phosphatase non-receptor type 12 OS=Homo sapiens (Human) OX=9606 GN=PTPN12 PE=1 SV=3	PTPN12	0.001	156.185	44	25	59	25	780	88.1
High	Q96MU7	YTH domain-containing protein 1 OS=Homo sapiens (Human) OX=9606 GN=YTHDC1 PE=1 SV=3	YTHDC1	0.001	154.274	34	25	73	25	727	84.6
High	Q15910	Histone-lysine N-methyltransferase EZH2 OS=Homo sapiens (Human) OX=9606 GN=EZH2 PE=1 SV=2	EZH2	0.001	152.794	36	25	55	25	746	85.3
High	Q13033	Striatin-3 OS=Homo sapiens (Human) OX=9606 GN=STRN3 PE=1 SV=3	STRN3	0.001	152.677	40	25	66	25	797	87.2
High	Q8IWA0	WD repeat-containing protein 75 OS=Homo sapiens (Human) OX=9606 GN=WDR75 PE=1 SV=1	WDR75	0.001	152.647	33	25	49	25	830	94.4
High	Q9NQX3	Gephyrin OS=Homo sapiens (Human) OX=9606 GN=GPHN PE=1 SV=1	GPHN	0.001	150.67	42	25	57	25	736	79.7
High	P49902	Cytosolic purine 5'-nucleotidase OS=Homo sapiens (Human) OX=9606 GN=NT5C2 PE=1 SV=1	NT5C2	0.001	150.402	50	25	73	25	561	64.9
High	P55285	Cadherin-6 OS=Homo sapiens (Human) OX=9606 GN=CDH6 PE=1 SV=1	CDH6	0.001	149.041	32	25	69	25	790	88.3
High	Q9NW82	WD repeat-containing protein 70 OS=Homo sapiens (Human) OX=9606 GN=WDR70 PE=1 SV=1	WDR70	0.001	146.146	49	25	93	25	654	73.2
High	O95985	DNA topoisomerase 3-beta-1 OS=Homo sapiens (Human) OX=9606 GN=TOP3B PE=1 SV=1	TOP3B	0.001	144.207	38	25	53	25	862	96.6
High	Q14139	Ubiquitin conjugation factor E4 A OS=Homo sapiens (Human) OX=9606 GN=UBE4A PE=1 SV=2	UBE4A	0.001	142.149	33	25	62	25	1066	122.5
High	Q13438	Protein OS-9 OS=Homo sapiens (Human) OX=9606 GN=OS9 PE=1 SV=1	OS9	0.001	140.908	56	25	49	25	667	75.5
High	Q9H6Z4	Ran-binding protein 3 OS=Homo sapiens (Human) OX=9606 GN=RANBP3 PE=1 SV=1	RANBP3	0.001	139.832	52	25	75	25	567	60.2
High	Q8WWK9	Cytoskeleton-associated protein 2 OS=Homo sapiens (Human) OX=9606 GN=CKAP2 PE=1 SV=1	CKAP2	0.001	138.331	39	25	57	25	683	76.9
High	Q9HBG6	Intraflagellar transport protein 122 homolog OS=Homo sapiens (Human) OX=9606 GN=IFT122 PE=1 SV=2	IFT122	0.001	138.045	24	25	61	25	1241	141.7
High	P41240	Tyrosine-protein kinase CSK OS=Homo sapiens (Human) OX=9606 GN=CSK PE=1 SV=1	CSK	0.001	137.573	59	25	71	25	450	50.7
High	Q9NTJ5	Phosphatidylinositol-3-phosphatase SAC1 OS=Homo sapiens (Human) OX=9606 GN=SACM1L PE=1 SV=2	SACM1L	0.001	136.155	43	25	71	25	587	66.9
High	O75113	NEDD4-binding protein 1 OS=Homo sapiens (Human) OX=9606 GN=N4BP1 PE=1 SV=4	N4BP1	0.001	135.921	33	25	56	25	896	100.3
High	O76024	Wolframin OS=Homo sapiens (Human) OX=9606 GN=WFS1 PE=1 SV=2	WFS1	0.001	135.45	30	25	48	25	890	100.2
High	Q8IWW6	Rho GTPase-activating protein 12 OS=Homo sapiens (Human) OX=9606 GN=ARHGAP12 PE=1 SV=1	ARHGAP12	0.001	133.126	35	25	60	25	846	96.2
High	Q16706	Alpha-mannosidase 2 OS=Homo sapiens (Human) OX=9606 GN=MAN2A1 PE=1 SV=2	MAN2A1	0.001	132.74	29	25	54	25	1144	131.1
High	Q9BW19	Kinesin-like protein KIFC1 OS=Homo sapiens (Human) OX=9606 GN=KIFC1 PE=1 SV=2	KIFC1	0.001	132.622	44	25	57	25	673	73.7
High	Q01804	OTU domain-containing protein 4 OS=Homo sapiens (Human) OX=9606 GN=OTUD4 PE=1 SV=4	OTUD4	0.001	131.892	25	25	53	25	1114	124
High	P25440	Bromodomain-containing protein 2 OS=Homo sapiens (Human) OX=9606 GN=BRD2 PE=1 SV=2	BRD2	0.001	131.807	35	25	47	25	801	88
High	P30260	Cell division cycle protein 27 homolog OS=Homo sapiens (Human) OX=9606 GN=CDC27 PE=1 SV=2	CDC27	0.001	130.454	38	25	52	25	824	91.8
High	Q14241	Elongin-A OS=Homo sapiens (Human) OX=9606 GN=ELOA PE=1 SV=2	ELOA	0.001	130.016	39	25	51	25	798	89.9
High	Q9UP83	Conserved oligomeric Golgi complex subunit 5 OS=Homo sapiens (Human) OX=9606 GN=COG5 PE=1 SV=3	COG5	0.001	129.148	35	25	56	25	839	92.7
High	Q9Y2X0	Mediator of RNA polymerase II transcription subunit 16 OS=Homo sapiens (Human) OX=9606 GN=MED16 PE=1 SV=2	MED16	0.001	127.595	33	25	51	25	877	96.7
High	Q9BQF6	Sentrin-specific protease 7 OS=Homo sapiens (Human) OX=9606 GN=SENP7 PE=1 SV=4	SENP7	0.001	127.332	30	25	43	25	1050	119.6
High	Q6N069	N-alpha-acetyltransferase 16, NatA auxiliary subunit OS=Homo sapiens (Human) OX=9606 GN=NAA16 PE=1 SV=2	NAA16	0.001	123.397	34	25	55	25	864	101.4
High	O94880	PHD finger protein 14 OS=Homo sapiens (Human) OX=9606 GN=PHF14 PE=1 SV=2	PHF14	0.001	123.246	35	25	57	25	888	100
High	Q9NRA8	Eukaryotic translation initiation factor 4E transporter OS=Homo sapiens (Human) OX=9606 GN=EIF4ENIF1 PE=1 SV=2	EIF4ENIF1	0.001	120.588	36	25	44	25	985	108.1
High	Q8WVS4	Cytoplasmic dynein 2 intermediate chain 1 OS=Homo sapiens (Human) OX=9606 GN=DYNC2I1 PE=1 SV=3	DYNC2I1	0.001	120.139	33	25	51	25	1066	122.5
High	Q8N3T6	Transmembrane protein 132C OS=Homo sapiens (Human) OX=9606 GN=TMEM132C PE=2 SV=3	TMEM132C	0.001	117.787	29	25	51	25	1108	121.7
High	O75448	Mediator of RNA polymerase II transcription subunit 24 OS=Homo sapiens (Human) OX=9606 GN=MED24 PE=1 SV=1	MED24	0.001	117.371	31	25	46	25	989	110.2
High	O60826	Coiled-coil domain-containing protein 22 OS=Homo sapiens (Human) OX=9606 GN=CCDC22 PE=1 SV=1	CCDC22	0.001	116.681	43	25	47	25	627	70.7
High	Q8IZ69	tRNA (uracil-5-)-methyltransferase homolog A OS=Homo sapiens (Human) OX=9606 GN=TRMT2A PE=1 SV=2	TRMT2A	0.001	115.841	44	25	48	25	625	68.7
High	Q96EV2	RNA-binding protein 33 OS=Homo sapiens (Human) OX=9606 GN=RBM33 PE=1 SV=3	RBM33	0.001	115.572	32	25	59	25	1170	129.9
High	P0CAP2	DNA-directed RNA polymerase II subunit GRINL1A OS=Homo sapiens (Human) OX=9606 GN=POLR2M PE=1 SV=1	POLR2M	0.001	114.016	72	25	38	25	368	41.7
High	Q86TI0	TBC1 domain family member 1 OS=Homo sapiens (Human) OX=9606 GN=TBC1D1 PE=1 SV=2	TBC1D1	0.001	113.186	23	25	46	25	1168	133
High	P19838	Nuclear factor NF-kappa-B p105 subunit OS=Homo sapiens (Human) OX=9606 GN=NFKB1 PE=1 SV=2	NFKB1	0.001	112.808	28	25	39	25	968	105.3
High	Q8N3F8	MICAL-like protein 1 OS=Homo sapiens (Human) OX=9606 GN=MICALL1 PE=1 SV=2	MICALL1	0.001	111.895	42	25	46	25	863	93.4
High	P51957	Serine/threonine-protein kinase Nek4 OS=Homo sapiens (Human) OX=9606 GN=NEK4 PE=1 SV=2	NEK4	0.001	111.391	34	25	49	25	841	94.5
High	Q8NB49	Phospholipid-transporting ATPase IG OS=Homo sapiens (Human) OX=9606 GN=ATP11C PE=1 SV=3	ATP11C	0.001	111.115	24	25	40	25	1132	129.4
High	Q96PX9	Pleckstrin homology domain-containing family G member 4B OS=Homo sapiens (Human) OX=9606 GN=PLEKHG4B PE=1 SV=4	PLEKHG4B	0.001	110.928	26	25	37	25	1271	139.6
High	Q15283	Ras GTPase-activating protein 2 OS=Homo sapiens (Human) OX=9606 GN=RASA2 PE=1 SV=3	RASA2	0.001	110.751	37	25	39	25	850	96.6
High	Q6P4R8	Nuclear factor related to kappa-B-binding protein OS=Homo sapiens (Human) OX=9606 GN=NFRKB PE=1 SV=2	NFRKB	0.001	110.72	27	25	49	25	1299	138.9
High	Q86VP1	Tax1-binding protein 1 OS=Homo sapiens (Human) OX=9606 GN=TAX1BP1 PE=1 SV=2	TAX1BP1	0.001	110.634	34	25	43	25	789	90.8
High	Q5T160	Probable arginine--tRNA ligase, mitochondrial OS=Homo sapiens (Human) OX=9606 GN=RARS2 PE=1 SV=1	RARS2	0.001	107.922	43	25	50	25	578	65.5
High	Q9P2K1	Coiled-coil and C2 domain-containing protein 2A OS=Homo sapiens (Human) OX=9606 GN=CC2D2A PE=1 SV=3	CC2D2A	0.001	105.912	17	25	49	25	1620	186.1
High	Q86YT6	E3 ubiquitin-protein ligase MIB1 OS=Homo sapiens (Human) OX=9606 GN=MIB1 PE=1 SV=1	MIB1	0.001	105.342	31	25	42	25	1006	110.1
High	Q9H078	Caseinolytic peptidase B protein homolog OS=Homo sapiens (Human) OX=9606 GN=CLPB PE=1 SV=1	CLPB	0.001	103.326	45	25	55	25	707	78.7
High	P49746	Thrombospondin-3 OS=Homo sapiens (Human) OX=9606 GN=THBS3 PE=1 SV=1	THBS3	0.001	102.928	39	25	50	25	956	104.1
High	Q8IY21	Probable ATP-dependent RNA helicase DDX60 OS=Homo sapiens (Human) OX=9606 GN=DDX60 PE=1 SV=3	DDX60	0.001	102.263	15	25	68	25	1712	197.7
High	Q9P2D0	Inhibitor of Bruton tyrosine kinase OS=Homo sapiens (Human) OX=9606 GN=IBTK PE=1 SV=3	IBTK	0.001	101.332	21	25	38	25	1353	150.4
High	Q9H1H9	Kinesin-like protein KIF13A OS=Homo sapiens (Human) OX=9606 GN=KIF13A PE=1 SV=2	KIF13A	0.001	99.677	19	25	39	25	1805	202.2
High	P48200	Iron-responsive element-binding protein 2 OS=Homo sapiens (Human) OX=9606 GN=IREB2 PE=1 SV=4	IREB2	0.001	99.254	37	25	40	25	963	105
High	Q8IXW5	Putative RNA polymerase II subunit B1 CTD phosphatase RPAP2 OS=Homo sapiens (Human) OX=9606 GN=RPAP2 PE=1 SV=1	RPAP2	0.001	97.252	52	25	39	25	612	69.5
High	Q96RU3	Formin-binding protein 1 OS=Homo sapiens (Human) OX=9606 GN=FNBP1 PE=1 SV=2	FNBP1	0.001	96.885	40	25	50	25	617	71.3
High	Q9UPS6	Histone-lysine N-methyltransferase SETD1B OS=Homo sapiens (Human) OX=9606 GN=SETD1B PE=1 SV=3	SETD1B	0.001	93.685	20	25	38	25	1966	212.7
High	Q9NZJ0	Denticleless protein homolog OS=Homo sapiens (Human) OX=9606 GN=DTL PE=1 SV=3	DTL	0.001	93.631	42	25	40	25	730	79.4
High	P98196	Probable phospholipid-transporting ATPase IH OS=Homo sapiens (Human) OX=9606 GN=ATP11A PE=1 SV=3	ATP11A	0.001	92.644	28	25	50	25	1134	129.7
High	Q6ZV73	FYVE, RhoGEF and PH domain-containing protein 6 OS=Homo sapiens (Human) OX=9606 GN=FGD6 PE=1 SV=2	FGD6	0.001	90.348	20	25	38	25	1430	160.7
High	Q8IXZ2	Zinc finger CCCH domain-containing protein 3 OS=Homo sapiens (Human) OX=9606 GN=ZC3H3 PE=1 SV=3	ZC3H3	0.001	86.792	34	25	44	25	948	101.9
High	Q8WXG6	MAP kinase-activating death domain protein OS=Homo sapiens (Human) OX=9606 GN=MADD PE=1 SV=2	MADD	0.001	82.736	20	25	45	25	1647	183.2
High	Q68CZ1	Protein fantom OS=Homo sapiens (Human) OX=9606 GN=RPGRIP1L PE=1 SV=2	RPGRIP1L	0.001	79.787	21	25	29	25	1315	151.1
High	P28749	Retinoblastoma-like protein 1 OS=Homo sapiens (Human) OX=9606 GN=RBL1 PE=1 SV=3	RBL1	0.001	77.77	22	25	30	25	1068	120.8
High	Q14031	Collagen alpha-6(IV) chain OS=Homo sapiens (Human) OX=9606 GN=COL4A6 PE=1 SV=3	COL4A6	0.001	75.473	27	25	34	25	1691	163.7
High	Q9Y6X8	Zinc fingers and homeoboxes protein 2 OS=Homo sapiens (Human) OX=9606 GN=ZHX2 PE=1 SV=1	ZHX2	0.001	74.874	37	25	36	25	837	92.3
High	A2VDJ0	Transmembrane protein 131-like OS=Homo sapiens (Human) OX=9606 GN=TMEM131L PE=1 SV=2	TMEM131L	0.001	74.665	16	25	37	25	1609	179.2
High	Q8WXD9	Caskin-1 OS=Homo sapiens (Human) OX=9606 GN=CASKIN1 PE=1 SV=1	CASKIN1	0.001	72.82	29	25	41	25	1431	149.7
High	Q9Y2H5	Pleckstrin homology domain-containing family A member 6 OS=Homo sapiens (Human) OX=9606 GN=PLEKHA6 PE=1 SV=4	PLEKHA6	0	69.413	24	25	30	25	1048	117.1
High	Q9HCJ6	Synaptic vesicle membrane protein VAT-1 homolog-like OS=Homo sapiens (Human) OX=9606 GN=VAT1L PE=1 SV=2	VAT1L	0.003	350.188	61	24	218	24	419	45.9
High	Q9NPH2	Inositol-3-phosphate synthase 1 OS=Homo sapiens (Human) OX=9606 GN=ISYNA1 PE=1 SV=1	ISYNA1	0.002	284.088	57	24	210	24	558	61
High	Q96KP4	Cytosolic non-specific dipeptidase OS=Homo sapiens (Human) OX=9606 GN=CNDP2 PE=1 SV=2	CNDP2	0.002	275.359	61	24	196	24	475	52.8
High	P12277	Creatine kinase B-type OS=Homo sapiens (Human) OX=9606 GN=CKB PE=1 SV=1	CKB	0.001	256.595	76	24	272	24	381	42.6
High	P18124	60S ribosomal protein L7 OS=Homo sapiens (Human) OX=9606 GN=RPL7 PE=1 SV=1	RPL7	0.001	245.094	63	24	322	24	248	29.2
High	P0DN79	Cystathionine beta-synthase-like protein OS=Homo sapiens (Human) OX=9606 GN=CBSL PE=1 SV=1	CBSL	0.001	227.533	59	24	150	24	551	60.5
High	Q04323	UBX domain-containing protein 1 OS=Homo sapiens (Human) OX=9606 GN=UBXN1 PE=1 SV=2	UBXN1	0.001	226.368	73	24	121	24	297	33.3
High	P21281	V-type proton ATPase subunit B, brain isoform OS=Homo sapiens (Human) OX=9606 GN=ATP6V1B2 PE=1 SV=3	ATP6V1B2	0.001	225.238	55	24	120	24	511	56.5
High	Q32P28	Prolyl 3-hydroxylase 1 OS=Homo sapiens (Human) OX=9606 GN=P3H1 PE=1 SV=2	P3H1	0.001	220.731	41	24	102	24	736	83.3
High	P30520	Adenylosuccinate synthetase isozyme 2 OS=Homo sapiens (Human) OX=9606 GN=ADSS2 PE=1 SV=3	ADSS2	0.001	214.864	51	24	183	24	456	50.1
High	Q9Y3F4	Serine-threonine kinase receptor-associated protein OS=Homo sapiens (Human) OX=9606 GN=STRAP PE=1 SV=1	STRAP	0.001	213.98	76	24	122	24	350	38.4
High	P23193	Transcription elongation factor A protein 1 OS=Homo sapiens (Human) OX=9606 GN=TCEA1 PE=1 SV=2	TCEA1	0.001	212.117	68	24	147	24	301	33.9
High	P49189	4-trimethylaminobutyraldehyde dehydrogenase OS=Homo sapiens (Human) OX=9606 GN=ALDH9A1 PE=1 SV=3	ALDH9A1	0.001	200.127	63	24	105	24	494	53.8
High	P62495	Eukaryotic peptide chain release factor subunit 1 OS=Homo sapiens (Human) OX=9606 GN=ETF1 PE=1 SV=3	ETF1	0.001	197.307	62	24	117	24	437	49
High	P41091	Eukaryotic translation initiation factor 2 subunit 3 OS=Homo sapiens (Human) OX=9606 GN=EIF2S3 PE=1 SV=3	EIF2S3	0.001	191.369	58	24	149	24	472	51.1
High	Q9Y2Z0	Protein SGT1 homolog OS=Homo sapiens (Human) OX=9606 GN=SUGT1 PE=1 SV=3	SUGT1	0.001	190.238	64	24	89	24	365	41
High	Q53EL6	Programmed cell death protein 4 OS=Homo sapiens (Human) OX=9606 GN=PDCD4 PE=1 SV=2	PDCD4	0.001	188.113	60	24	93	24	469	51.7
High	P08559	Pyruvate dehydrogenase E1 component subunit alpha, somatic form, mitochondrial OS=Homo sapiens (Human) OX=9606 GN=PDHA1 PE=1 SV=3	PDHA1	0.001	183.877	55	24	110	24	390	43.3
High	Q06203	Amidophosphoribosyltransferase OS=Homo sapiens (Human) OX=9606 GN=PPAT PE=1 SV=1	PPAT	0.001	182.547	45	24	110	24	517	57.4
High	Q05516	Zinc finger and BTB domain-containing protein 16 OS=Homo sapiens (Human) OX=9606 GN=ZBTB16 PE=1 SV=2	ZBTB16	0.001	182.455	55	24	66	24	673	74.2
High	P67936	Tropomyosin alpha-4 chain OS=Homo sapiens (Human) OX=9606 GN=TPM4 PE=1 SV=3	TPM4	0.001	182.428	63	24	340	24	248	28.5
High	Q6NUK1	Calcium-binding mitochondrial carrier protein SCaMC-1 OS=Homo sapiens (Human) OX=9606 GN=SLC25A24 PE=1 SV=2	SLC25A24	0.001	182.246	55	24	126	24	477	53.3
High	P55084	Trifunctional enzyme subunit beta, mitochondrial OS=Homo sapiens (Human) OX=9606 GN=HADHB PE=1 SV=3	HADHB	0.001	177.366	48	24	99	24	474	51.3
High	Q8WYA6	Beta-catenin-like protein 1 OS=Homo sapiens (Human) OX=9606 GN=CTNNBL1 PE=1 SV=1	CTNNBL1	0.001	174.711	36	24	102	24	563	65.1
High	P52630	Signal transducer and activator of transcription 2 OS=Homo sapiens (Human) OX=9606 GN=STAT2 PE=1 SV=1	STAT2	0.001	173.209	31	24	61	24	851	97.9
High	Q10713	Mitochondrial-processing peptidase subunit alpha OS=Homo sapiens (Human) OX=9606 GN=PMPCA PE=1 SV=2	PMPCA	0.001	170.983	55	24	80	24	525	58.2
High	Q9UJA5	tRNA (adenine(58)-N(1))-methyltransferase non-catalytic subunit TRM6 OS=Homo sapiens (Human) OX=9606 GN=TRMT6 PE=1 SV=1	TRMT6	0.001	165.555	59	24	68	24	497	55.8
High	O95487	Protein transport protein Sec24B OS=Homo sapiens (Human) OX=9606 GN=SEC24B PE=1 SV=2	SEC24B	0.001	164.435	24	24	82	24	1268	137.3
High	Q6IA86	Elongator complex protein 2 OS=Homo sapiens (Human) OX=9606 GN=ELP2 PE=1 SV=2	ELP2	0.001	161.281	37	24	79	24	826	92.4
High	Q6AI08	HEAT repeat-containing protein 6 OS=Homo sapiens (Human) OX=9606 GN=HEATR6 PE=1 SV=1	HEATR6	0.001	160.599	25	24	53	24	1181	128.7
High	Q10471	Polypeptide N-acetylgalactosaminyltransferase 2 OS=Homo sapiens (Human) OX=9606 GN=GALNT2 PE=1 SV=1	GALNT2	0.001	159.171	47	24	71	24	571	64.7
High	Q9H8H0	Nucleolar protein 11 OS=Homo sapiens (Human) OX=9606 GN=NOL11 PE=1 SV=1	NOL11	0.001	158.98	45	24	89	24	719	81.1
High	Q15059	Bromodomain-containing protein 3 OS=Homo sapiens (Human) OX=9606 GN=BRD3 PE=1 SV=1	BRD3	0.001	157.748	38	24	99	24	726	79.5
High	Q9BXS6	Nucleolar and spindle-associated protein 1 OS=Homo sapiens (Human) OX=9606 GN=NUSAP1 PE=1 SV=1	NUSAP1	0.001	157.515	60	24	67	24	441	49.4
High	P12955	Xaa-Pro dipeptidase OS=Homo sapiens (Human) OX=9606 GN=PEPD PE=1 SV=3	PEPD	0.001	157.248	53	24	83	24	493	54.5
High	Q16881	Thioredoxin reductase 1, cytoplasmic OS=Homo sapiens (Human) OX=9606 GN=TXNRD1 PE=1 SV=3	TXNRD1	0.001	156.791	44	24	87	24	649	70.9
High	Q9NUQ7	Ufm1-specific protease 2 OS=Homo sapiens (Human) OX=9606 GN=UFSP2 PE=1 SV=3	UFSP2	0.001	155.905	61	24	79	24	469	53.2
High	Q14157	Ubiquitin-associated protein 2-like OS=Homo sapiens (Human) OX=9606 GN=UBAP2L PE=1 SV=2	UBAP2L	0.001	153.401	35	24	61	24	1087	114.5
High	O00186	Syntaxin-binding protein 3 OS=Homo sapiens (Human) OX=9606 GN=STXBP3 PE=1 SV=2	STXBP3	0.001	152.983	39	24	61	24	592	67.7
High	Q15833	Syntaxin-binding protein 2 OS=Homo sapiens (Human) OX=9606 GN=STXBP2 PE=1 SV=2	STXBP2	0.001	152.354	45	24	46	24	593	66.4
High	P18031	Tyrosine-protein phosphatase non-receptor type 1 OS=Homo sapiens (Human) OX=9606 GN=PTPN1 PE=1 SV=1	PTPN1	0.001	151.401	55	24	67	24	435	49.9
High	O00461	Golgi integral membrane protein 4 OS=Homo sapiens (Human) OX=9606 GN=GOLIM4 PE=1 SV=1	GOLIM4	0.001	150.398	40	24	52	24	696	81.8
High	Q6NZY4	Zinc finger CCHC domain-containing protein 8 OS=Homo sapiens (Human) OX=9606 GN=ZCCHC8 PE=1 SV=2	ZCCHC8	0.001	149.788	47	24	57	24	707	78.5
High	Q6L8Q7	2',5'-phosphodiesterase 12 OS=Homo sapiens (Human) OX=9606 GN=PDE12 PE=1 SV=2	PDE12	0.001	149.61	57	24	71	24	609	67.3
High	Q9UBP0	Spastin OS=Homo sapiens (Human) OX=9606 GN=SPAST PE=1 SV=1	SPAST	0.001	148.949	50	24	53	24	616	67.2
High	Q9NZC9	SWI/SNF-related matrix-associated actin-dependent regulator of chromatin subfamily A-like protein 1 OS=Homo sapiens (Human) OX=9606 GN=SMARCAL1 PE=1 SV=1	SMARCAL1	0.001	148.45	36	24	65	24	954	105.9
High	Q9H267	Vacuolar protein sorting-associated protein 33B OS=Homo sapiens (Human) OX=9606 GN=VPS33B PE=1 SV=2	VPS33B	0.001	147.684	39	24	64	24	617	70.5
High	P42696	RNA-binding protein 34 OS=Homo sapiens (Human) OX=9606 GN=RBM34 PE=1 SV=2	RBM34	0.001	146.496	42	24	58	24	430	48.5
High	P46977	Dolichyl-diphosphooligosaccharide--protein glycosyltransferase subunit STT3A OS=Homo sapiens (Human) OX=9606 GN=STT3A PE=1 SV=2	STT3A	0.001	144.18	29	24	102	24	705	80.5
High	Q8TED0	U3 small nucleolar RNA-associated protein 15 homolog OS=Homo sapiens (Human) OX=9606 GN=UTP15 PE=1 SV=3	UTP15	0.001	143.056	53	24	69	24	518	58.4
High	Q9UPP1	Histone lysine demethylase PHF8 OS=Homo sapiens (Human) OX=9606 GN=PHF8 PE=1 SV=3	PHF8	0.001	142.346	27	24	57	24	1060	117.8
High	Q7L2J0	7SK snRNA methylphosphate capping enzyme OS=Homo sapiens (Human) OX=9606 GN=MEPCE PE=1 SV=1	MEPCE	0.001	140.385	48	24	64	24	689	74.3
High	Q9NPI1	Bromodomain-containing protein 7 OS=Homo sapiens (Human) OX=9606 GN=BRD7 PE=1 SV=1	BRD7	0.001	139.551	57	24	56	24	651	74.1
High	Q13042	Cell division cycle protein 16 homolog OS=Homo sapiens (Human) OX=9606 GN=CDC16 PE=1 SV=2	CDC16	0.001	139.529	38	24	60	24	620	71.6
High	Q8WVC0	RNA polymerase-associated protein LEO1 OS=Homo sapiens (Human) OX=9606 GN=LEO1 PE=1 SV=1	LEO1	0.001	138.477	59	24	73	24	666	75.4
High	O00754	Lysosomal alpha-mannosidase OS=Homo sapiens (Human) OX=9606 GN=MAN2B1 PE=1 SV=3	MAN2B1	0.001	137.971	28	24	51	24	1011	113.7
High	Q4KMP7	TBC1 domain family member 10B OS=Homo sapiens (Human) OX=9606 GN=TBC1D10B PE=1 SV=3	TBC1D10B	0.001	137.854	54	24	53	24	808	87.1
High	Q9NV88	Integrator complex subunit 9 OS=Homo sapiens (Human) OX=9606 GN=INTS9 PE=1 SV=2	INTS9	0.001	137.56	41	24	63	24	658	73.8
High	Q9H6U6	Breast carcinoma-amplified sequence 3 OS=Homo sapiens (Human) OX=9606 GN=BCAS3 PE=1 SV=3	BCAS3	0.001	136.858	35	24	48	24	928	101.2
High	Q15345	Leucine-rich repeat-containing protein 41 OS=Homo sapiens (Human) OX=9606 GN=LRRC41 PE=1 SV=3	LRRC41	0.001	136.856	28	24	45	24	812	88.6
High	Q13614	Myotubularin-related protein 2 OS=Homo sapiens (Human) OX=9606 GN=MTMR2 PE=1 SV=4	MTMR2	0.001	136.275	49	24	47	24	643	73.3
High	Q96EP0	E3 ubiquitin-protein ligase RNF31 OS=Homo sapiens (Human) OX=9606 GN=RNF31 PE=1 SV=1	RNF31	0.001	134.531	33	24	45	24	1072	119.6
High	Q8ND56	Protein LSM14 homolog A OS=Homo sapiens (Human) OX=9606 GN=LSM14A PE=1 SV=3	LSM14A	0.001	133.021	45	24	69	24	463	50.5
High	Q9Y3T9	Nucleolar complex protein 2 homolog OS=Homo sapiens (Human) OX=9606 GN=NOC2L PE=1 SV=4	NOC2L	0.001	132.005	28	24	75	24	749	84.9
High	Q96SB3	Neurabin-2 OS=Homo sapiens (Human) OX=9606 GN=PPP1R9B PE=1 SV=3	PPP1R9B	0.001	131.574	35	24	51	24	817	89.3
High	Q9NRW7	Vacuolar protein sorting-associated protein 45 OS=Homo sapiens (Human) OX=9606 GN=VPS45 PE=1 SV=1	VPS45	0.001	131.297	48	24	73	24	570	65
High	Q8IWU6	Extracellular sulfatase Sulf-1 OS=Homo sapiens (Human) OX=9606 GN=SULF1 PE=1 SV=1	SULF1	0.001	130.867	30	24	64	24	871	101
High	Q6P1X5	Transcription initiation factor TFIID subunit 2 OS=Homo sapiens (Human) OX=9606 GN=TAF2 PE=1 SV=3	TAF2	0.001	126.928	23	24	49	24	1199	136.9
High	Q9UI10	Translation initiation factor eIF-2B subunit delta OS=Homo sapiens (Human) OX=9606 GN=EIF2B4 PE=1 SV=2	EIF2B4	0.001	125.578	56	24	55	24	523	57.5
High	Q9NVU0	DNA-directed RNA polymerase III subunit RPC5 OS=Homo sapiens (Human) OX=9606 GN=POLR3E PE=1 SV=1	POLR3E	0.001	125.195	44	24	53	24	708	79.8
High	O94782	Ubiquitin carboxyl-terminal hydrolase 1 OS=Homo sapiens (Human) OX=9606 GN=USP1 PE=1 SV=1	USP1	0.001	125.005	35	24	45	24	785	88.2
High	Q96G46	tRNA-dihydrouridine(47) synthase [NAD(P)(+)]-like OS=Homo sapiens (Human) OX=9606 GN=DUS3L PE=1 SV=2	DUS3L	0.001	123.129	49	24	58	24	650	72.5
High	Q9UJX4	Anaphase-promoting complex subunit 5 OS=Homo sapiens (Human) OX=9606 GN=ANAPC5 PE=1 SV=2	ANAPC5	0.001	122.812	35	24	47	24	755	85
High	Q8NFW8	N-acylneuraminate cytidylyltransferase OS=Homo sapiens (Human) OX=9606 GN=CMAS PE=1 SV=2	CMAS	0.001	122.304	54	24	63	24	434	48.3
High	Q13201	Multimerin-1 OS=Homo sapiens (Human) OX=9606 GN=MMRN1 PE=1 SV=3	MMRN1	0.001	122.189	23	24	43	24	1228	138
High	Q9H7E2	Tudor domain-containing protein 3 OS=Homo sapiens (Human) OX=9606 GN=TDRD3 PE=1 SV=1	TDRD3	0.001	122.176	44	24	49	24	651	73.1
High	O15234	Protein CASC3 OS=Homo sapiens (Human) OX=9606 GN=CASC3 PE=1 SV=2	CASC3	0.001	121.754	49	24	50	24	703	76.2
High	Q9H6E5	Speckle targeted PIP5K1A-regulated poly(A) polymerase OS=Homo sapiens (Human) OX=9606 GN=TUT1 PE=1 SV=2	TUT1	0.001	120.403	33	24	45	24	874	93.8
High	Q9H4Z3	mRNA (2'-O-methyladenosine-N(6)-)-methyltransferase OS=Homo sapiens (Human) OX=9606 GN=PCIF1 PE=1 SV=1	PCIF1	0.001	118.489	47	24	47	24	704	80.6
High	Q9UNE7	E3 ubiquitin-protein ligase CHIP OS=Homo sapiens (Human) OX=9606 GN=STUB1 PE=1 SV=2	STUB1	0.001	116.606	63	24	61	24	303	34.8
High	Q2M2I8	AP2-associated protein kinase 1 OS=Homo sapiens (Human) OX=9606 GN=AAK1 PE=1 SV=3	AAK1	0.001	114.716	39	24	42	24	961	103.8
High	Q6JQN1	Acyl-CoA dehydrogenase family member 10 OS=Homo sapiens (Human) OX=9606 GN=ACAD10 PE=1 SV=1	ACAD10	0.001	114.194	25	24	47	24	1059	118.8
High	Q86VS8	Protein Hook homolog 3 OS=Homo sapiens (Human) OX=9606 GN=HOOK3 PE=1 SV=2	HOOK3	0.001	113.534	30	24	45	24	718	83.1
High	Q9P2N6	KAT8 regulatory NSL complex subunit 3 OS=Homo sapiens (Human) OX=9606 GN=KANSL3 PE=1 SV=2	KANSL3	0.001	112.512	37	24	41	24	904	95.9
High	Q9HBF4	Zinc finger FYVE domain-containing protein 1 OS=Homo sapiens (Human) OX=9606 GN=ZFYVE1 PE=1 SV=1	ZFYVE1	0.001	112.32	37	24	40	24	777	87.1
High	O75151	Lysine-specific demethylase PHF2 OS=Homo sapiens (Human) OX=9606 GN=PHF2 PE=1 SV=4	PHF2	0.001	111.418	28	24	37	24	1096	120.7
High	Q6NUQ4	Transmembrane protein 214 OS=Homo sapiens (Human) OX=9606 GN=TMEM214 PE=1 SV=2	TMEM214	0.001	111.231	37	24	52	24	689	77.1
High	Q7Z6L1	Tectonin beta-propeller repeat-containing protein 1 OS=Homo sapiens (Human) OX=9606 GN=TECPR1 PE=1 SV=1	TECPR1	0.001	110.637	35	24	37	24	1165	129.6
High	Q96JN8	Neuralized-like protein 4 OS=Homo sapiens (Human) OX=9606 GN=NEURL4 PE=1 SV=2	NEURL4	0.001	109.258	21	24	37	24	1562	166.8
High	O75155	Cullin-associated NEDD8-dissociated protein 2 OS=Homo sapiens (Human) OX=9606 GN=CAND2 PE=1 SV=3	CAND2	0.001	108.82	30	24	43	24	1236	135.2
High	Q13029	PR domain zinc finger protein 2 OS=Homo sapiens (Human) OX=9606 GN=PRDM2 PE=1 SV=3	PRDM2	0.001	108.521	19	24	46	24	1718	188.8
High	O43933	Peroxisome biogenesis factor 1 OS=Homo sapiens (Human) OX=9606 GN=PEX1 PE=1 SV=1	PEX1	0.001	106.597	20	24	51	24	1283	142.8
High	Q9UL12	Sarcosine dehydrogenase, mitochondrial OS=Homo sapiens (Human) OX=9606 GN=SARDH PE=1 SV=1	SARDH	0.001	105.787	37	24	37	24	918	101
High	Q12965	Unconventional myosin-Ie OS=Homo sapiens (Human) OX=9606 GN=MYO1E PE=1 SV=2	MYO1E	0.001	104.432	27	24	43	24	1108	127
High	Q9Y5K6	CD2-associated protein OS=Homo sapiens (Human) OX=9606 GN=CD2AP PE=1 SV=1	CD2AP	0.001	102.476	47	24	39	24	639	71.4
High	Q12840	Kinesin heavy chain isoform 5A OS=Homo sapiens (Human) OX=9606 GN=KIF5A PE=1 SV=2	KIF5A	0.001	102.392	28	24	36	24	1032	117.3
High	Q9BQS7	Hephaestin OS=Homo sapiens (Human) OX=9606 GN=HEPH PE=1 SV=3	HEPH	0.001	101.306	27	24	43	24	1158	130.4
High	Q7Z3E5	LisH domain-containing protein ARMC9 OS=Homo sapiens (Human) OX=9606 GN=ARMC9 PE=1 SV=3	ARMC9	0.001	100.488	36	24	43	24	818	91.8
High	Q562F6	Shugoshin 2 OS=Homo sapiens (Human) OX=9606 GN=SGO2 PE=1 SV=2	SGO2	0.001	100.444	25	24	37	24	1265	144.7
High	O15270	Serine palmitoyltransferase 2 OS=Homo sapiens (Human) OX=9606 GN=SPTLC2 PE=1 SV=1	SPTLC2	0.001	100.392	42	24	42	24	562	62.9
High	Q9Y608	Leucine-rich repeat flightless-interacting protein 2 OS=Homo sapiens (Human) OX=9606 GN=LRRFIP2 PE=1 SV=1	LRRFIP2	0.001	99.631	34	24	36	24	721	82.1
High	Q9H8E8	Cysteine-rich protein 2-binding protein OS=Homo sapiens (Human) OX=9606 GN=KAT14 PE=1 SV=3	KAT14	0.001	96.263	45	24	59	24	782	88.8
High	Q68CQ4	Digestive organ expansion factor homolog OS=Homo sapiens (Human) OX=9606 GN=DIEXF PE=1 SV=2	DIEXF	0.001	95.416	34	24	50	24	756	87
High	Q8IVT5	Kinase suppressor of Ras 1 OS=Homo sapiens (Human) OX=9606 GN=KSR1 PE=1 SV=3	KSR1	0.001	93.43	30	24	53	24	923	102.1
High	O43379	WD repeat-containing protein 62 OS=Homo sapiens (Human) OX=9606 GN=WDR62 PE=1 SV=4	WDR62	0.001	93.394	27	24	35	24	1518	165.8
High	Q9HCE0	Ectopic P granules protein 5 homolog OS=Homo sapiens (Human) OX=9606 GN=EPG5 PE=1 SV=2	EPG5	0.001	92.079	12	24	33	24	2579	292.3
High	P55199	RNA polymerase II elongation factor ELL OS=Homo sapiens (Human) OX=9606 GN=ELL PE=1 SV=1	ELL	0.001	91.838	38	24	36	24	621	68.2
High	O75110	Probable phospholipid-transporting ATPase IIA OS=Homo sapiens (Human) OX=9606 GN=ATP9A PE=1 SV=3	ATP9A	0.001	91.327	23	24	36	24	1047	118.5
High	Q8NHU6	Tudor domain-containing protein 7 OS=Homo sapiens (Human) OX=9606 GN=TDRD7 PE=1 SV=2	TDRD7	0.001	91.161	24	24	33	24	1098	123.5
High	Q96RT7	Gamma-tubulin complex component 6 OS=Homo sapiens (Human) OX=9606 GN=TUBGCP6 PE=1 SV=3	TUBGCP6	0.001	89.587	15	24	45	24	1819	200.4
High	O75132	Zinc finger BED domain-containing protein 4 OS=Homo sapiens (Human) OX=9606 GN=ZBED4 PE=1 SV=2	ZBED4	0.001	88.307	23	24	40	24	1171	130.2
High	Q96BY6	Dedicator of cytokinesis protein 10 OS=Homo sapiens (Human) OX=9606 GN=DOCK10 PE=1 SV=3	DOCK10	0.001	88.086	17	24	46	24	2186	249.4
High	Q8WYB5	Histone acetyltransferase KAT6B OS=Homo sapiens (Human) OX=9606 GN=KAT6B PE=1 SV=3	KAT6B	0.001	86.035	15	24	38	24	2073	231.2
High	Q86Y13	E3 ubiquitin-protein ligase DZIP3 OS=Homo sapiens (Human) OX=9606 GN=DZIP3 PE=1 SV=2	DZIP3	0.001	85.091	25	24	33	24	1208	138.5
High	Q9Y3R0	Glutamate receptor-interacting protein 1 OS=Homo sapiens (Human) OX=9606 GN=GRIP1 PE=1 SV=3	GRIP1	0.001	83.849	27	24	45	24	1128	122.3
High	Q9UPZ6	Thrombospondin type-1 domain-containing protein 7A OS=Homo sapiens (Human) OX=9606 GN=THSD7A PE=1 SV=4	THSD7A	0.001	83.479	25	24	37	24	1657	185.2
High	Q04656	Copper-transporting ATPase 1 OS=Homo sapiens (Human) OX=9606 GN=ATP7A PE=1 SV=4	ATP7A	0.001	83.421	20	24	40	24	1500	163.3
High	P08572	Collagen alpha-2(IV) chain OS=Homo sapiens (Human) OX=9606 GN=COL4A2 PE=1 SV=4	COL4A2	0.001	81.462	22	24	40	24	1712	167.4
High	P01024	Complement C3 OS=Homo sapiens (Human) OX=9606 GN=C3 PE=1 SV=2	C3	0.001	79.363	16	24	36	24	1663	187
High	Q9Y2K6	Ubiquitin carboxyl-terminal hydrolase 20 OS=Homo sapiens (Human) OX=9606 GN=USP20 PE=1 SV=2	USP20	0.001	77.639	35	24	35	24	914	101.9
High	Q96PV0	Ras/Rap GTPase-activating protein SynGAP OS=Homo sapiens (Human) OX=9606 GN=SYNGAP1 PE=1 SV=4	SYNGAP1	0.001	77.181	21	24	50	24	1343	148.2
High	Q8N1G1	RNA exonuclease 1 homolog OS=Homo sapiens (Human) OX=9606 GN=REXO1 PE=1 SV=3	REXO1	0.001	76.06	28	24	37	24	1221	131.4
High	Q5JU85	IQ motif and SEC7 domain-containing protein 2 OS=Homo sapiens (Human) OX=9606 GN=IQSEC2 PE=1 SV=2	IQSEC2	0.001	75.167	20	24	42	24	1488	162.7
High	Q92824	Proprotein convertase subtilisin/kexin type 5 OS=Homo sapiens (Human) OX=9606 GN=PCSK5 PE=1 SV=4	PCSK5	0.001	74.138	20	24	30	24	1860	206.8
High	Q96RY5	Protein cramped-like OS=Homo sapiens (Human) OX=9606 GN=CRAMP1 PE=1 SV=3	CRAMP1	0	69.623	19	24	34	24	1269	134.6
High	Q8IY92	Structure-specific endonuclease subunit SLX4 OS=Homo sapiens (Human) OX=9606 GN=SLX4 PE=1 SV=3	SLX4	0	66.529	17	24	34	24	1834	199.9
High	Q6N021	Methylcytosine dioxygenase TET2 OS=Homo sapiens (Human) OX=9606 GN=TET2 PE=1 SV=3	TET2	0	61.041	15	24	34	24	2002	223.7
High	P67809	Y-box-binding protein 1 OS=Homo sapiens (Human) OX=9606 GN=YBX1 PE=1 SV=3	YBX1	0.003	393.903	67	23	341	23	324	35.9
High	P31689	DnaJ homolog subfamily A member 1 OS=Homo sapiens (Human) OX=9606 GN=DNAJA1 PE=1 SV=2	DNAJA1	0.002	296.531	60	23	189	23	397	44.8
High	Q15435	Protein phosphatase 1 regulatory subunit 7 OS=Homo sapiens (Human) OX=9606 GN=PPP1R7 PE=1 SV=1	PPP1R7	0.002	279.721	66	23	109	23	360	41.5
High	P46777	60S ribosomal protein L5 OS=Homo sapiens (Human) OX=9606 GN=RPL5 PE=1 SV=3	RPL5	0.001	255.563	56	23	492	23	297	34.3
High	P15121	Aldo-keto reductase family 1 member B1 OS=Homo sapiens (Human) OX=9606 GN=AKR1B1 PE=1 SV=3	AKR1B1	0.001	248.903	79	23	288	23	316	35.8
High	P23528	Cofilin-1 OS=Homo sapiens (Human) OX=9606 GN=CFL1 PE=1 SV=3	CFL1	0.001	248.807	81	23	331	23	166	18.5
High	P63244	Receptor of activated protein C kinase 1 OS=Homo sapiens (Human) OX=9606 GN=RACK1 PE=1 SV=3	RACK1	0.001	243.865	83	23	241	23	317	35.1
High	P49257	Protein ERGIC-53 OS=Homo sapiens (Human) OX=9606 GN=LMAN1 PE=1 SV=2	LMAN1	0.001	235.893	48	23	138	23	510	57.5
High	P10253	Lysosomal alpha-glucosidase OS=Homo sapiens (Human) OX=9606 GN=GAA PE=1 SV=4	GAA	0.001	233.815	30	23	139	23	952	105.3
High	Q9UQ80	Proliferation-associated protein 2G4 OS=Homo sapiens (Human) OX=9606 GN=PA2G4 PE=1 SV=3	PA2G4	0.001	233.748	62	23	190	23	394	43.8
High	Q9UBE0	SUMO-activating enzyme subunit 1 OS=Homo sapiens (Human) OX=9606 GN=SAE1 PE=1 SV=1	SAE1	0.001	233.104	71	23	153	23	346	38.4
High	Q9UHD1	Cysteine and histidine-rich domain-containing protein 1 OS=Homo sapiens (Human) OX=9606 GN=CHORDC1 PE=1 SV=2	CHORDC1	0.001	224.966	66	23	152	23	332	37.5
High	P08621	U1 small nuclear ribonucleoprotein 70 kDa OS=Homo sapiens (Human) OX=9606 GN=SNRNP70 PE=1 SV=2	SNRNP70	0.001	223.223	48	23	278	23	437	51.5
High	P61158	Actin-related protein 3 OS=Homo sapiens (Human) OX=9606 GN=ACTR3 PE=1 SV=3	ACTR3	0.001	222.64	65	23	211	23	418	47.3
High	P43490	Nicotinamide phosphoribosyltransferase OS=Homo sapiens (Human) OX=9606 GN=NAMPT PE=1 SV=1	NAMPT	0.001	215.081	52	23	105	23	491	55.5
High	P09622	Dihydrolipoyl dehydrogenase, mitochondrial OS=Homo sapiens (Human) OX=9606 GN=DLD PE=1 SV=2	DLD	0.001	212.645	60	23	169	23	509	54.1
High	Q5BKZ1	DBIRD complex subunit ZNF326 OS=Homo sapiens (Human) OX=9606 GN=ZNF326 PE=1 SV=2	ZNF326	0.001	195.197	42	23	97	23	582	65.6
High	Q3LXA3	Triokinase/FMN cyclase OS=Homo sapiens (Human) OX=9606 GN=TKFC PE=1 SV=2	TKFC	0.001	188.226	51	23	70	23	575	58.9
High	Q96A33	Coiled-coil domain-containing protein 47 OS=Homo sapiens (Human) OX=9606 GN=CCDC47 PE=1 SV=1	CCDC47	0.001	182.755	50	23	98	23	483	55.8
High	Q96I24	Far upstream element-binding protein 3 OS=Homo sapiens (Human) OX=9606 GN=FUBP3 PE=1 SV=2	FUBP3	0.001	180.721	41	23	90	23	572	61.6
High	P51648	Aldehyde dehydrogenase family 3 member A2 OS=Homo sapiens (Human) OX=9606 GN=ALDH3A2 PE=1 SV=1	ALDH3A2	0.001	179.833	53	23	97	23	485	54.8
High	O60749	Sorting nexin-2 OS=Homo sapiens (Human) OX=9606 GN=SNX2 PE=1 SV=2	SNX2	0.001	179.342	52	23	135	23	519	58.4
High	P05166	Propionyl-CoA carboxylase beta chain, mitochondrial OS=Homo sapiens (Human) OX=9606 GN=PCCB PE=1 SV=3	PCCB	0.001	176.737	57	23	91	23	539	58.2
High	Q16204	Coiled-coil domain-containing protein 6 OS=Homo sapiens (Human) OX=9606 GN=CCDC6 PE=1 SV=2	CCDC6	0.001	175.234	54	23	84	23	474	53.3
High	P35269	General transcription factor IIF subunit 1 OS=Homo sapiens (Human) OX=9606 GN=GTF2F1 PE=1 SV=2	GTF2F1	0.001	173.096	49	23	79	23	517	58.2
High	P30533	Alpha-2-macroglobulin receptor-associated protein OS=Homo sapiens (Human) OX=9606 GN=LRPAP1 PE=1 SV=1	LRPAP1	0.001	172.939	58	23	89	23	357	41.4
High	Q9H857	5'-nucleotidase domain-containing protein 2 OS=Homo sapiens (Human) OX=9606 GN=NT5DC2 PE=1 SV=1	NT5DC2	0.001	171.905	51	23	91	23	520	60.7
High	O15372	Eukaryotic translation initiation factor 3 subunit H OS=Homo sapiens (Human) OX=9606 GN=EIF3H PE=1 SV=1	EIF3H	0.001	171.742	72	23	93	23	352	39.9
High	P40938	Replication factor C subunit 3 OS=Homo sapiens (Human) OX=9606 GN=RFC3 PE=1 SV=2	RFC3	0.001	168.687	69	23	78	23	356	40.5
High	Q96RS6	NudC domain-containing protein 1 OS=Homo sapiens (Human) OX=9606 GN=NUDCD1 PE=1 SV=2	NUDCD1	0.001	165.281	42	23	92	23	583	66.7
High	Q53GS9	U4/U6.U5 tri-snRNP-associated protein 2 OS=Homo sapiens (Human) OX=9606 GN=USP39 PE=1 SV=2	USP39	0.001	164.891	41	23	89	23	565	65.3
High	Q9UNZ2	NSFL1 cofactor p47 OS=Homo sapiens (Human) OX=9606 GN=NSFL1C PE=1 SV=2	NSFL1C	0.001	160.85	64	23	98	23	370	40.5
High	P08727	Keratin, type I cytoskeletal 19 OS=Homo sapiens (Human) OX=9606 GN=KRT19 PE=1 SV=4	KRT19	0.001	160.471	54	23	73	23	400	44.1
High	Q05193	Dynamin-1 OS=Homo sapiens (Human) OX=9606 GN=DNM1 PE=1 SV=2	DNM1	0.001	159.085	34	23	67	23	864	97.3
High	Q9NRL3	Striatin-4 OS=Homo sapiens (Human) OX=9606 GN=STRN4 PE=1 SV=2	STRN4	0.001	158.436	43	23	70	23	753	80.5
High	Q9Y315	Deoxyribose-phosphate aldolase OS=Homo sapiens (Human) OX=9606 GN=DERA PE=1 SV=2	DERA	0.001	157.897	77	23	83	23	318	35.2
High	Q07866	Kinesin light chain 1 OS=Homo sapiens (Human) OX=9606 GN=KLC1 PE=1 SV=2	KLC1	0.001	157.059	35	23	67	23	573	65.3
High	Q9BZL6	Serine/threonine-protein kinase D2 OS=Homo sapiens (Human) OX=9606 GN=PRKD2 PE=1 SV=3	PRKD2	0.001	153.883	38	23	55	23	878	96.7
High	Q13112	Chromatin assembly factor 1 subunit B OS=Homo sapiens (Human) OX=9606 GN=CHAF1B PE=1 SV=1	CHAF1B	0.001	153.505	44	23	73	23	559	61.5
High	Q8TAT6	Nuclear protein localization protein 4 homolog OS=Homo sapiens (Human) OX=9606 GN=NPLOC4 PE=1 SV=3	NPLOC4	0.001	151.449	52	23	87	23	608	68.1
High	Q96HC4	PDZ and LIM domain protein 5 OS=Homo sapiens (Human) OX=9606 GN=PDLIM5 PE=1 SV=5	PDLIM5	0.001	149.934	57	23	80	23	596	63.9
High	P04049	RAF proto-oncogene serine/threonine-protein kinase OS=Homo sapiens (Human) OX=9606 GN=RAF1 PE=1 SV=1	RAF1	0.001	147.078	40	23	61	23	648	73
High	Q9H900	Protein zwilch homolog OS=Homo sapiens (Human) OX=9606 GN=ZWILCH PE=1 SV=2	ZWILCH	0.001	145.451	45	23	65	23	591	67.2
High	Q96AQ6	Pre-B-cell leukemia transcription factor-interacting protein 1 OS=Homo sapiens (Human) OX=9606 GN=PBXIP1 PE=1 SV=1	PBXIP1	0.001	145.397	40	23	56	23	731	80.6
High	P20810	Calpastatin OS=Homo sapiens (Human) OX=9606 GN=CAST PE=1 SV=4	CAST	0.001	144.231	46	23	47	23	708	76.5
High	O15228	Dihydroxyacetone phosphate acyltransferase OS=Homo sapiens (Human) OX=9606 GN=GNPAT PE=1 SV=1	GNPAT	0.001	143.97	38	23	59	23	680	77.1
High	P13674	Prolyl 4-hydroxylase subunit alpha-1 OS=Homo sapiens (Human) OX=9606 GN=P4HA1 PE=1 SV=2	P4HA1	0.001	143.049	44	23	87	23	534	61
High	Q16799	Reticulon-1 OS=Homo sapiens (Human) OX=9606 GN=RTN1 PE=1 SV=1	RTN1	0.001	141.506	36	23	64	23	776	83.6
High	Q9NVH0	Exonuclease 3'-5' domain-containing protein 2 OS=Homo sapiens (Human) OX=9606 GN=EXD2 PE=1 SV=2	EXD2	0.001	141.283	46	23	53	23	621	70.3
High	P54802	Alpha-N-acetylglucosaminidase OS=Homo sapiens (Human) OX=9606 GN=NAGLU PE=1 SV=2	NAGLU	0.001	140.695	35	23	50	23	743	82.2
High	Q9NVH1	DnaJ homolog subfamily C member 11 OS=Homo sapiens (Human) OX=9606 GN=DNAJC11 PE=1 SV=2	DNAJC11	0.001	140.442	45	23	71	23	559	63.2
High	P78362	SRSF protein kinase 2 OS=Homo sapiens (Human) OX=9606 GN=SRPK2 PE=1 SV=3	SRPK2	0.001	139.283	41	23	64	23	688	77.5
High	Q9C0I1	Myotubularin-related protein 12 OS=Homo sapiens (Human) OX=9606 GN=MTMR12 PE=1 SV=2	MTMR12	0.001	135.926	43	23	82	23	747	86.1
High	Q7L775	EPM2A-interacting protein 1 OS=Homo sapiens (Human) OX=9606 GN=EPM2AIP1 PE=1 SV=1	EPM2AIP1	0.001	135.533	41	23	54	23	607	70.3
High	Q96TA2	ATP-dependent zinc metalloprotease YME1L1 OS=Homo sapiens (Human) OX=9606 GN=YME1L1 PE=1 SV=2	YME1L1	0.001	133.604	38	23	58	23	773	86.4
High	Q93050	V-type proton ATPase 116 kDa subunit a1 OS=Homo sapiens (Human) OX=9606 GN=ATP6V0A1 PE=1 SV=3	ATP6V0A1	0.001	132.708	27	23	47	23	837	96.4
High	O94927	HAUS augmin-like complex subunit 5 OS=Homo sapiens (Human) OX=9606 GN=HAUS5 PE=1 SV=2	HAUS5	0.001	132.654	42	23	44	23	633	71.6
High	Q9BUI4	DNA-directed RNA polymerase III subunit RPC3 OS=Homo sapiens (Human) OX=9606 GN=POLR3C PE=1 SV=1	POLR3C	0.001	130.708	41	23	53	23	534	60.6
High	Q5JTW2	Centrosomal protein of 78 kDa OS=Homo sapiens (Human) OX=9606 GN=CEP78 PE=1 SV=1	CEP78	0.001	129.293	42	23	53	23	689	76.3
High	Q6P3X3	Tetratricopeptide repeat protein 27 OS=Homo sapiens (Human) OX=9606 GN=TTC27 PE=1 SV=1	TTC27	0.001	128.133	31	23	44	23	843	96.6
[truncated: 6,691 more rows]
