# Supplementary material for: The autism-associated gene SYNGAP1 regulates human cortical neurogenesis
Source: Research Square preprint supplement (doi:10.21203/rs.3.rs-1610145/v1), 2022-05-10
Supplement: Supplementary file 3 [file 7dad183d73ef322cf19a40e8.xlsx]

## Sheet: Patient-Control res_df.anno
hgnc_symbol	Total counts	P-value (PatRas vs. D2)	FDR step up (PatRas vs. D2)	Ratio (PatRas vs. D2)	Fold change (PatRas vs. D2)	LSMean(PatRas) (PatRas vs. D2)	LSMean(D2) (PatRas vs. D2)	ensembl_gene_id	entrezgene_id	description
RPS4Y1	441	3.05e-09	6.1e-05	220	220	102	0.463	ENSG00000129824	6192	ribosomal protein S4 Y-linked 1 [Source:HGNC Symbol;Acc:HGNC:10425]
CHCHD2	125	7e-06	0.029	80.2	80.2	18.4	0.23	ENSG00000106153	51142	coiled-coil-helix-coiled-coil-helix domain containing 2 [Source:HGNC Symbol;Acc:HGNC:21645]
TP63	25.1	0.000705	0.0805	42.5	42.5	11.3	0.266	ENSG00000073282	8626	tumor protein p63 [Source:HGNC Symbol;Acc:HGNC:15979]
TWIST1	61.6	0.0075	0.184	42.1	42.1	28.4	0.674	ENSG00000122691	7291	twist family bHLH transcription factor 1 [Source:HGNC Symbol;Acc:HGNC:12428]
DDR2	36.1	6.47e-05	0.0502	35.3	35.3	10.4	0.294	ENSG00000162733	4921	discoidin domain receptor tyrosine kinase 2 [Source:HGNC Symbol;Acc:HGNC:2731]
DCN	41.3	0.000883	0.0875	32	32	19.3	0.601	ENSG00000011465	1634	decorin [Source:HGNC Symbol;Acc:HGNC:2705]
DLX1	21.4	0.000392	0.0713	31.1	31.1	8.01	0.258	ENSG00000144355	1745	distal-less homeobox 1 [Source:HGNC Symbol;Acc:HGNC:2914]
VEGFD	12.1	0.000179	0.0594	30.6	30.6	2.04	0.0665	ENSG00000165197	2277	vascular endothelial growth factor D [Source:HGNC Symbol;Acc:HGNC:3708]
HOXA1	35.6	0.00407	0.149	29.4	29.4	14.1	0.482	ENSG00000105991	3198	homeobox A1 [Source:HGNC Symbol;Acc:HGNC:5099]
LINC00461	64.4	0.0388	0.334	29.1	29.1	13.6	0.468	ENSG00000245526	NA	long intergenic non-protein coding RNA 461 [Source:HGNC Symbol;Acc:HGNC:42810]
NEUROD1	432	0.000172	0.0594	27.8	27.8	33.4	1.2	ENSG00000162992	4760	neuronal differentiation 1 [Source:HGNC Symbol;Acc:HGNC:7762]
ZNF558	26.5	3.56e-05	0.0502	26.1	26.1	2.24	0.0859	ENSG00000167785	148156	zinc finger protein 558 [Source:HGNC Symbol;Acc:HGNC:26422]
HOXB1	30.7	5.37e-05	0.0502	25.6	25.6	7.58	0.297	ENSG00000120094	3211	homeobox B1 [Source:HGNC Symbol;Acc:HGNC:5111]
KCNS2	7.84	0.00193	0.111	25.5	25.5	1.7	0.0665	ENSG00000156486	3788	potassium voltage-gated channel modifier subfamily S member 2 [Source:HGNC Symbol;Acc:HGNC:6301]
SIX1	223	0.000186	0.0594	24.6	24.6	25.2	1.02	ENSG00000126778	6495	SIX homeobox 1 [Source:HGNC Symbol;Acc:HGNC:10887]
PPP1R17	335	2.52e-06	0.0252	24.5	24.5	21	0.857	ENSG00000106341	10842	protein phosphatase 1 regulatory subunit 17 [Source:HGNC Symbol;Acc:HGNC:16973]
FOXD2	63.5	4.02e-05	0.0502	23.5	23.5	6.98	0.297	ENSG00000186564	2306	forkhead box D2 [Source:HGNC Symbol;Acc:HGNC:3803]
DCT	19.5	0.00488	0.157	21.8	21.8	6.28	0.288	ENSG00000080166	1638	dopachrome tautomerase [Source:HGNC Symbol;Acc:HGNC:2709]
SLFN11	10.9	7.3e-05	0.0521	21.2	21.2	3.28	0.155	ENSG00000172716	91607	schlafen family member 11 [Source:HGNC Symbol;Acc:HGNC:26633]
CHL1	5.44	0.000181	0.0594	20.9	20.9	0.988	0.0472	ENSG00000134121	10752	cell adhesion molecule L1 like [Source:HGNC Symbol;Acc:HGNC:1939]
GABRA4	2.64	0.000372	0.0694	20.7	20.7	0.978	0.0472	ENSG00000109158	2557	gamma-aminobutyric acid type A receptor subunit alpha4 [Source:HGNC Symbol;Acc:HGNC:4078]
MT1H	4.9	0.00323	0.136	20.7	20.7	2.18	0.105	ENSG00000205358	4496	metallothionein 1H [Source:HGNC Symbol;Acc:HGNC:7400]
CER1	3.45	0.000551	0.0765	20.6	20.6	0.971	0.0472	ENSG00000147869	9350	cerberus 1, DAN family BMP antagonist [Source:HGNC Symbol;Acc:HGNC:1862]
TXNRD2	6.19	0.000484	0.0724	20.1	20.1	2.5	0.125	ENSG00000184470	10587	thioredoxin reductase 2 [Source:HGNC Symbol;Acc:HGNC:18155]
MYBPC1	5.29	0.000225	0.0594	19.7	19.7	0.928	0.0472	ENSG00000196091	4604	myosin binding protein C1 [Source:HGNC Symbol;Acc:HGNC:7549]
SYT4	547	1.64e-05	0.041	19.5	19.5	48.9	2.51	ENSG00000132872	6860	synaptotagmin 4 [Source:HGNC Symbol;Acc:HGNC:11512]
TTTY2	2.05	0.00815	0.189	18.9	18.9	0.891	0.0472	ENSG00000212855	NA	testis-specific transcript, Y-linked 2 [Source:HGNC Symbol;Acc:HGNC:14023]
ALDH1A1	47	0.00039	0.0713	18	18	17.3	0.959	ENSG00000165092	216	aldehyde dehydrogenase 1 family member A1 [Source:HGNC Symbol;Acc:HGNC:402]
ALX1	29.8	0.0159	0.239	18	18	11.4	0.629	ENSG00000180318	8092	ALX homeobox 1 [Source:HGNC Symbol;Acc:HGNC:1494]
MIR99AHG	9.84	0.000339	0.0674	17.5	17.5	1.5	0.0859	ENSG00000215386	NA	mir-99a-let-7c cluster host gene [Source:HGNC Symbol;Acc:HGNC:1274]
COL3A1	31	0.0166	0.243	17.3	17.3	11.2	0.645	ENSG00000168542	1281	collagen type III alpha 1 chain [Source:HGNC Symbol;Acc:HGNC:2201]
PLXDC1	9.85	0.00837	0.189	17.3	17.3	4.47	0.258	ENSG00000161381	57125	plexin domain containing 1 [Source:HGNC Symbol;Acc:HGNC:20945]
H19	456	0.000245	0.0594	17.2	17.2	109	6.36	ENSG00000130600	NA	H19 imprinted maternally expressed transcript [Source:HGNC Symbol;Acc:HGNC:4713]
H19	456	0.000245	0.0594	17.2	17.2	109	6.36	ENSG00000288237	NA	H19 imprinted maternally expressed transcript [Source:HGNC Symbol;Acc:HGNC:4713]
HOXA2	7.7	0.000144	0.0594	17.1	17.1	0.806	0.0472	ENSG00000105996	3199	homeobox A2 [Source:HGNC Symbol;Acc:HGNC:5103]
KIF19	76.4	0.00396	0.148	17.1	17.1	19.5	1.14	ENSG00000196169	124602	kinesin family member 19 [Source:HGNC Symbol;Acc:HGNC:26735]
MYL4	8.39	0.00415	0.149	16.8	16.8	3.02	0.18	ENSG00000198336	4635	myosin light chain 4 [Source:HGNC Symbol;Acc:HGNC:7585]
UCA1	10.6	0.00296	0.131	16.7	16.7	3.43	0.206	ENSG00000214049	NA	urothelial cancer associated 1 [Source:HGNC Symbol;Acc:HGNC:37126]
PDK4	19.6	0.00405	0.149	16.5	16.5	8.45	0.513	ENSG00000004799	5166	pyruvate dehydrogenase kinase 4 [Source:HGNC Symbol;Acc:HGNC:8812]
ADAMTS5	68	2.94e-05	0.0502	16.4	16.4	6.05	0.369	ENSG00000154736	11096	ADAM metallopeptidase with thrombospondin type 1 motif 5 [Source:HGNC Symbol;Acc:HGNC:221]
ISL1	195	4.44e-05	0.0502	16.4	16.4	10.3	0.629	ENSG00000016082	3670	ISL LIM homeobox 1 [Source:HGNC Symbol;Acc:HGNC:6132]
SLC17A6	26	0.000609	0.0789	16.4	16.4	2.04	0.125	ENSG00000091664	57084	solute carrier family 17 member 6 [Source:HGNC Symbol;Acc:HGNC:16703]
DMRTC1B	6.47	0.00043	0.0715	16.2	16.2	1.85	0.114	ENSG00000184911	728656	DMRT like family C1B [Source:HGNC Symbol;Acc:HGNC:31686]
LDOC1	18.3	0.00216	0.118	16.1	16.1	1.83	0.114	ENSG00000182195	23641	LDOC1 regulator of NFKB signaling [Source:HGNC Symbol;Acc:HGNC:6548]
MAB21L4	16.8	0.00297	0.131	16.1	16.1	4.94	0.308	ENSG00000172478	79919	mab-21 like 4 [Source:HGNC Symbol;Acc:HGNC:26216]
FLI1	16.2	0.0369	0.328	16	16	7.13	0.446	ENSG00000151702	2313	Fli-1 proto-oncogene, ETS transcription factor [Source:HGNC Symbol;Acc:HGNC:3749]
PALMD	4.47	0.00192	0.111	15.9	15.9	1.5	0.0943	ENSG00000099260	54873	palmdelphin [Source:HGNC Symbol;Acc:HGNC:15846]
GASK1B	3.98	0.022	0.272	15.8	15.8	1.05	0.0665	ENSG00000164125	51313	golgi associated kinase 1B [Source:HGNC Symbol;Acc:HGNC:25312]
NRK	16.2	0.00155	0.108	15.7	15.7	3.78	0.241	ENSG00000123572	203447	Nik related kinase [Source:HGNC Symbol;Acc:HGNC:25391]
LRRC53	81.4	0.00043	0.0715	15.6	15.6	3.42	0.219	ENSG00000162621	105378803	leucine rich repeat containing 53 [Source:HGNC Symbol;Acc:HGNC:25255]
FAM197Y3	1.67	0.0148	0.234	15.5	15.5	0.732	0.0472	ENSG00000230066	NA	family with sequence similarity 197 Y-linked member 3 [Source:HGNC Symbol;Acc:HGNC:37465]
SNAP25	30	0.00083	0.0852	15.4	15.4	2.22	0.144	ENSG00000132639	6616	synaptosome associated protein 25 [Source:HGNC Symbol;Acc:HGNC:11132]
COL25A1	162	7.25e-06	0.029	14.5	14.5	30.7	2.12	ENSG00000188517	84570	collagen type XXV alpha 1 chain [Source:HGNC Symbol;Acc:HGNC:18603]
CDH15	45	0.000658	0.0789	14.2	14.2	2.32	0.163	ENSG00000129910	1013	cadherin 15 [Source:HGNC Symbol;Acc:HGNC:1754]
ATP2B2	54.2	0.00021	0.0594	14.1	14.1	6.47	0.457	ENSG00000157087	491	ATPase plasma membrane Ca2+ transporting 2 [Source:HGNC Symbol;Acc:HGNC:815]
SNCG	96.6	0.00061	0.0789	13.9	13.9	6.49	0.466	ENSG00000173267	6623	synuclein gamma [Source:HGNC Symbol;Acc:HGNC:11141]
GBP1	8.87	0.00255	0.126	13.8	13.8	0.915	0.0665	ENSG00000117228	2633	guanylate binding protein 1 [Source:HGNC Symbol;Acc:HGNC:4182]
LINC01179	2.04	0.00118	0.0956	13.5	13.5	0.9	0.0665	ENSG00000249500	NA	long intergenic non-protein coding RNA 1179 [Source:HGNC Symbol;Acc:HGNC:49556]
ZAP70	2.93	0.00155	0.107	13.4	13.4	0.892	0.0665	ENSG00000115085	7535	zeta chain of T cell receptor associated protein kinase 70 [Source:HGNC Symbol;Acc:HGNC:12858]
LMOD3	9.57	0.0016	0.109	13.3	13.3	1.4	0.105	ENSG00000163380	56203	leiomodin 3 [Source:HGNC Symbol;Acc:HGNC:6649]
MT1G	8.71	0.00476	0.157	13.3	13.3	3.72	0.28	ENSG00000125144	4495	metallothionein 1G [Source:HGNC Symbol;Acc:HGNC:7399]
CTXND1	117	0.000135	0.0594	13	13	3.57	0.275	ENSG00000259417	100996492	cortexin domain containing 1 [Source:HGNC Symbol;Acc:HGNC:50507]
PAG1	62	6.52e-05	0.0502	13	13	8.6	0.66	ENSG00000076641	55824	phosphoprotein membrane anchor with glycosphingolipid microdomains 1 [Source:HGNC Symbol;Acc:HGNC:30043]
C1orf105	3.06	0.0208	0.267	12.9	12.9	1.11	0.0859	ENSG00000180999	92346	chromosome 1 open reading frame 105 [Source:HGNC Symbol;Acc:HGNC:29591]
RARB	47	0.00295	0.131	12.9	12.9	13.8	1.07	ENSG00000077092	5915	retinoic acid receptor beta [Source:HGNC Symbol;Acc:HGNC:9865]
TLX3	61.5	0.000247	0.0594	12.6	12.6	2.27	0.18	ENSG00000164438	30012	T cell leukemia homeobox 3 [Source:HGNC Symbol;Acc:HGNC:13532]
LRRK2	32.4	0.00968	0.201	12.5	12.5	3.56	0.286	ENSG00000188906	120892	leucine rich repeat kinase 2 [Source:HGNC Symbol;Acc:HGNC:18618]
NELL1	4.51	0.00677	0.178	12.3	12.3	1.73	0.141	ENSG00000165973	4745	neural EGFL like 1 [Source:HGNC Symbol;Acc:HGNC:7750]
SHOX2	14.2	0.0105	0.207	12.3	12.3	2.31	0.189	ENSG00000168779	6474	short stature homeobox 2 [Source:HGNC Symbol;Acc:HGNC:10854]
B3GALT2	42.1	0.00173	0.109	12.2	12.2	2.1	0.172	ENSG00000162630	8707	beta-1,3-galactosyltransferase 2 [Source:HGNC Symbol;Acc:HGNC:917]
TMPRSS4	59.2	0.0024	0.123	12.2	12.2	24.7	2.02	ENSG00000137648	56649	transmembrane serine protease 4 [Source:HGNC Symbol;Acc:HGNC:11878]
ERVW-1	10.5	0.000481	0.0724	12.1	12.1	2.38	0.197	ENSG00000242950	30816	endogenous retrovirus group W member 1, envelope [Source:HGNC Symbol;Acc:HGNC:13525]
MMRN1	205	0.000974	0.0892	12.1	12.1	40.2	3.31	ENSG00000138722	22915	multimerin 1 [Source:HGNC Symbol;Acc:HGNC:7178]
COMT	19.9	0.000191	0.0594	11.9	11.9	7.54	0.632	ENSG00000093010	1312	catechol-O-methyltransferase [Source:HGNC Symbol;Acc:HGNC:2228]
SCN3A	111	0.000202	0.0594	11.9	11.9	10.4	0.879	ENSG00000153253	6328	sodium voltage-gated channel alpha subunit 3 [Source:HGNC Symbol;Acc:HGNC:10590]
SUSD2	162	0.000271	0.0602	11.9	11.9	26.9	2.26	ENSG00000099994	56241	sushi domain containing 2 [Source:HGNC Symbol;Acc:HGNC:30667]
EDN3	20.8	0.0224	0.273	11.7	11.7	8.97	0.768	ENSG00000124205	1908	endothelin 3 [Source:HGNC Symbol;Acc:HGNC:3178]
POU4F1	853	0.000355	0.0678	11.7	11.7	67.8	5.78	ENSG00000152192	5457	POU class 4 homeobox 1 [Source:HGNC Symbol;Acc:HGNC:9218]
POU3F3	21	4.57e-05	0.0502	11.5	11.5	4.35	0.38	ENSG00000198914	5455	POU class 3 homeobox 3 [Source:HGNC Symbol;Acc:HGNC:9216]
HRH1	18.7	0.00368	0.144	11.4	11.4	1.74	0.152	ENSG00000196639	3269	histamine receptor H1 [Source:HGNC Symbol;Acc:HGNC:5182]
HOXA3	2.83	0.0219	0.271	11.3	11.3	0.848	0.0749	ENSG00000105997	3200	homeobox A3 [Source:HGNC Symbol;Acc:HGNC:5104]
TLX2	92.7	0.000517	0.0748	11.3	11.3	8.02	0.707	ENSG00000115297	3196	T cell leukemia homeobox 2 [Source:HGNC Symbol;Acc:HGNC:5057]
BAALC	182	3.97e-05	0.0502	11.2	11.2	31.6	2.82	ENSG00000164929	79870	BAALC binder of MAP3K1 and KLF4 [Source:HGNC Symbol;Acc:HGNC:14333]
FAM181A-AS1	6.24	0.00385	0.146	11	11	1.04	0.0943	ENSG00000258584	NA	FAM181A antisense RNA 1 [Source:HGNC Symbol;Acc:HGNC:20133]
FAM181A-AS1	6.24	0.00385	0.146	11	11	1.04	0.0943	ENSG00000281032	NA	FAM181A antisense RNA 1 [Source:HGNC Symbol;Acc:HGNC:20133]
LINC02487	25.5	0.000445	0.0715	10.8	10.8	5.76	0.532	ENSG00000203688	NA	long intergenic non-protein coding RNA 2487 [Source:HGNC Symbol;Acc:HGNC:53466]
TMEM204	3.81	0.00239	0.123	10.7	10.7	1.42	0.133	ENSG00000131634	79652	transmembrane protein 204 [Source:HGNC Symbol;Acc:HGNC:14158]
GJD2	3.44	0.00392	0.148	10.4	10.4	0.781	0.0749	ENSG00000159248	57369	gap junction protein delta 2 [Source:HGNC Symbol;Acc:HGNC:19154]
NEUROD4	164	0.00675	0.178	10.4	10.4	16	1.54	ENSG00000123307	58158	neuronal differentiation 4 [Source:HGNC Symbol;Acc:HGNC:13802]
TRH	63.1	0.022	0.271	10.4	10.4	14.1	1.35	ENSG00000170893	7200	thyrotropin releasing hormone [Source:HGNC Symbol;Acc:HGNC:12298]
BARX2	10.8	0.0351	0.324	10.3	10.3	4.59	0.444	ENSG00000043039	8538	BARX homeobox 2 [Source:HGNC Symbol;Acc:HGNC:956]
HHIP	32	0.00628	0.173	10.3	10.3	5.47	0.532	ENSG00000164161	64399	hedgehog interacting protein [Source:HGNC Symbol;Acc:HGNC:14866]
POU4F2	18	0.00326	0.137	10.3	10.3	0.688	0.0665	ENSG00000151615	5458	POU class 4 homeobox 2 [Source:HGNC Symbol;Acc:HGNC:9219]
TEK	29.8	0.000262	0.0594	10.2	10.2	6.91	0.676	ENSG00000120156	7010	TEK receptor tyrosine kinase [Source:HGNC Symbol;Acc:HGNC:11724]
ST18	13.7	0.000218	0.0594	10.1	10.1	2.6	0.258	ENSG00000147488	9705	ST18 C2H2C-type zinc finger transcription factor [Source:HGNC Symbol;Acc:HGNC:18695]
IL36RN	11.6	0.00738	0.184	10	10	3.86	0.385	ENSG00000136695	26525	interleukin 36 receptor antagonist [Source:HGNC Symbol;Acc:HGNC:15561]
NEUROG1	198	0.000304	0.0621	9.91	9.91	20.9	2.11	ENSG00000181965	4762	neurogenin 1 [Source:HGNC Symbol;Acc:HGNC:7764]
PWAR5	12.4	0.0204	0.266	9.88	9.88	4.48	0.453	ENSG00000279192	NA	Prader Willi/Angelman region RNA 5 [Source:HGNC Symbol;Acc:HGNC:30090]
ABCA13	13.3	0.00156	0.108	9.87	9.87	3.2	0.324	ENSG00000179869	154664	ATP binding cassette subfamily A member 13 [Source:HGNC Symbol;Acc:HGNC:14638]
PANTR1	2.03	0.0331	0.316	9.84	9.84	0.464	0.0472	ENSG00000233639	NA	POU3F3 adjacent non-coding transcript 1 [Source:HGNC Symbol;Acc:HGNC:49513]
ZNF728	1.09	0.00948	0.2	9.7	9.7	0.457	0.0472	ENSG00000269067	388523	zinc finger protein 728 [Source:HGNC Symbol;Acc:HGNC:32463]
AICDA	3.38	0.0151	0.235	9.66	9.66	1.47	0.152	ENSG00000111732	57379	activation induced cytidine deaminase [Source:HGNC Symbol;Acc:HGNC:13203]
EBF2	107	0.00186	0.111	9.66	9.66	8.18	0.848	ENSG00000221818	64641	EBF transcription factor 2 [Source:HGNC Symbol;Acc:HGNC:19090]
FRMPD1	14.3	0.00801	0.189	9.64	9.64	1.02	0.105	ENSG00000070601	22844	FERM and PDZ domain containing 1 [Source:HGNC Symbol;Acc:HGNC:29159]
PART1	3.07	0.0024	0.123	9.59	9.59	1.2	0.125	ENSG00000152931	NA	prostate androgen-regulated transcript 1 [Source:HGNC Symbol;Acc:HGNC:17263]
GRM5	1.19	0.0133	0.224	9.57	9.57	0.452	0.0472	ENSG00000168959	2915	glutamate metabotropic receptor 5 [Source:HGNC Symbol;Acc:HGNC:4597]
NDST3	102	0.000131	0.0594	9.52	9.52	14.5	1.52	ENSG00000164100	9348	N-deacetylase and N-sulfotransferase 3 [Source:HGNC Symbol;Acc:HGNC:7682]
LHX1-DT	2.32	0.00641	0.174	9.51	9.51	0.817	0.0859	ENSG00000277268	NA	LHX1 divergent transcript [Source:HGNC Symbol;Acc:HGNC:53778]
LHX1-DT	2.32	0.00641	0.174	9.51	9.51	0.817	0.0859	ENSG00000281998	NA	LHX1 divergent transcript [Source:HGNC Symbol;Acc:HGNC:53778]
KIAA1211L	9.15	0.027	0.293	9.43	9.43	2.35	0.249	ENSG00000196872	343990	KIAA1211 like [Source:HGNC Symbol;Acc:HGNC:33454]
HLX	1.59	0.00287	0.13	9.37	9.37	0.63	0.0672	ENSG00000136630	3142	H2.0 like homeobox [Source:HGNC Symbol;Acc:HGNC:4978]
FILIP1L	37.9	0.000214	0.0594	9.32	9.32	8.66	0.928	ENSG00000168386	11259	filamin A interacting protein 1 like [Source:HGNC Symbol;Acc:HGNC:24589]
CASP4	2.69	0.018	0.254	9.31	9.31	0.981	0.105	ENSG00000196954	837	caspase 4 [Source:HGNC Symbol;Acc:HGNC:1505]
CMPK2	5.02	0.000699	0.0805	9.3	9.3	1.6	0.172	ENSG00000134326	129607	cytidine/uridine monophosphate kinase 2 [Source:HGNC Symbol;Acc:HGNC:27015]
CPA1	2.21	0.00148	0.106	9.3	9.3	0.439	0.0472	ENSG00000091704	1357	carboxypeptidase A1 [Source:HGNC Symbol;Acc:HGNC:2296]
ONECUT3	40.6	0.0094	0.2	9.28	9.28	4.61	0.496	ENSG00000205922	390874	one cut homeobox 3 [Source:HGNC Symbol;Acc:HGNC:13399]
FAM181A	14.3	0.0131	0.223	9.2	9.2	2.47	0.269	ENSG00000140067	90050	family with sequence similarity 181 member A [Source:HGNC Symbol;Acc:HGNC:20491]
FAM181A	14.3	0.0131	0.223	9.2	9.2	2.47	0.269	ENSG00000273533	90050	family with sequence similarity 181 member A [Source:HGNC Symbol;Acc:HGNC:20491]
RSPO2	137	0.0265	0.292	9.2	9.2	13.4	1.45	ENSG00000147655	340419	R-spondin 2 [Source:HGNC Symbol;Acc:HGNC:28583]
BDKRB2	12.2	0.0049	0.157	9.16	9.16	3.1	0.338	ENSG00000168398	624	bradykinin receptor B2 [Source:HGNC Symbol;Acc:HGNC:1030]
TUBA4B	1.16	0.0313	0.309	9.02	9.02	0.426	0.0472	ENSG00000243910	80086	tubulin alpha 4b [Source:HGNC Symbol;Acc:HGNC:18637]
TBX5	1.16	0.0441	0.346	9	9	0.424	0.0472	ENSG00000089225	6910	T-box transcription factor 5 [Source:HGNC Symbol;Acc:HGNC:11604]
RGS5	150	0.00133	0.101	8.98	8.98	32.8	3.66	ENSG00000143248	8490	regulator of G protein signaling 5 [Source:HGNC Symbol;Acc:HGNC:10001]
DLX2	42.9	0.00133	0.101	8.96	8.96	13.5	1.5	ENSG00000115844	1746	distal-less homeobox 2 [Source:HGNC Symbol;Acc:HGNC:2915]
INSM1	244	0.0019	0.111	8.84	8.84	18	2.03	ENSG00000173404	3642	INSM transcriptional repressor 1 [Source:HGNC Symbol;Acc:HGNC:6090]
TRMT9B	157	0.000262	0.0594	8.84	8.84	16.8	1.9	ENSG00000250305	57604	tRNA methyltransferase 9B (putative) [Source:HGNC Symbol;Acc:HGNC:26725]
HHIP-AS1	10.9	0.000893	0.0877	8.79	8.79	2.78	0.316	ENSG00000248890	NA	HHIP antisense RNA 1 [Source:HGNC Symbol;Acc:HGNC:44182]
WHAMMP2	2.62	0.00484	0.157	8.67	8.67	0.89	0.103	ENSG00000248334	NA	WAS protein homolog associated with actin, golgi membranes and microtubules pseudogene 2 [Source:HGNC Symbol;Acc:HGNC:32360]
WHAMMP2	2.62	0.00484	0.157	8.67	8.67	0.89	0.103	ENSG00000282540	NA	WAS protein homolog associated with actin, golgi membranes and microtubules pseudogene 2 [Source:HGNC Symbol;Acc:HGNC:32360]
TFPI2	2.76	0.0083	0.189	8.65	8.65	0.911	0.105	ENSG00000105825	7980	tissue factor pathway inhibitor 2 [Source:HGNC Symbol;Acc:HGNC:11761]
INSYN1	96	8.74e-05	0.0521	8.57	8.57	9.32	1.09	ENSG00000205363	388135	inhibitory synaptic factor 1 [Source:HGNC Symbol;Acc:HGNC:33753]
LINC02838	1.14	0.0148	0.234	8.52	8.52	0.402	0.0472	ENSG00000285536	NA	long intergenic non-protein coding RNA 2838 [Source:HGNC Symbol;Acc:HGNC:54372]
DLX6-AS1	13.9	0.00228	0.121	8.49	8.49	5.53	0.652	ENSG00000231764	NA	DLX6 antisense RNA 1 [Source:HGNC Symbol;Acc:HGNC:37151]
KCNF1	5.52	0.0148	0.234	8.46	8.46	1.78	0.211	ENSG00000162975	3754	potassium voltage-gated channel modifier subfamily F member 1 [Source:HGNC Symbol;Acc:HGNC:6246]
ZNF572	2.21	0.048	0.361	8.38	8.38	0.953	0.114	ENSG00000180938	137209	zinc finger protein 572 [Source:HGNC Symbol;Acc:HGNC:26758]
ADRB1	2.29	0.0429	0.343	8.34	8.34	0.878	0.105	ENSG00000043591	153	adrenoceptor beta 1 [Source:HGNC Symbol;Acc:HGNC:285]
ADCY2	16.3	0.00279	0.129	8.3	8.3	3.04	0.366	ENSG00000078295	108	adenylate cyclase 2 [Source:HGNC Symbol;Acc:HGNC:233]
NEFM	1550	0.000163	0.0594	8.29	8.29	112	13.6	ENSG00000104722	4741	neurofilament medium [Source:HGNC Symbol;Acc:HGNC:7734]
KL	7.17	0.00823	0.189	8.28	8.28	2.23	0.269	ENSG00000133116	9365	klotho [Source:HGNC Symbol;Acc:HGNC:6344]
LINC01164	2.49	0.00176	0.11	8.27	8.27	0.39	0.0472	ENSG00000189275	NA	long intergenic non-protein coding RNA 1164 [Source:HGNC Symbol;Acc:HGNC:49533]
ASIC4	4.19	0.0107	0.208	8.24	8.24	0.777	0.0943	ENSG00000072182	55515	acid sensing ion channel subunit family member 4 [Source:HGNC Symbol;Acc:HGNC:21263]
STMN4	40.7	0.000736	0.0812	8.24	8.24	2.95	0.358	ENSG00000015592	81551	stathmin 4 [Source:HGNC Symbol;Acc:HGNC:16078]
FOXP2	47.2	0.000149	0.0594	8.2	8.2	10.2	1.24	ENSG00000128573	93986	forkhead box P2 [Source:HGNC Symbol;Acc:HGNC:13875]
NTRK1	30.5	0.000653	0.0789	8.15	8.15	1.08	0.133	ENSG00000198400	4914	neurotrophic receptor tyrosine kinase 1 [Source:HGNC Symbol;Acc:HGNC:8031]
MXRA5	104	0.00194	0.111	8.11	8.11	36.5	4.49	ENSG00000101825	25878	matrix remodeling associated 5 [Source:HGNC Symbol;Acc:HGNC:7539]
SEMA3D	68.3	0.00197	0.113	8.1	8.1	26.3	3.25	ENSG00000153993	223117	semaphorin 3D [Source:HGNC Symbol;Acc:HGNC:10726]
RAB17	2.69	0.0306	0.306	8.09	8.09	1.01	0.125	ENSG00000124839	64284	RAB17, member RAS oncogene family [Source:HGNC Symbol;Acc:HGNC:16523]
CERKL	12.7	0.00338	0.138	8.08	8.08	1.39	0.172	ENSG00000188452	375298	ceramide kinase like [Source:HGNC Symbol;Acc:HGNC:21699]
MT2A	46.7	0.000758	0.0824	8.08	8.08	18.1	2.24	ENSG00000125148	4502	metallothionein 2A [Source:HGNC Symbol;Acc:HGNC:7406]
NOL4	23.8	0.00261	0.127	8.07	8.07	4.43	0.549	ENSG00000101746	8715	nucleolar protein 4 [Source:HGNC Symbol;Acc:HGNC:7870]
MGAT4C	7.54	0.0194	0.26	8.05	8.05	2.47	0.308	ENSG00000182050	25834	MGAT4 family member C [Source:HGNC Symbol;Acc:HGNC:30871]
MGAT4C	7.54	0.0194	0.26	8.05	8.05	2.47	0.308	ENSG00000283530	25834	MGAT4 family member C [Source:HGNC Symbol;Acc:HGNC:30871]
MGAT4C	7.54	0.0194	0.26	8.05	8.05	2.47	0.308	ENSG00000285137	25834	MGAT4 family member C [Source:HGNC Symbol;Acc:HGNC:30871]
CPLX2	53.3	0.0051	0.159	7.94	7.94	7.55	0.951	ENSG00000145920	10814	complexin 2 [Source:HGNC Symbol;Acc:HGNC:2310]
WDR49	2.1	0.00184	0.111	7.88	7.88	0.524	0.0665	ENSG00000174776	151790	WD repeat domain 49 [Source:HGNC Symbol;Acc:HGNC:26587]
BGN	67.7	0.00118	0.0956	7.87	7.87	17.5	2.22	ENSG00000182492	633	biglycan [Source:HGNC Symbol;Acc:HGNC:1044]
COL5A2	954	3.5e-05	0.0502	7.85	7.85	214	27.2	ENSG00000204262	1290	collagen type V alpha 2 chain [Source:HGNC Symbol;Acc:HGNC:2210]
GPRIN3	28.2	0.0048	0.157	7.81	7.81	6.89	0.882	ENSG00000185477	285513	GPRIN family member 3 [Source:HGNC Symbol;Acc:HGNC:27733]
RFX4	86.2	0.0298	0.303	7.75	7.75	10.1	1.3	ENSG00000111783	5992	regulatory factor X4 [Source:HGNC Symbol;Acc:HGNC:9985]
CYP1A2	3.62	0.0017	0.109	7.7	7.7	1.17	0.152	ENSG00000140505	1544	cytochrome P450 family 1 subfamily A member 2 [Source:HGNC Symbol;Acc:HGNC:2596]
CSRP1	116	0.000421	0.0715	7.67	7.67	35.6	4.64	ENSG00000159176	1465	cysteine and glycine rich protein 1 [Source:HGNC Symbol;Acc:HGNC:2469]
PDGFRB	158	0.00081	0.0849	7.63	7.63	32.8	4.3	ENSG00000113721	5159	platelet derived growth factor receptor beta [Source:HGNC Symbol;Acc:HGNC:8804]
VGLL1	31.6	0.00138	0.101	7.61	7.61	9.2	1.21	ENSG00000102243	51442	vestigial like family member 1 [Source:HGNC Symbol;Acc:HGNC:20985]
NTF4	4.07	0.0019	0.111	7.58	7.58	1.43	0.189	ENSG00000225950	4909	neurotrophin 4 [Source:HGNC Symbol;Acc:HGNC:8024]
GALNT5	16.2	0.00668	0.177	7.57	7.57	4.82	0.638	ENSG00000136542	11227	polypeptide N-acetylgalactosaminyltransferase 5 [Source:HGNC Symbol;Acc:HGNC:4127]
CRYL1	17.4	0.000441	0.0715	7.49	7.49	3.35	0.446	ENSG00000165475	51084	crystallin lambda 1 [Source:HGNC Symbol;Acc:HGNC:18246]
DUSP26	14.2	0.0128	0.222	7.4	7.4	2.87	0.388	ENSG00000133878	78986	dual specificity phosphatase 26 [Source:HGNC Symbol;Acc:HGNC:28161]
CDH5	8.33	0.0022	0.119	7.27	7.27	2.46	0.338	ENSG00000179776	1003	cadherin 5 [Source:HGNC Symbol;Acc:HGNC:1764]
MEOX2	13.2	0.00798	0.189	7.24	7.24	1.1	0.152	ENSG00000106511	4223	mesenchyme homeobox 2 [Source:HGNC Symbol;Acc:HGNC:7014]
SLC6A3	64.7	9.86e-05	0.0548	7.24	7.24	6.4	0.885	ENSG00000276996	6531	solute carrier family 6 member 3 [Source:HGNC Symbol;Acc:HGNC:11049]
SLC6A3	64.7	9.86e-05	0.0548	7.24	7.24	6.4	0.885	ENSG00000142319	6531	solute carrier family 6 member 3 [Source:HGNC Symbol;Acc:HGNC:11049]
CFTR	36.7	0.00577	0.167	7.23	7.23	12.8	1.77	ENSG00000001626	1080	CF transmembrane conductance regulator [Source:HGNC Symbol;Acc:HGNC:1884]
P2RX3	126	9.85e-05	0.0548	7.19	7.19	10	1.39	ENSG00000109991	5024	purinergic receptor P2X 3 [Source:HGNC Symbol;Acc:HGNC:8534]
FGF3	4.93	0.00798	0.189	7.13	7.13	1.88	0.264	ENSG00000186895	2248	fibroblast growth factor 3 [Source:HGNC Symbol;Acc:HGNC:3681]
CYP1A1	221	0.00161	0.109	7.1	7.1	54.4	7.66	ENSG00000140465	1543	cytochrome P450 family 1 subfamily A member 1 [Source:HGNC Symbol;Acc:HGNC:2595]
TMEM117	3.28	0.00304	0.133	7.1	7.1	1	0.141	ENSG00000139173	84216	transmembrane protein 117 [Source:HGNC Symbol;Acc:HGNC:25308]
SPARCL1	3.41	0.00385	0.146	7.07	7.07	1.27	0.18	ENSG00000152583	8404	SPARC like 1 [Source:HGNC Symbol;Acc:HGNC:11220]
RGS7	30.1	0.0106	0.208	7.06	7.06	4.71	0.668	ENSG00000182901	6000	regulator of G protein signaling 7 [Source:HGNC Symbol;Acc:HGNC:10003]
GDF7	152	0.00106	0.092	7.02	7.02	15.6	2.23	ENSG00000143869	151449	growth differentiation factor 7 [Source:HGNC Symbol;Acc:HGNC:4222]
POSTN	19.1	0.000466	0.0715	7.02	7.02	3.27	0.466	ENSG00000133110	10631	periostin [Source:HGNC Symbol;Acc:HGNC:16953]
SMIM35	1.63	0.0106	0.208	7.01	7.01	0.331	0.0472	ENSG00000255274	NA	small integral membrane protein 35 [Source:HGNC Symbol;Acc:HGNC:44179]
NTRK2	52	1.37e-05	0.0391	7	7	13.3	1.9	ENSG00000148053	4915	neurotrophic receptor tyrosine kinase 2 [Source:HGNC Symbol;Acc:HGNC:8032]
OLIG2	18.6	0.00542	0.164	6.98	6.98	1.38	0.197	ENSG00000205927	10215	oligodendrocyte transcription factor 2 [Source:HGNC Symbol;Acc:HGNC:9398]
SP110	10	0.000953	0.0891	6.98	6.98	2.31	0.331	ENSG00000135899	3431	SP110 nuclear body protein [Source:HGNC Symbol;Acc:HGNC:5401]
CPNE5	4.77	0.0455	0.35	6.93	6.93	1.62	0.233	ENSG00000124772	57699	copine 5 [Source:HGNC Symbol;Acc:HGNC:2318]
ABCA9	5.77	0.00375	0.144	6.89	6.89	1.83	0.266	ENSG00000154258	10350	ATP binding cassette subfamily A member 9 [Source:HGNC Symbol;Acc:HGNC:39]
TLL1	17.8	0.00851	0.19	6.85	6.85	7.15	1.04	ENSG00000038295	7092	tolloid like 1 [Source:HGNC Symbol;Acc:HGNC:11843]
ELAVL3	426	0.0032	0.136	6.83	6.83	26.1	3.83	ENSG00000196361	1995	ELAV like RNA binding protein 3 [Source:HGNC Symbol;Acc:HGNC:3314]
CDX1	7.15	0.00226	0.121	6.82	6.82	1.55	0.227	ENSG00000113722	1044	caudal type homeobox 1 [Source:HGNC Symbol;Acc:HGNC:1805]
SLC5A7	3.4	0.0145	0.233	6.82	6.82	1.1	0.161	ENSG00000115665	60482	solute carrier family 5 member 7 [Source:HGNC Symbol;Acc:HGNC:14025]
GPR149	3.68	0.0292	0.301	6.81	6.81	0.976	0.143	ENSG00000174948	344758	G protein-coupled receptor 149 [Source:HGNC Symbol;Acc:HGNC:23627]
MAB21L1	10.3	0.00403	0.149	6.81	6.81	2.19	0.322	ENSG00000180660	4081	mab-21 like 1 [Source:HGNC Symbol;Acc:HGNC:6757]
MYH6	11.3	0.0222	0.272	6.78	6.78	2.8	0.413	ENSG00000197616	4624	myosin heavy chain 6 [Source:HGNC Symbol;Acc:HGNC:7576]
SFRP4	1.94	0.0182	0.255	6.78	6.78	0.714	0.105	ENSG00000106483	6424	secreted frizzled related protein 4 [Source:HGNC Symbol;Acc:HGNC:10778]
MIR1-1HG-AS1	14.5	0.00387	0.146	6.77	6.77	1.11	0.163	ENSG00000174403	NA	MIR1-1HG antisense RNA 1 [Source:HGNC Symbol;Acc:HGNC:26393]
ADAMTSL4	41.4	0.00607	0.17	6.71	6.71	13.5	2.02	ENSG00000143382	54507	ADAMTS like 4 [Source:HGNC Symbol;Acc:HGNC:19706]
HSD17B2	2.83	0.00622	0.172	6.71	6.71	0.706	0.105	ENSG00000086696	3294	hydroxysteroid 17-beta dehydrogenase 2 [Source:HGNC Symbol;Acc:HGNC:5211]
KCNJ15	1.45	0.00889	0.194	6.66	6.66	0.573	0.0859	ENSG00000157551	3772	potassium inwardly rectifying channel subfamily J member 15 [Source:HGNC Symbol;Acc:HGNC:6261]
C1QTNF3-AMACR	5.94	0.00571	0.167	6.65	6.65	0.554	0.0833	ENSG00000273294	NA	C1QTNF3-AMACR readthrough (NMD candidate) [Source:HGNC Symbol;Acc:HGNC:49198]
CDH19	7.24	0.0289	0.301	6.63	6.63	0.753	0.114	ENSG00000071991	28513	cadherin 19 [Source:HGNC Symbol;Acc:HGNC:1758]
INPP4B	22.5	0.000936	0.0889	6.63	6.63	6.13	0.924	ENSG00000109452	8821	inositol polyphosphate-4-phosphatase type II B [Source:HGNC Symbol;Acc:HGNC:6075]
ZNF208	2.65	0.0461	0.353	6.6	6.6	1.12	0.169	ENSG00000160321	7757	zinc finger protein 208 [Source:HGNC Symbol;Acc:HGNC:12999]
PRSS56	14	0.0148	0.234	6.59	6.59	0.95	0.144	ENSG00000237412	646960	serine protease 56 [Source:HGNC Symbol;Acc:HGNC:39433]
GAPDHP62	1.76	0.0232	0.276	6.57	6.57	0.327	0.0498	ENSG00000251013	NA	glyceraldehyde 3 phosphate dehydrogenase pseudogene 62 [Source:HGNC Symbol;Acc:HGNC:4156]
CSGALNACT1	6.9	0.00823	0.189	6.55	6.55	1.89	0.288	ENSG00000147408	55790	chondroitin sulfate N-acetylgalactosaminyltransferase 1 [Source:HGNC Symbol;Acc:HGNC:24290]
LINC00643	1.34	0.0221	0.272	6.5	6.5	0.487	0.0749	ENSG00000186369	NA	long intergenic non-protein coding RNA 643 [Source:HGNC Symbol;Acc:HGNC:44296]
HOXB-AS1	3.8	0.00322	0.136	6.46	6.46	0.594	0.0919	ENSG00000230148	NA	HOXB cluster antisense RNA 1 [Source:HGNC Symbol;Acc:HGNC:43744]
KLHL40	13.1	0.00445	0.154	6.42	6.42	0.427	0.0665	ENSG00000157119	131377	kelch like family member 40 [Source:HGNC Symbol;Acc:HGNC:30372]
FOXI2	41.7	0.00487	0.157	6.41	6.41	14.7	2.29	ENSG00000186766	399823	forkhead box I2 [Source:HGNC Symbol;Acc:HGNC:32448]
ACTG1P10	1.52	0.00874	0.193	6.39	6.39	0.425	0.0665	ENSG00000231340	NA	actin gamma 1 pseudogene 10 [Source:HGNC Symbol;Acc:HGNC:155]
JPH2	13.6	0.00953	0.2	6.39	6.39	2.21	0.346	ENSG00000149596	57158	junctophilin 2 [Source:HGNC Symbol;Acc:HGNC:14202]
CHRNA1	2.52	0.00431	0.153	6.38	6.38	0.301	0.0472	ENSG00000138435	1134	cholinergic receptor nicotinic alpha 1 subunit [Source:HGNC Symbol;Acc:HGNC:1955]
LRRC7	29.4	0.00545	0.164	6.35	6.35	5.81	0.915	ENSG00000033122	57554	leucine rich repeat containing 7 [Source:HGNC Symbol;Acc:HGNC:18531]
PDGFC	237	0.000632	0.0789	6.34	6.34	68	10.7	ENSG00000145431	56034	platelet derived growth factor C [Source:HGNC Symbol;Acc:HGNC:8801]
OLFML1	9.07	0.0156	0.237	6.28	6.28	1.25	0.2	ENSG00000183801	283298	olfactomedin like 1 [Source:HGNC Symbol;Acc:HGNC:24473]
SEMA3C	232	0.000468	0.0715	6.28	6.28	35.6	5.67	ENSG00000075223	10512	semaphorin 3C [Source:HGNC Symbol;Acc:HGNC:10725]
LINC02249	2.67	0.0067	0.177	6.27	6.27	0.538	0.0859	ENSG00000225930	NA	long intergenic non-protein coding RNA 2249 [Source:HGNC Symbol;Acc:HGNC:32351]
CAMK2B	8.75	0.00563	0.166	6.26	6.26	2	0.319	ENSG00000058404	816	calcium/calmodulin dependent protein kinase II beta [Source:HGNC Symbol;Acc:HGNC:1461]
LINC01679	3.32	0.00285	0.13	6.25	6.25	0.416	0.0665	ENSG00000237989	NA	long intergenic non-protein coding RNA 1679 [Source:HGNC Symbol;Acc:HGNC:52469]
VTN	15.3	0.00781	0.186	6.24	6.24	1.38	0.222	ENSG00000109072	7448	vitronectin [Source:HGNC Symbol;Acc:HGNC:12724]
GADD45G	31.2	0.012	0.217	6.2	6.2	5.68	0.917	ENSG00000130222	10912	growth arrest and DNA damage inducible gamma [Source:HGNC Symbol;Acc:HGNC:4097]
LGSN	2.71	0.00549	0.164	6.19	6.19	0.944	0.152	ENSG00000146166	51557	lengsin, lens protein with glutamine synthetase domain [Source:HGNC Symbol;Acc:HGNC:21016]
EBF3	201	0.00273	0.128	6.18	6.18	13.7	2.22	ENSG00000108001	253738	EBF transcription factor 3 [Source:HGNC Symbol;Acc:HGNC:19087]
OTOGL	19.5	0.0018	0.11	6.18	6.18	4.92	0.796	ENSG00000165899	283310	otogelin like [Source:HGNC Symbol;Acc:HGNC:26901]
LUM	7.4	0.0236	0.278	6.13	6.13	2.19	0.357	ENSG00000139329	4060	lumican [Source:HGNC Symbol;Acc:HGNC:6724]
TMEM229A	11.6	0.00106	0.092	6.13	6.13	3.71	0.605	ENSG00000234224	730130	transmembrane protein 229A [Source:HGNC Symbol;Acc:HGNC:37279]
MKRN3	6.44	0.0113	0.212	6.12	6.12	1.56	0.255	ENSG00000179455	7681	makorin ring finger protein 3 [Source:HGNC Symbol;Acc:HGNC:7114]
ANKRD22	1.49	0.0283	0.298	6.11	6.11	0.457	0.0749	ENSG00000152766	118932	ankyrin repeat domain 22 [Source:HGNC Symbol;Acc:HGNC:28321]
CNTN4	14.5	0.000819	0.0852	6.11	6.11	1.4	0.23	ENSG00000144619	152330	contactin 4 [Source:HGNC Symbol;Acc:HGNC:2174]
SCRT2	21	0.00776	0.186	6.11	6.11	1.41	0.23	ENSG00000215397	85508	scratch family transcriptional repressor 2 [Source:HGNC Symbol;Acc:HGNC:15952]
TGFB1I1	2.87	0.00244	0.124	6.11	6.11	0.695	0.114	ENSG00000140682	7041	transforming growth factor beta 1 induced transcript 1 [Source:HGNC Symbol;Acc:HGNC:11767]
HMGCS2	7.14	0.0137	0.227	6.1	6.1	2.93	0.48	ENSG00000134240	3158	3-hydroxy-3-methylglutaryl-CoA synthase 2 [Source:HGNC Symbol;Acc:HGNC:5008]
SAMD4A	24.8	0.00116	0.0956	6.08	6.08	7.6	1.25	ENSG00000020577	23034	sterile alpha motif domain containing 4A [Source:HGNC Symbol;Acc:HGNC:23023]
KCND3	41.7	0.0076	0.184	6.06	6.06	13	2.14	ENSG00000171385	3752	potassium voltage-gated channel subfamily D member 3 [Source:HGNC Symbol;Acc:HGNC:6239]
NHLH1	563	0.00475	0.157	6.06	6.06	32.4	5.34	ENSG00000171786	4807	nescient helix-loop-helix 1 [Source:HGNC Symbol;Acc:HGNC:7817]
RGS4	33.7	8.33e-05	0.0521	6.05	6.05	6.46	1.07	ENSG00000117152	5999	regulator of G protein signaling 4 [Source:HGNC Symbol;Acc:HGNC:10000]
CA3	42.5	0.0171	0.247	6.03	6.03	14.1	2.33	ENSG00000164879	761	carbonic anhydrase 3 [Source:HGNC Symbol;Acc:HGNC:1374]
HCAR1	2.51	0.0334	0.317	5.97	5.97	0.96	0.161	ENSG00000196917	27198	hydroxycarboxylic acid receptor 1 [Source:HGNC Symbol;Acc:HGNC:4532]
SLIT2	297	0.00454	0.155	5.97	5.97	58.9	9.87	ENSG00000145147	9353	slit guidance ligand 2 [Source:HGNC Symbol;Acc:HGNC:11086]
TINAGL1	15.9	0.0152	0.235	5.97	5.97	4.75	0.795	ENSG00000142910	64129	tubulointerstitial nephritis antigen like 1 [Source:HGNC Symbol;Acc:HGNC:19168]
ARHGDIB	10.2	0.00831	0.189	5.95	5.95	3.48	0.585	ENSG00000111348	397	Rho GDP dissociation inhibitor beta [Source:HGNC Symbol;Acc:HGNC:679]
SLC46A1	48.3	3.61e-05	0.0502	5.94	5.94	11.5	1.93	ENSG00000076351	113235	solute carrier family 46 member 1 [Source:HGNC Symbol;Acc:HGNC:30521]
TBC1D3H	2.8	0.035	0.324	5.93	5.93	0.28	0.0472	ENSG00000274226	729877	TBC1 domain family member 3H [Source:HGNC Symbol;Acc:HGNC:30708]
TBC1D3H	2.8	0.035	0.324	5.93	5.93	0.28	0.0472	ENSG00000277974	729877	TBC1 domain family member 3H [Source:HGNC Symbol;Acc:HGNC:30708]
CDH12	1.99	0.019	0.259	5.9	5.9	0.621	0.105	ENSG00000154162	1010	cadherin 12 [Source:HGNC Symbol;Acc:HGNC:1751]
ADGRA2	93.7	0.0156	0.237	5.89	5.89	25.1	4.26	ENSG00000020181	25960	adhesion G protein-coupled receptor A2 [Source:HGNC Symbol;Acc:HGNC:17849]
MGLL	41	0.00259	0.126	5.89	5.89	4.13	0.701	ENSG00000074416	11343	monoglyceride lipase [Source:HGNC Symbol;Acc:HGNC:17038]
DCX	517	4.24e-06	0.0283	5.87	5.87	55.7	9.5	ENSG00000077279	1641	doublecortin [Source:HGNC Symbol;Acc:HGNC:2714]
NTS	2.06	0.0438	0.345	5.85	5.85	0.729	0.125	ENSG00000133636	4922	neurotensin [Source:HGNC Symbol;Acc:HGNC:8038]
TRPV6	21.4	0.0087	0.193	5.85	5.85	5.8	0.992	ENSG00000276971	55503	transient receptor potential cation channel subfamily V member 6 [Source:HGNC Symbol;Acc:HGNC:14006]
TRPV6	21.4	0.0087	0.193	5.85	5.85	5.8	0.992	ENSG00000165125	55503	transient receptor potential cation channel subfamily V member 6 [Source:HGNC Symbol;Acc:HGNC:14006]
LMOD1	95.3	0.000456	0.0715	5.83	5.83	24.6	4.22	ENSG00000163431	25802	leiomodin 1 [Source:HGNC Symbol;Acc:HGNC:6647]
NNMT	4.75	0.00273	0.128	5.77	5.77	0.992	0.172	ENSG00000166741	4837	nicotinamide N-methyltransferase [Source:HGNC Symbol;Acc:HGNC:7861]
CLDN2	7.13	0.00874	0.193	5.76	5.76	1.93	0.335	ENSG00000165376	9075	claudin 2 [Source:HGNC Symbol;Acc:HGNC:2041]
LAPTM5	21.1	0.00177	0.11	5.74	5.74	1.48	0.258	ENSG00000162511	7805	lysosomal protein transmembrane 5 [Source:HGNC Symbol;Acc:HGNC:29612]
PDE1A	9.12	0.00583	0.168	5.74	5.74	2.37	0.413	ENSG00000115252	5136	phosphodiesterase 1A [Source:HGNC Symbol;Acc:HGNC:8774]
IL1RAPL2	1.64	0.0155	0.237	5.72	5.72	0.539	0.0943	ENSG00000189108	26280	interleukin 1 receptor accessory protein like 2 [Source:HGNC Symbol;Acc:HGNC:5997]
ISLR2	75	0.013	0.222	5.71	5.71	15	2.63	ENSG00000167178	57611	immunoglobulin superfamily containing leucine rich repeat 2 [Source:HGNC Symbol;Acc:HGNC:29286]
SCG2	19.1	0.00112	0.0945	5.71	5.71	1.47	0.258	ENSG00000171951	7857	secretogranin II [Source:HGNC Symbol;Acc:HGNC:10575]
UNC13C	2.35	0.00778	0.186	5.68	5.68	0.851	0.15	ENSG00000137766	440279	unc-13 homolog C [Source:HGNC Symbol;Acc:HGNC:23149]
KCNMB1	3.93	0.016	0.24	5.67	5.67	1.18	0.208	ENSG00000145936	3779	potassium calcium-activated channel subfamily M regulatory beta subunit 1 [Source:HGNC Symbol;Acc:HGNC:6285]
LINC00886	2.67	0.00855	0.19	5.66	5.66	0.848	0.15	ENSG00000240875	NA	long intergenic non-protein coding RNA 886 [Source:HGNC Symbol;Acc:HGNC:48572]
MYO16	23.2	0.000994	0.0896	5.66	5.66	2.53	0.446	ENSG00000041515	23026	myosin XVI [Source:HGNC Symbol;Acc:HGNC:29822]
EPHA6	23.7	0.00406	0.149	5.65	5.65	5.43	0.961	ENSG00000080224	285220	EPH receptor A6 [Source:HGNC Symbol;Acc:HGNC:19296]
LIPC	23.8	0.00674	0.178	5.65	5.65	0.423	0.0749	ENSG00000166035	3990	lipase C, hepatic type [Source:HGNC Symbol;Acc:HGNC:6619]
GALNT15	2.24	0.00981	0.202	5.62	5.62	0.483	0.0859	ENSG00000131386	117248	polypeptide N-acetylgalactosaminyltransferase 15 [Source:HGNC Symbol;Acc:HGNC:21531]
TBX3	144	0.00138	0.101	5.62	5.62	20.8	3.7	ENSG00000135111	6926	T-box transcription factor 3 [Source:HGNC Symbol;Acc:HGNC:11602]
FAM224B	3.37	0.00815	0.189	5.6	5.6	0.448	0.08	ENSG00000230663	NA	family with sequence similarity 224 member B [Source:HGNC Symbol;Acc:HGNC:37737]
AFF3	64.4	0.000669	0.0792	5.59	5.59	9.26	1.66	ENSG00000144218	3899	AF4/FMR2 family member 3 [Source:HGNC Symbol;Acc:HGNC:6473]
THRIL	1.64	0.0483	0.362	5.57	5.57	0.448	0.0803	ENSG00000280634	NA	TNF and HNRNPL related immunoregulatory long non-coding RNA [Source:HGNC Symbol;Acc:HGNC:49503]
ADRA1D	5.43	0.005	0.157	5.55	5.55	1.89	0.341	ENSG00000171873	146	adrenoceptor alpha 1D [Source:HGNC Symbol;Acc:HGNC:280]
LY6H	11.2	0.00177	0.11	5.55	5.55	1.43	0.258	ENSG00000176956	4062	lymphocyte antigen 6 family member H [Source:HGNC Symbol;Acc:HGNC:6728]
LY6H	11.2	0.00177	0.11	5.55	5.55	1.43	0.258	ENSG00000274488	4062	lymphocyte antigen 6 family member H [Source:HGNC Symbol;Acc:HGNC:6728]
ONECUT2	156	0.000207	0.0594	5.55	5.55	17.4	3.14	ENSG00000119547	9480	one cut homeobox 2 [Source:HGNC Symbol;Acc:HGNC:8139]
N4BP2L1	10.9	0.00206	0.116	5.54	5.54	3.35	0.605	ENSG00000139597	90634	NEDD4 binding protein 2 like 1 [Source:HGNC Symbol;Acc:HGNC:25037]
GRIN3A	7.06	0.0109	0.209	5.53	5.53	1.27	0.23	ENSG00000198785	116443	glutamate ionotropic receptor NMDA type subunit 3A [Source:HGNC Symbol;Acc:HGNC:16767]
CDC20B	6.5	0.049	0.364	5.52	5.52	2.29	0.415	ENSG00000164287	166979	cell division cycle 20B [Source:HGNC Symbol;Acc:HGNC:24222]
TIE1	7.8	0.0295	0.302	5.48	5.48	1.63	0.297	ENSG00000066056	7075	tyrosine kinase with immunoglobulin like and EGF like domains 1 [Source:HGNC Symbol;Acc:HGNC:11809]
IRX3	191	0.00762	0.184	5.47	5.47	69.2	12.7	ENSG00000177508	79191	iroquois homeobox 3 [Source:HGNC Symbol;Acc:HGNC:14360]
FBLN5	6.2	0.00134	0.101	5.46	5.46	1.76	0.322	ENSG00000140092	10516	fibulin 5 [Source:HGNC Symbol;Acc:HGNC:3602]
F5	3.6	0.0241	0.28	5.45	5.45	1.03	0.189	ENSG00000198734	2153	coagulation factor V [Source:HGNC Symbol;Acc:HGNC:3542]
L1CAM	359	0.000293	0.0616	5.45	5.45	31.2	5.73	ENSG00000198910	3897	L1 cell adhesion molecule [Source:HGNC Symbol;Acc:HGNC:6470]
RBMS3	26.7	0.00104	0.0917	5.45	5.45	3.99	0.732	ENSG00000144642	27303	RNA binding motif single stranded interacting protein 3 [Source:HGNC Symbol;Acc:HGNC:13427]
SH2D3C	20.8	0.00692	0.179	5.45	5.45	4.1	0.752	ENSG00000095370	10044	SH2 domain containing 3C [Source:HGNC Symbol;Acc:HGNC:16884]
BTG3-AS1	10.8	0.000614	0.0789	5.44	5.44	2.33	0.428	ENSG00000281317	NA	BTG3 antisense RNA 1 [Source:HGNC Symbol;Acc:HGNC:53145]
BTG3-AS1	10.8	0.000614	0.0789	5.44	5.44	2.33	0.428	ENSG00000280594	NA	BTG3 antisense RNA 1 [Source:HGNC Symbol;Acc:HGNC:53145]
PHACTR3	19.8	0.00152	0.107	5.44	5.44	3.02	0.555	ENSG00000087495	116154	phosphatase and actin regulator 3 [Source:HGNC Symbol;Acc:HGNC:15833]
ITGB6	20.2	0.0349	0.324	5.43	5.43	7.49	1.38	ENSG00000115221	3694	integrin subunit beta 6 [Source:HGNC Symbol;Acc:HGNC:6161]
ELAVL4	412	0.00661	0.177	5.4	5.4	16.6	3.08	ENSG00000162374	1996	ELAV like RNA binding protein 4 [Source:HGNC Symbol;Acc:HGNC:3315]
HNMT	36.9	0.00175	0.11	5.39	5.39	8.02	1.49	ENSG00000150540	3176	histamine N-methyltransferase [Source:HGNC Symbol;Acc:HGNC:5028]
PRRX1	63.3	0.0293	0.302	5.38	5.38	23.1	4.28	ENSG00000116132	5396	paired related homeobox 1 [Source:HGNC Symbol;Acc:HGNC:9142]
LBX2	2.29	0.0134	0.225	5.37	5.37	0.669	0.125	ENSG00000179528	85474	ladybird homeobox 2 [Source:HGNC Symbol;Acc:HGNC:15525]
DNER	60.5	0.00396	0.148	5.36	5.36	14.3	2.67	ENSG00000187957	92737	delta/notch like EGF repeat containing [Source:HGNC Symbol;Acc:HGNC:24456]
ATOH8	56.1	0.00154	0.107	5.35	5.35	10.9	2.04	ENSG00000168874	84913	atonal bHLH transcription factor 8 [Source:HGNC Symbol;Acc:HGNC:24126]
CFAP221	9.46	0.00763	0.184	5.34	5.34	2.35	0.441	ENSG00000163075	200373	cilia and flagella associated protein 221 [Source:HGNC Symbol;Acc:HGNC:33720]
HEY1	135	0.00166	0.109	5.33	5.33	34.8	6.54	ENSG00000164683	23462	hes related family bHLH transcription factor with YRPW motif 1 [Source:HGNC Symbol;Acc:HGNC:4880]
SVOP	14.6	0.00464	0.156	5.33	5.33	1.06	0.2	ENSG00000166111	55530	SV2 related protein [Source:HGNC Symbol;Acc:HGNC:25417]
DACT3	41.2	0.0166	0.243	5.29	5.29	11.6	2.2	ENSG00000197380	147906	dishevelled binding antagonist of beta catenin 3 [Source:HGNC Symbol;Acc:HGNC:30745]
MSTN	68.3	0.0132	0.224	5.29	5.29	8.5	1.61	ENSG00000138379	2660	myostatin [Source:HGNC Symbol;Acc:HGNC:4223]
PAK6	54.5	0.00693	0.179	5.29	5.29	19.7	3.73	ENSG00000137843	56924	p21 (RAC1) activated kinase 6 [Source:HGNC Symbol;Acc:HGNC:16061]
PAK6	54.5	0.00693	0.179	5.29	5.29	19.7	3.73	ENSG00000137843	106821730	p21 (RAC1) activated kinase 6 [Source:HGNC Symbol;Acc:HGNC:16061]
CHRNB3	1.9	0.00812	0.189	5.28	5.28	0.249	0.0472	ENSG00000147432	1142	cholinergic receptor nicotinic beta 3 subunit [Source:HGNC Symbol;Acc:HGNC:1963]
S100A6	39.8	4.91e-05	0.0502	5.28	5.28	8.59	1.63	ENSG00000197956	6277	S100 calcium binding protein A6 [Source:HGNC Symbol;Acc:HGNC:10496]
DRD2	35.4	0.000619	0.0789	5.27	5.27	6.32	1.2	ENSG00000149295	1813	dopamine receptor D2 [Source:HGNC Symbol;Acc:HGNC:3023]
TRHDE	122	0.000181	0.0594	5.24	5.24	7.16	1.36	ENSG00000072657	29953	thyrotropin releasing hormone degrading enzyme [Source:HGNC Symbol;Acc:HGNC:30748]
ERICH3	20.4	0.00623	0.172	5.22	5.22	0.84	0.161	ENSG00000178965	127254	glutamate rich 3 [Source:HGNC Symbol;Acc:HGNC:25346]
LDB3	17.8	0.00161	0.109	5.21	5.21	1.78	0.341	ENSG00000122367	11155	LIM domain binding 3 [Source:HGNC Symbol;Acc:HGNC:15710]
CLSTN2	193	0.0189	0.258	5.19	5.19	59.4	11.5	ENSG00000158258	64084	calsyntenin 2 [Source:HGNC Symbol;Acc:HGNC:17448]
LRP1B	10.1	0.0111	0.211	5.17	5.17	3.47	0.671	ENSG00000168702	53353	LDL receptor related protein 1B [Source:HGNC Symbol;Acc:HGNC:6693]
ENDOU	2.77	0.0129	0.222	5.16	5.16	0.773	0.15	ENSG00000111405	8909	endonuclease, poly(U) specific [Source:HGNC Symbol;Acc:HGNC:14369]
UNCX	9.69	0.0229	0.275	5.16	5.16	2.64	0.512	ENSG00000164853	340260	UNC homeobox [Source:HGNC Symbol;Acc:HGNC:33194]
PTPRE	10	0.00313	0.135	5.14	5.14	2.25	0.438	ENSG00000132334	5791	protein tyrosine phosphatase receptor type E [Source:HGNC Symbol;Acc:HGNC:9669]
S100A14	33	0.0243	0.281	5.14	5.14	12.4	2.42	ENSG00000189334	57402	S100 calcium binding protein A14 [Source:HGNC Symbol;Acc:HGNC:18901]
CCNO	3.84	0.00822	0.189	5.1	5.1	1.31	0.258	ENSG00000152669	10309	cyclin O [Source:HGNC Symbol;Acc:HGNC:18576]
SST	171	0.0113	0.212	5.09	5.09	5.9	1.16	ENSG00000157005	6750	somatostatin [Source:HGNC Symbol;Acc:HGNC:11329]
ANKFN1	15.8	0.00545	0.164	5.08	5.08	0.676	0.133	ENSG00000153930	162282	ankyrin repeat and fibronectin type III domain containing 1 [Source:HGNC Symbol;Acc:HGNC:26766]
PTGER3	12.4	0.0182	0.255	5.08	5.08	1.68	0.33	ENSG00000050628	5733	prostaglandin E receptor 3 [Source:HGNC Symbol;Acc:HGNC:9595]
ALOX15	9.23	0.00174	0.11	5.07	5.07	2.57	0.508	ENSG00000161905	246	arachidonate 15-lipoxygenase [Source:HGNC Symbol;Acc:HGNC:433]
FOXJ1	35.7	0.00409	0.149	5.06	5.06	6.97	1.38	ENSG00000129654	2302	forkhead box J1 [Source:HGNC Symbol;Acc:HGNC:3816]
UNC5C	305	1.08e-05	0.0359	5.05	5.05	49	9.7	ENSG00000182168	8633	unc-5 netrin receptor C [Source:HGNC Symbol;Acc:HGNC:12569]
FOXD2-AS1	22.7	0.00195	0.112	5.04	5.04	2.24	0.444	ENSG00000237424	NA	FOXD2 adjacent opposite strand RNA 1 [Source:HGNC Symbol;Acc:HGNC:44256]
TCIM	8.64	0.0184	0.256	5.04	5.04	1.63	0.324	ENSG00000176907	56892	transcriptional and immune response regulator [Source:HGNC Symbol;Acc:HGNC:1357]
TMSB4XP8	2.99	0.0105	0.207	5.03	5.03	0.521	0.104	ENSG00000187653	NA	TMSB4X pseudogene 8 [Source:HGNC Symbol;Acc:HGNC:11885]
ABCC9	4.27	0.0205	0.266	4.98	4.98	0.621	0.125	ENSG00000069431	10060	ATP binding cassette subfamily C member 9 [Source:HGNC Symbol;Acc:HGNC:60]
CHCHD2P6	3.22	0.0103	0.205	4.98	4.98	0.373	0.0749	ENSG00000235084	NA	coiled-coil-helix-coiled-coil-helix domain containing 2 pseudogene 6 [Source:HGNC Symbol;Acc:HGNC:39590]
PDE7B	2.6	0.00679	0.178	4.92	4.92	0.792	0.161	ENSG00000171408	27115	phosphodiesterase 7B [Source:HGNC Symbol;Acc:HGNC:8792]
CAV2	1.54	0.0272	0.294	4.91	4.91	0.517	0.105	ENSG00000105971	858	caveolin 2 [Source:HGNC Symbol;Acc:HGNC:1528]
MPP1	12.5	0.0019	0.111	4.91	4.91	3.47	0.707	ENSG00000130830	4354	membrane palmitoylated protein 1 [Source:HGNC Symbol;Acc:HGNC:7219]
NR4A2	4.47	0.00262	0.127	4.91	4.91	1.02	0.208	ENSG00000153234	4929	nuclear receptor subfamily 4 group A member 2 [Source:HGNC Symbol;Acc:HGNC:7981]
SGCD	8.05	0.012	0.217	4.91	4.91	2.31	0.472	ENSG00000170624	6444	sarcoglycan delta [Source:HGNC Symbol;Acc:HGNC:10807]
SFXN3	6.68	0.0017	0.109	4.9	4.9	1.58	0.322	ENSG00000107819	81855	sideroflexin 3 [Source:HGNC Symbol;Acc:HGNC:16087]
WNT3A	39.5	0.000634	0.0789	4.9	4.9	5.23	1.07	ENSG00000154342	89780	Wnt family member 3A [Source:HGNC Symbol;Acc:HGNC:15983]
ABCA8	1.44	0.0422	0.341	4.88	4.88	0.23	0.0472	ENSG00000141338	10351	ATP binding cassette subfamily A member 8 [Source:HGNC Symbol;Acc:HGNC:38]
NXPH1	19	0.00238	0.123	4.88	4.88	1.01	0.208	ENSG00000122584	30010	neurexophilin 1 [Source:HGNC Symbol;Acc:HGNC:20693]
IL10RA	4.11	0.0133	0.224	4.87	4.87	0.795	0.163	ENSG00000110324	3587	interleukin 10 receptor subunit alpha [Source:HGNC Symbol;Acc:HGNC:5964]
CACNG6	8.98	0.00229	0.121	4.86	4.86	2.43	0.499	ENSG00000130433	59285	calcium voltage-gated channel auxiliary subunit gamma 6 [Source:HGNC Symbol;Acc:HGNC:13625]
LHX1	10	0.0239	0.279	4.84	4.84	3.12	0.644	ENSG00000274577	3975	LIM homeobox 1 [Source:HGNC Symbol;Acc:HGNC:6593]
LHX1	10	0.0239	0.279	4.84	4.84	3.12	0.644	ENSG00000273706	3975	LIM homeobox 1 [Source:HGNC Symbol;Acc:HGNC:6593]
RAI2	56.9	0.00998	0.202	4.84	4.84	19.5	4.03	ENSG00000131831	10742	retinoic acid induced 2 [Source:HGNC Symbol;Acc:HGNC:9835]
ABCA12	9.89	0.0184	0.256	4.81	4.81	2.9	0.604	ENSG00000144452	26154	ATP binding cassette subfamily A member 12 [Source:HGNC Symbol;Acc:HGNC:14637]
RNASE4	5.07	0.00693	0.179	4.81	4.81	1.18	0.246	ENSG00000258818	6038	ribonuclease A family member 4 [Source:HGNC Symbol;Acc:HGNC:10047]
S100A16	223	0.00702	0.18	4.81	4.81	78.9	16.4	ENSG00000188643	140576	S100 calcium binding protein A16 [Source:HGNC Symbol;Acc:HGNC:20441]
GGT5	1.94	0.0149	0.235	4.8	4.8	0.227	0.0472	ENSG00000099998	2687	gamma-glutamyltransferase 5 [Source:HGNC Symbol;Acc:HGNC:4260]
KRT80	2.94	0.0324	0.313	4.8	4.8	0.959	0.2	ENSG00000167767	144501	keratin 80 [Source:HGNC Symbol;Acc:HGNC:27056]
SOX6	155	0.00437	0.154	4.8	4.8	44.6	9.28	ENSG00000110693	55553	SRY-box transcription factor 6 [Source:HGNC Symbol;Acc:HGNC:16421]
NRN1	122	0.000464	0.0715	4.79	4.79	8.14	1.7	ENSG00000124785	51299	neuritin 1 [Source:HGNC Symbol;Acc:HGNC:17972]
FADS6	4.67	0.00529	0.162	4.77	4.77	1.23	0.258	ENSG00000172782	283985	fatty acid desaturase 6 [Source:HGNC Symbol;Acc:HGNC:30459]
LZTS1	146	0.00372	0.144	4.77	4.77	18.6	3.9	ENSG00000061337	11178	leucine zipper tumor suppressor 1 [Source:HGNC Symbol;Acc:HGNC:13861]
CSF3R	2.38	0.0184	0.256	4.73	4.73	0.446	0.0943	ENSG00000119535	1441	colony stimulating factor 3 receptor [Source:HGNC Symbol;Acc:HGNC:2439]
ZDHHC8P1	33.1	0.0036	0.144	4.71	4.71	7.2	1.53	ENSG00000133519	NA	ZDHHC8 pseudogene 1 [Source:HGNC Symbol;Acc:HGNC:26461]
ZDHHC8P1	33.1	0.0036	0.144	4.71	4.71	7.2	1.53	ENSG00000281076	NA	ZDHHC8 pseudogene 1 [Source:HGNC Symbol;Acc:HGNC:26461]
ABCB4	36.1	0.00833	0.189	4.69	4.69	7.85	1.68	ENSG00000005471	5244	ATP binding cassette subfamily B member 4 [Source:HGNC Symbol;Acc:HGNC:45]
PTPRH	2.2	0.0147	0.234	4.69	4.69	0.312	0.0665	ENSG00000080031	5794	protein tyrosine phosphatase receptor type H [Source:HGNC Symbol;Acc:HGNC:9672]
XKR7	308	0.00401	0.148	4.65	4.65	31.5	6.78	ENSG00000260903	343702	XK related 7 [Source:HGNC Symbol;Acc:HGNC:23062]
AMER3	6.93	0.0129	0.222	4.64	4.64	0.785	0.169	ENSG00000178171	205147	APC membrane recruitment protein 3 [Source:HGNC Symbol;Acc:HGNC:26771]
ASCL1	10.4	0.00989	0.202	4.64	4.64	1.07	0.23	ENSG00000139352	429	achaete-scute family bHLH transcription factor 1 [Source:HGNC Symbol;Acc:HGNC:738]
CXCL14	134	0.0451	0.349	4.64	4.64	46.3	9.98	ENSG00000145824	9547	C-X-C motif chemokine ligand 14 [Source:HGNC Symbol;Acc:HGNC:10640]
SYNPO	39.8	0.00882	0.194	4.64	4.64	12.7	2.75	ENSG00000171992	11346	synaptopodin [Source:HGNC Symbol;Acc:HGNC:30672]
AMOT	272	0.000298	0.0616	4.62	4.62	51.3	11.1	ENSG00000126016	154796	angiomotin [Source:HGNC Symbol;Acc:HGNC:17810]
NECTIN4	56.1	0.00598	0.17	4.62	4.62	15.9	3.44	ENSG00000143217	81607	nectin cell adhesion molecule 4 [Source:HGNC Symbol;Acc:HGNC:19688]
PSD4	39.9	0.00213	0.118	4.62	4.62	12.4	2.69	ENSG00000125637	23550	pleckstrin and Sec7 domain containing 4 [Source:HGNC Symbol;Acc:HGNC:19096]
KCNB2	12.1	0.0287	0.3	4.61	4.61	1.44	0.313	ENSG00000182674	9312	potassium voltage-gated channel subfamily B member 2 [Source:HGNC Symbol;Acc:HGNC:6232]
SYP	85	0.00244	0.124	4.61	4.61	10.9	2.36	ENSG00000102003	6855	synaptophysin [Source:HGNC Symbol;Acc:HGNC:11506]
HID1	158	0.00443	0.154	4.6	4.6	19.8	4.3	ENSG00000167861	283987	HID1 domain containing [Source:HGNC Symbol;Acc:HGNC:15736]
ESPNL	4.9	0.00461	0.156	4.59	4.59	0.777	0.169	ENSG00000144488	339768	espin like [Source:HGNC Symbol;Acc:HGNC:27937]
SAMD5	37.5	0.000899	0.0877	4.59	4.59	4.68	1.02	ENSG00000203727	389432	sterile alpha motif domain containing 5 [Source:HGNC Symbol;Acc:HGNC:21180]
LINC00456	2.7	0.0194	0.26	4.58	4.58	0.787	0.172	ENSG00000233124	NA	long intergenic non-protein coding RNA 456 [Source:HGNC Symbol;Acc:HGNC:42804]
MAGEA11	1.18	0.0276	0.295	4.58	4.58	0.305	0.0665	ENSG00000185247	4110	MAGE family member A11 [Source:HGNC Symbol;Acc:HGNC:6798]
DPH6-DT	1.42	0.0407	0.339	4.57	4.57	0.431	0.0943	ENSG00000248079	NA	DPH6 divergent transcript [Source:HGNC Symbol;Acc:HGNC:44147]
SALRNA1	2.26	0.0389	0.335	4.57	4.57	0.216	0.0472	ENSG00000258952	NA	senescence associated long non-coding RNA 1 [Source:HGNC Symbol;Acc:HGNC:49001]
EFCAB5	2.95	0.0218	0.27	4.56	4.56	0.683	0.15	ENSG00000176927	374786	EF-hand calcium binding domain 5 [Source:HGNC Symbol;Acc:HGNC:24801]
HS3ST1	3.4	0.0238	0.279	4.55	4.55	1.19	0.26	ENSG00000002587	9957	heparan sulfate-glucosamine 3-sulfotransferase 1 [Source:HGNC Symbol;Acc:HGNC:5194]
RFTN1	34.1	0.034	0.319	4.55	4.55	9.71	2.13	ENSG00000131378	23180	raftlin, lipid raft linker 1 [Source:HGNC Symbol;Acc:HGNC:30278]
CALCR	1.96	0.0159	0.239	4.54	4.54	0.39	0.0859	ENSG00000004948	799	calcitonin receptor [Source:HGNC Symbol;Acc:HGNC:1440]
CLIC5	10.3	0.0117	0.215	4.54	4.54	2.74	0.605	ENSG00000112782	53405	chloride intracellular channel 5 [Source:HGNC Symbol;Acc:HGNC:13517]
ITPR1	40.4	0.0124	0.22	4.54	4.54	11.3	2.48	ENSG00000150995	3708	inositol 1,4,5-trisphosphate receptor type 1 [Source:HGNC Symbol;Acc:HGNC:6180]
GAS2	21.3	0.0441	0.346	4.52	4.52	5.33	1.18	ENSG00000148935	2620	growth arrest specific 2 [Source:HGNC Symbol;Acc:HGNC:4167]
FAP	4.95	0.0297	0.303	4.51	4.51	1.09	0.241	ENSG00000078098	2191	fibroblast activation protein alpha [Source:HGNC Symbol;Acc:HGNC:3590]
KITLG	117	0.00292	0.131	4.51	4.51	27.2	6.03	ENSG00000049130	4254	KIT ligand [Source:HGNC Symbol;Acc:HGNC:6343]
CFAP206	7.22	0.00369	0.144	4.5	4.5	1.87	0.415	ENSG00000272514	154313	cilia and flagella associated protein 206 [Source:HGNC Symbol;Acc:HGNC:21405]
PLA2G4A	17.1	0.00152	0.107	4.5	4.5	4.64	1.03	ENSG00000116711	5321	phospholipase A2 group IVA [Source:HGNC Symbol;Acc:HGNC:9035]
TAGLN3	253	0.00575	0.167	4.5	4.5	21.1	4.68	ENSG00000144834	29114	transgelin 3 [Source:HGNC Symbol;Acc:HGNC:29868]
GADL1	2.76	0.0203	0.265	4.49	4.49	0.821	0.183	ENSG00000144644	339896	glutamate decarboxylase like 1 [Source:HGNC Symbol;Acc:HGNC:27949]
MIR181A2HG	1.43	0.0255	0.286	4.47	4.47	0.297	0.0665	ENSG00000224020	NA	MIR181A2 host gene [Source:HGNC Symbol;Acc:HGNC:37188]
SHC3	34.9	0.037	0.328	4.47	4.47	6.44	1.44	ENSG00000148082	53358	SHC adaptor protein 3 [Source:HGNC Symbol;Acc:HGNC:18181]
CFAP57	16.6	0.00102	0.091	4.46	4.46	2.41	0.541	ENSG00000243710	149465	cilia and flagella associated protein 57 [Source:HGNC Symbol;Acc:HGNC:26485]
LGI4	71.5	0.000426	0.0715	4.46	4.46	10.8	2.41	ENSG00000153902	163175	leucine rich repeat LGI family member 4 [Source:HGNC Symbol;Acc:HGNC:18712]
TMEM176A	2.97	0.0327	0.314	4.46	4.46	0.755	0.169	ENSG00000002933	55365	transmembrane protein 176A [Source:HGNC Symbol;Acc:HGNC:24930]
DOK7	1.57	0.0135	0.226	4.45	4.45	0.42	0.0943	ENSG00000175920	285489	docking protein 7 [Source:HGNC Symbol;Acc:HGNC:26594]
RASD1	58.9	0.000795	0.0844	4.45	4.45	7.52	1.69	ENSG00000108551	51655	ras related dexamethasone induced 1 [Source:HGNC Symbol;Acc:HGNC:15828]
NABP1	70.9	0.00332	0.138	4.44	4.44	17.6	3.97	ENSG00000173559	64859	nucleic acid binding protein 1 [Source:HGNC Symbol;Acc:HGNC:26232]
PDE4D	33.1	0.000713	0.0806	4.44	4.44	8.71	1.96	ENSG00000113448	5144	phosphodiesterase 4D [Source:HGNC Symbol;Acc:HGNC:8783]
SLC40A1	21.7	0.00615	0.171	4.44	4.44	6.06	1.37	ENSG00000138449	30061	solute carrier family 40 member 1 [Source:HGNC Symbol;Acc:HGNC:10909]
KLHL32	7.2	0.014	0.229	4.43	4.43	1.54	0.346	ENSG00000186231	114792	kelch like family member 32 [Source:HGNC Symbol;Acc:HGNC:21221]
LINC00893	2.16	0.0234	0.277	4.43	4.43	0.425	0.0959	ENSG00000241769	NA	long intergenic non-protein coding RNA 893 [Source:HGNC Symbol;Acc:HGNC:44265]
MYCBP2-AS1	1.88	0.00921	0.198	4.42	4.42	0.462	0.104	ENSG00000236051	NA	MYCBP2 antisense RNA 1 [Source:HGNC Symbol;Acc:HGNC:41023]
LINC01551	2.47	0.0444	0.347	4.4	4.4	0.952	0.216	ENSG00000186960	NA	long intergenic non-protein coding RNA 1551 [Source:HGNC Symbol;Acc:HGNC:19828]
DLK2	19.7	0.0191	0.259	4.39	4.39	2.75	0.627	ENSG00000171462	65989	delta like non-canonical Notch ligand 2 [Source:HGNC Symbol;Acc:HGNC:21113]
MITF	11.7	0.0123	0.22	4.39	4.39	3.56	0.809	ENSG00000187098	4286	melanocyte inducing transcription factor [Source:HGNC Symbol;Acc:HGNC:7105]
CORIN	13.5	0.0139	0.228	4.38	4.38	0.546	0.125	ENSG00000145244	10699	corin, serine peptidase [Source:HGNC Symbol;Acc:HGNC:19012]
MAPK13	23.9	0.00722	0.183	4.38	4.38	7.09	1.62	ENSG00000156711	5603	mitogen-activated protein kinase 13 [Source:HGNC Symbol;Acc:HGNC:6875]
PDE4B	47.5	0.000459	0.0715	4.38	4.38	7.26	1.66	ENSG00000184588	5142	phosphodiesterase 4B [Source:HGNC Symbol;Acc:HGNC:8781]
ST6GALNAC2	8.14	0.00747	0.184	4.37	4.37	1.78	0.406	ENSG00000070731	10610	ST6 N-acetylgalactosaminide alpha-2,6-sialyltransferase 2 [Source:HGNC Symbol;Acc:HGNC:10867]
ASXL3	83.9	0.000141	0.0594	4.36	4.36	16.7	3.84	ENSG00000141431	80816	ASXL transcriptional regulator 3 [Source:HGNC Symbol;Acc:HGNC:29357]
TRHDE-AS1	82.1	0.00621	0.171	4.33	4.33	4.25	0.981	ENSG00000236333	NA	TRHDE antisense RNA 1 [Source:HGNC Symbol;Acc:HGNC:27471]
GPR17	3.22	0.027	0.293	4.3	4.3	0.453	0.105	ENSG00000144230	2840	G protein-coupled receptor 17 [Source:HGNC Symbol;Acc:HGNC:4471]
PGF	19.9	0.0304	0.306	4.3	4.3	3.14	0.73	ENSG00000119630	5228	placental growth factor [Source:HGNC Symbol;Acc:HGNC:8893]
MYOF	106	0.00956	0.2	4.29	4.29	26.6	6.19	ENSG00000138119	26509	myoferlin [Source:HGNC Symbol;Acc:HGNC:3656]
PCDH15	42.9	0.0174	0.249	4.28	4.28	1.58	0.369	ENSG00000150275	65217	protocadherin related 15 [Source:HGNC Symbol;Acc:HGNC:14674]
CNTF	2.94	0.027	0.293	4.27	4.27	0.699	0.163	ENSG00000242689	1270	ciliary neurotrophic factor [Source:HGNC Symbol;Acc:HGNC:2169]
HOXB2	19.2	0.00375	0.144	4.26	4.26	4.18	0.982	ENSG00000173917	3212	homeobox B2 [Source:HGNC Symbol;Acc:HGNC:5113]
ZFHX4-AS1	27.7	0.00285	0.13	4.26	4.26	6.92	1.62	ENSG00000253661	NA	ZFHX4 antisense RNA 1 [Source:HGNC Symbol;Acc:HGNC:44165]
FREM2	806	0.0162	0.241	4.23	4.23	268	63.2	ENSG00000150893	341640	FRAS1 related extracellular matrix 2 [Source:HGNC Symbol;Acc:HGNC:25396]
KCNN4	3.29	0.0237	0.278	4.22	4.22	0.948	0.225	ENSG00000104783	3783	potassium calcium-activated channel subfamily N member 4 [Source:HGNC Symbol;Acc:HGNC:6293]
PROM2	36.7	0.000965	0.0892	4.22	4.22	12.5	2.97	ENSG00000155066	150696	prominin 2 [Source:HGNC Symbol;Acc:HGNC:20685]
MYRIP	4.19	0.0182	0.255	4.21	4.21	1.25	0.297	ENSG00000170011	25924	myosin VIIA and Rab interacting protein [Source:HGNC Symbol;Acc:HGNC:19156]
MME	29.4	0.0138	0.228	4.2	4.2	5.17	1.23	ENSG00000196549	4311	membrane metalloendopeptidase [Source:HGNC Symbol;Acc:HGNC:7154]
CNOT6LP1	3.2	0.00919	0.198	4.19	4.19	0.733	0.175	ENSG00000230183	NA	CNOT6L pseudogene 1 [Source:HGNC Symbol;Acc:HGNC:32355]
DPYD	88.6	0.00573	0.167	4.19	4.19	9.92	2.37	ENSG00000188641	1806	dihydropyrimidine dehydrogenase [Source:HGNC Symbol;Acc:HGNC:3012]
NOD2	1.68	0.0272	0.293	4.19	4.19	0.36	0.0859	ENSG00000167207	64127	nucleotide binding oligomerization domain containing 2 [Source:HGNC Symbol;Acc:HGNC:5331]
TSHZ1	58.3	0.0038	0.145	4.19	4.19	12.2	2.91	ENSG00000179981	10194	teashirt zinc finger homeobox 1 [Source:HGNC Symbol;Acc:HGNC:10669]
INKA1	14.3	0.00698	0.18	4.18	4.18	2.92	0.698	ENSG00000185614	389119	inka box actin regulator 1 [Source:HGNC Symbol;Acc:HGNC:32480]
WNT2	1.79	0.0257	0.287	4.18	4.18	0.602	0.144	ENSG00000105989	7472	Wnt family member 2 [Source:HGNC Symbol;Acc:HGNC:12780]
CCSER1	19.9	0.00122	0.0976	4.16	4.16	2.82	0.676	ENSG00000184305	401145	coiled-coil serine rich protein 1 [Source:HGNC Symbol;Acc:HGNC:29349]
AQP3	33.7	0.0015	0.106	4.15	4.15	7.44	1.79	ENSG00000165272	360	aquaporin 3 (Gill blood group) [Source:HGNC Symbol;Acc:HGNC:636]
CNTN2	569	0.00133	0.101	4.15	4.15	61.4	14.8	ENSG00000184144	6900	contactin 2 [Source:HGNC Symbol;Acc:HGNC:2172]
MT1X	49.9	0.000446	0.0715	4.15	4.15	16.6	3.99	ENSG00000187193	4501	metallothionein 1X [Source:HGNC Symbol;Acc:HGNC:7405]
FAM78B	69.7	0.00149	0.106	4.14	4.14	4.75	1.15	ENSG00000188859	149297	family with sequence similarity 78 member B [Source:HGNC Symbol;Acc:HGNC:13495]
SH3GL3	46.9	0.0118	0.216	4.14	4.14	12	2.91	ENSG00000140600	6457	SH3 domain containing GRB2 like 3, endophilin A3 [Source:HGNC Symbol;Acc:HGNC:10832]
GPR87	6.41	0.0337	0.318	4.13	4.13	1.93	0.468	ENSG00000138271	53836	G protein-coupled receptor 87 [Source:HGNC Symbol;Acc:HGNC:4538]
HSPD1P6	81.9	0.00188	0.111	4.13	4.13	23.5	5.69	ENSG00000230067	NA	heat shock protein family D (Hsp60) member 1 pseudogene 6 [Source:HGNC Symbol;Acc:HGNC:5267]
SGIP1	11.9	0.0101	0.203	4.13	4.13	1.73	0.419	ENSG00000118473	84251	SH3GL interacting endocytic adaptor 1 [Source:HGNC Symbol;Acc:HGNC:25412]
SLC6A4	10.6	0.0351	0.324	4.13	4.13	2.83	0.684	ENSG00000108576	6532	solute carrier family 6 member 4 [Source:HGNC Symbol;Acc:HGNC:11050]
KLHL31	6.62	0.011	0.211	4.12	4.12	2.09	0.507	ENSG00000124743	401265	kelch like family member 31 [Source:HGNC Symbol;Acc:HGNC:21353]
GALNTL6	1.71	0.026	0.289	4.11	4.11	0.353	0.0859	ENSG00000174473	442117	polypeptide N-acetylgalactosaminyltransferase like 6 [Source:HGNC Symbol;Acc:HGNC:33844]
LINC01426	1.65	0.023	0.275	4.11	4.11	0.308	0.0749	ENSG00000234380	NA	long intergenic non-protein coding RNA 1426 [Source:HGNC Symbol;Acc:HGNC:50734]
MMRN2	8.37	0.035	0.324	4.11	4.11	1.49	0.362	ENSG00000173269	79812	multimerin 2 [Source:HGNC Symbol;Acc:HGNC:19888]
SLC16A7	24.3	0.00259	0.126	4.09	4.09	6.63	1.62	ENSG00000118596	9194	solute carrier family 16 member 7 [Source:HGNC Symbol;Acc:HGNC:10928]
GUCY1A2	23.8	0.00238	0.123	4.08	4.08	3.85	0.945	ENSG00000152402	2977	guanylate cyclase 1 soluble subunit alpha 2 [Source:HGNC Symbol;Acc:HGNC:4684]
SLC30A2	6.25	0.0251	0.285	4.08	4.08	1.61	0.393	ENSG00000158014	7780	solute carrier family 30 member 2 [Source:HGNC Symbol;Acc:HGNC:11013]
SH3TC1	1.68	0.0354	0.325	4.06	4.06	0.461	0.114	ENSG00000125089	54436	SH3 domain and tetratricopeptide repeats 1 [Source:HGNC Symbol;Acc:HGNC:26009]
HFE	5.72	0.0041	0.149	4.04	4.04	1.61	0.399	ENSG00000010704	3077	homeostatic iron regulator [Source:HGNC Symbol;Acc:HGNC:4886]
TPPP3	42	0.00807	0.189	4.04	4.04	5.44	1.34	ENSG00000159713	51673	tubulin polymerization promoting protein family member 3 [Source:HGNC Symbol;Acc:HGNC:24162]
C4orf19	17	0.00865	0.192	4.03	4.03	4.19	1.04	ENSG00000154274	55286	chromosome 4 open reading frame 19 [Source:HGNC Symbol;Acc:HGNC:25618]
LRRC73	3.36	0.0278	0.295	4.02	4.02	0.836	0.208	ENSG00000204052	221424	leucine rich repeat containing 73 [Source:HGNC Symbol;Acc:HGNC:21375]
TIFAB	1.74	0.0348	0.323	4.02	4.02	0.19	0.0472	ENSG00000255833	497189	TIFA inhibitor [Source:HGNC Symbol;Acc:HGNC:34024]
OR2A7	7.32	0.00753	0.184	4.01	4.01	2.03	0.507	ENSG00000243896	401427	olfactory receptor family 2 subfamily A member 7 [Source:HGNC Symbol;Acc:HGNC:8234]
SPAG17	7.98	0.0163	0.242	4.01	4.01	1.75	0.436	ENSG00000155761	200162	sperm associated antigen 17 [Source:HGNC Symbol;Acc:HGNC:26620]
TNRC6C-AS1	28.7	0.00846	0.19	4.01	4.01	5.68	1.42	ENSG00000204282	NA	TNRC6C antisense RNA 1 [Source:HGNC Symbol;Acc:HGNC:44360]
KCNJ5	14	0.0381	0.332	4	4	4.21	1.05	ENSG00000120457	3762	potassium inwardly rectifying channel subfamily J member 5 [Source:HGNC Symbol;Acc:HGNC:6266]
PRDX2P4	2.28	0.0127	0.222	4	4	0.609	0.152	ENSG00000213177	NA	peroxiredoxin 2 pseudogene 4 [Source:HGNC Symbol;Acc:HGNC:44969]
HPD	1.43	0.0373	0.329	3.99	3.99	0.487	0.122	ENSG00000158104	3242	4-hydroxyphenylpyruvate dioxygenase [Source:HGNC Symbol;Acc:HGNC:5147]
F13A1	81.7	0.00135	0.101	3.98	3.98	3.59	0.902	ENSG00000124491	2162	coagulation factor XIII A chain [Source:HGNC Symbol;Acc:HGNC:3531]
LRRC77P	5.56	0.0249	0.284	3.98	3.98	0.65	0.163	ENSG00000244227	NA	leucine rich repeat containing 77, pseudogene [Source:HGNC Symbol;Acc:HGNC:50536]
EPHA3	51.5	0.000728	0.0812	3.97	3.97	5.07	1.28	ENSG00000044524	2042	EPH receptor A3 [Source:HGNC Symbol;Acc:HGNC:3387]
FOXD4	3	0.0345	0.322	3.97	3.97	0.638	0.161	ENSG00000170122	2298	forkhead box D4 [Source:HGNC Symbol;Acc:HGNC:3805]
PCDH9	51.7	0.00447	0.154	3.97	3.97	12.3	3.1	ENSG00000184226	5101	protocadherin 9 [Source:HGNC Symbol;Acc:HGNC:8661]
ZBTB20	23.2	0.0198	0.262	3.97	3.97	4.94	1.25	ENSG00000181722	26137	zinc finger and BTB domain containing 20 [Source:HGNC Symbol;Acc:HGNC:13503]
PIK3C2G	11	0.0254	0.286	3.96	3.96	2.79	0.704	ENSG00000139144	5288	phosphatidylinositol-4-phosphate 3-kinase catalytic subunit type 2 gamma [Source:HGNC Symbol;Acc:HGNC:8973]
NPR3	475	0.0132	0.224	3.94	3.94	49.7	12.6	ENSG00000113389	4883	natriuretic peptide receptor 3 [Source:HGNC Symbol;Acc:HGNC:7945]
GREM2	13.5	0.0245	0.281	3.93	3.93	0.643	0.163	ENSG00000180875	64388	gremlin 2, DAN family BMP antagonist [Source:HGNC Symbol;Acc:HGNC:17655]
KCNK3	9.25	0.0189	0.258	3.93	3.93	0.785	0.2	ENSG00000171303	3777	potassium two pore domain channel subfamily K member 3 [Source:HGNC Symbol;Acc:HGNC:6278]
DISP2	13.9	0.0156	0.237	3.92	3.92	1.79	0.457	ENSG00000140323	85455	dispatched RND transporter family member 2 [Source:HGNC Symbol;Acc:HGNC:19712]
RARA-AS1	9.87	0.00854	0.19	3.91	3.91	2.5	0.64	ENSG00000265666	NA	RARA antisense RNA 1 [Source:HGNC Symbol;Acc:HGNC:49577]
MID2	12.7	0.0108	0.209	3.9	3.9	3.6	0.923	ENSG00000080561	11043	midline 2 [Source:HGNC Symbol;Acc:HGNC:7096]
EVA1B	15.6	0.00538	0.163	3.89	3.89	4.93	1.27	ENSG00000142694	55194	eva-1 homolog B [Source:HGNC Symbol;Acc:HGNC:25558]
GOLGA7B	2.57	0.0292	0.301	3.89	3.89	0.442	0.114	ENSG00000155265	401647	golgin A7 family member B [Source:HGNC Symbol;Acc:HGNC:31668]
DUSP9	10.4	0.0251	0.285	3.88	3.88	2.68	0.691	ENSG00000130829	1852	dual specificity phosphatase 9 [Source:HGNC Symbol;Acc:HGNC:3076]
LBX2-AS1	5.55	0.00617	0.171	3.88	3.88	1.14	0.294	ENSG00000257702	NA	LBX2 antisense RNA 1 [Source:HGNC Symbol;Acc:HGNC:25136]
ADGRD1	22.8	0.00138	0.101	3.87	3.87	4.12	1.06	ENSG00000111452	283383	adhesion G protein-coupled receptor D1 [Source:HGNC Symbol;Acc:HGNC:19893]
CHURC1-FNTB	2.03	0.0276	0.295	3.87	3.87	0.41	0.106	ENSG00000125954	100529261	CHURC1-FNTB readthrough [Source:HGNC Symbol;Acc:HGNC:42960]
GBX2	26.8	0.0152	0.235	3.86	3.86	9.12	2.36	ENSG00000168505	2637	gastrulation brain homeobox 2 [Source:HGNC Symbol;Acc:HGNC:4186]
PHYHIPL	29.7	0.00172	0.109	3.86	3.86	5.76	1.49	ENSG00000165443	84457	phytanoyl-CoA 2-hydroxylase interacting protein like [Source:HGNC Symbol;Acc:HGNC:29378]
BMS1P2	6.25	0.0178	0.252	3.85	3.85	1.62	0.42	ENSG00000251079	NA	BMS1 pseudogene 2 [Source:HGNC Symbol;Acc:HGNC:23650]
HLF	2.01	0.0264	0.291	3.84	3.84	0.543	0.141	ENSG00000108924	3131	HLF transcription factor, PAR bZIP family member [Source:HGNC Symbol;Acc:HGNC:4977]
ITGA1	30.5	0.00615	0.171	3.84	3.84	5	1.3	ENSG00000213949	3672	integrin subunit alpha 1 [Source:HGNC Symbol;Acc:HGNC:6134]
RPL23AP87	1.96	0.041	0.339	3.84	3.84	0.591	0.154	ENSG00000232938	NA	ribosomal protein L23a pseudogene 87 [Source:HGNC Symbol;Acc:HGNC:51578]
ACTL6B	7.45	0.0264	0.291	3.83	3.83	0.68	0.178	ENSG00000077080	51412	actin like 6B [Source:HGNC Symbol;Acc:HGNC:160]
EYA2	253	0.00321	0.136	3.81	3.81	29.7	7.78	ENSG00000064655	2139	EYA transcriptional coactivator and phosphatase 2 [Source:HGNC Symbol;Acc:HGNC:3520]
SCARF2	20.4	0.0099	0.202	3.81	3.81	5.38	1.41	ENSG00000244486	91179	scavenger receptor class F member 2 [Source:HGNC Symbol;Acc:HGNC:19869]
REEP1	73.9	0.00314	0.135	3.79	3.79	9.14	2.41	ENSG00000068615	65055	receptor accessory protein 1 [Source:HGNC Symbol;Acc:HGNC:25786]
RGS7BP	7.61	0.0219	0.271	3.78	3.78	2.26	0.599	ENSG00000186479	401190	regulator of G protein signaling 7 binding protein [Source:HGNC Symbol;Acc:HGNC:23271]
VLDLR-AS1	2.94	0.0173	0.248	3.78	3.78	0.613	0.162	ENSG00000236404	NA	VLDLR antisense RNA 1 [Source:HGNC Symbol;Acc:HGNC:49621]
TNS1	124	0.00479	0.157	3.77	3.77	27.3	7.25	ENSG00000079308	7145	tensin 1 [Source:HGNC Symbol;Acc:HGNC:11973]
FGD3	9.41	0.00758	0.184	3.75	3.75	2.47	0.66	ENSG00000127084	89846	FYVE, RhoGEF and PH domain containing 3 [Source:HGNC Symbol;Acc:HGNC:16027]
SLFN13	81	0.000106	0.056	3.75	3.75	19.4	5.17	ENSG00000154760	146857	schlafen family member 13 [Source:HGNC Symbol;Acc:HGNC:26481]
SPHK1	134	0.00248	0.125	3.75	3.75	25	6.68	ENSG00000176170	8877	sphingosine kinase 1 [Source:HGNC Symbol;Acc:HGNC:11240]
TPBGL	20.6	0.0266	0.292	3.75	3.75	1.62	0.433	ENSG00000261594	100507050	trophoblast glycoprotein like [Source:HGNC Symbol;Acc:HGNC:44159]
CACNG4	172	2.83e-05	0.0502	3.73	3.73	30.1	8.07	ENSG00000075461	27092	calcium voltage-gated channel auxiliary subunit gamma 4 [Source:HGNC Symbol;Acc:HGNC:1408]
TRIM29	18.1	0.029	0.301	3.73	3.73	6.33	1.7	ENSG00000137699	23650	tripartite motif containing 29 [Source:HGNC Symbol;Acc:HGNC:17274]
NDRG2	59.8	0.00026	0.0594	3.71	3.71	11.8	3.19	ENSG00000165795	57447	NDRG family member 2 [Source:HGNC Symbol;Acc:HGNC:14460]
RHOJ	23.4	0.0057	0.166	3.7	3.7	4.79	1.29	ENSG00000126785	57381	ras homolog family member J [Source:HGNC Symbol;Acc:HGNC:688]
RUNX1T1	177	0.000655	0.0789	3.68	3.68	28.9	7.85	ENSG00000079102	862	RUNX1 partner transcriptional co-repressor 1 [Source:HGNC Symbol;Acc:HGNC:1535]
CYTL1	8.67	0.00525	0.162	3.67	3.67	1.43	0.391	ENSG00000170891	54360	cytokine like 1 [Source:HGNC Symbol;Acc:HGNC:24435]
LONRF2	7.52	0.012	0.217	3.67	3.67	2.07	0.565	ENSG00000170500	164832	LON peptidase N-terminal domain and ring finger 2 [Source:HGNC Symbol;Acc:HGNC:24788]
PCOLCE	54.4	0.0496	0.366	3.67	3.67	17.9	4.88	ENSG00000106333	5118	procollagen C-endopeptidase enhancer [Source:HGNC Symbol;Acc:HGNC:8738]
SLC27A2	46	0.0492	0.365	3.67	3.67	13.3	3.63	ENSG00000140284	11001	solute carrier family 27 member 2 [Source:HGNC Symbol;Acc:HGNC:10996]
ABCA10	2.31	0.0363	0.327	3.66	3.66	0.416	0.114	ENSG00000154263	10349	ATP binding cassette subfamily A member 10 [Source:HGNC Symbol;Acc:HGNC:30]
ELMOD1	11.7	0.0397	0.336	3.66	3.66	1.32	0.36	ENSG00000110675	55531	ELMO domain containing 1 [Source:HGNC Symbol;Acc:HGNC:25334]
SYNE1	38.3	0.00139	0.101	3.66	3.66	8.08	2.21	ENSG00000131018	23345	spectrin repeat containing nuclear envelope protein 1 [Source:HGNC Symbol;Acc:HGNC:17089]
KCTD12	152	0.00428	0.152	3.65	3.65	34.8	9.53	ENSG00000178695	115207	potassium channel tetramerization domain containing 12 [Source:HGNC Symbol;Acc:HGNC:14678]
WDR86	68.7	0.0212	0.268	3.65	3.65	20.7	5.69	ENSG00000187260	349136	WD repeat domain 86 [Source:HGNC Symbol;Acc:HGNC:28020]
KLHDC1	4.86	0.00664	0.177	3.64	3.64	0.999	0.275	ENSG00000197776	122773	kelch domain containing 1 [Source:HGNC Symbol;Acc:HGNC:19836]
PNMA8C	20.1	0.0363	0.327	3.63	3.63	4.25	1.17	ENSG00000277531	NA	PNMA family member 8C [Source:HGNC Symbol;Acc:HGNC:53427]
FOXE3	32.3	0.0125	0.221	3.62	3.62	3.26	0.901	ENSG00000186790	2301	forkhead box E3 [Source:HGNC Symbol;Acc:HGNC:3808]
RHOBTB3	202	0.00328	0.137	3.62	3.62	45.5	12.6	ENSG00000164292	22836	Rho related BTB domain containing 3 [Source:HGNC Symbol;Acc:HGNC:18757]
SLFN5	277	0.000184	0.0594	3.62	3.62	54.9	15.1	ENSG00000166750	162394	schlafen family member 5 [Source:HGNC Symbol;Acc:HGNC:28286]
CNGB1	3.01	0.0277	0.295	3.61	3.61	0.691	0.191	ENSG00000070729	1258	cyclic nucleotide gated channel subunit beta 1 [Source:HGNC Symbol;Acc:HGNC:2151]
ESPNP	8.69	0.00768	0.184	3.61	3.61	1.69	0.469	ENSG00000268869	NA	espin pseudogene [Source:HGNC Symbol;Acc:HGNC:23285]
H3P44	1.92	0.0339	0.319	3.61	3.61	0.52	0.144	ENSG00000226881	NA	H3 histone pseudogene 44 [Source:HGNC Symbol;Acc:HGNC:42981]
ARID5B	76.5	0.00733	0.184	3.6	3.6	20.9	5.81	ENSG00000150347	84159	AT-rich interaction domain 5B [Source:HGNC Symbol;Acc:HGNC:17362]
ZFHX2-AS1	2.95	0.0358	0.326	3.6	3.6	0.623	0.173	ENSG00000157306	NA	ZFHX2 antisense RNA 1 [Source:HGNC Symbol;Acc:HGNC:52658]
ADAMTS8	10.7	0.032	0.311	3.59	3.59	2.18	0.608	ENSG00000134917	11095	ADAM metallopeptidase with thrombospondin type 1 motif 8 [Source:HGNC Symbol;Acc:HGNC:224]
ST8SIA1	24	0.00986	0.202	3.59	3.59	4.51	1.26	ENSG00000111728	6489	ST8 alpha-N-acetyl-neuraminide alpha-2,8-sialyltransferase 1 [Source:HGNC Symbol;Acc:HGNC:10869]
CAMK4	60.3	0.00116	0.0956	3.57	3.57	17.9	5	ENSG00000152495	814	calcium/calmodulin dependent protein kinase IV [Source:HGNC Symbol;Acc:HGNC:1464]
DNAJC27-AS1	4.22	0.0274	0.294	3.57	3.57	1.09	0.305	ENSG00000224165	NA	DNAJC27 antisense RNA 1 [Source:HGNC Symbol;Acc:HGNC:42943]
DTNA	104	0.000359	0.0678	3.56	3.56	26.2	7.38	ENSG00000134769	1837	dystrobrevin alpha [Source:HGNC Symbol;Acc:HGNC:3057]
LYST	37	0.00537	0.163	3.56	3.56	7.94	2.23	ENSG00000143669	1130	lysosomal trafficking regulator [Source:HGNC Symbol;Acc:HGNC:1968]
GRIA2	44.2	0.0239	0.279	3.55	3.55	2.79	0.784	ENSG00000120251	2891	glutamate ionotropic receptor AMPA type subunit 2 [Source:HGNC Symbol;Acc:HGNC:4572]
LRRC24	8.79	0.0194	0.26	3.55	3.55	2.15	0.606	ENSG00000254402	441381	leucine rich repeat containing 24 [Source:HGNC Symbol;Acc:HGNC:28947]
SYNE3	11.8	0.00536	0.163	3.55	3.55	1.39	0.391	ENSG00000176438	161176	spectrin repeat containing nuclear envelope family member 3 [Source:HGNC Symbol;Acc:HGNC:19861]
KIF26B	44.5	0.00459	0.156	3.54	3.54	14.7	4.15	ENSG00000281216	55083	kinesin family member 26B [Source:HGNC Symbol;Acc:HGNC:25484]
KIF26B	44.5	0.00459	0.156	3.54	3.54	14.7	4.15	ENSG00000162849	55083	kinesin family member 26B [Source:HGNC Symbol;Acc:HGNC:25484]
TMEFF2	15.5	0.0397	0.336	3.54	3.54	2.98	0.84	ENSG00000144339	23671	transmembrane protein with EGF like and two follistatin like domains 2 [Source:HGNC Symbol;Acc:HGNC:11867]
SMKR1	4.44	0.0323	0.312	3.53	3.53	1.22	0.346	ENSG00000240204	100287482	small lysine rich protein 1 [Source:HGNC Symbol;Acc:HGNC:43561]
ZNF703	145	0.0129	0.222	3.53	3.53	41.6	11.8	ENSG00000183779	80139	zinc finger protein 703 [Source:HGNC Symbol;Acc:HGNC:25883]
NRIP1	1250	0.00108	0.093	3.52	3.52	284	80.6	ENSG00000180530	8204	nuclear receptor interacting protein 1 [Source:HGNC Symbol;Acc:HGNC:8001]
SLC7A4	4.88	0.0451	0.349	3.52	3.52	1.3	0.369	ENSG00000099960	6545	solute carrier family 7 member 4 [Source:HGNC Symbol;Acc:HGNC:11062]
ATP13A4	21.2	0.0277	0.295	3.51	3.51	6.46	1.84	ENSG00000127249	84239	ATPase 13A4 [Source:HGNC Symbol;Acc:HGNC:25422]
LPL	30.3	0.0191	0.259	3.51	3.51	6.49	1.85	ENSG00000175445	4023	lipoprotein lipase [Source:HGNC Symbol;Acc:HGNC:6677]
SOX14	4.76	0.0105	0.207	3.51	3.51	1.43	0.408	ENSG00000168875	8403	SRY-box transcription factor 14 [Source:HGNC Symbol;Acc:HGNC:11193]
SMPDL3A	20.2	0.0138	0.227	3.49	3.49	5.84	1.67	ENSG00000172594	10924	sphingomyelin phosphodiesterase acid like 3A [Source:HGNC Symbol;Acc:HGNC:17389]
WDR86-AS1	2.8	0.0238	0.279	3.49	3.49	0.929	0.266	ENSG00000243836	NA	WDR86 antisense RNA 1 [Source:HGNC Symbol;Acc:HGNC:41186]
FOXQ1	2.72	0.0363	0.327	3.48	3.48	0.733	0.211	ENSG00000164379	94234	forkhead box Q1 [Source:HGNC Symbol;Acc:HGNC:20951]
LHX9	56.2	0.00168	0.109	3.48	3.48	15.2	4.37	ENSG00000143355	56956	LIM homeobox 9 [Source:HGNC Symbol;Acc:HGNC:14222]
SGPP2	150	0.00416	0.149	3.48	3.48	47.7	13.7	ENSG00000163082	130367	sphingosine-1-phosphate phosphatase 2 [Source:HGNC Symbol;Acc:HGNC:19953]
WNT6	30.1	0.0479	0.361	3.48	3.48	9.5	2.73	ENSG00000115596	7475	Wnt family member 6 [Source:HGNC Symbol;Acc:HGNC:12785]
CELF3	96.5	0.0213	0.268	3.47	3.47	7.54	2.17	ENSG00000159409	11189	CUGBP Elav-like family member 3 [Source:HGNC Symbol;Acc:HGNC:11967]
DOK6	77.7	0.000519	0.0748	3.47	3.47	15.1	4.35	ENSG00000206052	220164	docking protein 6 [Source:HGNC Symbol;Acc:HGNC:28301]
NBEAP1	1.88	0.0399	0.337	3.47	3.47	0.357	0.103	ENSG00000258590	NA	neurobeachin pseudogene 1 [Source:HGNC Symbol;Acc:HGNC:1007]
NSG2	6.31	0.0278	0.295	3.47	3.47	0.932	0.269	ENSG00000170091	51617	neuronal vesicle trafficking associated 2 [Source:HGNC Symbol;Acc:HGNC:24955]
FNDC5	179	0.0257	0.287	3.46	3.46	22.4	6.48	ENSG00000160097	252995	fibronectin type III domain containing 5 [Source:HGNC Symbol;Acc:HGNC:20240]
LYPLAL1-DT	2.17	0.0319	0.311	3.46	3.46	0.498	0.144	ENSG00000228063	NA	LYPLAL1 divergent transcript [Source:HGNC Symbol;Acc:HGNC:50560]
FBXO32	9.43	0.00473	0.157	3.45	3.45	2.22	0.643	ENSG00000156804	114907	F-box protein 32 [Source:HGNC Symbol;Acc:HGNC:16731]
DCLK2	65.3	0.000455	0.0715	3.44	3.44	14.3	4.15	ENSG00000170390	166614	doublecortin like kinase 2 [Source:HGNC Symbol;Acc:HGNC:19002]
ATXN1	19.6	0.00465	0.156	3.43	3.43	5.47	1.59	ENSG00000124788	6310	ataxin 1 [Source:HGNC Symbol;Acc:HGNC:10548]
PRSS22	2.58	0.0152	0.235	3.43	3.43	0.78	0.227	ENSG00000005001	64063	serine protease 22 [Source:HGNC Symbol;Acc:HGNC:14368]
PRSS22	2.58	0.0152	0.235	3.43	3.43	0.78	0.227	ENSG00000282937	64063	serine protease 22 [Source:HGNC Symbol;Acc:HGNC:14368]
CYTOR	1.83	0.0357	0.326	3.42	3.42	0.394	0.115	ENSG00000222041	NA	cytoskeleton regulator RNA [Source:HGNC Symbol;Acc:HGNC:28717]
MFSD6	29.3	0.00227	0.121	3.41	3.41	7.66	2.25	ENSG00000151690	54842	major facilitator superfamily domain containing 6 [Source:HGNC Symbol;Acc:HGNC:24711]
MIR31HG	2.08	0.045	0.349	3.41	3.41	0.68	0.2	ENSG00000171889	NA	MIR31 host gene [Source:HGNC Symbol;Acc:HGNC:37187]
SLC46A3	5.36	0.0255	0.286	3.41	3.41	1.16	0.341	ENSG00000139508	283537	solute carrier family 46 member 3 [Source:HGNC Symbol;Acc:HGNC:27501]
SSTR1	2.03	0.0368	0.328	3.41	3.41	0.68	0.2	ENSG00000139874	6751	somatostatin receptor 1 [Source:HGNC Symbol;Acc:HGNC:11330]
ARHGEF3	26.6	0.000616	0.0789	3.4	3.4	6.31	1.86	ENSG00000163947	50650	Rho guanine nucleotide exchange factor 3 [Source:HGNC Symbol;Acc:HGNC:683]
IL13RA1	102	0.000782	0.0844	3.4	3.4	27.6	8.12	ENSG00000131724	3597	interleukin 13 receptor subunit alpha 1 [Source:HGNC Symbol;Acc:HGNC:5974]
SYDE2	64.7	0.034	0.319	3.37	3.37	18.8	5.59	ENSG00000097096	84144	synapse defective Rho GTPase homolog 2 [Source:HGNC Symbol;Acc:HGNC:25841]
ASGR1	13.6	0.00486	0.157	3.36	3.36	3.08	0.915	ENSG00000141505	432	asialoglycoprotein receptor 1 [Source:HGNC Symbol;Acc:HGNC:742]
CDK6	267	0.00191	0.111	3.36	3.36	53.9	16.1	ENSG00000105810	1021	cyclin dependent kinase 6 [Source:HGNC Symbol;Acc:HGNC:1777]
CFAP47	3.79	0.0423	0.341	3.36	3.36	0.821	0.244	ENSG00000165164	286464	cilia and flagella associated protein 47 [Source:HGNC Symbol;Acc:HGNC:26708]
FAM110B	256	0.000947	0.089	3.36	3.36	51.7	15.4	ENSG00000169122	90362	family with sequence similarity 110 member B [Source:HGNC Symbol;Acc:HGNC:28587]
CPB2-AS1	24.1	0.00106	0.092	3.35	3.35	4.75	1.42	ENSG00000235903	NA	CPB2 antisense RNA 1 [Source:HGNC Symbol;Acc:HGNC:39898]
FAM110C	12.6	0.00335	0.138	3.33	3.33	3.87	1.16	ENSG00000184731	642273	family with sequence similarity 110 member C [Source:HGNC Symbol;Acc:HGNC:33340]
ITPRID2	341	0.000165	0.0594	3.33	3.33	87.5	26.2	ENSG00000138434	6744	ITPR interacting domain containing 2 [Source:HGNC Symbol;Acc:HGNC:11319]
PLEKHN1	7.65	0.00777	0.186	3.33	3.33	2.3	0.692	ENSG00000187583	84069	pleckstrin homology domain containing N1 [Source:HGNC Symbol;Acc:HGNC:25284]
SPNS2	45.7	0.00451	0.155	3.33	3.33	8.15	2.45	ENSG00000183018	124976	sphingolipid transporter 2 [Source:HGNC Symbol;Acc:HGNC:26992]
GPM6A	82	0.00388	0.146	3.32	3.32	18.3	5.52	ENSG00000150625	2823	glycoprotein M6A [Source:HGNC Symbol;Acc:HGNC:4460]
NHLRC4	1.35	0.0436	0.345	3.32	3.32	0.249	0.0749	ENSG00000257108	283948	NHL repeat containing 4 [Source:HGNC Symbol;Acc:HGNC:26700]
PLK2	130	0.00674	0.178	3.32	3.32	32.2	9.69	ENSG00000145632	10769	polo like kinase 2 [Source:HGNC Symbol;Acc:HGNC:19699]
RHOBTB2	195	0.000221	0.0594	3.32	3.32	39.1	11.8	ENSG00000008853	23221	Rho related BTB domain containing 2 [Source:HGNC Symbol;Acc:HGNC:18756]
CRIP2	43.8	0.00555	0.165	3.31	3.31	9.23	2.79	ENSG00000182809	1397	cysteine rich protein 2 [Source:HGNC Symbol;Acc:HGNC:2361]
DOCK8-AS1	5.21	0.0116	0.214	3.31	3.31	1.35	0.408	ENSG00000183784	NA	DOCK8 antisense RNA 1 [Source:HGNC Symbol;Acc:HGNC:26436]
CYP2J2	1.86	0.0402	0.337	3.3	3.3	0.494	0.15	ENSG00000134716	1573	cytochrome P450 family 2 subfamily J member 2 [Source:HGNC Symbol;Acc:HGNC:2634]
SYTL5	15.3	0.0187	0.258	3.3	3.3	4.01	1.22	ENSG00000147041	94122	synaptotagmin like 5 [Source:HGNC Symbol;Acc:HGNC:15589]
TMEM71	1.74	0.0468	0.357	3.3	3.3	0.219	0.0665	ENSG00000165071	137835	transmembrane protein 71 [Source:HGNC Symbol;Acc:HGNC:26572]
METTL14-DT	2.38	0.0216	0.269	3.29	3.29	0.502	0.152	ENSG00000281731	NA	METTL14 divergent transcript [Source:HGNC Symbol;Acc:HGNC:53367]
ABCA4	43.1	0.0148	0.234	3.28	3.28	12.9	3.91	ENSG00000198691	24	ATP binding cassette subfamily A member 4 [Source:HGNC Symbol;Acc:HGNC:34]
BAMBI	33.2	0.0359	0.326	3.28	3.28	9.41	2.87	ENSG00000095739	25805	BMP and activin membrane bound inhibitor [Source:HGNC Symbol;Acc:HGNC:30251]
ITGA8	120	0.0382	0.332	3.28	3.28	22.4	6.84	ENSG00000077943	8516	integrin subunit alpha 8 [Source:HGNC Symbol;Acc:HGNC:6144]
NCR3LG1	9.84	0.0042	0.15	3.28	3.28	2.17	0.66	ENSG00000188211	374383	natural killer cell cytotoxicity receptor 3 ligand 1 [Source:HGNC Symbol;Acc:HGNC:42400]
CCNA1	3.41	0.0186	0.257	3.27	3.27	0.554	0.169	ENSG00000133101	8900	cyclin A1 [Source:HGNC Symbol;Acc:HGNC:1577]
KCNH7	5.93	0.013	0.222	3.27	3.27	1.47	0.449	ENSG00000184611	90134	potassium voltage-gated channel subfamily H member 7 [Source:HGNC Symbol;Acc:HGNC:18863]
NPFFR2	10.7	0.00554	0.165	3.27	3.27	1.88	0.574	ENSG00000056291	10886	neuropeptide FF receptor 2 [Source:HGNC Symbol;Acc:HGNC:4525]
ITIH4	5.51	0.0167	0.243	3.26	3.26	1.03	0.317	ENSG00000055955	3700	inter-alpha-trypsin inhibitor heavy chain 4 [Source:HGNC Symbol;Acc:HGNC:6169]
NDRG1	58.8	0.0209	0.267	3.26	3.26	11.7	3.59	ENSG00000104419	10397	N-myc downstream regulated 1 [Source:HGNC Symbol;Acc:HGNC:7679]
STMN2	1320	0.000801	0.0844	3.26	3.26	101	31	ENSG00000104435	11075	stathmin 2 [Source:HGNC Symbol;Acc:HGNC:10577]
LMNTD1	7.4	0.023	0.275	3.25	3.25	1.68	0.518	ENSG00000152936	160492	lamin tail domain containing 1 [Source:HGNC Symbol;Acc:HGNC:26683]
DNAJC12	28.6	0.00199	0.113	3.24	3.24	3.24	0.999	ENSG00000108176	56521	DnaJ heat shock protein family (Hsp40) member C12 [Source:HGNC Symbol;Acc:HGNC:28908]
FGD5	22.6	0.0432	0.344	3.24	3.24	7.48	2.31	ENSG00000154783	152273	FYVE, RhoGEF and PH domain containing 5 [Source:HGNC Symbol;Acc:HGNC:19117]
NFASC	146	0.0187	0.258	3.24	3.24	26.9	8.3	ENSG00000163531	23114	neurofascin [Source:HGNC Symbol;Acc:HGNC:29866]
TCAF2	4.37	0.0263	0.291	3.24	3.24	1.26	0.387	ENSG00000170379	285966	TRPM8 channel associated factor 2 [Source:HGNC Symbol;Acc:HGNC:26878]
ITIH5	13.4	0.0267	0.292	3.23	3.23	3.92	1.21	ENSG00000123243	80760	inter-alpha-trypsin inhibitor heavy chain 5 [Source:HGNC Symbol;Acc:HGNC:21449]
MORN3	29.3	0.00732	0.184	3.23	3.23	8.12	2.52	ENSG00000139714	283385	MORN repeat containing 3 [Source:HGNC Symbol;Acc:HGNC:29807]
NUTM2B	6.47	0.0391	0.335	3.23	3.23	1.21	0.374	ENSG00000188199	729262	NUT family member 2B [Source:HGNC Symbol;Acc:HGNC:23445]
EHHADH	29.2	0.0016	0.109	3.22	3.22	9.14	2.84	ENSG00000113790	1962	enoyl-CoA hydratase and 3-hydroxyacyl CoA dehydrogenase [Source:HGNC Symbol;Acc:HGNC:3247]
INPP1	21.6	0.00652	0.176	3.22	3.22	4.3	1.33	ENSG00000151689	3628	inositol polyphosphate-1-phosphatase [Source:HGNC Symbol;Acc:HGNC:6071]
CALCRL	24.2	0.000878	0.0875	3.21	3.21	6.23	1.94	ENSG00000064989	10203	calcitonin receptor like receptor [Source:HGNC Symbol;Acc:HGNC:16709]
MT1E	6.7	0.0413	0.339	3.21	3.21	2.34	0.729	ENSG00000169715	4493	metallothionein 1E [Source:HGNC Symbol;Acc:HGNC:7397]
PTGS2	3.27	0.0164	0.242	3.21	3.21	1.03	0.322	ENSG00000073756	5743	prostaglandin-endoperoxide synthase 2 [Source:HGNC Symbol;Acc:HGNC:9605]
TMC5	31.2	0.015	0.235	3.21	3.21	3.66	1.14	ENSG00000103534	79838	transmembrane channel like 5 [Source:HGNC Symbol;Acc:HGNC:22999]
MAPK8IP2	126	0.00496	0.157	3.2	3.2	16	5	ENSG00000008735	23542	mitogen-activated protein kinase 8 interacting protein 2 [Source:HGNC Symbol;Acc:HGNC:6883]
RIMBP2	137	0.00315	0.136	3.2	3.2	29.7	9.29	ENSG00000060709	23504	RIMS binding protein 2 [Source:HGNC Symbol;Acc:HGNC:30339]
GRAMD2A	13.3	0.0243	0.281	3.19	3.19	3.35	1.05	ENSG00000175318	196996	GRAM domain containing 2A [Source:HGNC Symbol;Acc:HGNC:27287]
S100A11	158	0.00904	0.196	3.18	3.18	48.6	15.3	ENSG00000163191	6282	S100 calcium binding protein A11 [Source:HGNC Symbol;Acc:HGNC:10488]
CBLN1	226	0.00023	0.0594	3.17	3.17	18.4	5.81	ENSG00000102924	869	cerebellin 1 precursor [Source:HGNC Symbol;Acc:HGNC:1543]
DNAH10	4.87	0.0238	0.279	3.17	3.17	0.747	0.236	ENSG00000281935	196385	dynein axonemal heavy chain 10 [Source:HGNC Symbol;Acc:HGNC:2941]
DNAH10	4.87	0.0238	0.279	3.17	3.17	0.747	0.236	ENSG00000197653	196385	dynein axonemal heavy chain 10 [Source:HGNC Symbol;Acc:HGNC:2941]
GFRA3	27.5	0.00588	0.169	3.17	3.17	3.05	0.962	ENSG00000146013	2676	GDNF family receptor alpha 3 [Source:HGNC Symbol;Acc:HGNC:4245]
TCTEX1D1	2.14	0.0498	0.366	3.17	3.17	0.36	0.114	ENSG00000152760	200132	Tctex1 domain containing 1 [Source:HGNC Symbol;Acc:HGNC:26882]
NR2F1	1210	0.00959	0.2	3.16	3.16	197	62.3	ENSG00000175745	7025	nuclear receptor subfamily 2 group F member 1 [Source:HGNC Symbol;Acc:HGNC:7975]
SPTLC3	71.3	0.0193	0.26	3.16	3.16	22.4	7.09	ENSG00000172296	55304	serine palmitoyltransferase long chain base subunit 3 [Source:HGNC Symbol;Acc:HGNC:16253]
ABCG2	42.7	0.0386	0.333	3.15	3.15	13.6	4.32	ENSG00000118777	9429	ATP binding cassette subfamily G member 2 (Junior blood group) [Source:HGNC Symbol;Acc:HGNC:74]
CACNA1C	30.3	0.0088	0.194	3.15	3.15	6.75	2.14	ENSG00000285479	775	calcium voltage-gated channel subunit alpha1 C [Source:HGNC Symbol;Acc:HGNC:1390]
CACNA1C	30.3	0.0088	0.194	3.15	3.15	6.75	2.14	ENSG00000151067	775	calcium voltage-gated channel subunit alpha1 C [Source:HGNC Symbol;Acc:HGNC:1390]
GAS1RR	1.77	0.0371	0.328	3.15	3.15	0.446	0.141	ENSG00000226237	NA	GAS1 adjacent regulatory RNA [Source:HGNC Symbol;Acc:HGNC:52261]
SH3RF3-AS1	2.54	0.0421	0.341	3.15	3.15	0.568	0.18	ENSG00000259863	NA	SH3RF3 antisense RNA 1 [Source:HGNC Symbol;Acc:HGNC:44168]
SLC30A4	32.9	0.00486	0.157	3.15	3.15	6.67	2.12	ENSG00000104154	7782	solute carrier family 30 member 4 [Source:HGNC Symbol;Acc:HGNC:11015]
ST7-AS1	20.4	0.0264	0.291	3.15	3.15	4.44	1.41	ENSG00000227199	NA	ST7 antisense RNA 1 [Source:HGNC Symbol;Acc:HGNC:16000]
C22orf24	7.22	0.0156	0.237	3.14	3.14	1.62	0.516	ENSG00000128254	25775	chromosome 22 open reading frame 24 [Source:HGNC Symbol;Acc:HGNC:23051]
EXPH5	13.6	0.0155	0.237	3.14	3.14	4.21	1.34	ENSG00000110723	23086	exophilin 5 [Source:HGNC Symbol;Acc:HGNC:30578]
LINC00882	2.01	0.0333	0.317	3.14	3.14	0.357	0.114	ENSG00000242759	NA	long intergenic non-protein coding RNA 882 [Source:HGNC Symbol;Acc:HGNC:48568]
LINC00900	54.7	0.00588	0.169	3.14	3.14	7.09	2.26	ENSG00000246100	NA	long intergenic non-protein coding RNA 900 [Source:HGNC Symbol;Acc:HGNC:27444]
ACTC1	270	0.000485	0.0724	3.13	3.13	17.8	5.67	ENSG00000159251	70	actin alpha cardiac muscle 1 [Source:HGNC Symbol;Acc:HGNC:143]
EMP1	15.2	0.023	0.275	3.13	3.13	4.45	1.42	ENSG00000134531	2012	epithelial membrane protein 1 [Source:HGNC Symbol;Acc:HGNC:3333]
SKAP2	38.4	0.0134	0.225	3.13	3.13	11.9	3.79	ENSG00000005020	8935	src kinase associated phosphoprotein 2 [Source:HGNC Symbol;Acc:HGNC:15687]
ZNF804A	6.4	0.0267	0.292	3.13	3.13	0.416	0.133	ENSG00000170396	91752	zinc finger protein 804A [Source:HGNC Symbol;Acc:HGNC:21711]
RNF213-AS1	12.2	0.0104	0.206	3.12	3.12	3	0.962	ENSG00000263069	NA	RNF213 antisense RNA 1 [Source:HGNC Symbol;Acc:HGNC:54402]
CNGA3	2.6	0.0423	0.341	3.11	3.11	0.353	0.114	ENSG00000144191	1261	cyclic nucleotide gated channel subunit alpha 3 [Source:HGNC Symbol;Acc:HGNC:2150]
COBLL1	39.1	0.00172	0.109	3.11	3.11	8.92	2.87	ENSG00000082438	22837	cordon-bleu WH2 repeat protein like 1 [Source:HGNC Symbol;Acc:HGNC:23571]
RBP1	257	0.00367	0.144	3.11	3.11	59.9	19.2	ENSG00000114115	5947	retinol binding protein 1 [Source:HGNC Symbol;Acc:HGNC:9919]
VEPH1	73.8	0.0125	0.221	3.11	3.11	11.2	3.58	ENSG00000197415	79674	ventricular zone expressed PH domain containing 1 [Source:HGNC Symbol;Acc:HGNC:25735]
CFAP61	5.47	0.0283	0.298	3.1	3.1	0.765	0.247	ENSG00000089101	26074	cilia and flagella associated protein 61 [Source:HGNC Symbol;Acc:HGNC:15872]
CRYBG1	32.6	0.0135	0.226	3.1	3.1	8.21	2.65	ENSG00000112297	202	crystallin beta-gamma domain containing 1 [Source:HGNC Symbol;Acc:HGNC:356]
METTL7A	14.9	0.00744	0.184	3.1	3.1	4.14	1.33	ENSG00000185432	25840	methyltransferase like 7A [Source:HGNC Symbol;Acc:HGNC:24550]
OSTN	3.24	0.0285	0.299	3.09	3.09	0.728	0.236	ENSG00000188729	344901	osteocrin [Source:HGNC Symbol;Acc:HGNC:29961]
CRYBG2	106	0.00034	0.0674	3.08	3.08	18.9	6.12	ENSG00000176092	55057	crystallin beta-gamma domain containing 2 [Source:HGNC Symbol;Acc:HGNC:17295]
CCN2	132	0.0106	0.208	3.07	3.07	17.6	5.73	ENSG00000118523	1490	cellular communication network factor 2 [Source:HGNC Symbol;Acc:HGNC:2500]
COL1A1	116	0.00434	0.153	3.07	3.07	21.1	6.86	ENSG00000108821	1277	collagen type I alpha 1 chain [Source:HGNC Symbol;Acc:HGNC:2197]
CRYGS	3.88	0.0214	0.268	3.07	3.07	0.903	0.294	ENSG00000213139	1427	crystallin gamma S [Source:HGNC Symbol;Acc:HGNC:2417]
LINC00683	4.36	0.0337	0.318	3.07	3.07	1.17	0.38	ENSG00000266256	NA	long intergenic non-protein coding RNA 683 [Source:HGNC Symbol;Acc:HGNC:44467]
LRFN5	10.9	0.017	0.246	3.07	3.07	1.97	0.64	ENSG00000165379	145581	leucine rich repeat and fibronectin type III domain containing 5 [Source:HGNC Symbol;Acc:HGNC:20360]
ZFHX3	310	0.00347	0.14	3.07	3.07	65.7	21.4	ENSG00000140836	463	zinc finger homeobox 3 [Source:HGNC Symbol;Acc:HGNC:777]
LIMCH1	71.8	0.000405	0.0715	3.06	3.06	12.6	4.11	ENSG00000064042	22998	LIM and calponin homology domains 1 [Source:HGNC Symbol;Acc:HGNC:29191]
SLC16A4	57.2	0.00477	0.157	3.06	3.06	16.2	5.28	ENSG00000168679	9122	solute carrier family 16 member 4 [Source:HGNC Symbol;Acc:HGNC:10925]
TIFA	54.7	0.000619	0.0789	3.06	3.06	13.4	4.37	ENSG00000145365	92610	TRAF interacting protein with forkhead associated domain [Source:HGNC Symbol;Acc:HGNC:19075]
LINC02798	3.26	0.0189	0.258	3.05	3.05	0.862	0.283	ENSG00000227082	NA	long intergenic non-protein coding RNA 2798 [Source:HGNC Symbol;Acc:HGNC:54323]
SYTL3	5.09	0.0297	0.303	3.05	3.05	1.05	0.344	ENSG00000164674	94120	synaptotagmin like 3 [Source:HGNC Symbol;Acc:HGNC:15587]
CNTN1	68.1	0.00329	0.137	3.04	3.04	15.7	5.17	ENSG00000018236	1272	contactin 1 [Source:HGNC Symbol;Acc:HGNC:2171]
DRGX	18.5	0.0425	0.342	3.04	3.04	0.877	0.288	ENSG00000165606	644168	dorsal root ganglia homeobox [Source:HGNC Symbol;Acc:HGNC:21536]
NR3C1	33.3	0.0225	0.273	3.04	3.04	9	2.96	ENSG00000113580	2908	nuclear receptor subfamily 3 group C member 1 [Source:HGNC Symbol;Acc:HGNC:7978]
PIK3R1	493	0.000526	0.0748	3.03	3.03	98.1	32.4	ENSG00000145675	5295	phosphoinositide-3-kinase regulatory subunit 1 [Source:HGNC Symbol;Acc:HGNC:8979]
EBF1	279	0.00679	0.178	3.02	3.02	23.5	7.77	ENSG00000164330	1879	EBF transcription factor 1 [Source:HGNC Symbol;Acc:HGNC:3126]
HPCA	30.8	0.0427	0.342	3.02	3.02	3.99	1.32	ENSG00000121905	3208	hippocalcin [Source:HGNC Symbol;Acc:HGNC:5144]
LAMA3	4.77	0.03	0.304	3.01	3.01	1.18	0.394	ENSG00000053747	3909	laminin subunit alpha 3 [Source:HGNC Symbol;Acc:HGNC:6483]
SLC7A14	2.45	0.037	0.328	3	3	0.658	0.219	ENSG00000013293	57709	solute carrier family 7 member 14 [Source:HGNC Symbol;Acc:HGNC:29326]
VPS33B-DT	2.41	0.0472	0.359	3	3	0.65	0.216	ENSG00000214432	NA	VPS33B divergent transcript [Source:HGNC Symbol;Acc:HGNC:51413]
ADGRG6	55.9	0.0164	0.242	2.97	2.97	11.5	3.87	ENSG00000112414	57211	adhesion G protein-coupled receptor G6 [Source:HGNC Symbol;Acc:HGNC:13841]
COL1A2	1560	0.00426	0.151	2.97	2.97	296	99.7	ENSG00000164692	1278	collagen type I alpha 2 chain [Source:HGNC Symbol;Acc:HGNC:2198]
GABBR2	69.9	0.00171	0.109	2.97	2.97	3.88	1.31	ENSG00000136928	9568	gamma-aminobutyric acid type B receptor subunit 2 [Source:HGNC Symbol;Acc:HGNC:4507]
IFFO2	54.4	0.000642	0.0789	2.97	2.97	7.24	2.44	ENSG00000169991	126917	intermediate filament family orphan 2 [Source:HGNC Symbol;Acc:HGNC:27006]
NR2F2-AS1	6.27	0.0353	0.325	2.97	2.97	1.37	0.46	ENSG00000247809	NA	NR2F2 antisense RNA 1 [Source:HGNC Symbol;Acc:HGNC:44222]
ELAVL2	467	0.00533	0.163	2.96	2.96	39.5	13.4	ENSG00000107105	1993	ELAV like RNA binding protein 2 [Source:HGNC Symbol;Acc:HGNC:3313]
INHBE	20.9	0.0177	0.252	2.96	2.96	2.14	0.722	ENSG00000139269	83729	inhibin subunit beta E [Source:HGNC Symbol;Acc:HGNC:24029]
ANXA1	72.4	0.016	0.24	2.95	2.95	17.7	5.99	ENSG00000135046	301	annexin A1 [Source:HGNC Symbol;Acc:HGNC:533]
NAALADL2	51.3	0.0164	0.242	2.95	2.95	14.6	4.94	ENSG00000177694	254827	N-acetylated alpha-linked acidic dipeptidase like 2 [Source:HGNC Symbol;Acc:HGNC:23219]
HRH2	6.83	0.0239	0.279	2.94	2.94	1.61	0.547	ENSG00000113749	3274	histamine receptor H2 [Source:HGNC Symbol;Acc:HGNC:5183]
TIMP3	281	0.0129	0.222	2.94	2.94	31.5	10.7	ENSG00000100234	7078	TIMP metallopeptidase inhibitor 3 [Source:HGNC Symbol;Acc:HGNC:11822]
ERP27	35.2	0.0256	0.286	2.93	2.93	11.1	3.78	ENSG00000139055	121506	endoplasmic reticulum protein 27 [Source:HGNC Symbol;Acc:HGNC:26495]
RCSD1	31.7	0.0081	0.189	2.93	2.93	2.22	0.757	ENSG00000198771	92241	RCSD domain containing 1 [Source:HGNC Symbol;Acc:HGNC:28310]
OSTCP1	2.69	0.0434	0.344	2.92	2.92	0.665	0.227	ENSG00000243775	NA	oligosaccharyltransferase complex subunit pseudogene 1 [Source:HGNC Symbol;Acc:HGNC:30530]
RBMS3-AS3	2.96	0.0345	0.322	2.92	2.92	0.494	0.169	ENSG00000235904	NA	RBMS3 antisense RNA 3 [Source:HGNC Symbol;Acc:HGNC:39989]
DCLK3	20.6	0.00362	0.144	2.91	2.91	2.37	0.813	ENSG00000163673	85443	doublecortin like kinase 3 [Source:HGNC Symbol;Acc:HGNC:19005]
GNRHR	2.65	0.0388	0.334	2.91	2.91	0.717	0.247	ENSG00000109163	2798	gonadotropin releasing hormone receptor [Source:HGNC Symbol;Acc:HGNC:4421]
KCNJ8	5.33	0.0413	0.339	2.91	2.91	0.654	0.225	ENSG00000121361	3764	potassium inwardly rectifying channel subfamily J member 8 [Source:HGNC Symbol;Acc:HGNC:6269]
MEGF9	179	0.000397	0.0715	2.91	2.91	36.2	12.4	ENSG00000106780	1955	multiple EGF like domains 9 [Source:HGNC Symbol;Acc:HGNC:3234]
PLAGL1	87.1	0.0457	0.351	2.91	2.91	14.8	5.11	ENSG00000118495	5325	PLAG1 like zinc finger 1 [Source:HGNC Symbol;Acc:HGNC:9046]
LINC00622	2.34	0.0483	0.362	2.9	2.9	0.491	0.169	ENSG00000260941	NA	long intergenic non-protein coding RNA 622 [Source:HGNC Symbol;Acc:HGNC:44251]
ILDR1	3.79	0.0454	0.35	2.89	2.89	1.14	0.393	ENSG00000145103	286676	immunoglobulin like domain containing receptor 1 [Source:HGNC Symbol;Acc:HGNC:28741]
SLC39A8	313	0.00412	0.149	2.89	2.89	96.6	33.4	ENSG00000138821	64116	solute carrier family 39 member 8 [Source:HGNC Symbol;Acc:HGNC:20862]
FRK	11.3	0.0369	0.328	2.88	2.88	3.03	1.05	ENSG00000111816	2444	fyn related Src family tyrosine kinase [Source:HGNC Symbol;Acc:HGNC:3955]
OSR1	2.12	0.0473	0.359	2.88	2.88	0.606	0.211	ENSG00000143867	130497	odd-skipped related transcription factor 1 [Source:HGNC Symbol;Acc:HGNC:8111]
DOCK10	39.1	0.00342	0.139	2.87	2.87	7.33	2.55	ENSG00000135905	55619	dedicator of cytokinesis 10 [Source:HGNC Symbol;Acc:HGNC:23479]
BMF	907	0.00152	0.107	2.86	2.86	211	73.8	ENSG00000104081	90427	Bcl2 modifying factor [Source:HGNC Symbol;Acc:HGNC:24132]
CALHM2	21.2	0.00845	0.19	2.86	2.86	4.62	1.61	ENSG00000138172	51063	calcium homeostasis modulator family member 2 [Source:HGNC Symbol;Acc:HGNC:23493]
LIFR-AS1	4.84	0.0151	0.235	2.86	2.86	1.11	0.388	ENSG00000244968	NA	LIFR antisense RNA 1 [Source:HGNC Symbol;Acc:HGNC:43600]
LYPD3	9.67	0.0289	0.301	2.86	2.86	2.38	0.831	ENSG00000124466	27076	LY6/PLAUR domain containing 3 [Source:HGNC Symbol;Acc:HGNC:24880]
SLC27A6	32.2	0.0157	0.238	2.85	2.85	8.72	3.06	ENSG00000113396	28965	solute carrier family 27 member 6 [Source:HGNC Symbol;Acc:HGNC:11000]
ARHGAP28	512	0.000296	0.0616	2.84	2.84	122	43.1	ENSG00000088756	79822	Rho GTPase activating protein 28 [Source:HGNC Symbol;Acc:HGNC:25509]
CHN2	97.1	0.0114	0.214	2.84	2.84	12.4	4.34	ENSG00000106069	1124	chimerin 2 [Source:HGNC Symbol;Acc:HGNC:1944]
FAM110A	250	0.00365	0.144	2.84	2.84	40.7	14.3	ENSG00000125898	83541	family with sequence similarity 110 member A [Source:HGNC Symbol;Acc:HGNC:16188]
PHLDA1	315	0.0306	0.306	2.84	2.84	50.3	17.7	ENSG00000139289	22822	pleckstrin homology like domain family A member 1 [Source:HGNC Symbol;Acc:HGNC:8933]
BACE2	53	0.00816	0.189	2.83	2.83	8.7	3.08	ENSG00000182240	25825	beta-secretase 2 [Source:HGNC Symbol;Acc:HGNC:934]
HES6	103	0.000121	0.0587	2.83	2.83	14.2	5.03	ENSG00000144485	55502	hes family bHLH transcription factor 6 [Source:HGNC Symbol;Acc:HGNC:18254]
STMN3	244	0.0125	0.221	2.83	2.83	31.2	11	ENSG00000197457	50861	stathmin 3 [Source:HGNC Symbol;Acc:HGNC:15926]
ACSS1	19.9	0.0355	0.325	2.82	2.82	5.05	1.79	ENSG00000154930	84532	acyl-CoA synthetase short chain family member 1 [Source:HGNC Symbol;Acc:HGNC:16091]
LYPD6	61.6	0.00282	0.129	2.82	2.82	15.7	5.56	ENSG00000187123	130574	LY6/PLAUR domain containing 6 [Source:HGNC Symbol;Acc:HGNC:28751]
FBXO15	15.8	0.0138	0.227	2.81	2.81	3.55	1.27	ENSG00000141665	201456	F-box protein 15 [Source:HGNC Symbol;Acc:HGNC:13617]
KLHL4	15.1	0.0111	0.211	2.8	2.8	4.39	1.57	ENSG00000102271	56062	kelch like family member 4 [Source:HGNC Symbol;Acc:HGNC:6355]
NR2F2	1070	0.00261	0.127	2.8	2.8	211	75.4	ENSG00000185551	7026	nuclear receptor subfamily 2 group F member 2 [Source:HGNC Symbol;Acc:HGNC:7976]
RNF180	34	0.00189	0.111	2.8	2.8	8.82	3.15	ENSG00000164197	285671	ring finger protein 180 [Source:HGNC Symbol;Acc:HGNC:27752]
CNRIP1	67.6	0.00189	0.111	2.79	2.79	10.2	3.66	ENSG00000119865	25927	cannabinoid receptor interacting protein 1 [Source:HGNC Symbol;Acc:HGNC:24546]
SLC22A5	24.6	0.0116	0.214	2.79	2.79	6.59	2.37	ENSG00000197375	6584	solute carrier family 22 member 5 [Source:HGNC Symbol;Acc:HGNC:10969]
SULT1A1	27	0.00463	0.156	2.78	2.78	6.35	2.28	ENSG00000196502	6817	sulfotransferase family 1A member 1 [Source:HGNC Symbol;Acc:HGNC:11453]
ADAM12	85.2	0.0315	0.31	2.77	2.77	7.32	2.64	ENSG00000148848	8038	ADAM metallopeptidase domain 12 [Source:HGNC Symbol;Acc:HGNC:190]
SPP1	8.98	0.0272	0.293	2.77	2.77	2.21	0.798	ENSG00000118785	6696	secreted phosphoprotein 1 [Source:HGNC Symbol;Acc:HGNC:11255]
WDR78	20.3	0.00339	0.138	2.77	2.77	4.6	1.66	ENSG00000152763	79819	WD repeat domain 78 [Source:HGNC Symbol;Acc:HGNC:26252]
ANKH	119	0.000451	0.0715	2.76	2.76	14.5	5.27	ENSG00000154122	56172	ANKH inorganic pyrophosphate transport regulator [Source:HGNC Symbol;Acc:HGNC:15492]
CHRM4	3.29	0.0426	0.342	2.76	2.76	0.658	0.238	ENSG00000180720	1132	cholinergic receptor muscarinic 4 [Source:HGNC Symbol;Acc:HGNC:1953]
CLDN1	139	0.0237	0.279	2.76	2.76	17.5	6.34	ENSG00000163347	9076	claudin 1 [Source:HGNC Symbol;Acc:HGNC:2032]
DBX2	8.08	0.0237	0.279	2.76	2.76	2.77	1	ENSG00000185610	440097	developing brain homeobox 2 [Source:HGNC Symbol;Acc:HGNC:33186]
RTL5	87.7	0.000598	0.0789	2.76	2.76	16.8	6.07	ENSG00000242732	340526	retrotransposon Gag like 5 [Source:HGNC Symbol;Acc:HGNC:29430]
TP53INP2	124	0.0314	0.31	2.76	2.76	15.6	5.64	ENSG00000078804	58476	tumor protein p53 inducible nuclear protein 2 [Source:HGNC Symbol;Acc:HGNC:16104]
BICC1	16	0.0133	0.224	2.75	2.75	3.13	1.14	ENSG00000122870	80114	BicC family RNA binding protein 1 [Source:HGNC Symbol;Acc:HGNC:19351]
BMP4	90	0.0183	0.256	2.75	2.75	26	9.46	ENSG00000125378	652	bone morphogenetic protein 4 [Source:HGNC Symbol;Acc:HGNC:1071]
CREB5	32.8	0.00481	0.157	2.75	2.75	5.89	2.15	ENSG00000146592	9586	cAMP responsive element binding protein 5 [Source:HGNC Symbol;Acc:HGNC:16844]
NETO1	10.7	0.0148	0.234	2.75	2.75	2.19	0.795	ENSG00000166342	81832	neuropilin and tolloid like 1 [Source:HGNC Symbol;Acc:HGNC:13823]
EPB41L3	199	0.0177	0.252	2.74	2.74	24.3	8.85	ENSG00000082397	23136	erythrocyte membrane protein band 4.1 like 3 [Source:HGNC Symbol;Acc:HGNC:3380]
IPCEF1	5.16	0.0335	0.317	2.74	2.74	1.13	0.413	ENSG00000074706	26034	interaction protein for cytohesin exchange factors 1 [Source:HGNC Symbol;Acc:HGNC:21204]
CDH11	801	0.0166	0.243	2.73	2.73	179	65.7	ENSG00000140937	1009	cadherin 11 [Source:HGNC Symbol;Acc:HGNC:1750]
SYBU	20.1	0.0273	0.294	2.72	2.72	3.72	1.37	ENSG00000147642	55638	syntabulin [Source:HGNC Symbol;Acc:HGNC:26011]
AQP1	2.78	0.0382	0.332	2.71	2.71	0.714	0.264	ENSG00000240583	358	aquaporin 1 (Colton blood group) [Source:HGNC Symbol;Acc:HGNC:633]
PDZRN4	9.4	0.0309	0.307	2.71	2.71	1.71	0.629	ENSG00000165966	29951	PDZ domain containing ring finger 4 [Source:HGNC Symbol;Acc:HGNC:30552]
ARAP2	12.8	0.0316	0.31	2.7	2.7	4.05	1.5	ENSG00000047365	116984	ArfGAP with RhoGAP domain, ankyrin repeat and PH domain 2 [Source:HGNC Symbol;Acc:HGNC:16924]
PPIC	10.9	0.0154	0.237	2.7	2.7	3.16	1.17	ENSG00000168938	5480	peptidylprolyl isomerase C [Source:HGNC Symbol;Acc:HGNC:9256]
DOCK8	72.6	0.018	0.254	2.69	2.69	16.5	6.14	ENSG00000107099	81704	dedicator of cytokinesis 8 [Source:HGNC Symbol;Acc:HGNC:19191]
MEIS1	62.3	0.02	0.263	2.69	2.69	15.7	5.81	ENSG00000143995	4211	Meis homeobox 1 [Source:HGNC Symbol;Acc:HGNC:7000]
MIR9-3HG	16.1	0.0306	0.306	2.69	2.69	3.28	1.22	ENSG00000255571	NA	MIR9-3 host gene [Source:HGNC Symbol;Acc:HGNC:27388]
NBPF20	16.2	0.0102	0.205	2.69	2.69	3.7	1.37	ENSG00000162825	100288142	NBPF member 20 [Source:HGNC Symbol;Acc:HGNC:32000]
ARHGAP23	59.1	0.000663	0.0789	2.68	2.68	12.9	4.8	ENSG00000273780	57636	Rho GTPase activating protein 23 [Source:HGNC Symbol;Acc:HGNC:29293]
ARHGAP23	59.1	0.000663	0.0789	2.68	2.68	12.9	4.8	ENSG00000275832	57636	Rho GTPase activating protein 23 [Source:HGNC Symbol;Acc:HGNC:29293]
LINC02078	7.09	0.0497	0.366	2.68	2.68	0.409	0.152	ENSG00000267719	NA	long intergenic non-protein coding RNA 2078 [Source:HGNC Symbol;Acc:HGNC:52926]
LRRC37A9P	6.92	0.0479	0.361	2.68	2.68	1.56	0.583	ENSG00000271013	NA	leucine rich repeat containing 37 member A9, pseudogene [Source:HGNC Symbol;Acc:HGNC:43813]
LRRC37A9P	6.92	0.0479	0.361	2.68	2.68	1.56	0.583	ENSG00000282486	NA	leucine rich repeat containing 37 member A9, pseudogene [Source:HGNC Symbol;Acc:HGNC:43813]
SMARCA2	46.1	0.00488	0.157	2.68	2.68	10.8	4.05	ENSG00000080503	6595	SWI/SNF related, matrix associated, actin dependent regulator of chromatin, subfamily a, member 2 [Source:HGNC Symbol;Acc:HGNC:11098]
SMIM5	3.15	0.0491	0.365	2.68	2.68	0.668	0.249	ENSG00000204323	643008	small integral membrane protein 5 [Source:HGNC Symbol;Acc:HGNC:40030]
ZBED6	226	0.00376	0.144	2.67	2.67	48.8	18.3	ENSG00000257315	100381270	zinc finger BED-type containing 6 [Source:HGNC Symbol;Acc:HGNC:33273]
ZBED6	226	0.00376	0.144	2.67	2.67	48.8	18.3	ENSG00000257315	9877	zinc finger BED-type containing 6 [Source:HGNC Symbol;Acc:HGNC:33273]
ZNF502	27.8	0.0023	0.121	2.67	2.67	6.1	2.29	ENSG00000281448	91392	zinc finger protein 502 [Source:HGNC Symbol;Acc:HGNC:23718]
ZNF502	27.8	0.0023	0.121	2.67	2.67	6.1	2.29	ENSG00000196653	91392	zinc finger protein 502 [Source:HGNC Symbol;Acc:HGNC:23718]
LINC01963	73.1	0.00113	0.0945	2.65	2.65	14.1	5.3	ENSG00000260804	NA	long intergenic non-protein coding RNA 1963 [Source:HGNC Symbol;Acc:HGNC:25283]
ALDH3B2	13	0.0369	0.328	2.64	2.64	3.57	1.35	ENSG00000132746	222	aldehyde dehydrogenase 3 family member B2 [Source:HGNC Symbol;Acc:HGNC:411]
KLHL14	40.7	0.0119	0.217	2.64	2.64	8.38	3.18	ENSG00000197705	57565	kelch like family member 14 [Source:HGNC Symbol;Acc:HGNC:29266]
MDGA1	626	0.00159	0.108	2.64	2.64	55.3	20.9	ENSG00000112139	266727	MAM domain containing glycosylphosphatidylinositol anchor 1 [Source:HGNC Symbol;Acc:HGNC:19267]
RBM20	8.64	0.0183	0.256	2.64	2.64	1.3	0.494	ENSG00000203867	282996	RNA binding motif protein 20 [Source:HGNC Symbol;Acc:HGNC:27424]
SVIL-AS1	11.4	0.0139	0.228	2.64	2.64	1.65	0.625	ENSG00000224597	NA	SVIL antisense RNA 1 [Source:HGNC Symbol;Acc:HGNC:51219]
ATE1-AS1	6.2	0.0204	0.266	2.63	2.63	1.32	0.503	ENSG00000226864	NA	ATE1 antisense RNA 1 [Source:HGNC Symbol;Acc:HGNC:49496]
ATP8B1	50.1	0.0156	0.237	2.63	2.63	14.7	5.58	ENSG00000081923	5205	ATPase phospholipid transporting 8B1 [Source:HGNC Symbol;Acc:HGNC:3706]
JUN	110	0.00584	0.168	2.63	2.63	19.4	7.37	ENSG00000177606	3725	Jun proto-oncogene, AP-1 transcription factor subunit [Source:HGNC Symbol;Acc:HGNC:6204]
NBPF8	181	0.00443	0.154	2.63	2.63	28.9	11	ENSG00000270231	728841	NBPF member 8 [Source:HGNC Symbol;Acc:HGNC:31990]
GRIK1	3.21	0.0431	0.344	2.62	2.62	0.698	0.266	ENSG00000171189	2897	glutamate ionotropic receptor kainate type subunit 1 [Source:HGNC Symbol;Acc:HGNC:4579]
THSD7B	221	0.0069	0.179	2.61	2.61	9.65	3.7	ENSG00000144229	80731	thrombospondin type 1 domain containing 7B [Source:HGNC Symbol;Acc:HGNC:29348]
UNC79	29.3	0.00232	0.122	2.61	2.61	4.01	1.54	ENSG00000133958	57578	unc-79 homolog, NALCN channel complex subunit [Source:HGNC Symbol;Acc:HGNC:19966]
UNC79	29.3	0.00232	0.122	2.61	2.61	4.01	1.54	ENSG00000276416	57578	unc-79 homolog, NALCN channel complex subunit [Source:HGNC Symbol;Acc:HGNC:19966]
MAP3K13	108	0.00536	0.163	2.6	2.6	31.6	12.1	ENSG00000073803	9175	mitogen-activated protein kinase kinase kinase 13 [Source:HGNC Symbol;Acc:HGNC:6852]
AZIN2	15.9	0.0178	0.252	2.59	2.59	3.78	1.46	ENSG00000142920	113451	antizyme inhibitor 2 [Source:HGNC Symbol;Acc:HGNC:29957]
LRATD1	180	0.0417	0.34	2.59	2.59	37.6	14.5	ENSG00000162981	151354	LRAT domain containing 1 [Source:HGNC Symbol;Acc:HGNC:20743]
MYO7A	73.3	0.00197	0.113	2.59	2.59	20.5	7.93	ENSG00000137474	4647	myosin VIIA [Source:HGNC Symbol;Acc:HGNC:7606]
CD83	32.1	0.00264	0.127	2.58	2.58	6.53	2.53	ENSG00000112149	9308	CD83 molecule [Source:HGNC Symbol;Acc:HGNC:1703]
LPXN	9.63	0.0239	0.279	2.58	2.58	2.2	0.854	ENSG00000110031	9404	leupaxin [Source:HGNC Symbol;Acc:HGNC:14061]
LTBP3	37.3	0.00823	0.189	2.58	2.58	9.36	3.63	ENSG00000168056	4054	latent transforming growth factor beta binding protein 3 [Source:HGNC Symbol;Acc:HGNC:6716]
PRDM12	215	0.027	0.293	2.58	2.58	24.6	9.52	ENSG00000130711	59335	PR/SET domain 12 [Source:HGNC Symbol;Acc:HGNC:13997]
RAB32	19.8	0.0128	0.222	2.58	2.58	4.65	1.8	ENSG00000118508	10981	RAB32, member RAS oncogene family [Source:HGNC Symbol;Acc:HGNC:9772]
ANKRD44	21.6	0.0125	0.221	2.57	2.57	4.01	1.56	ENSG00000065413	91526	ankyrin repeat domain 44 [Source:HGNC Symbol;Acc:HGNC:25259]
EFNA1	62.2	0.0362	0.327	2.57	2.57	18.2	7.09	ENSG00000169242	1942	ephrin A1 [Source:HGNC Symbol;Acc:HGNC:3221]
GDF6	18.8	0.0416	0.339	2.56	2.56	4.8	1.88	ENSG00000156466	392255	growth differentiation factor 6 [Source:HGNC Symbol;Acc:HGNC:4221]
MAGI2-AS3	68	0.000708	0.0805	2.56	2.56	14.4	5.64	ENSG00000234456	NA	MAGI2 antisense RNA 3 [Source:HGNC Symbol;Acc:HGNC:40862]
SP100	4.94	0.0374	0.329	2.56	2.56	1.12	0.438	ENSG00000067066	6672	SP100 nuclear antigen [Source:HGNC Symbol;Acc:HGNC:11206]
SYT17	78.4	0.019	0.258	2.56	2.56	13.6	5.32	ENSG00000103528	51760	synaptotagmin 17 [Source:HGNC Symbol;Acc:HGNC:24119]
ANKS1B	12.2	0.0108	0.209	2.55	2.55	2.47	0.97	ENSG00000185046	56899	ankyrin repeat and sterile alpha motif domain containing 1B [Source:HGNC Symbol;Acc:HGNC:24600]
ATRNL1	91.2	0.000741	0.0812	2.55	2.55	14.7	5.78	ENSG00000107518	26033	attractin like 1 [Source:HGNC Symbol;Acc:HGNC:29063]
METTL24	12.2	0.0415	0.339	2.55	2.55	2.91	1.14	ENSG00000053328	728464	methyltransferase like 24 [Source:HGNC Symbol;Acc:HGNC:21566]
PPP1R3D	24.6	0.00438	0.154	2.55	2.55	4.46	1.75	ENSG00000132825	5509	protein phosphatase 1 regulatory subunit 3D [Source:HGNC Symbol;Acc:HGNC:9294]
SARM1	165	0.00279	0.129	2.55	2.55	21.5	8.45	ENSG00000004139	23098	sterile alpha and TIR motif containing 1 [Source:HGNC Symbol;Acc:HGNC:17074]
AKAP6	64	0.0396	0.336	2.54	2.54	8.24	3.25	ENSG00000151320	9472	A-kinase anchoring protein 6 [Source:HGNC Symbol;Acc:HGNC:376]
CLDN11	25.2	0.00959	0.2	2.54	2.54	7.62	3	ENSG00000013297	5010	claudin 11 [Source:HGNC Symbol;Acc:HGNC:8514]
MAP6	161	0.0482	0.362	2.54	2.54	22	8.66	ENSG00000171533	4135	microtubule associated protein 6 [Source:HGNC Symbol;Acc:HGNC:6868]
AFAP1L1	45.3	0.0334	0.317	2.53	2.53	10.3	4.09	ENSG00000157510	134265	actin filament associated protein 1 like 1 [Source:HGNC Symbol;Acc:HGNC:26714]
ARMCX1	208	5.81e-05	0.0502	2.53	2.53	44.7	17.7	ENSG00000126947	51309	armadillo repeat containing X-linked 1 [Source:HGNC Symbol;Acc:HGNC:18073]
ITPRIPL2	77.5	0.0039	0.147	2.53	2.53	17.7	7.02	ENSG00000205730	162073	ITPRIP like 2 [Source:HGNC Symbol;Acc:HGNC:27257]
PLEKHG1	224	0.0128	0.222	2.53	2.53	53.3	21.1	ENSG00000120278	57480	pleckstrin homology and RhoGEF domain containing G1 [Source:HGNC Symbol;Acc:HGNC:20884]
BCL2	127	0.0258	0.288	2.52	2.52	12.5	4.94	ENSG00000171791	596	BCL2 apoptosis regulator [Source:HGNC Symbol;Acc:HGNC:990]
EMX2OS	696	0.0211	0.267	2.52	2.52	134	53.2	ENSG00000229847	NA	EMX2 opposite strand/antisense RNA [Source:HGNC Symbol;Acc:HGNC:18511]
GFRA1	721	0.000295	0.0616	2.52	2.52	118	46.8	ENSG00000151892	2674	GDNF family receptor alpha 1 [Source:HGNC Symbol;Acc:HGNC:4243]
RNF150	109	0.000447	0.0715	2.52	2.52	25	9.93	ENSG00000170153	57484	ring finger protein 150 [Source:HGNC Symbol;Acc:HGNC:23138]
SLC30A1	270	0.00139	0.101	2.52	2.52	65.5	25.9	ENSG00000170385	7779	solute carrier family 30 member 1 [Source:HGNC Symbol;Acc:HGNC:11012]
THSD7A	105	0.00322	0.136	2.52	2.52	7.94	3.16	ENSG00000005108	221981	thrombospondin type 1 domain containing 7A [Source:HGNC Symbol;Acc:HGNC:22207]
ACSF2	62.7	0.0021	0.117	2.51	2.51	10.4	4.14	ENSG00000167107	80221	acyl-CoA synthetase family member 2 [Source:HGNC Symbol;Acc:HGNC:26101]
MUC15	172	0.043	0.344	2.51	2.51	46.1	18.4	ENSG00000169550	143662	mucin 15, cell surface associated [Source:HGNC Symbol;Acc:HGNC:14956]
ABHD2	399	0.0053	0.162	2.5	2.5	87.4	35	ENSG00000140526	11057	abhydrolase domain containing 2 [Source:HGNC Symbol;Acc:HGNC:18717]
CYP2C8	4.38	0.037	0.328	2.5	2.5	1.03	0.41	ENSG00000138115	1558	cytochrome P450 family 2 subfamily C member 8 [Source:HGNC Symbol;Acc:HGNC:2622]
FAM66B	9.11	0.0333	0.317	2.5	2.5	2.41	0.961	ENSG00000280677	NA	family with sequence similarity 66 member B [Source:HGNC Symbol;Acc:HGNC:28890]
FAM66B	9.11	0.0333	0.317	2.5	2.5	2.41	0.961	ENSG00000215374	NA	family with sequence similarity 66 member B [Source:HGNC Symbol;Acc:HGNC:28890]
MSRB3	36.3	0.0252	0.285	2.49	2.49	8.27	3.32	ENSG00000174099	253827	methionine sulfoxide reductase B3 [Source:HGNC Symbol;Acc:HGNC:27375]
PSTPIP2	28	0.00441	0.154	2.49	2.49	6.87	2.76	ENSG00000152229	9050	proline-serine-threonine phosphatase interacting protein 2 [Source:HGNC Symbol;Acc:HGNC:9581]
LRRN2	69.5	0.0167	0.243	2.48	2.48	14.4	5.79	ENSG00000170382	10446	leucine rich repeat neuronal 2 [Source:HGNC Symbol;Acc:HGNC:16914]
AKR1C2	6.56	0.0494	0.366	2.47	2.47	1.36	0.553	ENSG00000151632	1646	aldo-keto reductase family 1 member C2 [Source:HGNC Symbol;Acc:HGNC:385]
GRIK2	24.7	0.035	0.324	2.47	2.47	4.47	1.81	ENSG00000164418	2898	glutamate ionotropic receptor kainate type subunit 2 [Source:HGNC Symbol;Acc:HGNC:4580]
IL17RD	1140	0.0237	0.279	2.47	2.47	315	128	ENSG00000144730	54756	interleukin 17 receptor D [Source:HGNC Symbol;Acc:HGNC:17616]
LINC01003	20	0.0371	0.328	2.47	2.47	3.76	1.52	ENSG00000261455	NA	long intergenic non-protein coding RNA 1003 [Source:HGNC Symbol;Acc:HGNC:48957]
PPP1R14C	41.8	0.00837	0.189	2.47	2.47	5.24	2.12	ENSG00000198729	81706	protein phosphatase 1 regulatory inhibitor subunit 14C [Source:HGNC Symbol;Acc:HGNC:14952]
TANC2	297	0.000651	0.0789	2.47	2.47	56.5	22.9	ENSG00000170921	26115	tetratricopeptide repeat, ankyrin repeat and coiled-coil containing 2 [Source:HGNC Symbol;Acc:HGNC:30212]
UBXN10	21.9	0.0111	0.211	2.47	2.47	5.07	2.05	ENSG00000162543	127733	UBX domain protein 10 [Source:HGNC Symbol;Acc:HGNC:26354]
JAKMIP2	171	0.00399	0.148	2.46	2.46	29.2	11.9	ENSG00000176049	9832	janus kinase and microtubule interacting protein 2 [Source:HGNC Symbol;Acc:HGNC:29067]
MEIS2	462	0.0144	0.232	2.46	2.46	107	43.7	ENSG00000134138	4212	Meis homeobox 2 [Source:HGNC Symbol;Acc:HGNC:7001]
MTUS2	53.7	0.0276	0.295	2.46	2.46	4.6	1.87	ENSG00000132938	23281	microtubule associated scaffold protein 2 [Source:HGNC Symbol;Acc:HGNC:20595]
PDZD4	78.4	0.00256	0.126	2.46	2.46	14.6	5.93	ENSG00000067840	57595	PDZ domain containing 4 [Source:HGNC Symbol;Acc:HGNC:21167]
SUSD1	47.2	0.0021	0.117	2.46	2.46	10.7	4.36	ENSG00000106868	64420	sushi domain containing 1 [Source:HGNC Symbol;Acc:HGNC:25413]
ADAMTS10	38.1	0.0172	0.248	2.45	2.45	7.46	3.05	ENSG00000142303	81794	ADAM metallopeptidase with thrombospondin type 1 motif 10 [Source:HGNC Symbol;Acc:HGNC:13201]
CORO2A	323	7.92e-05	0.0521	2.45	2.45	37	15.1	ENSG00000106789	7464	coronin 2A [Source:HGNC Symbol;Acc:HGNC:2255]
FAM110D	26.7	0.0245	0.281	2.45	2.45	4.46	1.82	ENSG00000197245	79927	family with sequence similarity 110 member D [Source:HGNC Symbol;Acc:HGNC:25860]
POF1B	19.2	0.0315	0.31	2.45	2.45	5.76	2.36	ENSG00000124429	79983	POF1B actin binding protein [Source:HGNC Symbol;Acc:HGNC:13711]
RFPL1S	12.1	0.046	0.353	2.45	2.45	2	0.815	ENSG00000225465	NA	RFPL1 antisense RNA 1 [Source:HGNC Symbol;Acc:HGNC:9978]
SORCS3	7.89	0.0429	0.343	2.45	2.45	1.44	0.588	ENSG00000156395	22986	sortilin related VPS10 domain containing receptor 3 [Source:HGNC Symbol;Acc:HGNC:16699]
TNNC2	22.5	0.0481	0.361	2.45	2.45	1.02	0.416	ENSG00000101470	7125	troponin C2, fast skeletal type [Source:HGNC Symbol;Acc:HGNC:11944]
PCBP4	781	0.0109	0.209	2.44	2.44	92.4	37.9	ENSG00000090097	57060	poly(rC) binding protein 4 [Source:HGNC Symbol;Acc:HGNC:8652]
SPSB4	403	0.00989	0.202	2.42	2.42	69	28.5	ENSG00000175093	92369	splA/ryanodine receptor domain and SOCS box containing 4 [Source:HGNC Symbol;Acc:HGNC:30630]
BAALC-AS1	22.7	0.0146	0.233	2.41	2.41	5.54	2.3	ENSG00000247081	NA	BAALC antisense RNA 1 [Source:HGNC Symbol;Acc:HGNC:50461]
TRIM69	28.6	0.00512	0.159	2.41	2.41	4.92	2.04	ENSG00000278211	140691	tripartite motif containing 69 [Source:HGNC Symbol;Acc:HGNC:17857]
TRIM69	28.6	0.00512	0.159	2.41	2.41	4.92	2.04	ENSG00000185880	140691	tripartite motif containing 69 [Source:HGNC Symbol;Acc:HGNC:17857]
ALOX12P2	3.7	0.0488	0.364	2.4	2.4	0.747	0.311	ENSG00000262943	NA	arachidonate 12-lipoxygenase pseudogene 2 [Source:HGNC Symbol;Acc:HGNC:432]
DPF1	31	0.0121	0.217	2.4	2.4	5.68	2.37	ENSG00000011332	8193	double PHD fingers 1 [Source:HGNC Symbol;Acc:HGNC:20225]
FAT4	81.8	0.0415	0.339	2.4	2.4	17.1	7.13	ENSG00000196159	79633	FAT atypical cadherin 4 [Source:HGNC Symbol;Acc:HGNC:23109]
LMCD1	50.3	0.0157	0.237	2.4	2.4	11.1	4.61	ENSG00000071282	29995	LIM and cysteine rich domains 1 [Source:HGNC Symbol;Acc:HGNC:6633]
SLITRK6	52.8	0.0215	0.269	2.4	2.4	15.1	6.26	ENSG00000184564	84189	SLIT and NTRK like family member 6 [Source:HGNC Symbol;Acc:HGNC:23503]
CNR1	28	0.0143	0.231	2.39	2.39	4.15	1.74	ENSG00000118432	1268	cannabinoid receptor 1 [Source:HGNC Symbol;Acc:HGNC:2159]
FAM217B	313	0.000206	0.0594	2.39	2.39	59.9	25.1	ENSG00000196227	63939	family with sequence similarity 217 member B [Source:HGNC Symbol;Acc:HGNC:16170]
SLC1A4	47.4	0.0119	0.217	2.39	2.39	9.51	3.98	ENSG00000115902	6509	solute carrier family 1 member 4 [Source:HGNC Symbol;Acc:HGNC:10942]
SOSTDC1	22.3	0.00827	0.189	2.39	2.39	5.79	2.42	ENSG00000171243	25928	sclerostin domain containing 1 [Source:HGNC Symbol;Acc:HGNC:21748]
PTCHD4	21.7	0.015	0.235	2.38	2.38	6.84	2.88	ENSG00000244694	442213	patched domain containing 4 [Source:HGNC Symbol;Acc:HGNC:21345]
QRICH2	52.7	0.00488	0.157	2.38	2.38	9.55	4	ENSG00000129646	84074	glutamine rich 2 [Source:HGNC Symbol;Acc:HGNC:25326]
WNT5A	120	0.0222	0.272	2.38	2.38	25.5	10.7	ENSG00000114251	7474	Wnt family member 5A [Source:HGNC Symbol;Acc:HGNC:12784]
C5	63.2	0.00205	0.116	2.37	2.37	13.2	5.57	ENSG00000106804	727	complement C5 [Source:HGNC Symbol;Acc:HGNC:1331]
MORC4	44.5	0.00557	0.165	2.37	2.37	9.17	3.86	ENSG00000133131	79710	MORC family CW-type zinc finger 4 [Source:HGNC Symbol;Acc:HGNC:23485]
KCNJ4	22.1	0.0362	0.327	2.36	2.36	3.08	1.31	ENSG00000168135	3761	potassium inwardly rectifying channel subfamily J member 4 [Source:HGNC Symbol;Acc:HGNC:6265]
PCLO	58	0.0148	0.234	2.36	2.36	12.6	5.33	ENSG00000186472	27445	piccolo presynaptic cytomatrix protein [Source:HGNC Symbol;Acc:HGNC:13406]
WFIKKN1	186	0.00401	0.148	2.36	2.36	39.9	16.9	ENSG00000127578	117166	WAP, follistatin/kazal, immunoglobulin, kunitz and netrin domain containing 1 [Source:HGNC Symbol;Acc:HGNC:30912]
KCNAB1	15.7	0.0281	0.297	2.35	2.35	3.97	1.69	ENSG00000169282	7881	potassium voltage-gated channel subfamily A member regulatory beta subunit 1 [Source:HGNC Symbol;Acc:HGNC:6228]
METRN	302	0.00611	0.17	2.35	2.35	62.2	26.5	ENSG00000103260	79006	meteorin, glial cell differentiation regulator [Source:HGNC Symbol;Acc:HGNC:14151]
MYORG	61.6	0.0275	0.295	2.35	2.35	12.5	5.31	ENSG00000164976	57462	myogenesis regulating glycosidase (putative) [Source:HGNC Symbol;Acc:HGNC:19918]
SEMA5A	365	0.0279	0.296	2.35	2.35	102	43.4	ENSG00000112902	9037	semaphorin 5A [Source:HGNC Symbol;Acc:HGNC:10736]
SLC8A1	46.3	0.00751	0.184	2.35	2.35	10.3	4.38	ENSG00000183023	6546	solute carrier family 8 member A1 [Source:HGNC Symbol;Acc:HGNC:11068]
TMEM215	5.42	0.0433	0.344	2.35	2.35	1.11	0.474	ENSG00000188133	401498	transmembrane protein 215 [Source:HGNC Symbol;Acc:HGNC:33816]
DNAJC1	168	0.00834	0.189	2.34	2.34	38.1	16.3	ENSG00000136770	64215	DnaJ heat shock protein family (Hsp40) member C1 [Source:HGNC Symbol;Acc:HGNC:20090]
NEURL1	8.83	0.0398	0.337	2.34	2.34	1.91	0.818	ENSG00000107954	9148	neuralized E3 ubiquitin protein ligase 1 [Source:HGNC Symbol;Acc:HGNC:7761]
PLAAT1	8.42	0.0215	0.269	2.34	2.34	2.07	0.882	ENSG00000127252	57110	phospholipase A and acyltransferase 1 [Source:HGNC Symbol;Acc:HGNC:14922]
TES	190	0.00567	0.166	2.34	2.34	48.6	20.7	ENSG00000135269	26136	testin LIM domain protein [Source:HGNC Symbol;Acc:HGNC:14620]
MAMDC2	32.2	0.00993	0.202	2.33	2.33	6.5	2.79	ENSG00000165072	256691	MAM domain containing 2 [Source:HGNC Symbol;Acc:HGNC:23673]
MAMDC2	32.2	0.00993	0.202	2.33	2.33	6.5	2.79	ENSG00000278608	256691	MAM domain containing 2 [Source:HGNC Symbol;Acc:HGNC:23673]
UBASH3B	46.4	0.0328	0.314	2.33	2.33	12.1	5.2	ENSG00000154127	84959	ubiquitin associated and SH3 domain containing B [Source:HGNC Symbol;Acc:HGNC:29884]
LAMP5	31.9	0.0128	0.222	2.32	2.32	4.78	2.06	ENSG00000125869	24141	lysosomal associated membrane protein family member 5 [Source:HGNC Symbol;Acc:HGNC:16097]
RGS10	82	0.00609	0.17	2.32	2.32	10.7	4.61	ENSG00000148908	6001	regulator of G protein signaling 10 [Source:HGNC Symbol;Acc:HGNC:9992]
WWTR1	186	0.000918	0.0882	2.32	2.32	38.7	16.7	ENSG00000018408	25937	WW domain containing transcription regulator 1 [Source:HGNC Symbol;Acc:HGNC:24042]
PARVA	266	0.000909	0.0882	2.31	2.31	58.2	25.1	ENSG00000197702	55742	parvin alpha [Source:HGNC Symbol;Acc:HGNC:14652]
RND3	210	0.00172	0.109	2.31	2.31	41.7	18	ENSG00000115963	390	Rho family GTPase 3 [Source:HGNC Symbol;Acc:HGNC:671]
ABAT	108	0.00268	0.128	2.29	2.29	19.5	8.53	ENSG00000183044	18	4-aminobutyrate aminotransferase [Source:HGNC Symbol;Acc:HGNC:23]
ARHGEF38	45.7	0.0277	0.295	2.29	2.29	13.2	5.77	ENSG00000236699	54848	Rho guanine nucleotide exchange factor 38 [Source:HGNC Symbol;Acc:HGNC:25968]
LINC00641	137	0.000358	0.0678	2.29	2.29	22.6	9.88	ENSG00000258441	NA	long intergenic non-protein coding RNA 641 [Source:HGNC Symbol;Acc:HGNC:27511]
LRRC8C-DT	10.5	0.0176	0.251	2.29	2.29	2.37	1.04	ENSG00000231999	NA	LRRC8C divergent transcript [Source:HGNC Symbol;Acc:HGNC:53731]
ADPRHL1	14.4	0.0163	0.242	2.28	2.28	2.34	1.03	ENSG00000153531	113622	ADP-ribosylhydrolase like 1 [Source:HGNC Symbol;Acc:HGNC:21303]
ARSD	111	0.00253	0.126	2.28	2.28	26.8	11.8	ENSG00000006756	414	arylsulfatase D [Source:HGNC Symbol;Acc:HGNC:717]
CEP85L	148	0.0051	0.159	2.28	2.28	20.1	8.83	ENSG00000111860	387119	centrosomal protein 85 like [Source:HGNC Symbol;Acc:HGNC:21638]
CNOT6L	94.7	0.00735	0.184	2.28	2.28	22.1	9.69	ENSG00000138767	246175	CCR4-NOT transcription complex subunit 6 like [Source:HGNC Symbol;Acc:HGNC:18042]
DLL3	63.1	0.0126	0.221	2.28	2.28	3.95	1.73	ENSG00000090932	10683	delta like canonical Notch ligand 3 [Source:HGNC Symbol;Acc:HGNC:2909]
RAB36	62	0.00708	0.181	2.28	2.28	12.8	5.6	ENSG00000100228	9609	RAB36, member RAS oncogene family [Source:HGNC Symbol;Acc:HGNC:9775]
FAM181B	13	0.0375	0.329	2.27	2.27	3.02	1.33	ENSG00000182103	220382	family with sequence similarity 181 member B [Source:HGNC Symbol;Acc:HGNC:28512]
PIEZO2	164	0.00094	0.0889	2.27	2.27	29.7	13.1	ENSG00000154864	63895	piezo type mechanosensitive ion channel component 2 [Source:HGNC Symbol;Acc:HGNC:26270]
STARD5	47.4	0.0244	0.281	2.27	2.27	8.7	3.83	ENSG00000172345	80765	StAR related lipid transfer domain containing 5 [Source:HGNC Symbol;Acc:HGNC:18065]
GDF1	21.2	0.014	0.229	2.26	2.26	6.33	2.8	ENSG00000130283	2657	growth differentiation factor 1 [Source:HGNC Symbol;Acc:HGNC:4214]
MPPED2	50.3	0.00352	0.141	2.26	2.26	13	5.75	ENSG00000066382	744	metallophosphoesterase domain containing 2 [Source:HGNC Symbol;Acc:HGNC:1180]
SRRM4	181	0.0108	0.209	2.26	2.26	14.7	6.49	ENSG00000139767	84530	serine/arginine repetitive matrix 4 [Source:HGNC Symbol;Acc:HGNC:29389]
FN1	947	0.00557	0.165	2.25	2.25	198	87.9	ENSG00000115414	2335	fibronectin 1 [Source:HGNC Symbol;Acc:HGNC:3778]
KLHL29	77.2	0.00449	0.154	2.25	2.25	11.2	4.98	ENSG00000119771	114818	kelch like family member 29 [Source:HGNC Symbol;Acc:HGNC:29404]
VEGFC	31.9	0.0246	0.282	2.25	2.25	9.48	4.21	ENSG00000150630	7424	vascular endothelial growth factor C [Source:HGNC Symbol;Acc:HGNC:12682]
KCNC1	78.9	0.0215	0.269	2.24	2.24	14.5	6.45	ENSG00000129159	3746	potassium voltage-gated channel subfamily C member 1 [Source:HGNC Symbol;Acc:HGNC:6233]
NUP62CL	30.6	0.0226	0.273	2.24	2.24	7.16	3.2	ENSG00000198088	54830	nucleoporin 62 C-terminal like [Source:HGNC Symbol;Acc:HGNC:25960]
OSMR	15.1	0.0432	0.344	2.24	2.24	1.58	0.707	ENSG00000145623	9180	oncostatin M receptor [Source:HGNC Symbol;Acc:HGNC:8507]
SLC2A11	52.7	0.034	0.319	2.24	2.24	11.7	5.22	ENSG00000275744	66035	solute carrier family 2 member 11 [Source:HGNC Symbol;Acc:HGNC:14239]
SLC2A11	52.7	0.034	0.319	2.24	2.24	11.7	5.22	ENSG00000133460	66035	solute carrier family 2 member 11 [Source:HGNC Symbol;Acc:HGNC:14239]
KCNA1	28.9	0.0228	0.275	2.23	2.23	2.7	1.21	ENSG00000111262	3736	potassium voltage-gated channel subfamily A member 1 [Source:HGNC Symbol;Acc:HGNC:6218]
PLCL1	22.3	0.0432	0.344	2.23	2.23	4.15	1.86	ENSG00000115896	5334	phospholipase C like 1 (inactive) [Source:HGNC Symbol;Acc:HGNC:9063]
TMEM151B	50.3	0.00603	0.17	2.23	2.23	11.6	5.22	ENSG00000178233	441151	transmembrane protein 151B [Source:HGNC Symbol;Acc:HGNC:21315]
S100A10	60.9	0.0224	0.273	2.22	2.22	7.17	3.23	ENSG00000197747	6281	S100 calcium binding protein A10 [Source:HGNC Symbol;Acc:HGNC:10487]
CHRNA4	44.7	0.0216	0.269	2.21	2.21	3.28	1.48	ENSG00000101204	1137	cholinergic receptor nicotinic alpha 4 subunit [Source:HGNC Symbol;Acc:HGNC:1958]
GSTM3	21.7	0.0189	0.258	2.21	2.21	3.8	1.72	ENSG00000134202	2947	glutathione S-transferase mu 3 [Source:HGNC Symbol;Acc:HGNC:4635]
MBNL2	74.5	0.00252	0.126	2.21	2.21	16.9	7.66	ENSG00000139793	10150	muscleblind like splicing regulator 2 [Source:HGNC Symbol;Acc:HGNC:16746]
ACKR3	58.2	0.0364	0.327	2.2	2.2	13.6	6.17	ENSG00000144476	57007	atypical chemokine receptor 3 [Source:HGNC Symbol;Acc:HGNC:23692]
FAM210B	425	0.000638	0.0789	2.2	2.2	89	40.4	ENSG00000124098	116151	family with sequence similarity 210 member B [Source:HGNC Symbol;Acc:HGNC:16102]
NEK11	29.2	0.0126	0.221	2.2	2.2	6.52	2.96	ENSG00000114670	79858	NIMA related kinase 11 [Source:HGNC Symbol;Acc:HGNC:18593]
TMOD2	104	0.0166	0.243	2.2	2.2	15.5	7.01	ENSG00000128872	29767	tropomodulin 2 [Source:HGNC Symbol;Acc:HGNC:11872]
ACOT1	5.41	0.0483	0.362	2.19	2.19	1.4	0.641	ENSG00000184227	641371	acyl-CoA thioesterase 1 [Source:HGNC Symbol;Acc:HGNC:33128]
GPD1L	45	0.00224	0.12	2.19	2.19	7.32	3.34	ENSG00000152642	23171	glycerol-3-phosphate dehydrogenase 1 like [Source:HGNC Symbol;Acc:HGNC:28956]
LGI2	144	0.0187	0.258	2.19	2.19	13.1	5.98	ENSG00000153012	55203	leucine rich repeat LGI family member 2 [Source:HGNC Symbol;Acc:HGNC:18710]
NEFL	399	0.0211	0.267	2.19	2.19	27.6	12.6	ENSG00000277586	4747	neurofilament light [Source:HGNC Symbol;Acc:HGNC:7739]
STARD13	36.8	0.0288	0.3	2.19	2.19	4.93	2.25	ENSG00000133121	90627	StAR related lipid transfer domain containing 13 [Source:HGNC Symbol;Acc:HGNC:19164]
VGLL3	259	0.00137	0.101	2.19	2.19	64.6	29.5	ENSG00000206538	389136	vestigial like family member 3 [Source:HGNC Symbol;Acc:HGNC:24327]
SEMA4A	13.8	0.0296	0.302	2.18	2.18	3.61	1.66	ENSG00000196189	64218	semaphorin 4A [Source:HGNC Symbol;Acc:HGNC:10729]
SVIP	168	0.00109	0.093	2.18	2.18	30.5	14	ENSG00000198168	258010	small VCP interacting protein [Source:HGNC Symbol;Acc:HGNC:25238]
WDR66	8.6	0.0393	0.336	2.18	2.18	2.49	1.14	ENSG00000158023	144406	WD repeat domain 66 [Source:HGNC Symbol;Acc:HGNC:28506]
C1QL3	16.6	0.0359	0.327	2.17	2.17	1.23	0.568	ENSG00000165985	389941	complement C1q like 3 [Source:HGNC Symbol;Acc:HGNC:19359]
MEIS3P2	26.8	0.0108	0.209	2.17	2.17	5.41	2.49	ENSG00000188013	NA	Meis homeobox 3 pseudogene 2 [Source:HGNC Symbol;Acc:HGNC:17638]
RDH10	64.7	0.0468	0.357	2.17	2.17	15.8	7.28	ENSG00000121039	157506	retinol dehydrogenase 10 [Source:HGNC Symbol;Acc:HGNC:19975]
DNM3	7.79	0.0421	0.341	2.16	2.16	1.19	0.552	ENSG00000197959	26052	dynamin 3 [Source:HGNC Symbol;Acc:HGNC:29125]
SCUBE3	438	0.0198	0.262	2.16	2.16	96.3	44.6	ENSG00000146197	222663	signal peptide, CUB domain and EGF like domain containing 3 [Source:HGNC Symbol;Acc:HGNC:13655]
GLRB	36	0.00334	0.138	2.15	2.15	7.16	3.33	ENSG00000109738	2743	glycine receptor beta [Source:HGNC Symbol;Acc:HGNC:4329]
IGDCC3	2080	0.0049	0.157	2.15	2.15	323	150	ENSG00000174498	9543	immunoglobulin superfamily DCC subclass member 3 [Source:HGNC Symbol;Acc:HGNC:9700]
LPGAT1	117	0.00471	0.157	2.15	2.15	30.7	14.2	ENSG00000123684	9926	lysophosphatidylglycerol acyltransferase 1 [Source:HGNC Symbol;Acc:HGNC:28985]
NRP1	116	0.0105	0.207	2.15	2.15	20.3	9.45	ENSG00000099250	8829	neuropilin 1 [Source:HGNC Symbol;Acc:HGNC:8004]
PYGO1	163	0.00745	0.184	2.15	2.15	34.7	16.1	ENSG00000171016	26108	pygopus family PHD finger 1 [Source:HGNC Symbol;Acc:HGNC:30256]
RIMS1	51.2	0.0251	0.285	2.15	2.15	10.7	5	ENSG00000079841	22999	regulating synaptic membrane exocytosis 1 [Source:HGNC Symbol;Acc:HGNC:17282]
RORB	70.3	0.029	0.301	2.15	2.15	17.4	8.07	ENSG00000198963	6096	RAR related orphan receptor B [Source:HGNC Symbol;Acc:HGNC:10259]
SDCBP2-AS1	16.4	0.0407	0.339	2.15	2.15	3.23	1.5	ENSG00000234684	NA	SDCBP2 antisense RNA 1 [Source:HGNC Symbol;Acc:HGNC:44314]
CPE	904	0.00412	0.149	2.14	2.14	245	115	ENSG00000109472	1363	carboxypeptidase E [Source:HGNC Symbol;Acc:HGNC:2303]
HEY2	49.1	0.03	0.304	2.14	2.14	10.9	5.1	ENSG00000135547	23493	hes related family bHLH transcription factor with YRPW motif 2 [Source:HGNC Symbol;Acc:HGNC:4881]
IQSEC3	19.5	0.0486	0.363	2.14	2.14	2.2	1.03	ENSG00000120645	440073	IQ motif and Sec7 domain ArfGEF 3 [Source:HGNC Symbol;Acc:HGNC:29193]
IQSEC3	19.5	0.0486	0.363	2.14	2.14	2.2	1.03	ENSG00000262607	440073	IQ motif and Sec7 domain ArfGEF 3 [Source:HGNC Symbol;Acc:HGNC:29193]
KLF5	58.9	0.0191	0.259	2.14	2.14	15.7	7.33	ENSG00000102554	688	Kruppel like factor 5 [Source:HGNC Symbol;Acc:HGNC:6349]
LPP	347	0.0257	0.287	2.14	2.14	82	38.3	ENSG00000145012	4026	LIM domain containing preferred translocation partner in lipoma [Source:HGNC Symbol;Acc:HGNC:6679]
MAP1A	390	0.00181	0.11	2.14	2.14	49.1	22.9	ENSG00000166963	4130	microtubule associated protein 1A [Source:HGNC Symbol;Acc:HGNC:6835]
MAP1LC3A	24.7	0.0214	0.268	2.14	2.14	5.18	2.42	ENSG00000101460	84557	microtubule associated protein 1 light chain 3 alpha [Source:HGNC Symbol;Acc:HGNC:6838]
NCKAP5	17.8	0.0291	0.301	2.14	2.14	4.49	2.1	ENSG00000176771	344148	NCK associated protein 5 [Source:HGNC Symbol;Acc:HGNC:29847]
PARD3B	66.6	0.0252	0.285	2.14	2.14	17.4	8.13	ENSG00000116117	117583	par-3 family cell polarity regulator beta [Source:HGNC Symbol;Acc:HGNC:14446]
RAB27A	36.3	0.0123	0.22	2.14	2.14	9.29	4.34	ENSG00000069974	5873	RAB27A, member RAS oncogene family [Source:HGNC Symbol;Acc:HGNC:9766]
BORCS7	91.8	0.00167	0.109	2.13	2.13	18.2	8.55	ENSG00000166275	119032	BLOC-1 related complex subunit 7 [Source:HGNC Symbol;Acc:HGNC:23516]
DYRK4	33.7	0.0113	0.212	2.13	2.13	6.72	3.15	ENSG00000010219	8798	dual specificity tyrosine phosphorylation regulated kinase 4 [Source:HGNC Symbol;Acc:HGNC:3095]
IKZF2	239	0.0107	0.208	2.13	2.13	62.4	29.2	ENSG00000030419	22807	IKAROS family zinc finger 2 [Source:HGNC Symbol;Acc:HGNC:13177]
IL6ST	262	0.00123	0.0976	2.13	2.13	53.7	25.2	ENSG00000134352	3572	interleukin 6 signal transducer [Source:HGNC Symbol;Acc:HGNC:6021]
ISYNA1	1200	0.00289	0.13	2.13	2.13	272	128	ENSG00000105655	51477	inositol-3-phosphate synthase 1 [Source:HGNC Symbol;Acc:HGNC:29821]
PLXNA4	82.9	0.0367	0.328	2.13	2.13	20.3	9.57	ENSG00000221866	91584	plexin A4 [Source:HGNC Symbol;Acc:HGNC:9102]
TMEM44-AS1	8.19	0.0478	0.361	2.13	2.13	1.48	0.693	ENSG00000231770	NA	TMEM44 antisense RNA 1 [Source:HGNC Symbol;Acc:HGNC:44272]
TUBB3	2020	0.00866	0.192	2.13	2.13	183	85.7	ENSG00000258947	10381	tubulin beta 3 class III [Source:HGNC Symbol;Acc:HGNC:20772]
ZNF726	39	0.00748	0.184	2.13	2.13	7.43	3.48	ENSG00000213967	730087	zinc finger protein 726 [Source:HGNC Symbol;Acc:HGNC:32462]
ANTXR1	479	0.00117	0.0956	2.12	2.12	107	50.4	ENSG00000169604	84168	ANTXR cell adhesion molecule 1 [Source:HGNC Symbol;Acc:HGNC:21014]
BCHE	50	0.00731	0.184	2.12	2.12	6.7	3.16	ENSG00000114200	590	butyrylcholinesterase [Source:HGNC Symbol;Acc:HGNC:983]
CREB3L2	631	0.00167	0.109	2.12	2.12	129	60.7	ENSG00000182158	64764	cAMP responsive element binding protein 3 like 2 [Source:HGNC Symbol;Acc:HGNC:23720]
FNIP2	210	0.00464	0.156	2.12	2.12	43.2	20.4	ENSG00000052795	57600	folliculin interacting protein 2 [Source:HGNC Symbol;Acc:HGNC:29280]
GALNT16	134	0.00981	0.202	2.12	2.12	16.5	7.77	ENSG00000100626	57452	polypeptide N-acetylgalactosaminyltransferase 16 [Source:HGNC Symbol;Acc:HGNC:23233]
INSYN1-AS1	15.2	0.0289	0.301	2.12	2.12	1.9	0.896	ENSG00000260469	NA	INSYN1 antisense RNA 1 [Source:HGNC Symbol;Acc:HGNC:51422]
NEDD4	78.3	0.0126	0.221	2.12	2.12	14.2	6.67	ENSG00000069869	4734	NEDD4 E3 ubiquitin protein ligase [Source:HGNC Symbol;Acc:HGNC:7727]
DAGLA	64.4	0.00899	0.195	2.11	2.11	13.2	6.24	ENSG00000134780	747	diacylglycerol lipase alpha [Source:HGNC Symbol;Acc:HGNC:1165]
MERTK	72.1	0.0242	0.281	2.11	2.11	17.6	8.32	ENSG00000153208	10461	MER proto-oncogene, tyrosine kinase [Source:HGNC Symbol;Acc:HGNC:7027]
RELN	134	0.00273	0.128	2.11	2.11	9.54	4.52	ENSG00000189056	5649	reelin [Source:HGNC Symbol;Acc:HGNC:9957]
RPL23AP53	7.74	0.0451	0.349	2.11	2.11	1.78	0.841	ENSG00000223508	NA	ribosomal protein L23a pseudogene 53 [Source:HGNC Symbol;Acc:HGNC:35921]
STXBP5L	20.5	0.0222	0.272	2.11	2.11	3.11	1.47	ENSG00000145087	9515	syntaxin binding protein 5 like [Source:HGNC Symbol;Acc:HGNC:30757]
TSC22D3	110	0.00434	0.153	2.11	2.11	23	10.9	ENSG00000157514	1831	TSC22 domain family member 3 [Source:HGNC Symbol;Acc:HGNC:3051]
ZNF790-AS1	7.45	0.0488	0.364	2.11	2.11	2.04	0.97	ENSG00000267254	NA	ZNF790 antisense RNA 1 [Source:HGNC Symbol;Acc:HGNC:27617]
ATP10D	65.5	0.00178	0.11	2.1	2.1	15.1	7.16	ENSG00000145246	57205	ATPase phospholipid transporting 10D (putative) [Source:HGNC Symbol;Acc:HGNC:13549]
FBXL17	78.2	0.00172	0.109	2.1	2.1	15.3	7.26	ENSG00000145743	64839	F-box and leucine rich repeat protein 17 [Source:HGNC Symbol;Acc:HGNC:13615]
DUBR	62.5	0.012	0.217	2.09	2.09	10.8	5.19	ENSG00000243701	NA	DPPA2 upstream binding RNA [Source:HGNC Symbol;Acc:HGNC:48569]
LRRC37A3	32.7	0.00767	0.184	2.09	2.09	6.7	3.21	ENSG00000275621	374819	leucine rich repeat containing 37 member A3 [Source:HGNC Symbol;Acc:HGNC:32427]
LRRC37A3	32.7	0.00767	0.184	2.09	2.09	6.7	3.21	ENSG00000176809	374819	leucine rich repeat containing 37 member A3 [Source:HGNC Symbol;Acc:HGNC:32427]
SPACA9	22.1	0.0112	0.212	2.09	2.09	4.76	2.28	ENSG00000165698	11092	sperm acrosome associated 9 [Source:HGNC Symbol;Acc:HGNC:1367]
ST8SIA3	64.9	0.0142	0.231	2.09	2.09	10.6	5.06	ENSG00000177511	51046	ST8 alpha-N-acetyl-neuraminide alpha-2,8-sialyltransferase 3 [Source:HGNC Symbol;Acc:HGNC:14269]
PPARA	86.6	0.0214	0.268	2.08	2.08	18.4	8.84	ENSG00000186951	5465	peroxisome proliferator activated receptor alpha [Source:HGNC Symbol;Acc:HGNC:9232]
THEM6	31.8	0.00923	0.199	2.08	2.08	7.32	3.51	ENSG00000130193	51337	thioesterase superfamily member 6 [Source:HGNC Symbol;Acc:HGNC:29656]
ENPEP	22.4	0.0325	0.313	2.07	2.07	4.03	1.95	ENSG00000138792	2028	glutamyl aminopeptidase [Source:HGNC Symbol;Acc:HGNC:3355]
EPS8L2	95.3	0.0306	0.306	2.07	2.07	26.6	12.9	ENSG00000177106	64787	EPS8 like 2 [Source:HGNC Symbol;Acc:HGNC:21296]
NEDD9	184	0.0149	0.235	2.07	2.07	40.1	19.3	ENSG00000111859	4739	neural precursor cell expressed, developmentally down-regulated 9 [Source:HGNC Symbol;Acc:HGNC:7733]
NKD1	318	0.0413	0.339	2.07	2.07	46.2	22.3	ENSG00000140807	85407	NKD inhibitor of WNT signaling pathway 1 [Source:HGNC Symbol;Acc:HGNC:17045]
OPCML	127	0.00255	0.126	2.07	2.07	31	15	ENSG00000183715	4978	opioid binding protein/cell adhesion molecule like [Source:HGNC Symbol;Acc:HGNC:8143]
PSMG3-AS1	56.7	0.0069	0.179	2.07	2.07	10.8	5.21	ENSG00000230487	NA	PSMG3 antisense RNA 1 (head to head) [Source:HGNC Symbol;Acc:HGNC:22230]
SPATS2L	180	0.0341	0.32	2.07	2.07	43.6	21	ENSG00000196141	26010	spermatogenesis associated serine rich 2 like [Source:HGNC Symbol;Acc:HGNC:24574]
SULF2	522	0.00824	0.189	2.07	2.07	134	64.8	ENSG00000196562	55959	sulfatase 2 [Source:HGNC Symbol;Acc:HGNC:20392]
ID1	525	0.019	0.258	2.06	2.06	138	67	ENSG00000125968	3397	inhibitor of DNA binding 1, HLH protein [Source:HGNC Symbol;Acc:HGNC:5360]
MAML2	113	0.0183	0.256	2.06	2.06	22.6	11	ENSG00000184384	84441	mastermind like transcriptional coactivator 2 [Source:HGNC Symbol;Acc:HGNC:16259]
TGM2	37.9	0.0195	0.261	2.06	2.06	4.15	2.01	ENSG00000198959	7052	transglutaminase 2 [Source:HGNC Symbol;Acc:HGNC:11778]
ZNF704	306	0.000708	0.0805	2.06	2.06	60.6	29.5	ENSG00000164684	619279	zinc finger protein 704 [Source:HGNC Symbol;Acc:HGNC:32291]
DTX4	943	0.00221	0.12	2.05	2.05	160	78.2	ENSG00000110042	23220	deltex E3 ubiquitin ligase 4 [Source:HGNC Symbol;Acc:HGNC:29151]
FAM114A1	31.2	0.0378	0.331	2.05	2.05	6.71	3.28	ENSG00000197712	92689	family with sequence similarity 114 member A1 [Source:HGNC Symbol;Acc:HGNC:25087]
MTSS1	151	0.00126	0.0989	2.05	2.05	28.2	13.8	ENSG00000170873	9788	MTSS I-BAR domain containing 1 [Source:HGNC Symbol;Acc:HGNC:20443]
TCEAL5	105	0.00098	0.0892	2.05	2.05	19.2	9.33	ENSG00000204065	340543	transcription elongation factor A like 5 [Source:HGNC Symbol;Acc:HGNC:22282]
ZHX1	200	0.0018	0.11	2.05	2.05	35	17.1	ENSG00000165156	11244	zinc fingers and homeoboxes 1 [Source:HGNC Symbol;Acc:HGNC:12871]
CLVS1	38.6	0.0121	0.218	2.04	2.04	6.41	3.14	ENSG00000177182	157807	clavesin 1 [Source:HGNC Symbol;Acc:HGNC:23139]
LBH	93.2	0.00102	0.091	2.04	2.04	20.9	10.2	ENSG00000213626	81606	LBH regulator of WNT signaling pathway [Source:HGNC Symbol;Acc:HGNC:29532]
ZDHHC1	17.9	0.015	0.235	2.04	2.04	3.66	1.79	ENSG00000159714	29800	zinc finger DHHC-type containing 1 [Source:HGNC Symbol;Acc:HGNC:17916]
IQCA1	52.3	0.0441	0.346	2.03	2.03	12.5	6.19	ENSG00000132321	79781	IQ motif containing with AAA domain 1 [Source:HGNC Symbol;Acc:HGNC:26195]
LINC00963	18.9	0.0202	0.265	2.03	2.03	4.27	2.11	ENSG00000204054	NA	long intergenic non-protein coding RNA 963 [Source:HGNC Symbol;Acc:HGNC:48716]
PCDHGA11	18	0.0426	0.342	2.03	2.03	5.82	2.87	ENSG00000253873	56105	protocadherin gamma subfamily A, 11 [Source:HGNC Symbol;Acc:HGNC:8698]
GNG11	22.1	0.0334	0.317	2.02	2.02	4.26	2.11	ENSG00000127920	2791	G protein subunit gamma 11 [Source:HGNC Symbol;Acc:HGNC:4403]
MBNL1	96.2	0.00444	0.154	2.02	2.02	18.5	9.15	ENSG00000152601	4154	muscleblind like splicing regulator 1 [Source:HGNC Symbol;Acc:HGNC:6923]
NFAT5	242	0.00592	0.169	2.02	2.02	56.4	27.9	ENSG00000102908	10725	nuclear factor of activated T cells 5 [Source:HGNC Symbol;Acc:HGNC:7774]
OPN3	235	0.000294	0.0616	2.02	2.02	45.6	22.6	ENSG00000054277	23596	opsin 3 [Source:HGNC Symbol;Acc:HGNC:14007]
RAB9B	31.1	0.0153	0.236	2.02	2.02	4.59	2.27	ENSG00000123570	51209	RAB9B, member RAS oncogene family [Source:HGNC Symbol;Acc:HGNC:14090]
RAI14	646	0.000111	0.0571	2.02	2.02	115	57.1	ENSG00000039560	26064	retinoic acid induced 14 [Source:HGNC Symbol;Acc:HGNC:14873]
FAR2	109	0.0107	0.208	2.01	2.01	22.7	11.3	ENSG00000064763	55711	fatty acyl-CoA reductase 2 [Source:HGNC Symbol;Acc:HGNC:25531]
FER	244	0.00604	0.17	2.01	2.01	47	23.3	ENSG00000151422	2241	FER tyrosine kinase [Source:HGNC Symbol;Acc:HGNC:3655]
MSRA	22	0.0254	0.286	2.01	2.01	4.16	2.07	ENSG00000175806	4482	methionine sulfoxide reductase A [Source:HGNC Symbol;Acc:HGNC:7377]
MSRA	22	0.0254	0.286	2.01	2.01	4.16	2.07	ENSG00000285250	4482	methionine sulfoxide reductase A [Source:HGNC Symbol;Acc:HGNC:7377]
NOTCH2NLC	39.8	0.0421	0.341	2.01	2.01	9.39	4.67	ENSG00000286219	100996717	notch 2 N-terminal like C [Source:HGNC Symbol;Acc:HGNC:53924]
PLCXD3	15.6	0.0292	0.301	2.01	2.01	1.75	0.873	ENSG00000182836	345557	phosphatidylinositol specific phospholipase C X domain containing 3 [Source:HGNC Symbol;Acc:HGNC:31822]
ALDH5A1	79.3	0.00555	0.165	2	2	17.6	8.79	ENSG00000112294	7915	aldehyde dehydrogenase 5 family member A1 [Source:HGNC Symbol;Acc:HGNC:408]
TOM1L2	98.2	0.0111	0.211	2	2	18.8	9.38	ENSG00000175662	146691	target of myb1 like 2 membrane trafficking protein [Source:HGNC Symbol;Acc:HGNC:11984]
UTRN	439	0.0209	0.267	2	2	97.9	48.9	ENSG00000152818	7402	utrophin [Source:HGNC Symbol;Acc:HGNC:12635]
PDIA5	45.7	0.0136	0.227	0.499	-2	6.16	12.3	ENSG00000065485	10954	protein disulfide isomerase family A member 5 [Source:HGNC Symbol;Acc:HGNC:24811]
CAMKMT	64.1	0.00883	0.194	0.498	-2.01	8.49	17	ENSG00000143919	79823	calmodulin-lysine N-methyltransferase [Source:HGNC Symbol;Acc:HGNC:26276]
NTRK3	65.2	0.00863	0.192	0.496	-2.01	6.59	13.3	ENSG00000140538	4916	neurotrophic receptor tyrosine kinase 3 [Source:HGNC Symbol;Acc:HGNC:8033]
PIEZO1	87.1	0.0128	0.222	0.497	-2.01	13.7	27.5	ENSG00000103335	9780	piezo type mechanosensitive ion channel component 1 [Source:HGNC Symbol;Acc:HGNC:28993]
CAVIN3	35.5	0.0178	0.252	0.496	-2.02	3.52	7.09	ENSG00000170955	112464	caveolae associated protein 3 [Source:HGNC Symbol;Acc:HGNC:9400]
FAR2P2	85.4	0.00804	0.189	0.495	-2.02	10.4	21.1	ENSG00000178162	NA	fatty acyl-CoA reductase 2 pseudogene 2 [Source:HGNC Symbol;Acc:HGNC:49279]
LGALS3BP	187	0.0269	0.293	0.495	-2.02	24.2	48.8	ENSG00000108679	3959	galectin 3 binding protein [Source:HGNC Symbol;Acc:HGNC:6564]
SLIT1	299	0.0234	0.277	0.496	-2.02	43.7	88.1	ENSG00000187122	6585	slit guidance ligand 1 [Source:HGNC Symbol;Acc:HGNC:11085]
ENO2	334	0.00421	0.151	0.492	-2.03	36.4	73.9	ENSG00000111674	2026	enolase 2 [Source:HGNC Symbol;Acc:HGNC:3353]
GNAO1	122	0.00135	0.101	0.494	-2.03	13.5	27.4	ENSG00000087258	2775	G protein subunit alpha o1 [Source:HGNC Symbol;Acc:HGNC:4389]
SOX2	2370	0.0228	0.275	0.493	-2.03	333	676	ENSG00000181449	6657	SRY-box transcription factor 2 [Source:HGNC Symbol;Acc:HGNC:11195]
DLGAP1	128	0.00835	0.189	0.489	-2.04	15	30.7	ENSG00000170579	9229	DLG associated protein 1 [Source:HGNC Symbol;Acc:HGNC:2905]
FAM47E	11.7	0.0303	0.305	0.49	-2.04	1.41	2.87	ENSG00000189157	100129583	family with sequence similarity 47 member E [Source:HGNC Symbol;Acc:HGNC:34343]
PAX8-AS1	37.8	0.0432	0.344	0.49	-2.04	0.675	1.38	ENSG00000189223	NA	PAX8 antisense RNA 1 [Source:HGNC Symbol;Acc:HGNC:49271]
SCX	9.92	0.0352	0.324	0.49	-2.04	1.21	2.47	ENSG00000260428	642658	scleraxis bHLH transcription factor [Source:HGNC Symbol;Acc:HGNC:32322]
PRODH	103	0.00127	0.0993	0.487	-2.05	15.2	31.2	ENSG00000100033	5625	proline dehydrogenase 1 [Source:HGNC Symbol;Acc:HGNC:9453]
GNPNAT1	457	0.0098	0.202	0.486	-2.06	59.1	121	ENSG00000100522	64841	glucosamine-phosphate N-acetyltransferase 1 [Source:HGNC Symbol;Acc:HGNC:19980]
ATP1B1	371	0.00131	0.101	0.48	-2.08	43.8	91.1	ENSG00000143153	481	ATPase Na+/K+ transporting subunit beta 1 [Source:HGNC Symbol;Acc:HGNC:804]
P4HA1	289	0.041	0.339	0.48	-2.08	30.6	63.7	ENSG00000122884	5033	prolyl 4-hydroxylase subunit alpha 1 [Source:HGNC Symbol;Acc:HGNC:8546]
SNX25	71.1	0.025	0.284	0.482	-2.08	8.29	17.2	ENSG00000109762	83891	sorting nexin 25 [Source:HGNC Symbol;Acc:HGNC:21883]
BNIPL	60.8	0.00234	0.122	0.478	-2.09	8.69	18.2	ENSG00000163141	149428	BCL2 interacting protein like [Source:HGNC Symbol;Acc:HGNC:16976]
CTSV	183	0.00171	0.109	0.479	-2.09	25.7	53.6	ENSG00000136943	1515	cathepsin V [Source:HGNC Symbol;Acc:HGNC:2538]
PGGHG	102	0.0236	0.278	0.478	-2.09	14.5	30.3	ENSG00000142102	80162	protein-glucosylgalactosylhydroxylysine glucosidase [Source:HGNC Symbol;Acc:HGNC:26210]
SYNDIG1	16.3	0.0413	0.339	0.477	-2.09	2.01	4.22	ENSG00000101463	79953	synapse differentiation inducing 1 [Source:HGNC Symbol;Acc:HGNC:15885]
TUBB6	168	0.00132	0.101	0.478	-2.09	20.9	43.7	ENSG00000176014	84617	tubulin beta 6 class V [Source:HGNC Symbol;Acc:HGNC:20776]
EGF	15.6	0.035	0.324	0.477	-2.1	1.9	3.98	ENSG00000138798	1950	epidermal growth factor [Source:HGNC Symbol;Acc:HGNC:3229]
GRIK3	45.8	0.0272	0.293	0.477	-2.1	4.19	8.78	ENSG00000163873	2899	glutamate ionotropic receptor kainate type subunit 3 [Source:HGNC Symbol;Acc:HGNC:4581]
LPAR1	120	0.0498	0.366	0.477	-2.1	18	37.8	ENSG00000198121	1902	lysophosphatidic acid receptor 1 [Source:HGNC Symbol;Acc:HGNC:3166]
LRRTM4	32.2	0.0259	0.288	0.476	-2.1	4.16	8.74	ENSG00000176204	80059	leucine rich repeat transmembrane neuronal 4 [Source:HGNC Symbol;Acc:HGNC:19411]
PCDHB15	86.4	0.00324	0.136	0.476	-2.1	12.4	26	ENSG00000113248	56121	protocadherin beta 15 [Source:HGNC Symbol;Acc:HGNC:8686]
HRK	22.8	0.0355	0.325	0.473	-2.11	3.03	6.41	ENSG00000135116	8739	harakiri, BCL2 interacting protein [Source:HGNC Symbol;Acc:HGNC:5185]
HSD17B6	12.5	0.0242	0.281	0.475	-2.11	1.53	3.23	ENSG00000025423	8630	hydroxysteroid 17-beta dehydrogenase 6 [Source:HGNC Symbol;Acc:HGNC:23316]
KYAT1	30.1	0.0218	0.271	0.472	-2.12	3.03	6.42	ENSG00000171097	883	kynurenine aminotransferase 1 [Source:HGNC Symbol;Acc:HGNC:1564]
SFRP1	4010	0.0059	0.169	0.471	-2.12	506	1070	ENSG00000104332	6422	secreted frizzled related protein 1 [Source:HGNC Symbol;Acc:HGNC:10776]
SYT3	20.2	0.0316	0.31	0.472	-2.12	2.57	5.45	ENSG00000213023	84258	synaptotagmin 3 [Source:HGNC Symbol;Acc:HGNC:11511]
CGAS	16.6	0.0248	0.283	0.469	-2.13	2.23	4.75	ENSG00000164430	115004	cyclic GMP-AMP synthase [Source:HGNC Symbol;Acc:HGNC:21367]
GPR19	71.8	0.00287	0.13	0.469	-2.13	8.14	17.4	ENSG00000183150	2842	G protein-coupled receptor 19 [Source:HGNC Symbol;Acc:HGNC:4473]
MTCL1	244	0.000285	0.0616	0.469	-2.13	31	66	ENSG00000168502	23255	microtubule crosslinking factor 1 [Source:HGNC Symbol;Acc:HGNC:29121]
DMKN	103	0.0141	0.229	0.468	-2.14	14.4	30.8	ENSG00000161249	93099	dermokine [Source:HGNC Symbol;Acc:HGNC:25063]
FAM72D	71.3	0.0107	0.208	0.467	-2.14	8.41	18	ENSG00000215784	728833	family with sequence similarity 72 member D [Source:HGNC Symbol;Acc:HGNC:33593]
ZNF385D	34.6	0.0174	0.25	0.467	-2.14	2.91	6.23	ENSG00000151789	79750	zinc finger protein 385D [Source:HGNC Symbol;Acc:HGNC:26191]
ARRDC2	12.3	0.0477	0.361	0.465	-2.15	1.62	3.48	ENSG00000105643	27106	arrestin domain containing 2 [Source:HGNC Symbol;Acc:HGNC:25225]
KCNK10	85	0.0358	0.326	0.465	-2.15	8.39	18	ENSG00000100433	54207	potassium two pore domain channel subfamily K member 10 [Source:HGNC Symbol;Acc:HGNC:6273]
LGALS1	22	0.036	0.327	0.464	-2.15	2.69	5.79	ENSG00000100097	3956	galectin 1 [Source:HGNC Symbol;Acc:HGNC:6561]
SALL1	660	0.0113	0.212	0.465	-2.15	87.8	189	ENSG00000103449	6299	spalt like transcription factor 1 [Source:HGNC Symbol;Acc:HGNC:10524]
CLYBL	47.6	0.024	0.279	0.463	-2.16	5.69	12.3	ENSG00000125246	171425	citrate lyase beta like [Source:HGNC Symbol;Acc:HGNC:18355]
MSANTD3-TMEFF1	548	0.0225	0.273	0.464	-2.16	56.1	121	ENSG00000251349	100526694	MSANTD3-TMEFF1 readthrough [Source:HGNC Symbol;Acc:HGNC:38838]
FNBP1P1	11.4	0.0482	0.362	0.46	-2.17	0.977	2.12	ENSG00000257800	NA	formin binding protein 1 pseudogene 1 [Source:HGNC Symbol;Acc:HGNC:44528]
FOXA3	36.2	0.0149	0.234	0.46	-2.17	5.03	10.9	ENSG00000170608	3171	forkhead box A3 [Source:HGNC Symbol;Acc:HGNC:5023]
HIF3A	85.2	0.00656	0.176	0.46	-2.17	10.9	23.8	ENSG00000124440	64344	hypoxia inducible factor 3 subunit alpha [Source:HGNC Symbol;Acc:HGNC:15825]
ME3	69.6	0.0308	0.307	0.462	-2.17	9.9	21.4	ENSG00000151376	10873	malic enzyme 3 [Source:HGNC Symbol;Acc:HGNC:6985]
PLCE1	59.1	0.00611	0.17	0.461	-2.17	6.92	15	ENSG00000138193	51196	phospholipase C epsilon 1 [Source:HGNC Symbol;Acc:HGNC:17175]
RIMS4	112	0.028	0.296	0.462	-2.17	10.6	23	ENSG00000101098	140730	regulating synaptic membrane exocytosis 4 [Source:HGNC Symbol;Acc:HGNC:16183]
SYNC	150	0.0309	0.307	0.46	-2.17	20.9	45.5	ENSG00000162520	81493	syncoilin, intermediate filament protein [Source:HGNC Symbol;Acc:HGNC:28897]
APOE	1050	0.000688	0.0805	0.459	-2.18	146	319	ENSG00000130203	348	apolipoprotein E [Source:HGNC Symbol;Acc:HGNC:613]
CITED2	1450	0.000332	0.067	0.458	-2.18	177	387	ENSG00000164442	10370	Cbp/p300 interacting transactivator with Glu/Asp rich carboxy-terminal domain 2 [Source:HGNC Symbol;Acc:HGNC:1987]
FAM66D	12.9	0.0232	0.276	0.458	-2.18	1.51	3.29	ENSG00000255052	NA	family with sequence similarity 66 member D [Source:HGNC Symbol;Acc:HGNC:24159]
GPC3	2650	0.036	0.327	0.459	-2.18	288	628	ENSG00000147257	2719	glypican 3 [Source:HGNC Symbol;Acc:HGNC:4451]
PDE4A	38.5	0.00544	0.164	0.459	-2.18	5.12	11.2	ENSG00000065989	5141	phosphodiesterase 4A [Source:HGNC Symbol;Acc:HGNC:8780]
SEMA3G	25.7	0.0379	0.331	0.459	-2.18	2.44	5.31	ENSG00000010319	56920	semaphorin 3G [Source:HGNC Symbol;Acc:HGNC:30400]
DRAXIN	667	8.16e-05	0.0521	0.457	-2.19	80.4	176	ENSG00000162490	374946	dorsal inhibitory axon guidance protein [Source:HGNC Symbol;Acc:HGNC:25054]
GALNT14	14	0.0247	0.282	0.456	-2.19	1.75	3.85	ENSG00000158089	79623	polypeptide N-acetylgalactosaminyltransferase 14 [Source:HGNC Symbol;Acc:HGNC:22946]
IRX1	130	0.0258	0.288	0.458	-2.19	17.3	37.7	ENSG00000170549	79192	iroquois homeobox 1 [Source:HGNC Symbol;Acc:HGNC:14358]
TMEM132B	269	0.00181	0.11	0.458	-2.19	37	81	ENSG00000139364	114795	transmembrane protein 132B [Source:HGNC Symbol;Acc:HGNC:29397]
PAX6	858	0.00259	0.126	0.454	-2.2	84.9	187	ENSG00000007372	5080	paired box 6 [Source:HGNC Symbol;Acc:HGNC:8620]
SH2D5	52.7	0.0122	0.219	0.454	-2.2	4.07	8.95	ENSG00000189410	400745	SH2 domain containing 5 [Source:HGNC Symbol;Acc:HGNC:28819]
ITPR3	119	0.0479	0.361	0.453	-2.21	14.4	31.8	ENSG00000096433	3710	inositol 1,4,5-trisphosphate receptor type 3 [Source:HGNC Symbol;Acc:HGNC:6182]
PFKFB4	126	0.0134	0.225	0.453	-2.21	12.2	27	ENSG00000114268	5210	6-phosphofructo-2-kinase/fructose-2,6-biphosphatase 4 [Source:HGNC Symbol;Acc:HGNC:8875]
DLK1	1660	0.0291	0.301	0.447	-2.24	248	555	ENSG00000185559	8788	delta like non-canonical Notch ligand 1 [Source:HGNC Symbol;Acc:HGNC:2907]
FAM71E1	26.1	0.0265	0.292	0.446	-2.24	3.51	7.86	ENSG00000142530	112703	family with sequence similarity 71 member E1 [Source:HGNC Symbol;Acc:HGNC:25107]
MFAP4	12.7	0.0216	0.269	0.446	-2.24	1.59	3.57	ENSG00000166482	4239	microfibril associated protein 4 [Source:HGNC Symbol;Acc:HGNC:7035]
PRR15	10.7	0.0338	0.318	0.446	-2.24	1.47	3.31	ENSG00000176532	222171	proline rich 15 [Source:HGNC Symbol;Acc:HGNC:22310]
NACC2	83.9	0.00452	0.155	0.445	-2.25	11.8	26.6	ENSG00000148411	138151	NACC family member 2 [Source:HGNC Symbol;Acc:HGNC:23846]
ZIC2	1670	0.0163	0.242	0.444	-2.25	210	473	ENSG00000043355	7546	Zic family member 2 [Source:HGNC Symbol;Acc:HGNC:12873]
FAM189A1	51.7	0.0218	0.271	0.443	-2.26	4.31	9.74	ENSG00000273564	23359	family with sequence similarity 189 member A1 [Source:HGNC Symbol;Acc:HGNC:29075]
FAM189A1	51.7	0.0218	0.271	0.443	-2.26	4.31	9.74	ENSG00000104059	23359	family with sequence similarity 189 member A1 [Source:HGNC Symbol;Acc:HGNC:29075]
MT-CO1	28100	0.0452	0.35	0.442	-2.26	3010	6820	ENSG00000198804	4512	mitochondrially encoded cytochrome c oxidase I [Source:HGNC Symbol;Acc:HGNC:7419]
RBM24	52.3	0.0362	0.327	0.443	-2.26	4.85	11	ENSG00000112183	221662	RNA binding motif protein 24 [Source:HGNC Symbol;Acc:HGNC:21539]
RSPO4	31	0.0183	0.256	0.443	-2.26	4.29	9.68	ENSG00000101282	343637	R-spondin 4 [Source:HGNC Symbol;Acc:HGNC:16175]
TSSC2	51.9	0.00373	0.144	0.442	-2.26	5.81	13.1	ENSG00000223756	NA	tumor suppressing subtransferable candidate 2 pseudogene [Source:HGNC Symbol;Acc:HGNC:12384]
PIK3CD	44.5	0.0286	0.299	0.441	-2.27	5.65	12.8	ENSG00000171608	5293	phosphatidylinositol-4,5-bisphosphate 3-kinase catalytic subunit delta [Source:HGNC Symbol;Acc:HGNC:8977]
TMEM132E	194	0.0068	0.178	0.44	-2.27	10.4	23.6	ENSG00000181291	124842	transmembrane protein 132E [Source:HGNC Symbol;Acc:HGNC:26991]
TRPV4	16.7	0.0149	0.235	0.441	-2.27	2.13	4.83	ENSG00000111199	59341	transient receptor potential cation channel subfamily V member 4 [Source:HGNC Symbol;Acc:HGNC:18083]
FERMT2	830	0.00826	0.189	0.438	-2.28	102	234	ENSG00000073712	10979	fermitin family member 2 [Source:HGNC Symbol;Acc:HGNC:15767]
MIPOL1	57.3	0.00255	0.126	0.438	-2.28	7.01	16	ENSG00000151338	145282	mirror-image polydactyly 1 [Source:HGNC Symbol;Acc:HGNC:21460]
ZIC3	247	0.00356	0.143	0.439	-2.28	33.5	76.4	ENSG00000156925	7547	Zic family member 3 [Source:HGNC Symbol;Acc:HGNC:12874]
ADRA2B	42.4	0.0325	0.313	0.436	-2.29	5.27	12.1	ENSG00000274286	151	adrenoceptor alpha 2B [Source:HGNC Symbol;Acc:HGNC:282]
ALOX5	8.6	0.0492	0.365	0.436	-2.29	1.06	2.42	ENSG00000275565	240	arachidonate 5-lipoxygenase [Source:HGNC Symbol;Acc:HGNC:435]
ALOX5	8.6	0.0492	0.365	0.436	-2.29	1.06	2.42	ENSG00000012779	240	arachidonate 5-lipoxygenase [Source:HGNC Symbol;Acc:HGNC:435]
ARHGEF4	87.8	0.00297	0.131	0.436	-2.29	10.5	24.1	ENSG00000136002	50649	Rho guanine nucleotide exchange factor 4 [Source:HGNC Symbol;Acc:HGNC:684]
CRTAC1	6.45	0.0305	0.306	0.437	-2.29	0.777	1.78	ENSG00000095713	55118	cartilage acidic protein 1 [Source:HGNC Symbol;Acc:HGNC:14882]
CD9	97.1	0.019	0.258	0.435	-2.3	13.6	31.2	ENSG00000010278	928	CD9 molecule [Source:HGNC Symbol;Acc:HGNC:1709]
LDHA	2370	0.0189	0.258	0.435	-2.3	220	505	ENSG00000134333	3939	lactate dehydrogenase A [Source:HGNC Symbol;Acc:HGNC:6535]
LDHA	2370	0.0189	0.258	0.435	-2.3	220	505	ENSG00000288299	3939	lactate dehydrogenase A [Source:HGNC Symbol;Acc:HGNC:6535]
RNF125	47.6	0.0088	0.194	0.434	-2.3	6.47	14.9	ENSG00000101695	54941	ring finger protein 125 [Source:HGNC Symbol;Acc:HGNC:21150]
ARL4D	78.2	0.00424	0.151	0.434	-2.31	9.83	22.7	ENSG00000175906	379	ADP ribosylation factor like GTPase 4D [Source:HGNC Symbol;Acc:HGNC:656]
ENPP1	44.5	0.009	0.195	0.433	-2.31	5.39	12.5	ENSG00000197594	5167	ectonucleotide pyrophosphatase/phosphodiesterase 1 [Source:HGNC Symbol;Acc:HGNC:3356]
PITPNM3	103	0.0229	0.275	0.433	-2.31	13.1	30.2	ENSG00000091622	83394	PITPNM family member 3 [Source:HGNC Symbol;Acc:HGNC:21043]
PLS1	84.7	0.011	0.21	0.432	-2.31	11.3	26.1	ENSG00000120756	5357	plastin 1 [Source:HGNC Symbol;Acc:HGNC:9090]
SCN4A	23.1	0.0374	0.329	0.433	-2.31	2.62	6.04	ENSG00000007314	6329	sodium voltage-gated channel alpha subunit 4 [Source:HGNC Symbol;Acc:HGNC:10591]
CIART	34.2	0.0191	0.259	0.431	-2.32	3.79	8.79	ENSG00000159208	148523	circadian associated repressor of transcription [Source:HGNC Symbol;Acc:HGNC:25200]
RFLNA	24.8	0.0174	0.249	0.43	-2.32	3.17	7.38	ENSG00000178882	144347	refilin A [Source:HGNC Symbol;Acc:HGNC:27051]
RFLNA	24.8	0.0174	0.249	0.43	-2.32	3.17	7.38	ENSG00000178882	100533183	refilin A [Source:HGNC Symbol;Acc:HGNC:27051]
MALL	29.8	0.00956	0.2	0.43	-2.33	4.03	9.38	ENSG00000144063	7851	mal, T cell differentiation protein like [Source:HGNC Symbol;Acc:HGNC:6818]
B4GALT4	168	0.00145	0.104	0.428	-2.34	20.2	47.3	ENSG00000121578	8702	beta-1,4-galactosyltransferase 4 [Source:HGNC Symbol;Acc:HGNC:927]
SLC1A3	268	0.00498	0.157	0.427	-2.34	33	77.4	ENSG00000079215	6507	solute carrier family 1 member 3 [Source:HGNC Symbol;Acc:HGNC:10941]
TGFB2	43.9	0.0162	0.241	0.427	-2.34	5.79	13.5	ENSG00000092969	7042	transforming growth factor beta 2 [Source:HGNC Symbol;Acc:HGNC:11768]
BMP2	151	0.0156	0.237	0.426	-2.35	14.5	34	ENSG00000125845	650	bone morphogenetic protein 2 [Source:HGNC Symbol;Acc:HGNC:1069]
OTX2	1090	0.00139	0.101	0.426	-2.35	116	273	ENSG00000165588	5015	orthodenticle homeobox 2 [Source:HGNC Symbol;Acc:HGNC:8522]
LRRC34	24.4	0.00674	0.178	0.423	-2.36	3.15	7.44	ENSG00000171757	151827	leucine rich repeat containing 34 [Source:HGNC Symbol;Acc:HGNC:28408]
MNS1	18.8	0.00883	0.194	0.424	-2.36	1.78	4.2	ENSG00000138587	55329	meiosis specific nuclear structural 1 [Source:HGNC Symbol;Acc:HGNC:29636]
LUZP2	41.8	0.0267	0.292	0.421	-2.37	5.32	12.6	ENSG00000187398	338645	leucine zipper protein 2 [Source:HGNC Symbol;Acc:HGNC:23206]
ARL2-SNX15	23.5	0.00656	0.176	0.419	-2.38	2.77	6.6	ENSG00000273003	NA	ARL2-SNX15 readthrough (NMD candidate) [Source:HGNC Symbol;Acc:HGNC:49197]
FFAR4	5.97	0.0489	0.364	0.42	-2.38	0.591	1.41	ENSG00000186188	338557	free fatty acid receptor 4 [Source:HGNC Symbol;Acc:HGNC:19061]
HLA-DMA	10.9	0.0338	0.319	0.418	-2.39	1.46	3.48	ENSG00000242361	3108	major histocompatibility complex, class II, DM alpha [Source:HGNC Symbol;Acc:HGNC:4934]
HLA-DMA	10.9	0.0338	0.319	0.418	-2.39	1.46	3.48	ENSG00000204257	3108	major histocompatibility complex, class II, DM alpha [Source:HGNC Symbol;Acc:HGNC:4934]
HLA-DMA	10.9	0.0338	0.319	0.418	-2.39	1.46	3.48	ENSG00000241394	3108	major histocompatibility complex, class II, DM alpha [Source:HGNC Symbol;Acc:HGNC:4934]
HLA-DMA	10.9	0.0338	0.319	0.418	-2.39	1.46	3.48	ENSG00000243189	3108	major histocompatibility complex, class II, DM alpha [Source:HGNC Symbol;Acc:HGNC:4934]
HLA-DMA	10.9	0.0338	0.319	0.418	-2.39	1.46	3.48	ENSG00000242685	3108	major histocompatibility complex, class II, DM alpha [Source:HGNC Symbol;Acc:HGNC:4934]
HLA-DMA	10.9	0.0338	0.319	0.418	-2.39	1.46	3.48	ENSG00000243719	3108	major histocompatibility complex, class II, DM alpha [Source:HGNC Symbol;Acc:HGNC:4934]
HLA-DMA	10.9	0.0338	0.319	0.418	-2.39	1.46	3.48	ENSG00000239463	3108	major histocompatibility complex, class II, DM alpha [Source:HGNC Symbol;Acc:HGNC:4934]
HLA-DMA	10.9	0.0338	0.319	0.418	-2.39	1.46	3.48	ENSG00000243215	3108	major histocompatibility complex, class II, DM alpha [Source:HGNC Symbol;Acc:HGNC:4934]
CRHR1	14.7	0.0268	0.293	0.416	-2.4	1.51	3.63	ENSG00000276191	104909134	corticotropin releasing hormone receptor 1 [Source:HGNC Symbol;Acc:HGNC:2357]
CRHR1	14.7	0.0268	0.293	0.416	-2.4	1.51	3.63	ENSG00000276191	1394	corticotropin releasing hormone receptor 1 [Source:HGNC Symbol;Acc:HGNC:2357]
CRHR1	14.7	0.0268	0.293	0.416	-2.4	1.51	3.63	ENSG00000120088	1394	corticotropin releasing hormone receptor 1 [Source:HGNC Symbol;Acc:HGNC:2357]
CRHR1	14.7	0.0268	0.293	0.416	-2.4	1.51	3.63	ENSG00000120088	104909134	corticotropin releasing hormone receptor 1 [Source:HGNC Symbol;Acc:HGNC:2357]
FEZ1	272	0.00625	0.172	0.417	-2.4	31.2	74.7	ENSG00000149557	9638	fasciculation and elongation protein zeta 1 [Source:HGNC Symbol;Acc:HGNC:3659]
LYN	240	0.0151	0.235	0.416	-2.41	33.5	80.5	ENSG00000254087	4067	LYN proto-oncogene, Src family tyrosine kinase [Source:HGNC Symbol;Acc:HGNC:6735]
EGR3	5.3	0.0334	0.317	0.413	-2.42	0.658	1.59	ENSG00000179388	1960	early growth response 3 [Source:HGNC Symbol;Acc:HGNC:3240]
EID3	7.47	0.0249	0.284	0.411	-2.44	0.947	2.31	ENSG00000255150	493861	EP300 interacting inhibitor of differentiation 3 [Source:HGNC Symbol;Acc:HGNC:32961]
FAM124A	162	0.0128	0.222	0.41	-2.44	17.8	43.5	ENSG00000150510	220108	family with sequence similarity 124 member A [Source:HGNC Symbol;Acc:HGNC:26413]
HTRA1	38.4	0.0156	0.237	0.41	-2.44	4.92	12	ENSG00000166033	5654	HtrA serine peptidase 1 [Source:HGNC Symbol;Acc:HGNC:9476]
LRIG1	831	0.000742	0.0812	0.41	-2.44	93.1	227	ENSG00000144749	26018	leucine rich repeats and immunoglobulin like domains 1 [Source:HGNC Symbol;Acc:HGNC:17360]
VAMP1	33.5	0.0299	0.304	0.409	-2.45	3.38	8.28	ENSG00000139190	6843	vesicle associated membrane protein 1 [Source:HGNC Symbol;Acc:HGNC:12642]
EPHX3	21.9	0.017	0.246	0.407	-2.46	2.69	6.62	ENSG00000105131	79852	epoxide hydrolase 3 [Source:HGNC Symbol;Acc:HGNC:23760]
ITGA2B	13.8	0.0261	0.29	0.406	-2.46	1.54	3.8	ENSG00000005961	3674	integrin subunit alpha 2b [Source:HGNC Symbol;Acc:HGNC:6138]
GSTO2	69.2	0.0117	0.214	0.405	-2.47	8.38	20.7	ENSG00000065621	119391	glutathione S-transferase omega 2 [Source:HGNC Symbol;Acc:HGNC:23064]
IGSF21	43.2	0.0152	0.235	0.405	-2.47	4.02	9.92	ENSG00000117154	84966	immunoglobin superfamily member 21 [Source:HGNC Symbol;Acc:HGNC:28246]
MIR302CHG	26.5	0.0341	0.32	0.405	-2.47	3.66	9.05	ENSG00000249532	NA	miR-302/367 cluster host gene [Source:HGNC Symbol;Acc:HGNC:41070]
CCDC125	13.9	0.0406	0.339	0.404	-2.48	0.621	1.54	ENSG00000277868	202243	coiled-coil domain containing 125 [Source:HGNC Symbol;Acc:HGNC:28924]
CCDC125	13.9	0.0406	0.339	0.404	-2.48	0.621	1.54	ENSG00000183323	202243	coiled-coil domain containing 125 [Source:HGNC Symbol;Acc:HGNC:28924]
FEZF1	420	0.047	0.357	0.403	-2.48	56.3	140	ENSG00000128610	389549	FEZ family zinc finger 1 [Source:HGNC Symbol;Acc:HGNC:22788]
LARGE1	297	0.000169	0.0594	0.403	-2.48	29.9	74.3	ENSG00000133424	9215	LARGE xylosyl- and glucuronyltransferase 1 [Source:HGNC Symbol;Acc:HGNC:6511]
SNTB1	50.6	0.00665	0.177	0.404	-2.48	6.2	15.4	ENSG00000172164	6641	syntrophin beta 1 [Source:HGNC Symbol;Acc:HGNC:11168]
PROKR1	15.1	0.0128	0.222	0.402	-2.49	1.82	4.52	ENSG00000169618	10887	prokineticin receptor 1 [Source:HGNC Symbol;Acc:HGNC:4524]
CD109	9.77	0.03	0.304	0.399	-2.5	1.18	2.95	ENSG00000156535	135228	CD109 molecule [Source:HGNC Symbol;Acc:HGNC:21685]
HMGA1P1	113	0.012	0.217	0.4	-2.5	12.5	31.2	ENSG00000236683	NA	high mobility group AT-hook 1 pseudogene 1 [Source:HGNC Symbol;Acc:HGNC:13321]
RPP25	119	0.000942	0.0889	0.4	-2.5	14.1	35.3	ENSG00000178718	54913	ribonuclease P and MRP subunit p25 [Source:HGNC Symbol;Acc:HGNC:30361]
AIFM3	18.6	0.0132	0.224	0.399	-2.51	2.37	5.95	ENSG00000183773	150209	apoptosis inducing factor mitochondria associated 3 [Source:HGNC Symbol;Acc:HGNC:26398]
FAM133A	5.85	0.023	0.275	0.398	-2.51	0.587	1.48	ENSG00000179083	286499	family with sequence similarity 133 member A [Source:HGNC Symbol;Acc:HGNC:26748]
FUT2	14.3	0.0451	0.349	0.399	-2.51	1.59	3.98	ENSG00000176920	2524	fucosyltransferase 2 [Source:HGNC Symbol;Acc:HGNC:4013]
HAS2	370	0.00294	0.131	0.396	-2.52	46.1	116	ENSG00000170961	3037	hyaluronan synthase 2 [Source:HGNC Symbol;Acc:HGNC:4819]
SLC25A21-AS1	8.07	0.0244	0.281	0.398	-2.52	0.822	2.07	ENSG00000258708	NA	SLC25A21 antisense RNA 1 [Source:HGNC Symbol;Acc:HGNC:44298]
LINC00926	4.63	0.0389	0.335	0.396	-2.53	0.528	1.33	ENSG00000247982	NA	long intergenic non-protein coding RNA 926 [Source:HGNC Symbol;Acc:HGNC:27514]
LINGO1	403	0.000401	0.0715	0.394	-2.54	44.9	114	ENSG00000169783	84894	leucine rich repeat and Ig domain containing 1 [Source:HGNC Symbol;Acc:HGNC:21205]
SBK3	5.37	0.0379	0.331	0.394	-2.54	0.691	1.75	ENSG00000231274	100130827	SH3 domain binding kinase family member 3 [Source:HGNC Symbol;Acc:HGNC:44121]
SHISAL2B	5.62	0.042	0.341	0.393	-2.54	0.703	1.79	ENSG00000145642	100132916	shisa like 2B [Source:HGNC Symbol;Acc:HGNC:34236]
TNNT1	226	0.0147	0.234	0.393	-2.54	28.7	73	ENSG00000105048	7138	troponin T1, slow skeletal type [Source:HGNC Symbol;Acc:HGNC:11948]
GRP	6.2	0.0431	0.344	0.388	-2.58	0.543	1.4	ENSG00000134443	2922	gastrin releasing peptide [Source:HGNC Symbol;Acc:HGNC:4605]
HYAL1	6.27	0.0346	0.322	0.388	-2.58	0.68	1.75	ENSG00000114378	3373	hyaluronidase 1 [Source:HGNC Symbol;Acc:HGNC:5320]
LGR5	57.6	0.0201	0.263	0.387	-2.58	5.76	14.9	ENSG00000139292	8549	leucine rich repeat containing G protein-coupled receptor 5 [Source:HGNC Symbol;Acc:HGNC:4504]
TENM1	9.3	0.0208	0.267	0.387	-2.58	1.13	2.93	ENSG00000009694	10178	teneurin transmembrane protein 1 [Source:HGNC Symbol;Acc:HGNC:8117]
TESC	13.3	0.0189	0.258	0.388	-2.58	1.71	4.4	ENSG00000088992	54997	tescalcin [Source:HGNC Symbol;Acc:HGNC:26065]
CDH23	94.6	0.04	0.337	0.386	-2.59	11.4	29.5	ENSG00000107736	64072	cadherin related 23 [Source:HGNC Symbol;Acc:HGNC:13733]
CRLF1	11.8	0.0286	0.299	0.386	-2.59	1.3	3.38	ENSG00000006016	9244	cytokine receptor like factor 1 [Source:HGNC Symbol;Acc:HGNC:2364]
CRYZ	71.3	0.000793	0.0844	0.387	-2.59	6.79	17.6	ENSG00000116791	1429	crystallin zeta [Source:HGNC Symbol;Acc:HGNC:2419]
NPTXR	123	0.000202	0.0594	0.386	-2.59	13.8	35.8	ENSG00000221890	23467	neuronal pentraxin receptor [Source:HGNC Symbol;Acc:HGNC:7954]
CRIP3	11.6	0.0358	0.326	0.383	-2.61	1.35	3.53	ENSG00000146215	401262	cysteine rich protein 3 [Source:HGNC Symbol;Acc:HGNC:17751]
OTOF	7.38	0.0319	0.311	0.382	-2.62	0.732	1.92	ENSG00000115155	9381	otoferlin [Source:HGNC Symbol;Acc:HGNC:8515]
ZIC1	622	0.0488	0.364	0.381	-2.62	61.2	160	ENSG00000152977	7545	Zic family member 1 [Source:HGNC Symbol;Acc:HGNC:12872]
SEL1L3	384	0.0162	0.241	0.38	-2.63	47.9	126	ENSG00000091490	23231	SEL1L family member 3 [Source:HGNC Symbol;Acc:HGNC:29108]
SEPHS1P6	7.42	0.0405	0.339	0.38	-2.63	0.67	1.76	ENSG00000213938	NA	selenophosphate synthetase 1 pseudogene 6 [Source:HGNC Symbol;Acc:HGNC:42168]
BNIP3	278	0.0211	0.267	0.379	-2.64	25.2	66.5	ENSG00000176171	664	BCL2 interacting protein 3 [Source:HGNC Symbol;Acc:HGNC:1084]
ZSCAN10	108	0.0483	0.362	0.379	-2.64	14.5	38.3	ENSG00000130182	84891	zinc finger and SCAN domain containing 10 [Source:HGNC Symbol;Acc:HGNC:12997]
GABRA2	13.5	0.0389	0.335	0.378	-2.65	1.58	4.18	ENSG00000151834	2555	gamma-aminobutyric acid type A receptor subunit alpha2 [Source:HGNC Symbol;Acc:HGNC:4076]
ASIC2	8.9	0.0447	0.348	0.376	-2.66	0.717	1.91	ENSG00000108684	40	acid sensing ion channel subunit 2 [Source:HGNC Symbol;Acc:HGNC:99]
CAPN12	3.71	0.0384	0.333	0.376	-2.66	0.354	0.94	ENSG00000182472	147968	calpain 12 [Source:HGNC Symbol;Acc:HGNC:13249]
STK32A	22.4	0.00567	0.166	0.375	-2.66	2.5	6.66	ENSG00000169302	202374	serine/threonine kinase 32A [Source:HGNC Symbol;Acc:HGNC:28317]
LAMA2	13.7	0.0194	0.26	0.375	-2.67	1.43	3.82	ENSG00000196569	3908	laminin subunit alpha 2 [Source:HGNC Symbol;Acc:HGNC:6482]
PCOLCE2	71.4	0.000527	0.0748	0.375	-2.67	8.3	22.1	ENSG00000163710	26577	procollagen C-endopeptidase enhancer 2 [Source:HGNC Symbol;Acc:HGNC:8739]
RCN3	12.3	0.026	0.289	0.374	-2.68	1.33	3.57	ENSG00000142552	57333	reticulocalbin 3 [Source:HGNC Symbol;Acc:HGNC:21145]
ZNF501	68.8	0.000897	0.0877	0.373	-2.68	6.85	18.4	ENSG00000186446	115560	zinc finger protein 501 [Source:HGNC Symbol;Acc:HGNC:23717]
ZNF501	68.8	0.000897	0.0877	0.373	-2.68	6.85	18.4	ENSG00000281661	115560	zinc finger protein 501 [Source:HGNC Symbol;Acc:HGNC:23717]
LINC01415	5.66	0.0244	0.281	0.372	-2.69	0.639	1.72	ENSG00000267325	NA	long intergenic non-protein coding RNA 1415 [Source:HGNC Symbol;Acc:HGNC:50709]
RAX	366	0.0172	0.248	0.372	-2.69	45.6	123	ENSG00000134438	30062	retina and anterior neural fold homeobox [Source:HGNC Symbol;Acc:HGNC:18662]
KCNN2	42.5	0.00949	0.2	0.37	-2.7	4.3	11.6	ENSG00000080709	3781	potassium calcium-activated channel subfamily N member 2 [Source:HGNC Symbol;Acc:HGNC:6291]
MMP24	33.9	0.0239	0.279	0.371	-2.7	3.43	9.26	ENSG00000125966	10893	matrix metallopeptidase 24 [Source:HGNC Symbol;Acc:HGNC:7172]
PFKP	163	0.000126	0.0587	0.371	-2.7	17.3	46.6	ENSG00000067057	5214	phosphofructokinase, platelet [Source:HGNC Symbol;Acc:HGNC:8878]
SEMA5B	205	0.00104	0.0917	0.37	-2.7	16.6	45	ENSG00000082684	54437	semaphorin 5B [Source:HGNC Symbol;Acc:HGNC:10737]
TRAF5	149	0.0007	0.0805	0.37	-2.7	15.4	41.7	ENSG00000082512	7188	TNF receptor associated factor 5 [Source:HGNC Symbol;Acc:HGNC:12035]
COL14A1	60.1	0.00496	0.157	0.369	-2.71	7.02	19	ENSG00000187955	7373	collagen type XIV alpha 1 chain [Source:HGNC Symbol;Acc:HGNC:2191]
KCNG1	82.1	0.00564	0.166	0.368	-2.72	9.61	26.1	ENSG00000026559	3755	potassium voltage-gated channel modifier subfamily G member 1 [Source:HGNC Symbol;Acc:HGNC:6248]
ASTN2	209	0.000241	0.0594	0.366	-2.73	24.5	66.8	ENSG00000148219	23245	astrotactin 2 [Source:HGNC Symbol;Acc:HGNC:17021]
NPIPB6	5.13	0.048	0.361	0.366	-2.73	0.507	1.39	ENSG00000198156	728741	nuclear pore complex interacting protein family member B6 [Source:HGNC Symbol;Acc:HGNC:37454]
MYO3B	167	0.0116	0.214	0.365	-2.74	19.5	53.5	ENSG00000071909	140469	myosin IIIB [Source:HGNC Symbol;Acc:HGNC:15576]
PPP1R16B	14.8	0.0186	0.257	0.365	-2.74	1.63	4.48	ENSG00000101445	26051	protein phosphatase 1 regulatory subunit 16B [Source:HGNC Symbol;Acc:HGNC:15850]
LARGE2	60.7	0.00489	0.157	0.364	-2.75	7.34	20.2	ENSG00000165905	120071	LARGE xylosyl- and glucuronyltransferase 2 [Source:HGNC Symbol;Acc:HGNC:16522]
TYW3	70.2	0.000527	0.0748	0.362	-2.76	6.45	17.8	ENSG00000162623	127253	tRNA-yW synthesizing protein 3 homolog [Source:HGNC Symbol;Acc:HGNC:24757]
ACTN3	255	0.00157	0.108	0.361	-2.77	18.6	51.6	ENSG00000248746	89	actinin alpha 3 (gene/pseudogene) [Source:HGNC Symbol;Acc:HGNC:165]
ANKRD24	17.4	0.00958	0.2	0.361	-2.77	1.94	5.38	ENSG00000089847	170961	ankyrin repeat domain 24 [Source:HGNC Symbol;Acc:HGNC:29424]
FOXB1	33.2	0.0143	0.231	0.361	-2.77	3.39	9.39	ENSG00000171956	27023	forkhead box B1 [Source:HGNC Symbol;Acc:HGNC:3799]
IRF8	3.12	0.049	0.364	0.361	-2.77	0.345	0.957	ENSG00000140968	3394	interferon regulatory factor 8 [Source:HGNC Symbol;Acc:HGNC:5358]
KCNG3	23.7	0.00459	0.156	0.362	-2.77	2.85	7.89	ENSG00000171126	170850	potassium voltage-gated channel modifier subfamily G member 3 [Source:HGNC Symbol;Acc:HGNC:18306]
CLU	1510	0.0105	0.207	0.36	-2.78	158	439	ENSG00000120885	1191	clusterin [Source:HGNC Symbol;Acc:HGNC:2095]
GRIK4	13	0.0102	0.205	0.357	-2.8	1.25	3.51	ENSG00000149403	2900	glutamate ionotropic receptor kainate type subunit 4 [Source:HGNC Symbol;Acc:HGNC:4582]
KLRG2	30.6	0.00903	0.196	0.357	-2.8	3.82	10.7	ENSG00000188883	346689	killer cell lectin like receptor G2 [Source:HGNC Symbol;Acc:HGNC:24778]
LDHAP4	67.2	0.04	0.337	0.358	-2.8	5.45	15.2	ENSG00000214110	NA	lactate dehydrogenase A pseudogene 4 [Source:HGNC Symbol;Acc:HGNC:6539]
WWC2-AS2	3.29	0.047	0.357	0.357	-2.8	0.394	1.1	ENSG00000251359	NA	WWC2 antisense RNA 2 [Source:HGNC Symbol;Acc:HGNC:26390]
ERVV-1	3.89	0.0408	0.339	0.356	-2.81	0.445	1.25	ENSG00000269526	147664	endogenous retrovirus group V member 1, envelope [Source:HGNC Symbol;Acc:HGNC:26501]
CDHR1	26.9	0.0056	0.165	0.354	-2.82	2.44	6.9	ENSG00000148600	92211	cadherin related family member 1 [Source:HGNC Symbol;Acc:HGNC:14550]
PLAAT5	18	0.0391	0.335	0.354	-2.82	1.59	4.48	ENSG00000168004	117245	phospholipase A and acyltransferase 5 [Source:HGNC Symbol;Acc:HGNC:24978]
SNTG2	2.83	0.0463	0.354	0.353	-2.83	0.324	0.915	ENSG00000281486	54221	syntrophin gamma 2 [Source:HGNC Symbol;Acc:HGNC:13741]
SNTG2	2.83	0.0463	0.354	0.353	-2.83	0.324	0.915	ENSG00000281020	54221	syntrophin gamma 2 [Source:HGNC Symbol;Acc:HGNC:13741]
SNTG2	2.83	0.0463	0.354	0.353	-2.83	0.324	0.915	ENSG00000172554	54221	syntrophin gamma 2 [Source:HGNC Symbol;Acc:HGNC:13741]
CYP2S1	157	0.0337	0.318	0.351	-2.85	19	54	ENSG00000167600	29785	cytochrome P450 family 2 subfamily S member 1 [Source:HGNC Symbol;Acc:HGNC:15654]
RHOF	19.8	0.004	0.148	0.351	-2.85	2.16	6.16	ENSG00000139725	54509	ras homolog family member F, filopodia associated [Source:HGNC Symbol;Acc:HGNC:15703]
RPL7P20	4.11	0.0226	0.273	0.35	-2.85	0.446	1.27	ENSG00000254252	NA	ribosomal protein L7 pseudogene 20 [Source:HGNC Symbol;Acc:HGNC:36013]
SLC25A21	15.4	0.0406	0.339	0.351	-2.85	1.7	4.84	ENSG00000183032	89874	solute carrier family 25 member 21 [Source:HGNC Symbol;Acc:HGNC:14411]
STC1	134	0.000181	0.0594	0.351	-2.85	15	42.9	ENSG00000159167	6781	stanniocalcin 1 [Source:HGNC Symbol;Acc:HGNC:11373]
LINGO3	7.11	0.0435	0.344	0.349	-2.86	0.802	2.29	ENSG00000220008	645191	leucine rich repeat and Ig domain containing 3 [Source:HGNC Symbol;Acc:HGNC:21206]
NPIPA7	2.1	0.0411	0.339	0.348	-2.87	0.221	0.634	ENSG00000214967	101059938	nuclear pore complex interacting protein family member A7 [Source:HGNC Symbol;Acc:HGNC:41982]
FEZF1-AS1	197	0.0163	0.242	0.348	-2.88	22.1	63.5	ENSG00000230316	NA	FEZF1 antisense RNA 1 [Source:HGNC Symbol;Acc:HGNC:41001]
NCAN	144	0.000264	0.0594	0.347	-2.88	13.4	38.7	ENSG00000130287	1463	neurocan [Source:HGNC Symbol;Acc:HGNC:2465]
DPYSL3	3790	0.000639	0.0789	0.346	-2.89	385	1110	ENSG00000113657	1809	dihydropyrimidinase like 3 [Source:HGNC Symbol;Acc:HGNC:3015]
GJB7	4.73	0.0364	0.327	0.346	-2.89	0.554	1.6	ENSG00000164411	375519	gap junction protein beta 7 [Source:HGNC Symbol;Acc:HGNC:16690]
IL18	1.51	0.0444	0.347	0.346	-2.89	0.167	0.483	ENSG00000150782	3606	interleukin 18 [Source:HGNC Symbol;Acc:HGNC:5986]
SLC6A8	958	0.000276	0.0607	0.345	-2.89	104	300	ENSG00000130821	6535	solute carrier family 6 member 8 [Source:HGNC Symbol;Acc:HGNC:11055]
EGFL7	61.5	0.00543	0.164	0.345	-2.9	6.56	19	ENSG00000172889	51162	EGF like domain multiple 7 [Source:HGNC Symbol;Acc:HGNC:20594]
ZFP3	5.62	0.0255	0.286	0.344	-2.91	0.583	1.7	ENSG00000180787	124961	ZFP3 zinc finger protein [Source:HGNC Symbol;Acc:HGNC:12861]
ZNF528	25.1	0.00182	0.11	0.343	-2.91	2.64	7.68	ENSG00000167555	84436	zinc finger protein 528 [Source:HGNC Symbol;Acc:HGNC:29384]
LRRC37A6P	6.43	0.0165	0.243	0.342	-2.92	0.597	1.75	ENSG00000230445	NA	leucine rich repeat containing 37 member A6, pseudogene [Source:HGNC Symbol;Acc:HGNC:33746]
OLFML2A	55.3	0.0065	0.176	0.341	-2.93	6.58	19.3	ENSG00000185585	169611	olfactomedin like 2A [Source:HGNC Symbol;Acc:HGNC:27270]
C6orf132	110	0.00763	0.184	0.34	-2.94	13	38.2	ENSG00000188112	647024	chromosome 6 open reading frame 132 [Source:HGNC Symbol;Acc:HGNC:21288]
LINC02387	4.08	0.0395	0.336	0.341	-2.94	0.46	1.35	ENSG00000256232	NA	long intergenic non-protein coding RNA 2387 [Source:HGNC Symbol;Acc:HGNC:53313]
USHBP1	4.91	0.0274	0.294	0.34	-2.94	0.568	1.67	ENSG00000130307	83878	USH1 protein network component harmonin binding protein 1 [Source:HGNC Symbol;Acc:HGNC:24058]
KLF4	16.4	0.0167	0.243	0.339	-2.95	1.89	5.56	ENSG00000136826	9314	Kruppel like factor 4 [Source:HGNC Symbol;Acc:HGNC:6348]
RASSF10	21.3	0.00286	0.13	0.339	-2.95	2.37	7	ENSG00000189431	644943	Ras association domain family member 10 [Source:HGNC Symbol;Acc:HGNC:33984]
CD40	13.7	0.00851	0.19	0.338	-2.96	1.42	4.21	ENSG00000101017	958	CD40 molecule [Source:HGNC Symbol;Acc:HGNC:11919]
MATK	18	0.0469	0.357	0.336	-2.97	2.15	6.41	ENSG00000007264	4145	megakaryocyte-associated tyrosine kinase [Source:HGNC Symbol;Acc:HGNC:6906]
BARHL1	85.5	0.0012	0.0966	0.336	-2.98	2.11	6.28	ENSG00000125492	56751	BarH like homeobox 1 [Source:HGNC Symbol;Acc:HGNC:953]
FJX1	427	0.00934	0.2	0.334	-2.99	45.2	135	ENSG00000179431	24147	four-jointed box kinase 1 [Source:HGNC Symbol;Acc:HGNC:17166]
LINC02301	2.19	0.044	0.346	0.335	-2.99	0.2	0.599	ENSG00000258743	NA	long intergenic non-protein coding RNA 2301 [Source:HGNC Symbol;Acc:HGNC:53220]
STOM	656	0.000198	0.0594	0.334	-3	75.1	225	ENSG00000148175	2040	stomatin [Source:HGNC Symbol;Acc:HGNC:3383]
HDAC2-AS2	16.6	0.0122	0.219	0.331	-3.02	1.63	4.93	ENSG00000228624	NA	HDAC2 and HS3ST5 antisense RNA 2 [Source:HGNC Symbol;Acc:HGNC:43590]
SCN5A	46.1	0.00333	0.138	0.331	-3.02	4.86	14.7	ENSG00000183873	6331	sodium voltage-gated channel alpha subunit 5 [Source:HGNC Symbol;Acc:HGNC:10593]
B4GALNT3	159	6.2e-05	0.0502	0.33	-3.03	18.2	55.1	ENSG00000139044	283358	beta-1,4-N-acetyl-galactosaminyltransferase 3 [Source:HGNC Symbol;Acc:HGNC:24137]
CPZ	40.5	0.00186	0.111	0.329	-3.04	4.54	13.8	ENSG00000109625	8532	carboxypeptidase Z [Source:HGNC Symbol;Acc:HGNC:2333]
FGFR4	43.4	0.00323	0.136	0.329	-3.04	4.86	14.7	ENSG00000160867	2264	fibroblast growth factor receptor 4 [Source:HGNC Symbol;Acc:HGNC:3691]
ISG15	10.7	0.0235	0.278	0.328	-3.04	1.14	3.46	ENSG00000187608	9636	ISG15 ubiquitin like modifier [Source:HGNC Symbol;Acc:HGNC:4053]
LCMT1-AS2	7.37	0.00988	0.202	0.329	-3.04	0.825	2.51	ENSG00000260034	NA	LCMT1 antisense RNA 2 [Source:HGNC Symbol;Acc:HGNC:51178]
SYTL4	31.9	0.0234	0.277	0.327	-3.06	3.23	9.88	ENSG00000102362	94121	synaptotagmin like 4 [Source:HGNC Symbol;Acc:HGNC:15588]
CHRNA3	204	0.0374	0.329	0.326	-3.07	15.9	48.8	ENSG00000080644	1136	cholinergic receptor nicotinic alpha 3 subunit [Source:HGNC Symbol;Acc:HGNC:1957]
LDHD	5.83	0.0408	0.339	0.326	-3.07	0.658	2.02	ENSG00000166816	197257	lactate dehydrogenase D [Source:HGNC Symbol;Acc:HGNC:19708]
SLC44A4	4.88	0.0234	0.277	0.326	-3.07	0.491	1.51	ENSG00000231479	80736	solute carrier family 44 member 4 [Source:HGNC Symbol;Acc:HGNC:13941]
SLC44A4	4.88	0.0234	0.277	0.326	-3.07	0.491	1.51	ENSG00000235336	80736	solute carrier family 44 member 4 [Source:HGNC Symbol;Acc:HGNC:13941]
SLC44A4	4.88	0.0234	0.277	0.326	-3.07	0.491	1.51	ENSG00000229077	80736	solute carrier family 44 member 4 [Source:HGNC Symbol;Acc:HGNC:13941]
SLC44A4	4.88	0.0234	0.277	0.326	-3.07	0.491	1.51	ENSG00000204385	80736	solute carrier family 44 member 4 [Source:HGNC Symbol;Acc:HGNC:13941]
SLC44A4	4.88	0.0234	0.277	0.326	-3.07	0.491	1.51	ENSG00000232180	80736	solute carrier family 44 member 4 [Source:HGNC Symbol;Acc:HGNC:13941]
SLC44A4	4.88	0.0234	0.277	0.326	-3.07	0.491	1.51	ENSG00000206378	80736	solute carrier family 44 member 4 [Source:HGNC Symbol;Acc:HGNC:13941]
SLC44A4	4.88	0.0234	0.277	0.326	-3.07	0.491	1.51	ENSG00000228263	80736	solute carrier family 44 member 4 [Source:HGNC Symbol;Acc:HGNC:13941]
SLC44A4	4.88	0.0234	0.277	0.326	-3.07	0.491	1.51	ENSG00000203463	80736	solute carrier family 44 member 4 [Source:HGNC Symbol;Acc:HGNC:13941]
KCNK12	60.6	0.00281	0.129	0.325	-3.08	6.97	21.5	ENSG00000184261	56660	potassium two pore domain channel subfamily K member 12 [Source:HGNC Symbol;Acc:HGNC:6274]
SOX21-AS1	95.5	0.00367	0.144	0.324	-3.08	10.6	32.6	ENSG00000227640	NA	SOX21 antisense divergent transcript 1 [Source:HGNC Symbol;Acc:HGNC:39807]
SAP18P2	1.67	0.0316	0.31	0.322	-3.1	0.114	0.354	ENSG00000223873	NA	SAP18 pseudogene 2 [Source:HGNC Symbol;Acc:HGNC:51568]
EPHA10	2.16	0.0407	0.339	0.32	-3.13	0.197	0.616	ENSG00000183317	284656	EPH receptor A10 [Source:HGNC Symbol;Acc:HGNC:19987]
ARHGAP25	7.08	0.0409	0.339	0.319	-3.14	0.742	2.33	ENSG00000163219	9938	Rho GTPase activating protein 25 [Source:HGNC Symbol;Acc:HGNC:28951]
MFAP3L	68	0.00269	0.128	0.319	-3.14	6.9	21.6	ENSG00000198948	9848	microfibril associated protein 3 like [Source:HGNC Symbol;Acc:HGNC:29083]
WDR72	17.8	0.0131	0.223	0.317	-3.15	1.97	6.22	ENSG00000166415	256764	WD repeat domain 72 [Source:HGNC Symbol;Acc:HGNC:26790]
C13orf42	14	0.0404	0.338	0.316	-3.16	1.63	5.16	ENSG00000226792	647166	chromosome 13 open reading frame 42 [Source:HGNC Symbol;Acc:HGNC:42693]
MRC1	2.18	0.0442	0.346	0.316	-3.16	0.223	0.705	ENSG00000260314	4360	mannose receptor C-type 1 [Source:HGNC Symbol;Acc:HGNC:7228]
HSPA2	33.8	0.00555	0.165	0.314	-3.18	3.51	11.2	ENSG00000126803	3306	heat shock protein family A (Hsp70) member 2 [Source:HGNC Symbol;Acc:HGNC:5235]
MPL	4.14	0.0307	0.307	0.314	-3.18	0.428	1.36	ENSG00000117400	4352	MPL proto-oncogene, thrombopoietin receptor [Source:HGNC Symbol;Acc:HGNC:7217]
TUNAR	108	0.00278	0.129	0.315	-3.18	10.9	34.5	ENSG00000250366	NA	TCL1 upstream neural differentiation-associated RNA [Source:HGNC Symbol;Acc:HGNC:44088]
GUCA1A	20.9	0.00796	0.189	0.314	-3.19	1.94	6.18	ENSG00000048545	2978	guanylate cyclase activator 1A [Source:HGNC Symbol;Acc:HGNC:4678]
TNFRSF11B	23.4	0.0046	0.156	0.314	-3.19	2.55	8.12	ENSG00000164761	4982	TNF receptor superfamily member 11b [Source:HGNC Symbol;Acc:HGNC:11909]
PIK3AP1	11.6	0.0323	0.312	0.312	-3.21	1.14	3.67	ENSG00000155629	118788	phosphoinositide-3-kinase adaptor protein 1 [Source:HGNC Symbol;Acc:HGNC:30034]
ERMN	28.8	0.00847	0.19	0.311	-3.22	2.16	6.95	ENSG00000136541	57471	ermin [Source:HGNC Symbol;Acc:HGNC:29208]
TMSB4Y	15.6	0.00235	0.123	0.31	-3.22	1.5	4.85	ENSG00000154620	9087	thymosin beta 4 Y-linked [Source:HGNC Symbol;Acc:HGNC:11882]
KLHL41	2.92	0.0335	0.317	0.309	-3.24	0.221	0.715	ENSG00000239474	10324	kelch like family member 41 [Source:HGNC Symbol;Acc:HGNC:16905]
PPFIA4	30.6	0.00778	0.186	0.307	-3.25	1.74	5.65	ENSG00000143847	8497	PTPRF interacting protein alpha 4 [Source:HGNC Symbol;Acc:HGNC:9248]
TLL2	9.85	0.0189	0.258	0.308	-3.25	1.01	3.27	ENSG00000095587	7093	tolloid like 2 [Source:HGNC Symbol;Acc:HGNC:11844]
GRID2	34.5	0.0208	0.267	0.307	-3.26	2.48	8.09	ENSG00000152208	2895	glutamate ionotropic receptor delta type subunit 2 [Source:HGNC Symbol;Acc:HGNC:4576]
HRH3	17.3	0.00696	0.18	0.305	-3.28	1.64	5.38	ENSG00000101180	11255	histamine receptor H3 [Source:HGNC Symbol;Acc:HGNC:5184]
ASDURF	8.74	0.0144	0.232	0.302	-3.31	0.684	2.26	ENSG00000286053	110599588	ASNSD1 upstream reading frame [Source:HGNC Symbol;Acc:HGNC:53619]
EHD2	65.7	0.00125	0.0987	0.302	-3.31	6.99	23.1	ENSG00000024422	30846	EH domain containing 2 [Source:HGNC Symbol;Acc:HGNC:3243]
LPAR3	93.2	0.00988	0.202	0.302	-3.31	6.11	20.3	ENSG00000171517	23566	lysophosphatidic acid receptor 3 [Source:HGNC Symbol;Acc:HGNC:14298]
MRGPRF	18.3	0.0199	0.263	0.301	-3.32	1.98	6.57	ENSG00000172935	116535	MAS related GPR family member F [Source:HGNC Symbol;Acc:HGNC:24828]
TRABD2A	14.5	0.00488	0.157	0.299	-3.35	1.38	4.61	ENSG00000186854	129293	TraB domain containing 2A [Source:HGNC Symbol;Acc:HGNC:27013]
GPR176	174	0.0195	0.26	0.297	-3.36	17.3	58.2	ENSG00000166073	11245	G protein-coupled receptor 176 [Source:HGNC Symbol;Acc:HGNC:32370]
NTN1	119	0.000255	0.0594	0.297	-3.36	11	37.1	ENSG00000065320	9423	netrin 1 [Source:HGNC Symbol;Acc:HGNC:8029]
SALL3	233	0.000243	0.0594	0.298	-3.36	21.2	71.3	ENSG00000263310	27164	spalt like transcription factor 3 [Source:HGNC Symbol;Acc:HGNC:10527]
SALL3	233	0.000243	0.0594	0.298	-3.36	21.2	71.3	ENSG00000256463	27164	spalt like transcription factor 3 [Source:HGNC Symbol;Acc:HGNC:10527]
SALL3	233	0.000243	0.0594	0.298	-3.36	21.2	71.3	ENSG00000277015	27164	spalt like transcription factor 3 [Source:HGNC Symbol;Acc:HGNC:10527]
FBXO2	57.2	0.00426	0.152	0.296	-3.37	6.11	20.6	ENSG00000116661	26232	F-box protein 2 [Source:HGNC Symbol;Acc:HGNC:13581]
WSCD2	17.6	0.0131	0.223	0.296	-3.38	1.13	3.8	ENSG00000075035	9671	WSC domain containing 2 [Source:HGNC Symbol;Acc:HGNC:29117]
AKIRIN1P2	1.71	0.0436	0.345	0.295	-3.39	0.164	0.555	ENSG00000228125	NA	akirin 1 pseudogene 2 [Source:HGNC Symbol;Acc:HGNC:50797]
ASS1P7	7.17	0.019	0.259	0.295	-3.39	0.761	2.58	ENSG00000236893	NA	argininosuccinate synthetase 1 pseudogene 7 [Source:HGNC Symbol;Acc:HGNC:770]
LINC02772	4.54	0.0486	0.363	0.294	-3.4	0.506	1.72	ENSG00000271736	NA	long intergenic non-protein coding RNA 2772 [Source:HGNC Symbol;Acc:HGNC:54292]
GJA3	6.3	0.0152	0.236	0.292	-3.42	0.643	2.2	ENSG00000121743	2700	gap junction protein alpha 3 [Source:HGNC Symbol;Acc:HGNC:4277]
TTLL6	15.1	0.0267	0.292	0.292	-3.42	1.31	4.46	ENSG00000170703	284076	tubulin tyrosine ligase like 6 [Source:HGNC Symbol;Acc:HGNC:26664]
IL12A	6.5	0.0374	0.329	0.291	-3.43	0.609	2.09	ENSG00000168811	3592	interleukin 12A [Source:HGNC Symbol;Acc:HGNC:5969]
APOL4	9.02	0.0321	0.311	0.291	-3.44	0.947	3.25	ENSG00000100336	80832	apolipoprotein L4 [Source:HGNC Symbol;Acc:HGNC:14867]
SLC16A3	49.1	0.00854	0.19	0.291	-3.44	3.73	12.8	ENSG00000141526	9123	solute carrier family 16 member 3 [Source:HGNC Symbol;Acc:HGNC:10924]
YBX2	40.3	0.00447	0.154	0.291	-3.44	4.11	14.1	ENSG00000006047	51087	Y-box binding protein 2 [Source:HGNC Symbol;Acc:HGNC:17948]
YBX2	40.3	0.00447	0.154	0.291	-3.44	4.11	14.1	ENSG00000288504	51087	Y-box binding protein 2 [Source:HGNC Symbol;Acc:HGNC:17948]
ZNF259P1	3.07	0.0279	0.296	0.29	-3.44	0.249	0.857	ENSG00000219565	NA	zinc finger protein 259 pseudogene 1 [Source:HGNC Symbol;Acc:HGNC:13052]
AOAH	2.48	0.029	0.301	0.289	-3.46	0.245	0.848	ENSG00000136250	313	acyloxyacyl hydrolase [Source:HGNC Symbol;Acc:HGNC:548]
DKK1	34.4	0.00318	0.136	0.288	-3.47	3.04	10.6	ENSG00000107984	22943	dickkopf WNT signaling pathway inhibitor 1 [Source:HGNC Symbol;Acc:HGNC:2891]
OXCT2P1	2.95	0.0165	0.243	0.287	-3.48	0.226	0.784	ENSG00000237624	NA	3-oxoacid CoA-transferase 2 pseudogene 1 [Source:HGNC Symbol;Acc:HGNC:21627]
PAPLN	49.7	0.0386	0.334	0.286	-3.49	5.21	18.2	ENSG00000100767	89932	papilin, proteoglycan like sulfated glycoprotein [Source:HGNC Symbol;Acc:HGNC:19262]
TNNI3	24.2	0.0214	0.268	0.287	-3.49	2.46	8.59	ENSG00000129991	7137	troponin I3, cardiac type [Source:HGNC Symbol;Acc:HGNC:11947]
ASS1	136	2.97e-05	0.0502	0.284	-3.52	12.4	43.6	ENSG00000130707	445	argininosuccinate synthase 1 [Source:HGNC Symbol;Acc:HGNC:758]
CACNA1B	42.1	0.00671	0.177	0.284	-3.52	2.32	8.18	ENSG00000148408	774	calcium voltage-gated channel subunit alpha1 B [Source:HGNC Symbol;Acc:HGNC:1389]
LHX5	807	0.00264	0.127	0.283	-3.54	66.4	235	ENSG00000089116	64211	LIM homeobox 5 [Source:HGNC Symbol;Acc:HGNC:14216]
PADI1	1.92	0.042	0.341	0.283	-3.54	0.167	0.591	ENSG00000142623	29943	peptidyl arginine deiminase 1 [Source:HGNC Symbol;Acc:HGNC:18367]
PADI1	1.92	0.042	0.341	0.283	-3.54	0.167	0.591	ENSG00000281459	29943	peptidyl arginine deiminase 1 [Source:HGNC Symbol;Acc:HGNC:18367]
KCNK6	23.6	0.00516	0.16	0.281	-3.56	2.36	8.41	ENSG00000099337	9424	potassium two pore domain channel subfamily K member 6 [Source:HGNC Symbol;Acc:HGNC:6281]
FLT3LG	2.06	0.0381	0.332	0.28	-3.57	0.159	0.567	ENSG00000090554	2323	fms related receptor tyrosine kinase 3 ligand [Source:HGNC Symbol;Acc:HGNC:3766]
PHF24	19.6	0.02	0.263	0.278	-3.6	1.76	6.35	ENSG00000122733	23349	PHD finger protein 24 [Source:HGNC Symbol;Acc:HGNC:29180]
RASIP1	9.14	0.00948	0.2	0.278	-3.6	0.784	2.82	ENSG00000105538	54922	Ras interacting protein 1 [Source:HGNC Symbol;Acc:HGNC:24716]
CCDC60	14.9	0.0186	0.257	0.277	-3.61	1.5	5.41	ENSG00000183273	160777	coiled-coil domain containing 60 [Source:HGNC Symbol;Acc:HGNC:28610]
GPR78	7.37	0.0141	0.23	0.273	-3.66	0.678	2.48	ENSG00000155269	27201	G protein-coupled receptor 78 [Source:HGNC Symbol;Acc:HGNC:4528]
MEIOB	2.34	0.0377	0.331	0.272	-3.68	0.23	0.846	ENSG00000282650	254528	meiosis specific with OB-fold [Source:HGNC Symbol;Acc:HGNC:28569]
MEIOB	2.34	0.0377	0.331	0.272	-3.68	0.23	0.846	ENSG00000162039	254528	meiosis specific with OB-fold [Source:HGNC Symbol;Acc:HGNC:28569]
CCL28	5.1	0.0113	0.212	0.27	-3.7	0.505	1.87	ENSG00000151882	56477	C-C motif chemokine ligand 28 [Source:HGNC Symbol;Acc:HGNC:17700]
ZNF880	54	0.000798	0.0844	0.27	-3.7	5.07	18.8	ENSG00000221923	400713	zinc finger protein 880 [Source:HGNC Symbol;Acc:HGNC:37249]
ADAMTS9-AS1	3.01	0.0138	0.228	0.268	-3.72	0.279	1.04	ENSG00000241158	NA	ADAMTS9 antisense RNA 1 [Source:HGNC Symbol;Acc:HGNC:40625]
SAMHD1	365	0.00158	0.108	0.267	-3.75	33.7	126	ENSG00000101347	25939	SAM and HD domain containing deoxynucleoside triphosphate triphosphohydrolase 1 [Source:HGNC Symbol;Acc:HGNC:15925]
F2RL1	204	0.00237	0.123	0.266	-3.76	19.9	75	ENSG00000164251	2150	F2R like trypsin receptor 1 [Source:HGNC Symbol;Acc:HGNC:3538]
FOXA1	5.94	0.00492	0.157	0.266	-3.76	0.531	2	ENSG00000129514	3169	forkhead box A1 [Source:HGNC Symbol;Acc:HGNC:5021]
TRPC6	22.2	0.00648	0.176	0.266	-3.76	2.29	8.63	ENSG00000137672	7225	transient receptor potential cation channel subfamily C member 6 [Source:HGNC Symbol;Acc:HGNC:12338]
PRSS12	70.9	0.000607	0.0789	0.263	-3.8	6.67	25.3	ENSG00000164099	8492	serine protease 12 [Source:HGNC Symbol;Acc:HGNC:9477]
IRF4	15.9	0.0161	0.24	0.262	-3.81	1.56	5.93	ENSG00000137265	3662	interferon regulatory factor 4 [Source:HGNC Symbol;Acc:HGNC:6119]
PSMB8	6.9	0.0486	0.363	0.263	-3.81	0.684	2.61	ENSG00000204264	5696	proteasome 20S subunit beta 8 [Source:HGNC Symbol;Acc:HGNC:9545]
PSMB8	6.9	0.0486	0.363	0.263	-3.81	0.684	2.61	ENSG00000230669	5696	proteasome 20S subunit beta 8 [Source:HGNC Symbol;Acc:HGNC:9545]
PSMB8	6.9	0.0486	0.363	0.263	-3.81	0.684	2.61	ENSG00000226201	5696	proteasome 20S subunit beta 8 [Source:HGNC Symbol;Acc:HGNC:9545]
PSMB8	6.9	0.0486	0.363	0.263	-3.81	0.684	2.61	ENSG00000206298	5696	proteasome 20S subunit beta 8 [Source:HGNC Symbol;Acc:HGNC:9545]
PSMB8	6.9	0.0486	0.363	0.263	-3.81	0.684	2.61	ENSG00000230034	5696	proteasome 20S subunit beta 8 [Source:HGNC Symbol;Acc:HGNC:9545]
PSMB8	6.9	0.0486	0.363	0.263	-3.81	0.684	2.61	ENSG00000231631	5696	proteasome 20S subunit beta 8 [Source:HGNC Symbol;Acc:HGNC:9545]
PSMB8	6.9	0.0486	0.363	0.263	-3.81	0.684	2.61	ENSG00000236443	5696	proteasome 20S subunit beta 8 [Source:HGNC Symbol;Acc:HGNC:9545]
PSMB8	6.9	0.0486	0.363	0.263	-3.81	0.684	2.61	ENSG00000235715	5696	proteasome 20S subunit beta 8 [Source:HGNC Symbol;Acc:HGNC:9545]
SLCO1A2	12.9	0.00439	0.154	0.262	-3.81	1.11	4.25	ENSG00000084453	6579	solute carrier organic anion transporter family member 1A2 [Source:HGNC Symbol;Acc:HGNC:10956]
SV2B	5.9	0.00512	0.159	0.261	-3.83	0.338	1.3	ENSG00000185518	9899	synaptic vesicle glycoprotein 2B [Source:HGNC Symbol;Acc:HGNC:16874]
H3-2	13.5	0.00297	0.131	0.26	-3.85	1.27	4.88	ENSG00000273213	440686	H3.2 histone (putative) [Source:HGNC Symbol;Acc:HGNC:32060]
SLC9A5	9.02	0.00718	0.182	0.259	-3.87	0.709	2.74	ENSG00000135740	6553	solute carrier family 9 member A5 [Source:HGNC Symbol;Acc:HGNC:11078]
LINC00664	5.28	0.0319	0.311	0.258	-3.88	0.0557	0.216	ENSG00000268658	NA	long intergenic non-protein coding RNA 664 [Source:HGNC Symbol;Acc:HGNC:44319]
LRAT	90	0.00736	0.184	0.258	-3.88	8.83	34.3	ENSG00000121207	9227	lecithin retinol acyltransferase [Source:HGNC Symbol;Acc:HGNC:6685]
CLEC14A	2.88	0.0192	0.259	0.257	-3.89	0.245	0.954	ENSG00000176435	161198	C-type lectin domain containing 14A [Source:HGNC Symbol;Acc:HGNC:19832]
LINC00173	4.72	0.00594	0.169	0.257	-3.89	0.357	1.39	ENSG00000196668	NA	long intergenic non-protein coding RNA 173 [Source:HGNC Symbol;Acc:HGNC:33791]
MMP25	40.5	0.00329	0.137	0.257	-3.89	3.99	15.6	ENSG00000008516	64386	matrix metallopeptidase 25 [Source:HGNC Symbol;Acc:HGNC:14246]
GABRG2	1.72	0.0198	0.262	0.256	-3.91	0.111	0.435	ENSG00000113327	2566	gamma-aminobutyric acid type A receptor subunit gamma2 [Source:HGNC Symbol;Acc:HGNC:4087]
MEIOC	25.8	0.00767	0.184	0.256	-3.91	2.21	8.63	ENSG00000180336	284071	meiosis specific with coiled-coil domain [Source:HGNC Symbol;Acc:HGNC:26670]
CDH9	42.8	0.00825	0.189	0.255	-3.92	2.72	10.7	ENSG00000113100	1007	cadherin 9 [Source:HGNC Symbol;Acc:HGNC:1768]
SYN3	33.5	0.00184	0.111	0.255	-3.92	2.65	10.4	ENSG00000185666	8224	synapsin III [Source:HGNC Symbol;Acc:HGNC:11496]
RET	25.7	0.00441	0.154	0.253	-3.95	2.31	9.13	ENSG00000165731	5979	ret proto-oncogene [Source:HGNC Symbol;Acc:HGNC:9967]
ADAMTS16	38.8	0.000418	0.0715	0.251	-3.98	3.44	13.7	ENSG00000145536	170690	ADAM metallopeptidase with thrombospondin type 1 motif 16 [Source:HGNC Symbol;Acc:HGNC:17108]
M1AP	9.22	0.0297	0.303	0.251	-3.98	0.836	3.32	ENSG00000159374	130951	meiosis 1 associated protein [Source:HGNC Symbol;Acc:HGNC:25183]
LINC02381	24.9	0.00311	0.135	0.246	-4.07	2.13	8.67	ENSG00000250742	NA	long intergenic non-protein coding RNA 2381 [Source:HGNC Symbol;Acc:HGNC:53304]
ARHGAP19-SLIT1	3.94	0.0181	0.254	0.245	-4.08	0.331	1.35	ENSG00000269891	NA	ARHGAP19-SLIT1 readthrough (NMD candidate) [Source:HGNC Symbol;Acc:HGNC:48348]
TRIML2	14.7	0.00517	0.16	0.244	-4.1	1.41	5.79	ENSG00000179046	205860	tripartite motif family like 2 [Source:HGNC Symbol;Acc:HGNC:26378]
PNCK	36.3	0.00191	0.111	0.243	-4.11	2.88	11.9	ENSG00000130822	139728	pregnancy up-regulated nonubiquitous CaM kinase [Source:HGNC Symbol;Acc:HGNC:13415]
SLC18A2	3.77	0.0407	0.339	0.242	-4.14	0.322	1.33	ENSG00000165646	6571	solute carrier family 18 member A2 [Source:HGNC Symbol;Acc:HGNC:10935]
PPM1N	7.1	0.0417	0.34	0.241	-4.15	0.599	2.49	ENSG00000213889	147699	protein phosphatase, Mg2+/Mn2+ dependent 1N (putative) [Source:HGNC Symbol;Acc:HGNC:26845]
PIPOX	25.4	0.0149	0.235	0.24	-4.17	2.3	9.62	ENSG00000179761	51268	pipecolic acid and sarcosine oxidase [Source:HGNC Symbol;Acc:HGNC:17804]
SKOR2	2.04	0.0465	0.355	0.239	-4.19	0.164	0.685	ENSG00000215474	652991	SKI family transcriptional corepressor 2 [Source:HGNC Symbol;Acc:HGNC:32695]
KCNH1	9.74	0.0364	0.327	0.238	-4.2	0.512	2.15	ENSG00000143473	3756	potassium voltage-gated channel subfamily H member 1 [Source:HGNC Symbol;Acc:HGNC:6250]
GPR132	1.72	0.0349	0.324	0.238	-4.21	0.111	0.469	ENSG00000183484	29933	G protein-coupled receptor 132 [Source:HGNC Symbol;Acc:HGNC:17482]
CPNE7	21	0.00102	0.091	0.236	-4.24	1.73	7.32	ENSG00000178773	27132	copine 7 [Source:HGNC Symbol;Acc:HGNC:2320]
SLC66A3	44.5	0.000607	0.0789	0.235	-4.25	3.81	16.2	ENSG00000162976	130814	solute carrier family 66 member 3 [Source:HGNC Symbol;Acc:HGNC:28503]
CCDC92B	2.47	0.0129	0.222	0.235	-4.26	0.197	0.838	ENSG00000261963	NA	coiled-coil domain containing 92B [Source:HGNC Symbol;Acc:HGNC:52279]
SOX21	411	0.00224	0.12	0.235	-4.26	37.1	158	ENSG00000125285	11166	SRY-box transcription factor 21 [Source:HGNC Symbol;Acc:HGNC:11197]
PKIB	54.6	0.000124	0.0587	0.234	-4.28	4.85	20.7	ENSG00000135549	5570	cAMP-dependent protein kinase inhibitor beta [Source:HGNC Symbol;Acc:HGNC:9018]
MMP23B	9.61	0.006	0.17	0.233	-4.29	0.786	3.38	ENSG00000189409	8510	matrix metallopeptidase 23B [Source:HGNC Symbol;Acc:HGNC:7171]
MEG3	19.1	0.015	0.235	0.232	-4.31	1.76	7.58	ENSG00000214548	NA	maternally expressed 3 [Source:HGNC Symbol;Acc:HGNC:14575]
NRIP3	129	0.021	0.267	0.232	-4.31	7.87	33.9	ENSG00000175352	56675	nuclear receptor interacting protein 3 [Source:HGNC Symbol;Acc:HGNC:1167]
LINC01090	1.88	0.0374	0.329	0.231	-4.33	0.164	0.708	ENSG00000231689	NA	long intergenic non-protein coding RNA 1090 [Source:HGNC Symbol;Acc:HGNC:49201]
ASS1P11	3.3	0.00947	0.2	0.229	-4.37	0.245	1.07	ENSG00000225308	NA	argininosuccinate synthetase 1 pseudogene 11 [Source:HGNC Symbol;Acc:HGNC:761]
ARHGAP15	11.1	0.0136	0.227	0.228	-4.38	0.839	3.68	ENSG00000075884	55843	Rho GTPase activating protein 15 [Source:HGNC Symbol;Acc:HGNC:21030]
EGLN3	122	0.000408	0.0715	0.228	-4.39	8.4	36.9	ENSG00000129521	112399	egl-9 family hypoxia inducible factor 3 [Source:HGNC Symbol;Acc:HGNC:14661]
ASS1P1	7.03	0.00308	0.134	0.226	-4.43	0.598	2.65	ENSG00000220517	NA	argininosuccinate synthetase 1 pseudogene 1 [Source:HGNC Symbol;Acc:HGNC:759]
EGFL6	8.61	0.00441	0.154	0.226	-4.43	0.721	3.19	ENSG00000198759	25975	EGF like domain multiple 6 [Source:HGNC Symbol;Acc:HGNC:3235]
ROBO3	89.7	0.00465	0.156	0.224	-4.46	7.14	31.8	ENSG00000154134	64221	roundabout guidance receptor 3 [Source:HGNC Symbol;Acc:HGNC:13433]
ANPEP	25	0.00912	0.197	0.223	-4.48	2.1	9.43	ENSG00000166825	290	alanyl aminopeptidase, membrane [Source:HGNC Symbol;Acc:HGNC:500]
LHX5-AS1	99.2	0.00479	0.157	0.223	-4.49	6.2	27.8	ENSG00000257935	NA	LHX5 antisense RNA 1 [Source:HGNC Symbol;Acc:HGNC:49570]
HAND1	23.7	0.0213	0.268	0.22	-4.55	2.07	9.42	ENSG00000113196	9421	heart and neural crest derivatives expressed 1 [Source:HGNC Symbol;Acc:HGNC:4807]
SLC8A2	42.8	0.000866	0.0871	0.22	-4.55	3.24	14.8	ENSG00000118160	6543	solute carrier family 8 member A2 [Source:HGNC Symbol;Acc:HGNC:11069]
SOX15	65.8	0.00603	0.17	0.22	-4.55	5.7	26	ENSG00000129194	6665	SRY-box transcription factor 15 [Source:HGNC Symbol;Acc:HGNC:11196]
ADGRG2	16.5	0.00766	0.184	0.219	-4.58	1.3	5.97	ENSG00000173698	10149	adhesion G protein-coupled receptor G2 [Source:HGNC Symbol;Acc:HGNC:4516]
NMI	18.7	0.00517	0.16	0.215	-4.65	1.49	6.91	ENSG00000123609	9111	N-myc and STAT interactor [Source:HGNC Symbol;Acc:HGNC:7854]
SYT2	38.2	0.00055	0.0765	0.215	-4.66	2.76	12.8	ENSG00000143858	127833	synaptotagmin 2 [Source:HGNC Symbol;Acc:HGNC:11510]
PAX2	102	0.0102	0.204	0.214	-4.68	8.4	39.3	ENSG00000075891	5076	paired box 2 [Source:HGNC Symbol;Acc:HGNC:8616]
PDGFA	81.7	0.00236	0.123	0.214	-4.68	6.82	31.9	ENSG00000197461	5154	platelet derived growth factor subunit A [Source:HGNC Symbol;Acc:HGNC:8799]
CREB3L3	1.57	0.0372	0.328	0.212	-4.71	0.0854	0.402	ENSG00000060566	84699	cAMP responsive element binding protein 3 like 3 [Source:HGNC Symbol;Acc:HGNC:18855]
FGF19	20.9	0.00994	0.202	0.211	-4.73	1.77	8.36	ENSG00000162344	9965	fibroblast growth factor 19 [Source:HGNC Symbol;Acc:HGNC:3675]
VENTX	41.8	0.0384	0.333	0.21	-4.76	3.35	16	ENSG00000151650	27287	VENT homeobox [Source:HGNC Symbol;Acc:HGNC:13639]
IFITM1	289	0.00114	0.0953	0.209	-4.79	22.2	107	ENSG00000185885	8519	interferon induced transmembrane protein 1 [Source:HGNC Symbol;Acc:HGNC:5412]
TMOD1	11.6	0.00494	0.157	0.207	-4.84	0.843	4.08	ENSG00000136842	7111	tropomodulin 1 [Source:HGNC Symbol;Acc:HGNC:11871]
ESRG	480	0.0228	0.275	0.204	-4.9	39	191	ENSG00000265992	NA	embryonic stem cell related [Source:HGNC Symbol;Acc:HGNC:39079]
TRIM22	38.4	0.00552	0.165	0.204	-4.9	3.04	14.9	ENSG00000132274	10346	tripartite motif containing 22 [Source:HGNC Symbol;Acc:HGNC:16379]
ZNF585B	47.5	0.00144	0.104	0.203	-4.94	2.66	13.1	ENSG00000245680	92285	zinc finger protein 585B [Source:HGNC Symbol;Acc:HGNC:30948]
HES3	42.2	0.00737	0.184	0.201	-4.96	3.4	16.9	ENSG00000173673	390992	hes family bHLH transcription factor 3 [Source:HGNC Symbol;Acc:HGNC:26226]
KHDRBS2	2.08	0.0124	0.22	0.201	-4.98	0.167	0.832	ENSG00000112232	202559	KH RNA binding domain containing, signal transduction associated 2 [Source:HGNC Symbol;Acc:HGNC:18114]
PROK2	4.15	0.00772	0.185	0.201	-4.98	0.316	1.57	ENSG00000163421	60675	prokineticin 2 [Source:HGNC Symbol;Acc:HGNC:18455]
BCL6B	25.2	0.00146	0.104	0.2	-5.01	1.8	9.02	ENSG00000161940	255877	BCL6B transcription repressor [Source:HGNC Symbol;Acc:HGNC:1002]
LINC00337	5.32	0.0168	0.245	0.199	-5.04	0.401	2.02	ENSG00000225077	NA	long intergenic non-protein coding RNA 337 [Source:HGNC Symbol;Acc:HGNC:28620]
HCRTR2	2.54	0.0112	0.212	0.198	-5.06	0.19	0.96	ENSG00000137252	3062	hypocretin receptor 2 [Source:HGNC Symbol;Acc:HGNC:4849]
COX6B2	2.35	0.0334	0.317	0.197	-5.07	0.167	0.848	ENSG00000160471	125965	cytochrome c oxidase subunit 6B2 [Source:HGNC Symbol;Acc:HGNC:24380]
COCH	166	0.00497	0.157	0.196	-5.09	11.8	59.9	ENSG00000100473	1690	cochlin [Source:HGNC Symbol;Acc:HGNC:2180]
SHISA2	533	0.00998	0.202	0.196	-5.09	41.6	212	ENSG00000180730	387914	shisa family member 2 [Source:HGNC Symbol;Acc:HGNC:20366]
IFI35	4.04	0.0244	0.281	0.195	-5.12	0.275	1.41	ENSG00000068079	3430	interferon induced protein 35 [Source:HGNC Symbol;Acc:HGNC:5399]
HLA-DRA	4.89	0.0226	0.273	0.194	-5.16	0.364	1.88	ENSG00000228987	3122	major histocompatibility complex, class II, DR alpha [Source:HGNC Symbol;Acc:HGNC:4947]
HLA-DRA	4.89	0.0226	0.273	0.194	-5.16	0.364	1.88	ENSG00000226260	3122	major histocompatibility complex, class II, DR alpha [Source:HGNC Symbol;Acc:HGNC:4947]
HLA-DRA	4.89	0.0226	0.273	0.194	-5.16	0.364	1.88	ENSG00000206308	3122	major histocompatibility complex, class II, DR alpha [Source:HGNC Symbol;Acc:HGNC:4947]
HLA-DRA	4.89	0.0226	0.273	0.194	-5.16	0.364	1.88	ENSG00000204287	3122	major histocompatibility complex, class II, DR alpha [Source:HGNC Symbol;Acc:HGNC:4947]
HLA-DRA	4.89	0.0226	0.273	0.194	-5.16	0.364	1.88	ENSG00000227993	3122	major histocompatibility complex, class II, DR alpha [Source:HGNC Symbol;Acc:HGNC:4947]
HLA-DRA	4.89	0.0226	0.273	0.194	-5.16	0.364	1.88	ENSG00000234794	3122	major histocompatibility complex, class II, DR alpha [Source:HGNC Symbol;Acc:HGNC:4947]
HLA-DRA	4.89	0.0226	0.273	0.194	-5.16	0.364	1.88	ENSG00000230726	3122	major histocompatibility complex, class II, DR alpha [Source:HGNC Symbol;Acc:HGNC:4947]
PHLDA2	9.87	0.00686	0.179	0.193	-5.19	0.769	3.99	ENSG00000274538	7262	pleckstrin homology like domain family A member 2 [Source:HGNC Symbol;Acc:HGNC:12385]
PHLDA2	9.87	0.00686	0.179	0.193	-5.19	0.769	3.99	ENSG00000181649	7262	pleckstrin homology like domain family A member 2 [Source:HGNC Symbol;Acc:HGNC:12385]
TBX15	2.94	0.0329	0.315	0.192	-5.2	0.2	1.04	ENSG00000092607	6913	T-box transcription factor 15 [Source:HGNC Symbol;Acc:HGNC:11594]
LINC01351	1.45	0.0098	0.202	0.192	-5.22	0.0818	0.427	ENSG00000237457	NA	long intergenic non-protein coding RNA 1351 [Source:HGNC Symbol;Acc:HGNC:50577]
GRM4	150	0.0316	0.31	0.19	-5.25	8.38	44	ENSG00000124493	2914	glutamate metabotropic receptor 4 [Source:HGNC Symbol;Acc:HGNC:4596]
PCDHB6	2.26	0.0154	0.237	0.191	-5.25	0.164	0.858	ENSG00000113211	56130	protocadherin beta 6 [Source:HGNC Symbol;Acc:HGNC:8691]
POU3F1	291	0.000181	0.0594	0.187	-5.34	20.4	109	ENSG00000185668	5453	POU class 3 homeobox 1 [Source:HGNC Symbol;Acc:HGNC:9214]
PIK3R5	16.3	0.00827	0.189	0.185	-5.4	1.02	5.5	ENSG00000141506	23533	phosphoinositide-3-kinase regulatory subunit 5 [Source:HGNC Symbol;Acc:HGNC:30035]
LHFPL4	41.3	0.000981	0.0892	0.185	-5.41	2.71	14.6	ENSG00000156959	375323	LHFPL tetraspan subfamily member 4 [Source:HGNC Symbol;Acc:HGNC:29568]
NPAS2	17.2	0.00794	0.189	0.184	-5.43	1.2	6.54	ENSG00000170485	4862	neuronal PAS domain protein 2 [Source:HGNC Symbol;Acc:HGNC:7895]
PCDHB5	54.9	0.000883	0.0875	0.184	-5.45	4.2	22.9	ENSG00000113209	26167	protocadherin beta 5 [Source:HGNC Symbol;Acc:HGNC:8690]
TDRD1	1.59	0.0251	0.285	0.18	-5.55	0.115	0.638	ENSG00000095627	56165	tudor domain containing 1 [Source:HGNC Symbol;Acc:HGNC:11712]
TMEM271	1.79	0.0223	0.272	0.178	-5.62	0.115	0.647	ENSG00000273238	112441426	transmembrane protein 271 [Source:HGNC Symbol;Acc:HGNC:53639]
BARX1	3.41	0.0197	0.262	0.176	-5.67	0.219	1.24	ENSG00000131668	56033	BARX homeobox 1 [Source:HGNC Symbol;Acc:HGNC:955]
COL9A3	137	0.000219	0.0594	0.175	-5.71	9.54	54.5	ENSG00000092758	1299	collagen type IX alpha 3 chain [Source:HGNC Symbol;Acc:HGNC:2219]
CYP26C1	51.2	0.0364	0.327	0.17	-5.87	2.52	14.8	ENSG00000187553	340665	cytochrome P450 family 26 subfamily C member 1 [Source:HGNC Symbol;Acc:HGNC:20577]
LINC01356	17.6	0.0225	0.273	0.17	-5.89	1.2	7.06	ENSG00000215866	NA	long intergenic non-protein coding RNA 1356 [Source:HGNC Symbol;Acc:HGNC:50587]
PPP2R2C	62.9	0.00212	0.118	0.169	-5.9	4.29	25.3	ENSG00000074211	5522	protein phosphatase 2 regulatory subunit Bgamma [Source:HGNC Symbol;Acc:HGNC:9306]
TDRD5	1.72	0.0388	0.334	0.169	-5.9	0.111	0.658	ENSG00000162782	163589	tudor domain containing 5 [Source:HGNC Symbol;Acc:HGNC:20614]
CDA	7.24	0.0192	0.259	0.169	-5.92	0.502	2.97	ENSG00000158825	978	cytidine deaminase [Source:HGNC Symbol;Acc:HGNC:1712]
NFIX	5.21	0.0093	0.2	0.167	-5.99	0.334	2	ENSG00000008441	4784	nuclear factor I X [Source:HGNC Symbol;Acc:HGNC:7788]
C1QL4	1.73	0.00958	0.2	0.166	-6.01	0.0854	0.513	ENSG00000186897	338761	complement C1q like 4 [Source:HGNC Symbol;Acc:HGNC:31416]
OLFML3	247	0.000866	0.0871	0.165	-6.06	16.4	99.3	ENSG00000116774	56944	olfactomedin like 3 [Source:HGNC Symbol;Acc:HGNC:24956]
ZNF528-AS1	11.9	0.000698	0.0805	0.165	-6.07	0.758	4.6	ENSG00000269834	NA	ZNF528 antisense RNA 1 [Source:HGNC Symbol;Acc:HGNC:51305]
FAM71F1	9.57	0.00603	0.17	0.162	-6.18	0.609	3.76	ENSG00000135248	84691	family with sequence similarity 71 member F1 [Source:HGNC Symbol;Acc:HGNC:30704]
PKLR	2.12	0.0179	0.254	0.162	-6.18	0.138	0.856	ENSG00000262785	5313	pyruvate kinase L/R [Source:HGNC Symbol;Acc:HGNC:9020]
PKLR	2.12	0.0179	0.254	0.162	-6.18	0.138	0.856	ENSG00000143627	5313	pyruvate kinase L/R [Source:HGNC Symbol;Acc:HGNC:9020]
MICB	25.1	0.00281	0.129	0.161	-6.2	1.62	10.1	ENSG00000206449	4277	MHC class I polypeptide-related sequence B [Source:HGNC Symbol;Acc:HGNC:7091]
MICB	25.1	0.00281	0.129	0.161	-6.2	1.62	10.1	ENSG00000231179	4277	MHC class I polypeptide-related sequence B [Source:HGNC Symbol;Acc:HGNC:7091]
MICB	25.1	0.00281	0.129	0.161	-6.2	1.62	10.1	ENSG00000234218	4277	MHC class I polypeptide-related sequence B [Source:HGNC Symbol;Acc:HGNC:7091]
MICB	25.1	0.00281	0.129	0.161	-6.2	1.62	10.1	ENSG00000224378	4277	MHC class I polypeptide-related sequence B [Source:HGNC Symbol;Acc:HGNC:7091]
MICB	25.1	0.00281	0.129	0.161	-6.2	1.62	10.1	ENSG00000231372	4277	MHC class I polypeptide-related sequence B [Source:HGNC Symbol;Acc:HGNC:7091]
MICB	25.1	0.00281	0.129	0.161	-6.2	1.62	10.1	ENSG00000204516	4277	MHC class I polypeptide-related sequence B [Source:HGNC Symbol;Acc:HGNC:7091]
MICB	25.1	0.00281	0.129	0.161	-6.2	1.62	10.1	ENSG00000238289	4277	MHC class I polypeptide-related sequence B [Source:HGNC Symbol;Acc:HGNC:7091]
MICB	25.1	0.00281	0.129	0.161	-6.2	1.62	10.1	ENSG00000227772	4277	MHC class I polypeptide-related sequence B [Source:HGNC Symbol;Acc:HGNC:7091]
MYH2	1.35	0.00807	0.189	0.159	-6.3	0.0854	0.538	ENSG00000125414	4620	myosin heavy chain 2 [Source:HGNC Symbol;Acc:HGNC:7572]
PCDHGA10	110	0.000827	0.0852	0.159	-6.31	6.74	42.5	ENSG00000253846	56106	protocadherin gamma subfamily A, 10 [Source:HGNC Symbol;Acc:HGNC:8697]
LINC00698	5.23	0.0031	0.135	0.157	-6.38	0.338	2.16	ENSG00000244342	NA	long intergenic non-protein coding RNA 698 [Source:HGNC Symbol;Acc:HGNC:27720]
SCGB3A2	11.6	0.0232	0.277	0.157	-6.38	0.773	4.93	ENSG00000164265	117156	secretoglobin family 3A member 2 [Source:HGNC Symbol;Acc:HGNC:18391]
AGMO	1.35	0.0099	0.202	0.156	-6.43	0.0854	0.549	ENSG00000187546	392636	alkylglycerol monooxygenase [Source:HGNC Symbol;Acc:HGNC:33784]
DAZL	6.82	0.0147	0.234	0.154	-6.49	0.434	2.82	ENSG00000092345	1618	deleted in azoospermia like [Source:HGNC Symbol;Acc:HGNC:2685]
VSNL1	145	5.27e-05	0.0502	0.153	-6.55	8.86	58	ENSG00000163032	7447	visinin like 1 [Source:HGNC Symbol;Acc:HGNC:12722]
SPINK2	1.85	0.00987	0.202	0.152	-6.57	0.111	0.733	ENSG00000128040	6691	serine peptidase inhibitor Kazal type 2 [Source:HGNC Symbol;Acc:HGNC:11245]
JAML	1.85	0.0277	0.295	0.149	-6.72	0.111	0.749	ENSG00000160593	120425	junction adhesion molecule like [Source:HGNC Symbol;Acc:HGNC:19084]
NRN1L	0.956	0.049	0.364	0.146	-6.86	0.0557	0.382	ENSG00000188038	123904	neuritin 1 like [Source:HGNC Symbol;Acc:HGNC:29811]
PANCR	2.1	0.0146	0.233	0.144	-6.97	0.115	0.802	ENSG00000250103	NA	PITX2 adjacent non-coding RNA [Source:HGNC Symbol;Acc:HGNC:52282]
GAD1	59.1	0.000103	0.0555	0.142	-7.07	3.44	24.3	ENSG00000128683	2571	glutamate decarboxylase 1 [Source:HGNC Symbol;Acc:HGNC:4092]
BST2	147	0.000823	0.0852	0.141	-7.11	8.39	59.6	ENSG00000130303	684	bone marrow stromal cell antigen 2 [Source:HGNC Symbol;Acc:HGNC:1119]
SLC24A2	6.22	0.00257	0.126	0.138	-7.23	0.331	2.39	ENSG00000155886	25769	solute carrier family 24 member 2 [Source:HGNC Symbol;Acc:HGNC:10976]
GSX2	1.47	0.00744	0.184	0.136	-7.35	0.0818	0.601	ENSG00000180613	170825	GS homeobox 2 [Source:HGNC Symbol;Acc:HGNC:24959]
VWF	72.1	7.74e-05	0.0521	0.134	-7.45	4.05	30.2	ENSG00000110799	7450	von Willebrand factor [Source:HGNC Symbol;Acc:HGNC:12726]
ELFN2	19.6	0.00104	0.0917	0.132	-7.56	1.06	7.98	ENSG00000166897	114794	extracellular leucine rich repeat and fibronectin type III domain containing 2 [Source:HGNC Symbol;Acc:HGNC:29396]
CHRNB4	166	0.0022	0.119	0.132	-7.58	7.41	56.1	ENSG00000117971	1143	cholinergic receptor nicotinic beta 4 subunit [Source:HGNC Symbol;Acc:HGNC:1964]
DPEP3	9	0.00292	0.131	0.13	-7.69	0.513	3.95	ENSG00000141096	64180	dipeptidase 3 [Source:HGNC Symbol;Acc:HGNC:23029]
XIRP2	1.21	0.0169	0.245	0.13	-7.72	0.0557	0.43	ENSG00000163092	129446	xin actin binding repeat containing 2 [Source:HGNC Symbol;Acc:HGNC:14303]
NUTM1	2.62	0.00496	0.157	0.129	-7.77	0.138	1.07	ENSG00000184507	256646	NUT midline carcinoma family member 1 [Source:HGNC Symbol;Acc:HGNC:29919]
FUT3	1.15	0.014	0.229	0.126	-7.91	0.0557	0.441	ENSG00000171124	2525	fucosyltransferase 3 (Lewis blood group) [Source:HGNC Symbol;Acc:HGNC:4014]
IDO1	1.54	0.0121	0.217	0.126	-7.91	0.0818	0.647	ENSG00000131203	3620	indoleamine 2,3-dioxygenase 1 [Source:HGNC Symbol;Acc:HGNC:6059]
RIPPLY3	221	0.00697	0.18	0.126	-7.95	12	95.7	ENSG00000183145	53820	ripply transcriptional repressor 3 [Source:HGNC Symbol;Acc:HGNC:3047]
FIBCD1	30.3	0.0116	0.214	0.121	-8.24	1.6	13.2	ENSG00000130720	84929	fibrinogen C domain containing 1 [Source:HGNC Symbol;Acc:HGNC:25922]
TNN	13.3	0.00265	0.127	0.121	-8.27	0.672	5.56	ENSG00000120332	63923	tenascin N [Source:HGNC Symbol;Acc:HGNC:22942]
GALR1	1.98	0.00237	0.123	0.117	-8.54	0.0854	0.729	ENSG00000166573	2587	galanin receptor 1 [Source:HGNC Symbol;Acc:HGNC:4132]
WIF1	2.23	0.00711	0.181	0.115	-8.66	0.111	0.966	ENSG00000156076	11197	WNT inhibitory factor 1 [Source:HGNC Symbol;Acc:HGNC:18081]
ACOXL	15.3	0.00163	0.109	0.113	-8.84	0.743	6.57	ENSG00000153093	55289	acyl-CoA oxidase like [Source:HGNC Symbol;Acc:HGNC:25621]
CDH22	6.95	0.0257	0.287	0.112	-8.93	0.327	2.92	ENSG00000149654	64405	cadherin 22 [Source:HGNC Symbol;Acc:HGNC:13251]
SPTB	33.5	6.15e-05	0.0502	0.112	-8.93	1.61	14.4	ENSG00000070182	6710	spectrin beta, erythrocytic [Source:HGNC Symbol;Acc:HGNC:11274]
MLN	2.3	0.0348	0.323	0.112	-8.94	0.111	0.997	ENSG00000096395	4295	motilin [Source:HGNC Symbol;Acc:HGNC:7141]
PTGDR	1.41	0.0231	0.275	0.111	-9.01	0.0557	0.502	ENSG00000168229	5729	prostaglandin D2 receptor [Source:HGNC Symbol;Acc:HGNC:9591]
LINC01896	16.9	0.00108	0.0928	0.11	-9.07	0.631	5.72	ENSG00000262280	NA	long intergenic non-protein coding RNA 1896 [Source:HGNC Symbol;Acc:HGNC:52715]
LINC01896	16.9	0.00108	0.0928	0.11	-9.07	0.631	5.72	ENSG00000263146	NA	long intergenic non-protein coding RNA 1896 [Source:HGNC Symbol;Acc:HGNC:52715]
LINC01896	16.9	0.00108	0.0928	0.11	-9.07	0.631	5.72	ENSG00000282765	NA	long intergenic non-protein coding RNA 1896 [Source:HGNC Symbol;Acc:HGNC:52715]
PAMR1	503	0.000242	0.0594	0.109	-9.21	23.8	219	ENSG00000149090	25891	peptidase domain containing associated with muscle regeneration 1 [Source:HGNC Symbol;Acc:HGNC:24554]
LINC02334	2.49	0.0179	0.253	0.109	-9.22	0.111	1.03	ENSG00000274317	NA	long intergenic non-protein coding RNA 2334 [Source:HGNC Symbol;Acc:HGNC:53254]
PYGM	66.3	0.000163	0.0594	0.107	-9.37	2.75	25.8	ENSG00000068976	5837	glycogen phosphorylase, muscle associated [Source:HGNC Symbol;Acc:HGNC:9726]
FZD5	937	0.0314	0.31	0.106	-9.41	44.1	414	ENSG00000163251	7855	frizzled class receptor 5 [Source:HGNC Symbol;Acc:HGNC:4043]
ERVV-2	4.41	0.00546	0.164	0.105	-9.55	0.194	1.85	ENSG00000268964	100271846	endogenous retrovirus group V member 2, envelope [Source:HGNC Symbol;Acc:HGNC:39051]
LBX1	1.28	0.0101	0.204	0.105	-9.56	0.0557	0.533	ENSG00000138136	10660	ladybird homeobox 1 [Source:HGNC Symbol;Acc:HGNC:16960]
RASGRP2	19.8	0.000862	0.0871	0.101	-9.92	0.87	8.63	ENSG00000068831	10235	RAS guanyl releasing protein 2 [Source:HGNC Symbol;Acc:HGNC:9879]
CUZD1	3.5	0.00324	0.136	0.0989	-10.1	0.145	1.47	ENSG00000138161	50624	CUB and zona pellucida like domains 1 [Source:HGNC Symbol;Acc:HGNC:17937]
UPK1A	1.52	0.0113	0.212	0.0982	-10.2	0.0557	0.568	ENSG00000105668	11045	uroplakin 1A [Source:HGNC Symbol;Acc:HGNC:12577]
LINC01515	3.97	0.00167	0.109	0.0969	-10.3	0.171	1.76	ENSG00000228065	NA	long intergenic non-protein coding RNA 1515 [Source:HGNC Symbol;Acc:HGNC:51210]
LINC01515	3.97	0.00167	0.109	0.0969	-10.3	0.171	1.76	ENSG00000283079	NA	long intergenic non-protein coding RNA 1515 [Source:HGNC Symbol;Acc:HGNC:51210]
KCNK13	6.86	0.00165	0.109	0.0957	-10.5	0.279	2.91	ENSG00000152315	56659	potassium two pore domain channel subfamily K member 13 [Source:HGNC Symbol;Acc:HGNC:6275]
SHOX	3.98	0.0132	0.224	0.0952	-10.5	0.167	1.76	ENSG00000185960	6473	short stature homeobox [Source:HGNC Symbol;Acc:HGNC:10853]
ADAMTSL3	16	0.000914	0.0882	0.0937	-10.7	0.627	6.69	ENSG00000156218	57188	ADAMTS like 3 [Source:HGNC Symbol;Acc:HGNC:14633]
DMBX1	78	7.7e-05	0.0521	0.0937	-10.7	3.14	33.6	ENSG00000197587	127343	diencephalon/mesencephalon homeobox 1 [Source:HGNC Symbol;Acc:HGNC:19026]
ZNF717	10.4	0.000175	0.0594	0.0925	-10.8	0.416	4.5	ENSG00000227124	100131827	zinc finger protein 717 [Source:HGNC Symbol;Acc:HGNC:29448]
MEDAG	4.75	0.00736	0.184	0.0917	-10.9	0.186	2.03	ENSG00000102802	84935	mesenteric estrogen dependent adipogenesis [Source:HGNC Symbol;Acc:HGNC:25926]
TBX1	20.9	0.0127	0.222	0.092	-10.9	0.872	9.48	ENSG00000184058	6899	T-box transcription factor 1 [Source:HGNC Symbol;Acc:HGNC:11592]
FENDRR	2.1	0.0384	0.333	0.0879	-11.4	0.0818	0.93	ENSG00000268388	NA	FOXF1 adjacent non-coding developmental regulatory RNA [Source:HGNC Symbol;Acc:HGNC:43894]
LY6L	1.57	0.00368	0.144	0.0826	-12.1	0.0557	0.674	ENSG00000282693	101928108	lymphocyte antigen 6 family member L [Source:HGNC Symbol;Acc:HGNC:52284]
LY6L	1.57	0.00368	0.144	0.0826	-12.1	0.0557	0.674	ENSG00000261667	101928108	lymphocyte antigen 6 family member L [Source:HGNC Symbol;Acc:HGNC:52284]
NAP1L6P	7.63	0.000967	0.0892	0.0796	-12.6	0.279	3.5	ENSG00000204118	NA	nucleosome assembly protein 1 like 6, pseudogene [Source:HGNC Symbol;Acc:HGNC:31706]
PIWIL2	9.78	0.000352	0.0678	0.0782	-12.8	0.334	4.27	ENSG00000197181	55124	piwi like RNA-mediated gene silencing 2 [Source:HGNC Symbol;Acc:HGNC:17644]
LMO1	73.8	0.00141	0.103	0.0766	-13.1	2.58	33.7	ENSG00000166407	4004	LIM domain only 1 [Source:HGNC Symbol;Acc:HGNC:6641]
JAKMIP2-AS1	112	0.00579	0.167	0.0717	-14	3.7	51.6	ENSG00000280780	NA	JAKMIP2 antisense RNA 1 [Source:HGNC Symbol;Acc:HGNC:27203]
LINC00545	2.73	0.00826	0.189	0.0688	-14.5	0.0854	1.24	ENSG00000236094	NA	long intergenic non-protein coding RNA 545 [Source:HGNC Symbol;Acc:HGNC:43680]
ALDH1A2	32.9	0.00975	0.202	0.0682	-14.7	0.894	13.1	ENSG00000128918	8854	aldehyde dehydrogenase 1 family member A2 [Source:HGNC Symbol;Acc:HGNC:15472]
HOXC4	7.29	0.0139	0.228	0.0635	-15.8	0.204	3.22	ENSG00000198353	3221	homeobox C4 [Source:HGNC Symbol;Acc:HGNC:5126]
ADGRG3	2.11	0.00113	0.0945	0.06	-16.7	0.0557	0.93	ENSG00000182885	222487	adhesion G protein-coupled receptor G3 [Source:HGNC Symbol;Acc:HGNC:13728]
PPP1R1B	54.2	0.00757	0.184	0.0531	-18.8	1.34	25.2	ENSG00000131771	84152	protein phosphatase 1 regulatory inhibitor subunit 1B [Source:HGNC Symbol;Acc:HGNC:9287]
PITX2	51.7	8.85e-05	0.0521	0.0512	-19.5	1.24	24.2	ENSG00000164093	5308	paired like homeodomain 2 [Source:HGNC Symbol;Acc:HGNC:9005]
POU2F3	29.9	0.00253	0.126	0.0514	-19.5	0.71	13.8	ENSG00000137709	25833	POU class 2 homeobox 3 [Source:HGNC Symbol;Acc:HGNC:19864]
LMLN2	4.23	0.0138	0.227	0.0416	-24.1	0.0818	1.97	ENSG00000283654	100128908	leishmanolysin like peptidase 2 [Source:HGNC Symbol;Acc:HGNC:53647]
HESX1	42.9	0.0402	0.337	0.0413	-24.2	0.828	20.1	ENSG00000163666	8820	HESX homeobox 1 [Source:HGNC Symbol;Acc:HGNC:4877]
LINC02582	6.01	0.00834	0.189	0.0394	-25.4	0.111	2.83	ENSG00000261780	NA	long intergenic non-protein coding RNA 2582 [Source:HGNC Symbol;Acc:HGNC:53792]
DPPA3	12.4	0.0244	0.281	0.0379	-26.4	0.223	5.88	ENSG00000187569	359787	developmental pluripotency associated 3 [Source:HGNC Symbol;Acc:HGNC:19199]
SEZ6	80.4	0.00085	0.0868	0.0315	-31.8	1.21	38.5	ENSG00000063015	124925	seizure related 6 homolog [Source:HGNC Symbol;Acc:HGNC:15955]
HHEX	26.5	0.0102	0.204	0.0233	-42.9	0.297	12.8	ENSG00000152804	3087	hematopoietically expressed homeobox [Source:HGNC Symbol;Acc:HGNC:4901]
ZNF804B	5.3	0.000125	0.0587	0.0225	-44.4	0.0557	2.48	ENSG00000182348	219578	zinc finger protein 804B [Source:HGNC Symbol;Acc:HGNC:21958]
