# Supplementary material for: The autism-associated gene SYNGAP1 regulates human cortical neurogenesis
Source: Research Square preprint supplement (doi:10.21203/rs.3.rs-1610145/v1), 2022-05-10
Supplement: Supplementary file 4 [file 882ed2ddcde14156a803e3fb.xlsx]

## Sheet: SynGO
Gene list input	gene hgnc_id	gene symbol	gene name	gene synonyms
AAK1	HGNC:19679	AAK1	AP2 associated kinase 1	KIAA1048,DKFZP686K16132
ABHD17B	HGNC:24278	ABHD17B	abhydrolase domain containing 17B, depalmitoylase	CGI-67,C9ORF77,FAM108B1
ABHD6	HGNC:21398	ABHD6	abhydrolase domain containing 6, acylglycerol lipase
ABI1	HGNC:11320	ABI1	abl interactor 1	E3B1,ABI-1,SSH3BP1
ABI2	HGNC:24011	ABI2	abl interactor 2	ABI-2,AIP-1,ABI2B,ABLBP3,ARGBPIA,SSH3BP2
ABL1	HGNC:76	ABL1	ABL proto-oncogene 1, non-receptor tyrosine kinase	JTK7,C-ABL,P150,ABL
ABL2	HGNC:77	ABL2	ABL proto-oncogene 2, non-receptor tyrosine kinase	ARG,ABLL
ABR	HGNC:81	ABR	ABR activator of RhoGEF and GTPase	MDB
ACTBL2	HGNC:17780	ACTBL2	actin beta like 2	DKFZP686D0972
ACTC1	HGNC:143	ACTC1	actin alpha cardiac muscle 1	CMD1R,ACTC
ACTG1	HGNC:144	ACTG1	actin gamma 1	ACTG,DFNA20,DFNA26
ACTN1	HGNC:163	ACTN1	actinin alpha 1
ACTN2	HGNC:164	ACTN2	actinin alpha 2
ACTR2	HGNC:169	ACTR2	actin related protein 2	ARP2
ACTR3	HGNC:170	ACTR3	actin related protein 3	ARP3
ADAM10	HGNC:188	ADAM10	ADAM metallopeptidase domain 10	KUZ,MADM,HST18717,CD156C
ADD1	HGNC:243	ADD1	adducin 1
ADD2	HGNC:244	ADD2	adducin 2	ADDB
ADD3	HGNC:245	ADD3	adducin 3	ADDL
ADGRL1	HGNC:20973	ADGRL1	adhesion G protein-coupled receptor L1	KIAA0821,CIRL1,LEC2,LPHN1
ADGRL2	HGNC:18582	ADGRL2	adhesion G protein-coupled receptor L2	KIAA0786,LEC1,LPHH1,LPHN2
ADGRL3	HGNC:20974	ADGRL3	adhesion G protein-coupled receptor L3	KIAA0768,LEC3,LPHN3
AGAP3	HGNC:16923	AGAP3	ArfGAP with GTPase domain, ankyrin repeat and PH domain 3	CENTG3
AGRN	HGNC:329	AGRN	agrin	AGRIN
AKAP1	HGNC:367	AKAP1	A-kinase anchoring protein 1	AKAP121,AKAP149,SAKAP84,S-AKAP84,AKAP84,D-AKAP1,PPP1R43,TDRD17,PRKA1
AKAP12	HGNC:370	AKAP12	A-kinase anchoring protein 12	AKAP250,SSECKS
AKAP7	HGNC:377	AKAP7	A-kinase anchoring protein 7	AKAP18,AKAP15
AKAP9	HGNC:379	AKAP9	A-kinase anchoring protein 9	KIAA0803,AKAP350,AKAP450,CG-NAP,YOTIAO,HYPERION,PRKA9,MU-RMS-40.16A,PPP1R45,LQT11
AKR1A1	HGNC:380	AKR1A1	aldo-keto reductase family 1 member A1	ALR,DD3
AKT1	HGNC:391	AKT1	AKT serine/threonine kinase 1	RAC,PKB,PRKBA,AKT,RAC-ALPHA
ALDOC	HGNC:418	ALDOC	aldolase, fructose-bisphosphate C
AMPH	HGNC:471	AMPH	amphiphysin
ANO6	HGNC:25240	ANO6	anoctamin 6	DKFZP313M0720,TMEM16F
ANXA1	HGNC:533	ANXA1	annexin A1	ANX1,LPC1
ANXA5	HGNC:543	ANXA5	annexin A5	ENX2,ANX5
AP1G1	HGNC:555	AP1G1	adaptor related protein complex 1 subunit gamma 1	CLAPG1,ADTG
AP1S2	HGNC:560	AP1S2	adaptor related protein complex 1 subunit sigma 2	SIGMA1B,MRX59,MRXS5,PGS
AP2B1	HGNC:563	AP2B1	adaptor related protein complex 2 subunit beta 1	ADTB2,CLAPB1
AP2M1	HGNC:564	AP2M1	adaptor related protein complex 2 subunit mu 1	AP50,MU2,CLAPM1
AP2S1	HGNC:565	AP2S1	adaptor related protein complex 2 subunit sigma 1	FBHOK,FBH3,CLAPS2,HHC3
AP3D1	HGNC:568	AP3D1	adaptor related protein complex 3 subunit delta 1	ADTD
APBA2	HGNC:579	APBA2	amyloid beta precursor protein binding family A member 2	D15S1518E,LIN-10,MGC:14091,HST16821,X11L,MINT2
APBB1	HGNC:581	APBB1	amyloid beta precursor protein binding family B member 1	FE65,RIR
APH1A	HGNC:29509	APH1A	aph-1 homolog A, gamma-secretase subunit	APH-1A,CGI-78
APLP2	HGNC:598	APLP2	amyloid beta precursor like protein 2	APPH,APPL2
APPL2	HGNC:598	APLP2	amyloid beta precursor like protein 2	APPH,APPL2
APOA4	HGNC:602	APOA4	apolipoprotein A4
APOE	HGNC:613	APOE	apolipoprotein E	AD2
APP	HGNC:620	APP	amyloid beta precursor protein	AD1
APPL1	HGNC:24035	APPL1	adaptor protein, phosphotyrosine interacting with PH domain and leucine zipper 1	APPL
ARF4	HGNC:655	ARF4	ADP ribosylation factor 4	ARF2
ARF6	HGNC:659	ARF6	ADP ribosylation factor 6
ARFGAP1	HGNC:15852	ARFGAP1	ADP ribosylation factor GTPase activating protein 1	FLJ10767,BA261N11.3,ARF1GAP
ARFGAP3	HGNC:661	ARFGAP3	ADP ribosylation factor GTPase activating protein 3	ARFGAP1
ARFGEF2	HGNC:15853	ARFGEF2	ADP ribosylation factor guanine nucleotide exchange factor 2	BIG2
ARHGAP39	HGNC:29351	ARHGAP39	Rho GTPase activating protein 39	KIAA1688,VILSE,CRGAP
ARHGAP44	HGNC:29096	ARHGAP44	Rho GTPase activating protein 44	KIAA0672,RICH-2,RICH2
ARHGDIA	HGNC:678	ARHGDIA	Rho GDP dissociation inhibitor alpha	RHOGDI,GDIA1
ARHGEF2	HGNC:682	ARHGEF2	Rho/Rac guanine nucleotide exchange factor 2	LFP40,GEF-H1,KIAA0651,P40,LFC,GEFH1
ARHGEF7	HGNC:15607	ARHGEF7	Rho guanine nucleotide exchange factor 7	KIAA0142,PIXB,DKFZP761K1021,NBLA10314,DKFZP686C12170,BETA-PIX,COOL1,P85SPR,P85,P85COOL1,P50BP,PAK3,P50
ARL6IP5	HGNC:16937	ARL6IP5	ADP ribosylation factor like GTPase 6 interacting protein 5	PRAF3,JWA,GTRAP3-18,DERP11,HSPC127,YIP6B
ARL8B	HGNC:25564	ARL8B	ADP ribosylation factor like GTPase 8B	FLJ10702,GIE1,ARL10C
ARPC2	HGNC:705	ARPC2	actin related protein 2/3 complex subunit 2	P34-ARC,ARC34
ARPC5L	HGNC:23366	ARPC5L	actin related protein 2/3 complex subunit 5 like	MGC3038,ARC16-2
ARRB2	HGNC:712	ARRB2	arrestin beta 2	BARR2,DKFZP686L0365,ARR2
ASAP1	HGNC:2720	ASAP1	ArfGAP with SH3 domain, ankyrin repeat and PH domain 1	PAP,KIAA1249,ZG14P,CENTB4,DDEF1
ATAD1	HGNC:25903	ATAD1	ATPase family AAA domain containing 1	FLJ14600,MSP1
ATG9A	HGNC:22408	ATG9A	autophagy related 9A	FLJ22169,APG9L1
ATP1A3	HGNC:801	ATP1A3	ATPase Na+/K+ transporting subunit alpha 3	DYT12
ATP2B1	HGNC:814	ATP2B1	ATPase plasma membrane Ca2+ transporting 1	PMCA1
ATP2B2	HGNC:815	ATP2B2	ATPase plasma membrane Ca2+ transporting 2	PMCA2
ATP2B4	HGNC:817	ATP2B4	ATPase plasma membrane Ca2+ transporting 4	PMCA4,ATP2B2,MXRA1
ATP6AP1	HGNC:868	ATP6AP1	ATPase H+ transporting accessory protein 1	ORF,XAP-3,VATPS1,16A,AC45,XAP3,CF2,ATP6S1,ATP6IP1
ATP6AP2	HGNC:18305	ATP6AP2	ATPase H+ transporting accessory protein 2	M8-9,APT6M8-9,ATP6M8-9,PRR,RENR,ATP6IP2
ATP6V0A1	HGNC:865	ATP6V0A1	ATPase H+ transporting V0 subunit a1	A1,VPH1,STV1,VPP1,ATP6N1,ATP6N1A
ATP6V0D1	HGNC:13724	ATP6V0D1	ATPase H+ transporting V0 subunit d1	ATP6DV,VATX,VPATPD,P39,VMA6,ATP6D
ATP6V1A	HGNC:851	ATP6V1A	ATPase H+ transporting V1 subunit A	VMA1,VA68,VPP2,ATP6A1,ATP6V1A1
ATP6V1B2	HGNC:854	ATP6V1B2	ATPase H+ transporting V1 subunit B2	VATB,VMA2,HO57,VPP3,ATP6B2
ATP6V1C1	HGNC:856	ATP6V1C1	ATPase H+ transporting V1 subunit C1	VATC,VMA5,ATP6D,ATP6C
ATP6V1D	HGNC:13527	ATP6V1D	ATPase H+ transporting V1 subunit D	VATD,VMA8,ATP6M
ATP6V1E1	HGNC:857	ATP6V1E1	ATPase H+ transporting V1 subunit E1	P31,VMA4,ATP6E2,ATP6E,ATP6V1E
ATP6V1F	HGNC:16832	ATP6V1F	ATPase H+ transporting V1 subunit F	ATP6S14,VATF,VMA7
ATP6V1G1	HGNC:864	ATP6V1G1	ATPase H+ transporting V1 subunit G1	ATP6GL,VMA10,ATP6G,DKFZP547P234,ATP6J,ATP6G1
ATP6V1G2	HGNC:862	ATP6V1G2	ATPase H+ transporting V1 subunit G2	VMA10,NG38,EM:AC004181.3,ATP6G,ATP6G2
ATP6V1H	HGNC:18303	ATP6V1H	ATPase H+ transporting V1 subunit H	CGI-11,SFD,VMA13,SFDALPHA,SFDBETA
ATP8A1	HGNC:13531	ATP8A1	ATPase phospholipid transporting 8A1	ATPIA
AURKA	HGNC:11393	AURKA	aurora kinase A	BTAK,AURA,STK7,ARK1,PPP1R47,AIK,STK15,STK6
AXIN1	HGNC:903	AXIN1	axin 1	PPP1R49
BAIAP2	HGNC:947	BAIAP2	BAR/IMD domain containing adaptor protein 2	BAP2,IRSP53,WAML
BCR	HGNC:1014	BCR	BCR activator of RhoGEF and GTPase	D22S662,CML,PHL,ALL,D22S11,BCR1
BIN1	HGNC:1052	BIN1	bridging integrator 1	SH3P9,AMPH2,AMPHL
BLOC1S1	HGNC:4200	BLOC1S1	biogenesis of lysosomal organelles complex 1 subunit 1	BLOS1,BORCS1,GCN5L1
BLOC1S6	HGNC:8549	BLOC1S6	biogenesis of lysosomal organelles complex 1 subunit 6	HPS9,PA,PLDN
BTBD9	HGNC:21228	BTBD9	BTB domain containing 9	KIAA1880,DJ322I12.1
C1QBP	HGNC:1243	C1QBP	complement C1q binding protein	GC1Q-R,GC1QR,P32,SF2P32,HABP1
CACNA1H	HGNC:1395	CACNA1H	calcium voltage-gated channel subunit alpha1 H	CAV3.2
CACNA2D1	HGNC:1399	CACNA2D1	calcium voltage-gated channel auxiliary subunit alpha2delta 1	LNCRNA-N3,CACNL2A,CACNA2,MHS3,LINC01112
CACNB1	HGNC:1401	CACNB1	calcium voltage-gated channel auxiliary subunit beta 1	CACNLB1
CADM1	HGNC:5951	CADM1	cell adhesion molecule 1	NECL2,ST17,BL2,SYNCAM,IGSF4A,NECL-2,SYNCAM1,RA175,TSLC1,IGSF4
CADM3	HGNC:17601	CADM3	cell adhesion molecule 3	BIGR,FLJ10698,TSLL1,NECL1,SYNCAM3,NECL-1,IGSF4B
CADPS	HGNC:1426	CADPS	calcium dependent secretion activator	CAPS,KIAA1121,CAPS1,UNC-31
CAPS	HGNC:1426	CADPS	calcium dependent secretion activator	CAPS,KIAA1121,CAPS1,UNC-31
CALB1	HGNC:1434	CALB1	calbindin 1	CALB
CALD1	HGNC:1441	CALD1	caldesmon 1	CDM,H-CAD,L-CAD
CAMK1	HGNC:1459	CAMK1	calcium/calmodulin dependent protein kinase I	CAMKI,CAMKI-ALPHA
CAMK2A	HGNC:1460	CAMK2A	calcium/calmodulin dependent protein kinase II alpha	KIAA0968,CAMKIINALPHA,CAMKIIΑ,CAMKA
CAMK4	HGNC:1464	CAMK4	calcium/calmodulin dependent protein kinase IV	CAMK-GR,CAMKIV
CAMKV	HGNC:28788	CAMKV	CaM kinase like vesicle associated	MGC8407,VACAMKL
CANX	HGNC:1473	CANX	calnexin	CNX,IP90,P90
CAP2	HGNC:20039	CAP2	cyclase associated actin cytoskeleton regulatory protein 2
CAPRIN1	HGNC:6743	CAPRIN1	cell cycle associated protein 1	CAPRIN-1,RNG105,M11S1,GPIAP1
CAPZB	HGNC:1491	CAPZB	capping actin protein of muscle Z-line subunit beta
CASK	HGNC:1497	CASK	calcium/calmodulin dependent serine protein kinase	LIN2,CAGH39,FGS4,TNRC8
CASKIN1	HGNC:20879	CASKIN1	CASK interacting protein 1	KIAA1306,ANKS5A
CD2AP	HGNC:14258	CD2AP	CD2 associated protein	CMS
CDC42	HGNC:1736	CDC42	cell division cycle 42	G25K,CDC42HS
CDH11	HGNC:1750	CDH11	cadherin 11	OB,CAD11
CDH2	HGNC:1759	CDH2	cadherin 2	CDHN,CD325,NCAD
CDH6	HGNC:1765	CDH6	cadherin 6
CDK5	HGNC:1774	CDK5	cyclin dependent kinase 5	PSSALRE
CDKL5	HGNC:11411	CDKL5	cyclin dependent kinase like 5	EIEE2,CFAP247,STK9
CFL1	HGNC:1874	CFL1	cofilin 1	CFL
CHD4	HGNC:1919	CHD4	chromodomain helicase DNA binding protein 4	MI-2B,MI2-BETA
CHMP2B	HGNC:24537	CHMP2B	charged multivesicular body protein 2B	DKFZP564O123,CHMP2.5,VPS2B
CLEC3B	HGNC:11891	CLEC3B	C-type lectin domain family 3 member B	TN,TNA
CLPTM1	HGNC:2087	CLPTM1	CLPTM1 regulator of GABA type A receptor forward trafficking
CLSTN1	HGNC:17447	CLSTN1	calsyntenin 1	CSTN1,KIAA0911,CDHR12
CLTA	HGNC:2090	CLTA	clathrin light chain A	LCA
CLTB	HGNC:2091	CLTB	clathrin light chain B	LCB
CLTC	HGNC:2092	CLTC	clathrin heavy chain	HC,CLTCL2
CLU	HGNC:2095	CLU	clusterin	SGP-2,SP-40,TRPM-2,KUB1,CLU1,CLU2,CLI,APOJ
CNKSR2	HGNC:19701	CNKSR2	connector enhancer of kinase suppressor of Ras 2	KIAA0902,CNK2,KSR2
CNN3	HGNC:2157	CNN3	calponin 3
CNTN1	HGNC:2171	CNTN1	contactin 1	F3,GP135
CNTN2	HGNC:2172	CNTN2	contactin 2	TAG-1,TAX1,TAX,AXT
CNTN6	HGNC:2176	CNTN6	contactin 6	NB-3
CNTNAP1	HGNC:8011	CNTNAP1	contactin associated protein 1	P190,CASPR,CNTNAP,NRXN4
COMT	HGNC:2228	COMT	catechol-O-methyltransferase
CORO1A	HGNC:2252	CORO1A	coronin 1A	HCORO1,P57,CORONIN-1
CPSF2	HGNC:2325	CPSF2	cleavage and polyadenylation specific factor 2	KIAA1367,CPSF100
CPT1C	HGNC:18540	CPT1C	carnitine palmitoyltransferase 1C	FLJ23809,CPTIC,CPT1P,CATL1
CRIPT	HGNC:14312	CRIPT	CXXC repeat containing interactor of PDZ3 domain	HSPC139
CRK	HGNC:2362	CRK	CRK proto-oncogene, adaptor protein
CRKL	HGNC:2363	CRKL	CRK like proto-oncogene, adaptor protein
CRTC1	HGNC:16062	CRTC1	CREB regulated transcription coactivator 1	KIAA0616,FLJ14027,TORC1,MECT1
CSNK2B	HGNC:2460	CSNK2B	casein kinase 2 beta	CKB1,CKB2
CTBP1	HGNC:2494	CTBP1	C-terminal binding protein 1	BARS
CTBP2	HGNC:2495	CTBP2	C-terminal binding protein 2	RIBEYE
CTNNA2	HGNC:2510	CTNNA2	catenin alpha 2	CAP-R,CT114
CTNNB1	HGNC:2514	CTNNB1	catenin beta 1	BETA-CATENIN,ARMADILLO,CTNNB
CTNND1	HGNC:2515	CTNND1	catenin delta 1	KIAA0384,P120,P120CAS,P120CTN,CTNND
CTNND2	HGNC:2516	CTNND2	catenin delta 2	NPRAP,GT24
CTSD	HGNC:2529	CTSD	cathepsin D	CLN10,CPSD
CTTN	HGNC:3338	CTTN	cortactin	EMS1
CTTNBP2	HGNC:15679	CTTNBP2	cortactin binding protein 2	KIAA1758,ORF4,CORTBP2,C7ORF8
CUL3	HGNC:2553	CUL3	cullin 3
CYFIP1	HGNC:13759	CYFIP1	cytoplasmic FMR1 interacting protein 1	KIAA0068,P140SRA-1,SHYC
CYFIP2	HGNC:13760	CYFIP2	cytoplasmic FMR1 interacting protein 2	PIR121
CYTH1	HGNC:9501	CYTH1	cytohesin 1	B2-1,D17S811E,CYTOHESIN-1,PSCD1
CYTH2	HGNC:9502	CYTH2	cytohesin 2	CTS18.1,SEC7P-L,ARNO,SEC7P-LIKE,CYTOHESIN-2,PSCD2L,PSCD2
DACT1	HGNC:17748	DACT1	dishevelled binding antagonist of beta catenin 1	DAPPER1,THYEX3,HDPR1,DAPPER,FRODO
DAG1	HGNC:2666	DAG1	dystroglycan 1	A3A,156DAG,AGRNR,DAG
DAPK1	HGNC:2674	DAPK1	death associated protein kinase 1	DAPK,ROCO3
DBN1	HGNC:2695	DBN1	drebrin 1	D0S117E
DBNL	HGNC:2696	DBNL	drebrin like	SH3P7,HIP-55,ABP1
DCC	HGNC:2701	DCC	DCC netrin 1 receptor	IGDCC1,NTN1R1
DGCR8	HGNC:2847	DGCR8	DGCR8 microprocessor complex subunit	DGCRK6,GY1,PASHA,C22ORF12
DGKE	HGNC:2852	DGKE	diacylglycerol kinase epsilon	DAGK6,DGK
DGKI	HGNC:2855	DGKI	diacylglycerol kinase iota	DGK-IOTA
DGKQ	HGNC:2856	DGKQ	diacylglycerol kinase theta	DAGK,DAGK7,DAGK4
DGKZ	HGNC:2857	DGKZ	diacylglycerol kinase zeta	DAGK5,HDGKZETA,DGK-ZETA,DAGK6
DIAPH1	HGNC:2876	DIAPH1	diaphanous related formin 1	HDIA1,LFHL1,DFNA1
DICER1	HGNC:17098	DICER1	dicer 1, ribonuclease III	DICER,KIAA0928,K12H4.8-LIKE,HERNA,MNG1
DLG1	HGNC:2900	DLG1	discs large MAGUK scaffold protein 1	SAP97,SAP-97,HDLG,DLGH1,DJ1061C18.1.1
DLG3	HGNC:2902	DLG3	discs large MAGUK scaffold protein 3	NE-DLG,SAP102,SAP-102,NEDLG,KIAA1232,MRX90,PPP1R82
DLG4	HGNC:2903	DLG4	discs large MAGUK scaffold protein 4	PSD-95,PSD95,SAP90,SAP-90
DLG5	HGNC:2904	DLG5	discs large MAGUK scaffold protein 5	P-DLG,KIAA0583
DLGAP1	HGNC:2905	DLGAP1	DLG associated protein 1	GKAP,SAPAP1,DAP-1
DAP3	HGNC:30368	DLGAP3	DLG associated protein 3	SAPAP3,DAP3
DLGAP4	HGNC:24476	DLGAP4	DLG associated protein 4	DAP4,KIAA0964,SAPAP4
DMD	HGNC:2928	DMD	dystrophin	BMD,DXS142,DXS164,DXS206,DXS230,DXS239,DXS268,DXS269,DXS270,DXS272,MRX85
DMXL2	HGNC:2938	DMXL2	Dmx like 2	RC3,KIAA0856,DFNA71
DNAJB1	HGNC:5270	DNAJB1	DnaJ heat shock protein family (Hsp40) member B1	HSP40,SIS1,RSPH16B,HSPF1
DNAJC5	HGNC:16235	DNAJC5	DnaJ heat shock protein family (Hsp40) member C5	FLJ00118,FLJ13070,DNAJC5A,CLN4
DNAJC6	HGNC:15469	DNAJC6	DnaJ heat shock protein family (Hsp40) member C6	KIAA0473,PARK19
DNM1	HGNC:2972	DNM1	dynamin 1	DNM
DNM1L	HGNC:2973	DNM1L	dynamin 1 like	DRP1,DVLP,HDYNIV,DYMPLE,VPS1
DNM2	HGNC:2974	DNM2	dynamin 2	DYNII,DYN2,CMTDIB,CMTDI1,DI-CMTB,CMT2M
DNM3	HGNC:29125	DNM3	dynamin 3	KIAA0820
DOCK1	HGNC:2987	DOCK1	dedicator of cytokinesis 1	DOCK180,CED5
DOCK10	HGNC:23479	DOCK10	dedicator of cytokinesis 10	ZIZ3,KIAA0694
DOCK7	HGNC:19190	DOCK7	dedicator of cytokinesis 7	KIAA1771,ZIR2
DPYSL2	HGNC:3014	DPYSL2	dihydropyrimidinase like 2	DRP-2,DHPRP2,CRMP2,DRP2
DPYSL3	HGNC:3015	DPYSL3	dihydropyrimidinase like 3	DRP-3,ULIP,CRMP4
DRD4	HGNC:3025	DRD4	dopamine receptor D4
DROSHA	HGNC:17904	DROSHA	drosha ribonuclease III	RNASE3L,ETOHI2,HSA242976,RN3,RNASEN
DVL1	HGNC:3084	DVL1	dishevelled segment polarity protein 1
DVL3	HGNC:3087	DVL3	dishevelled segment polarity protein 3	KIAA0208
DYNLL2	HGNC:24596	DYNLL2	dynein light chain LC8-type 2	MGC17810,DLC2,DNCL1B,RSPH22
EEA1	HGNC:3185	EEA1	early endosome antigen 1	ZFYVE2
EEF1D	HGNC:3211	EEF1D	eukaryotic translation elongation factor 1 delta	EF-1D,FLJ20897
EEF2	HGNC:3214	EEF2	eukaryotic translation elongation factor 2	EEF-2,EF2
EEF2K	HGNC:24615	EEF2K	eukaryotic elongation factor 2 kinase	EEF-2K,CAMKIII
EFNA5	HGNC:3225	EFNA5	ephrin A5	AF1,LERK7,EPLG7
EFNB1	HGNC:3226	EFNB1	ephrin B1	LERK2,ELK-L,EPLG2,CFNS
EFNB2	HGNC:3227	EFNB2	ephrin B2	LERK5,HTK-L,HTKL,MGC126226,MGC126227,MGC126228,EPLG5
EFNB3	HGNC:3228	EFNB3	ephrin B3	LERK-8,EPLG8
EGLN1	HGNC:1232	EGLN1	egl-9 family hypoxia inducible factor 1	SM-20,PHD2,ZMYND6,HIFPH2,C1ORF12
EHD1	HGNC:3242	EHD1	EH domain containing 1	H-PAST,HPAST1,FLJ42622,FLJ44618,PAST1
EIF1AX	HGNC:3250	EIF1AX	eukaryotic translation initiation factor 1A X-linked	EIF-1A,EIF-4C,EIF4C,EIF1A
EIF2B2	HGNC:3258	EIF2B2	eukaryotic translation initiation factor 2B subunit beta	EIF2B,EIF-2BBETA
EIF2A	HGNC:3265	EIF2S1	eukaryotic translation initiation factor 2 subunit alpha	EIF-2ALPHA,EIF2A,EIF2
EIF2S1	HGNC:3265	EIF2S1	eukaryotic translation initiation factor 2 subunit alpha	EIF-2ALPHA,EIF2A,EIF2
EIF2S2	HGNC:3266	EIF2S2	eukaryotic translation initiation factor 2 subunit beta	EIF2BETA,PPP1R67,EIF2
EIF2S3	HGNC:3267	EIF2S3	eukaryotic translation initiation factor 2 subunit gamma	EIF2GAMMA,EIF2,EIF2G
EIF3A	HGNC:3271	EIF3A	eukaryotic translation initiation factor 3 subunit A	EIF3-THETA,EIF3-P170,KIAA0139,TIF32,EIF3,EIF3S10
EIF3B	HGNC:3280	EIF3B	eukaryotic translation initiation factor 3 subunit B	PRT1,EIF3S9
EIF3D	HGNC:3278	EIF3D	eukaryotic translation initiation factor 3 subunit D	EIF3-P66,EIF3-ZETA,EIF3S7
EIF3E	HGNC:3277	EIF3E	eukaryotic translation initiation factor 3 subunit E	EIF3-P48,INT6,EIF3S6
EIF3F	HGNC:3275	EIF3F	eukaryotic translation initiation factor 3 subunit F	EIF3-EPSILON,EIF3-P47,EIF3S5
EIF3I	HGNC:3272	EIF3I	eukaryotic translation initiation factor 3 subunit I	TRIP-1,EIF3-BETA,EIF3-P36,EIF3S2
EIF3L	HGNC:18138	EIF3L	eukaryotic translation initiation factor 3 subunit L	HSPC021,HSPC025,EIF3S11,EIF3S6IP,EIF3EIP
EIF4A3	HGNC:18683	EIF4A3	eukaryotic translation initiation factor 4A3	KIAA0111,EIF4AIII,FAL1,DDX48
EIF4B	HGNC:3285	EIF4B	eukaryotic translation initiation factor 4B
EIF4E	HGNC:3287	EIF4E	eukaryotic translation initiation factor 4E	EIF4E1,EIF4EL1,EIF4F
EIF4EBP1	HGNC:3288	EIF4EBP1	eukaryotic translation initiation factor 4E binding protein 1	PHAS-I,4E-BP1
EIF4EBP2	HGNC:3289	EIF4EBP2	eukaryotic translation initiation factor 4E binding protein 2
EIF4G1	HGNC:3296	EIF4G1	eukaryotic translation initiation factor 4 gamma 1	P220,PARK18,EIF4G,EIF4F
EIF4G2	HGNC:3297	EIF4G2	eukaryotic translation initiation factor 4 gamma 2	DAP5,NAT1,P97
NAT1	HGNC:3297	EIF4G2	eukaryotic translation initiation factor 4 gamma 2	DAP5,NAT1,P97
EIF4G3	HGNC:3298	EIF4G3	eukaryotic translation initiation factor 4 gamma 3	EIF4GII
EIF5	HGNC:3299	EIF5	eukaryotic translation initiation factor 5
EIF5A	HGNC:3300	EIF5A	eukaryotic translation initiation factor 5A	EIF5A1,EIF-5A,MGC99547,MGC104255
EIF5B	HGNC:30793	EIF5B	eukaryotic translation initiation factor 5B	IF2,KIAA0741,DKFZP434I036,FLJ10524
EIF6	HGNC:6159	EIF6	eukaryotic translation initiation factor 6	P27BBP,B(2)GCN,EIF3A,ITGB4BP
ELAVL1	HGNC:3312	ELAVL1	ELAV like RNA binding protein 1	HUR,HUA,MELG,HUR
ELAVL2	HGNC:3313	ELAVL2	ELAV like RNA binding protein 2	HUB,HEL-N1
ELAVL4	HGNC:3315	ELAVL4	ELAV like RNA binding protein 4	PNEM,HUD
EPHA4	HGNC:3388	EPHA4	EPH receptor A4	HEK8,TYRO1
EPHA7	HGNC:3390	EPHA7	EPH receptor A7	HEK11
EPHB1	HGNC:3392	EPHB1	EPH receptor B1	HEK6,EPHT2
EPHB2	HGNC:3393	EPHB2	EPH receptor B2	HEK5,TYRO5,DRT,ERK,EPHT3
EPN1	HGNC:21604	EPN1	epsin 1
EPS15	HGNC:3419	EPS15	epidermal growth factor receptor pathway substrate 15	AF-1P,MLLT5
EPS15L1	HGNC:24634	EPS15L1	epidermal growth factor receptor pathway substrate 15 like 1	EPS15R
EPS8	HGNC:3420	EPS8	epidermal growth factor receptor pathway substrate 8
ERBB2	HGNC:3430	ERBB2	erb-b2 receptor tyrosine kinase 2	NEU,HER-2,CD340,HER2,NGL
ERBB4	HGNC:3432	ERBB4	erb-b2 receptor tyrosine kinase 4	ALS19,HER4
ERBIN	HGNC:15842	ERBIN	erbb2 interacting protein	LAP2,ERBB2IP
ERC1	HGNC:17072	ERC1	ELKS/RAB6-interacting/CAST family member 1	ELKS,KIAA1081,CAST2,MGC12974,RAB6IP2
CAST	HGNC:31922	ERC2	ELKS/RAB6-interacting/CAST family member 2	CAST,CAST1,KIAA0378,SPBC110,SPC110,ELKSL
EVI5	HGNC:3501	EVI5	ecotropic viral integration site 5	NB4S
EXOC2	HGNC:24968	EXOC2	exocyst complex component 2	FLJ11026,SEC5P,SEC5L1
EXOC3	HGNC:30378	EXOC3	exocyst complex component 3	SEC6P,SEC6L1
EXOC4	HGNC:30389	EXOC4	exocyst complex component 4	KIAA1699,MGC27170,SEC8,SEC8P,SEC8L1
EZR	HGNC:12691	EZR	ezrin	VIL2
FARP1	HGNC:3591	FARP1	FERM, ARH/RhoGEF and pleckstrin domain protein 1	CDEP,PLEKHC2,MGC87400,PPP1R75
FBXL20	HGNC:24679	FBXL20	F-box and leucine rich repeat protein 20	MGC15482,FBL2,FBL20
FBXO2	HGNC:13581	FBXO2	F-box protein 2	FBX2,NFB42,FBS1,FBG1,OCP1
FILIP1	HGNC:21015	FILIP1	filamin A interacting protein 1	FILIP,KIAA1275
FKBP1A	HGNC:3711	FKBP1A	FKBP prolyl isomerase 1A	FKBP-12,FKBP12,PKC12,PPIASE,FKBP12C,FKBP1
FLNA	HGNC:3754	FLNA	filamin A	ABP-280,FLN1,FLN,OPD2,OPD1
FLOT1	HGNC:3757	FLOT1	flotillin 1
FLOT2	HGNC:3758	FLOT2	flotillin 2	ESA,ESA1,ECS-1,ECS1,M17S1
FLRT3	HGNC:3762	FLRT3	fibronectin leucine rich transmembrane protein 3
FMR1	HGNC:3775	FMR1	FMRP translational regulator 1	FMRP,FRAXA,MGC87458,POF1,POF
FUBP1	HGNC:4004	FUBP1	far upstream element binding protein 1	FBP,FUBP
FXR1	HGNC:4023	FXR1	FMR1 autosomal homolog 1
FXR2	HGNC:4024	FXR2	FMR1 autosomal homolog 2	FMR1L2
FYN	HGNC:4037	FYN	FYN proto-oncogene, Src family tyrosine kinase	SYN,SLK,MGC45350
SLK	HGNC:4037	FYN	FYN proto-oncogene, Src family tyrosine kinase	SYN,SLK,MGC45350
FZD1	HGNC:4038	FZD1	frizzled class receptor 1	DKFZP564G072
FZD3	HGNC:4047	FZD9	frizzled class receptor 9	FZD3,CD349
GAP43	HGNC:4140	GAP43	growth associated protein 43	B-50,PP46,GAP-43
GAPDH	HGNC:4141	GAPDH	glyceraldehyde-3-phosphate dehydrogenase	GAPD
GDI1	HGNC:4226	GDI1	GDP dissociation inhibitor 1	RABGDIA,XAP-4,OPHN2,FLJ41411,MRX48,MRX41,GDIL
GDI2	HGNC:4227	GDI2	GDP dissociation inhibitor 2	RABGDIB
GIPC1	HGNC:1226	GIPC1	GIPC PDZ domain containing family member 1	TIP-2,HS.6454,GIPC,SEMCAP,GLUT1CBP,SYNECTIN,NIP,C19ORF3,RGS19IP1
GIT1	HGNC:4272	GIT1	GIT ArfGAP 1
GIT2	HGNC:4273	GIT2	GIT ArfGAP 2	KIAA0148,PKL
GNAI2	HGNC:4385	GNAI2	G protein subunit alpha i2	GIP,GNAI2B
GPC1	HGNC:4449	GPC1	glypican 1	GLYPICAN
GPC2	HGNC:4450	GPC2	glypican 2	CEREBROGLYCAN,FLJ38962,DKFZP547M109
GPC4	HGNC:4452	GPC4	glypican 4	K-GLYPICAN
GPC6	HGNC:4454	GPC6	glypican 6
GPHN	HGNC:15465	GPHN	gephyrin	KIAA1385
GPM6A	HGNC:4460	GPM6A	glycoprotein M6A	GPM6
GLUD1	HGNC:4575	GRID1	glutamate ionotropic receptor delta type subunit 1	GLUD1,KIAA1220
GLUD2	HGNC:4576	GRID2	glutamate ionotropic receptor delta type subunit 2	GLUD2,GLUR-DELTA-2
GRIP1	HGNC:18708	GRIP1	glutamate receptor interacting protein 1
GRIPAP1	HGNC:18706	GRIPAP1	GRIP1 associated protein 1	GRASP-1,GRASP1,KIAA1167,MPMGP800B12492Q3,DKFZP434P0630
GRK2	HGNC:289	GRK2	G protein-coupled receptor kinase 2	BARK1,ADRBK1
GRM3	HGNC:4595	GRM3	glutamate metabotropic receptor 3	GPRC1C,MGLU3,MGLUR3
GRN	HGNC:4601	GRN	granulin precursor	PCDGF,PGRN,CLN11
GSK3B	HGNC:4617	GSK3B	glycogen synthase kinase 3 beta
GUCY1B1	HGNC:4687	GUCY1B1	guanylate cyclase 1 soluble subunit beta 1	GC-SB3,GC-S-BETA-1,GUC1B3,GUCY1B3
HABP4	HGNC:17062	HABP4	hyaluronan binding protein 4	IHABP4,SERBP1L
HAPLN1	HGNC:2380	HAPLN1	hyaluronan and proteoglycan link protein 1	CRTL1
HIP1	HGNC:4913	HIP1	huntingtin interacting protein 1	ILWEQ
HIP1R	HGNC:18415	HIP1R	huntingtin interacting protein 1 related	KIAA0655,HIP3,HIP12,FLJ14000,ILWEQ
HNRNPA0	HGNC:5030	HNRNPA0	heterogeneous nuclear ribonucleoprotein A0	HNRPA0
HNRNPA1	HGNC:5031	HNRNPA1	heterogeneous nuclear ribonucleoprotein A1	HNRNP-A1,ALS20,HNRPA1
HNRNPA2B1	HGNC:5033	HNRNPA2B1	heterogeneous nuclear ribonucleoprotein A2/B1	HNRPA2B1
HNRNPA3	HGNC:24941	HNRNPA3	heterogeneous nuclear ribonucleoprotein A3	HNRPA3
HNRNPAB	HGNC:5034	HNRNPAB	heterogeneous nuclear ribonucleoprotein A/B	ABBP1,FLJ40338,HNRPAB
HNRNPD	HGNC:5036	HNRNPD	heterogeneous nuclear ribonucleoprotein D	AUF1,HNRPD
HNRNPDL	HGNC:5037	HNRNPDL	heterogeneous nuclear ribonucleoprotein D like	JKTBP,LAAUF1,HNRPDL,LGMD1G
HNRNPF	HGNC:5039	HNRNPF	heterogeneous nuclear ribonucleoprotein F	HNRPF
HNRNPH1	HGNC:5041	HNRNPH1	heterogeneous nuclear ribonucleoprotein H1	HNRNPH,HNRPH1
HNRNPH2	HGNC:5042	HNRNPH2	heterogeneous nuclear ribonucleoprotein H2	HNRNPH',FTP3,HNRPH',HNRPH2
HNRNPK	HGNC:5044	HNRNPK	heterogeneous nuclear ribonucleoprotein K	CSBP,TUNP,HNRPK
HNRNPL	HGNC:5045	HNRNPL	heterogeneous nuclear ribonucleoprotein L	HNRPL
HNRNPLL	HGNC:25127	HNRNPLL	heterogeneous nuclear ribonucleoprotein L like	HNRPLL
HNRNPM	HGNC:5046	HNRNPM	heterogeneous nuclear ribonucleoprotein M	HTGR1,HNRNPM4,HNRPM4,CEAR,NAGR1,HNRPM
HNRNPU	HGNC:5048	HNRNPU	heterogeneous nuclear ribonucleoprotein U	SAF-A,FLJ37978,FLJ30202,HNRPU,HNRNPU-AS1,C1ORF199,NCRNA00201
HNRNPUL1	HGNC:17011	HNRNPUL1	heterogeneous nuclear ribonucleoprotein U like 1	E1B-AP5,E1BAP5,FLJ12944,HNRPUL1
HNRNPUL2	HGNC:25451	HNRNPUL2	heterogeneous nuclear ribonucleoprotein U like 2	DKFZP762N1910,HNRPUL2
HOMER1	HGNC:17512	HOMER1	homer scaffold protein 1	VES-1,SYN47,HOMER-1B
CPD	HGNC:17513	HOMER2	homer scaffold protein 2	CPD,CUPIDIN,VESL-2,HOMER-2B,HOMER-2,HOMER-2A,DFNA68
HOMER2	HGNC:17513	HOMER2	homer scaffold protein 2	CPD,CUPIDIN,VESL-2,HOMER-2B,HOMER-2,HOMER-2A,DFNA68
HOMER3	HGNC:17514	HOMER3	homer scaffold protein 3	HOMER-3
HSP90AA1	HGNC:5253	HSP90AA1	heat shock protein 90 alpha family class A member 1	HSP89,HSP90,FLJ31884,HSP90N,HSPC1,HSPCA
HSPA8	HGNC:5241	HSPA8	heat shock protein family A (Hsp70) member 8	HSC71,HSC70,HSP73,HSPA10
HTT	HGNC:4851	HTT	huntingtin	IT15,HD
IGF1R	HGNC:5465	IGF1R	insulin like growth factor 1 receptor	JTK13,CD221,IGFIR,MGC18216,IGFR
IL1RAP	HGNC:5995	IL1RAP	interleukin 1 receptor accessory protein	IL-1RACP,IL1R3,C3ORF13
INA	HGNC:6057	INA	internexin neuronal intermediate filament protein alpha	NF-66,NEF5
IQSEC1	HGNC:29112	IQSEC1	IQ motif and Sec7 domain ArfGEF 1	KIAA0763,GEP100,BRAG2,ARF-GEP100
IQSEC2	HGNC:29059	IQSEC2	IQ motif and Sec7 domain ArfGEF 2	KIAA0522,BRAG1,IQ-ARFGEF,MRX1,MRX78,MRX18
ITGA2	HGNC:6137	ITGA2	integrin subunit alpha 2	CD49B,CD49B
ITGA5	HGNC:6141	ITGA5	integrin subunit alpha 5	CD49E,FNRA
ITGB1	HGNC:6153	ITGB1	integrin subunit beta 1	CD29,GPIIA,FNRB,MSK12,MDF2
ITGB5	HGNC:6160	ITGB5	integrin subunit beta 5
ITPR3	HGNC:6182	ITPR3	inositol 1,4,5-trisphosphate receptor type 3	IP3R3
ITSN1	HGNC:6183	ITSN1	intersectin 1	SH3P17,MGC134948,MGC134949,SH3D1A,ITSN
JAK2	HGNC:6192	JAK2	Janus kinase 2	JTK10
KALRN	HGNC:4814	KALRN	kalirin RhoGEF kinase	DUO,HS.8004,TRAD,DUET,KALIRIN,ARHGEF24,HAPIP
KCNA1	HGNC:6218	KCNA1	potassium voltage-gated channel subfamily A member 1	KV1.1,RBK1,HUK1,MBK1,AEMK
HK1	HGNC:6222	KCNA4	potassium voltage-gated channel subfamily A member 4	KV1.4,HK1,HPCN2,KCNA4L
KCNAB2	HGNC:6229	KCNAB2	potassium voltage-gated channel subfamily A regulatory beta subunit 2	AKR6A5,KCNA2B,HKVBETA2.1,HKVBETA2.2
KCNN2	HGNC:6291	KCNN2	potassium calcium-activated channel subfamily N member 2	KCA2.2,HSK2
KIAA1109	HGNC:26953	KIAA1109	KIAA1109	FLJ21404,FSA,KIAA1371,TWEEK
KIF17	HGNC:19167	KIF17	kinesin family member 17	KIAA1405,KIF3X,KIF17B,OSM-3,KLP-2
KIF5A	HGNC:6323	KIF5A	kinesin family member 5A	D12S1889,NKHC,MY050,SPG10
KIF5C	HGNC:6325	KIF5C	kinesin family member 5C
KPNA1	HGNC:6394	KPNA1	karyopherin subunit alpha 1	SRP1,RCH2,NPI-1,IPOA5
KPNA2	HGNC:6395	KPNA2	karyopherin subunit alpha 2	SRP1ALPHA,IPOA1,QIP2,RCH1
KPTN	HGNC:6404	KPTN	kaptin, actin binding protein	2E4
L1CAM	HGNC:6470	L1CAM	L1 cell adhesion molecule	CD171,HSAS1,SPG1,HSAS,MASA,MIC5,S10
LAMA4	HGNC:6484	LAMA4	laminin subunit alpha 4	LAMA3
LAMA5	HGNC:6485	LAMA5	laminin subunit alpha 5
LAMB2	HGNC:6487	LAMB2	laminin subunit beta 2	NPHS5,LAMS
LAMC1	HGNC:6492	LAMC1	laminin subunit gamma 1	LAMB2
LAMP1	HGNC:6499	LAMP1	lysosomal associated membrane protein 1	CD107A
LASP1	HGNC:6513	LASP1	LIM and SH3 protein 1	MLN50,LASP-1
LGI1	HGNC:6572	LGI1	leucine rich glioma inactivated 1	IB1099,ETL1,EPITEMPIN,EPT
LIN7A	HGNC:17787	LIN7A	lin-7 homolog A, crumbs cell polarity complex component	MALS-1,TIP-33,LIN-7A,VELI1
LIN7C	HGNC:17789	LIN7C	lin-7 homolog C, crumbs cell polarity complex component	MALS-3,LIN-7C,LIN-7-C,VELI3,FLJ11215
LRFN1	HGNC:29290	LRFN1	leucine rich repeat and fibronectin type III domain containing 1	KIAA1484,SALM2
LRRC4B	HGNC:25042	LRRC4B	leucine rich repeat containing 4B	DKFZP761A179,HSM,LRIG4
LYN	HGNC:6735	LYN	LYN proto-oncogene, Src family tyrosine kinase	JTK8
LZTS1	HGNC:13861	LZTS1	leucine zipper tumor suppressor 1	FEZ1
MADD	HGNC:6766	MADD	MAP kinase activating death domain	DENN,KIAA0358,RAB3GEP
BAP1	HGNC:946	MAGI1	membrane associated guanylate kinase, WW and PDZ domain containing 1	BAP1,MAGI-1,TNRC19,AIP3,WWP3,BAIAP1
MAGI1	HGNC:946	MAGI1	membrane associated guanylate kinase, WW and PDZ domain containing 1	BAP1,MAGI-1,TNRC19,AIP3,WWP3,BAIAP1
MAGI3	HGNC:29647	MAGI3	membrane associated guanylate kinase, WW and PDZ domain containing 3	MAGI-3
MAL2	HGNC:13634	MAL2	mal, T cell differentiation protein 2
MAP1LC3A	HGNC:6838	MAP1LC3A	microtubule associated protein 1 light chain 3 alpha	MAP1BLC3,MAP1ALC3,LC3,LC3A,ATG8E
MAP2	HGNC:6839	MAP2	microtubule associated protein 2	MAP2A,MAP2B,MAP2C
MAP2K1	HGNC:6840	MAP2K1	mitogen-activated protein kinase kinase 1	MEK1,MAPKK1,PRKMK1
MAPK1	HGNC:6871	MAPK1	mitogen-activated protein kinase 1	ERK,ERK2,P41MAPK,MAPK2,PRKM2,PRKM1
MAPK10	HGNC:6872	MAPK10	mitogen-activated protein kinase 10	JNK3,P493F12,P54BSAPK,PRKM10
MAPK14	HGNC:6876	MAPK14	mitogen-activated protein kinase 14	PRKM14,P38,MXI2,PRKM15,CSPB1,CSBP1,CSBP2
MAPK3	HGNC:6877	MAPK3	mitogen-activated protein kinase 3	ERK1,P44MAPK,P44ERK1,PRKM3
MAPK8	HGNC:6881	MAPK8	mitogen-activated protein kinase 8	JNK,JNK1,SAPK1,PRKM8
MAPK9	HGNC:6886	MAPK9	mitogen-activated protein kinase 9	JNK2,P54A,SAPK,PRKM9
MARCKS	HGNC:6759	MARCKS	myristoylated alanine rich protein kinase C substrate	PKCSL,80K-L,MACS
MARCKSL1	HGNC:7142	MARCKSL1	MARCKS like 1	F52,MACMARCKS,MLP1,MLP
MARK2	HGNC:3332	MARK2	microtubule affinity regulating kinase 2	PAR-1,PAR1B,PAR-1B,EMK1
MDGA1	HGNC:19267	MDGA1	MAM domain containing glycosylphosphatidylinositol anchor 1	GPIM,MAMDC3
MDGA2	HGNC:19835	MDGA2	MAM domain containing glycosylphosphatidylinositol anchor 2	MAMDC1
MECP2	HGNC:6990	MECP2	methyl-CpG binding protein 2	RTT,MRX16,MRX79
MPDZ	HGNC:7208	MPDZ	multiple PDZ domain crumbs cell polarity complex component	MUPP1
MPP2	HGNC:7220	MPP2	membrane palmitoylated protein 2	DKFZP761D0712,DLG2
MRPL55	HGNC:16686	MRPL55	mitochondrial ribosomal protein L55
MTOR	HGNC:3942	MTOR	mechanistic target of rapamycin kinase	RAFT1,RAPT1,FLJ44809,FRAP,FRAP2,FRAP1
MYH10	HGNC:7568	MYH10	myosin heavy chain 10	NMMHCB
MYO5A	HGNC:7602	MYO5A	myosin VA	MYO5,GS1,MYR12,MYH12
MYO5B	HGNC:7603	MYO5B	myosin VB	KIAA1119
MYO6	HGNC:7605	MYO6	myosin VI	KIAA0389,DFNA22,DFNB37
MYO9A	HGNC:7608	MYO9A	myosin IXA	FLJ11061,FLJ13244,MGC71859
NAPA	HGNC:7641	NAPA	NSF attachment protein alpha
NAPB	HGNC:15751	NAPB	NSF attachment protein beta	SNAP-BETA,SNAPB
NAPG	HGNC:7642	NAPG	NSF attachment protein gamma
NBEA	HGNC:7648	NBEA	neurobeachin	KIAA1544,BCL8B,FLJ10197,LYST2
NCAM1	HGNC:7656	NCAM1	neural cell adhesion molecule 1	NCAM,CD56
NCAN	HGNC:2465	NCAN	neurocan	CSPG3
NCKAP1	HGNC:7666	NCKAP1	NCK associated protein 1	NAP1,HEM2,NAP125
NCSTN	HGNC:17091	NCSTN	nicastrin	KIAA0253,APH2
NECAP1	HGNC:24539	NECAP1	NECAP endocytosis associated 1	DKFZP566B183
NECTIN1	HGNC:9706	NECTIN1	nectin cell adhesion molecule 1	PRR,PRR1,PVRR1,SK-12,HIGR,CLPED1,CD111,OFC7,HVEC,ED4,PVRL1
NECTIN3	HGNC:17664	NECTIN3	nectin cell adhesion molecule 3	NECTIN-3,PPR3,PVRR3,DKFZP566B0846,CDW113,CD113,PVRL3
NEDD4	HGNC:7727	NEDD4	NEDD4 E3 ubiquitin protein ligase	KIAA0093,MGC176705,NEDD4-1,RPF1
RPF1	HGNC:7727	NEDD4	NEDD4 E3 ubiquitin protein ligase	KIAA0093,MGC176705,NEDD4-1,RPF1
NEFL	HGNC:7739	NEFL	neurofilament light	NFL,CMT1F,CMT2E,NF68,PPP1R110
NEFM	HGNC:7734	NEFM	neurofilament medium	NFM,NF-M,NEF3
NETO2	HGNC:14644	NETO2	neuropilin and tolloid like 2	FLJ10430,NEOT2
NF1	HGNC:7765	NF1	neurofibromin 1
NGDN	HGNC:20271	NGDN	neuroguidin	DKFZP564O092,LCP5,LPD-2,NGD,CANU1,C14ORF120
NGEF	HGNC:7807	NGEF	neuronal guanine nucleotide exchange factor	ARHGEF27
NGFR	HGNC:7809	NGFR	nerve growth factor receptor	TNFRSF16,CD271,P75NTR
NLGN2	HGNC:14290	NLGN2	neuroligin 2	KIAA1366
NLGN3	HGNC:14289	NLGN3	neuroligin 3	HNL3,KIAA1480,ASPGX1,AUTSX1
NLGN4X	HGNC:14287	NLGN4X	neuroligin 4 X-linked	KIAA1260,NLGN,HLNX,NLGN4
NOS1AP	HGNC:16859	NOS1AP	nitric oxide synthase 1 adaptor protein	KIAA0464,CAPON
NPTN	HGNC:17867	NPTN	neuroplastin	SDR1,GP55,GP65,NP65,NP55,SDFR1
NRCAM	HGNC:7994	NRCAM	neuronal cell adhesion molecule	KIAA0343,BRAVO
NRG1	HGNC:7997	NRG1	neuregulin 1	HRG,NDF,GGF,HGL,NRG1-IT2
NRGN	HGNC:8000	NRGN	neurogranin	RC3
NRP1	HGNC:8004	NRP1	neuropilin 1	NRP,VEGF165R,CD304
NRP2	HGNC:8005	NRP2	neuropilin 2	VEGF165R2
NSF	HGNC:8016	NSF	N-ethylmaleimide sensitive factor, vesicle fusing ATPase	SKD2,SEC18
NUFIP1	HGNC:8057	NUFIP1	nuclear FMR1 interacting protein 1	NUFIP,RSA1
NUMB	HGNC:8060	NUMB	NUMB endocytic adaptor protein	C14ORF41
NUMBL	HGNC:8061	NUMBL	NUMB like endocytic adaptor protein	NUMB-R,CTG3A,CAG3A,TNRC23,NUMBR,NUMBLIKE
OGT	HGNC:8127	OGT	O-linked N-acetylglucosamine (GlcNAc) transferase	O-GLCNAC,HRNT1,MGC22921,FLJ23071,OGT1
OLFM1	HGNC:17187	OLFM1	olfactomedin 1	NOE1,OLFA,AMY,NOELIN
OLFM2	HGNC:17189	OLFM2	olfactomedin 2	OLFC,NOE2
OPHN1	HGNC:8148	OPHN1	oligophrenin 1	OPN1,ARHGAP41,MRX60
P2RX3	HGNC:8534	P2RX3	purinergic receptor P2X 3	P2X3
PABPC1	HGNC:8554	PABPC1	poly(A) binding protein cytoplasmic 1	PABP1,PABPL1,PAB1,PABPC2
PACSIN2	HGNC:8571	PACSIN2	protein kinase C and casein kinase substrate in neurons 2	SDPII
PAFAH1B1	HGNC:8574	PAFAH1B1	platelet activating factor acetylhydrolase 1b regulatory subunit 1	LIS1,PAFAH,NUDF,MDCR,MDS
PAK1	HGNC:8590	PAK1	p21 (RAC1) activated kinase 1
PAK2	HGNC:8591	PAK2	p21 (RAC1) activated kinase 2	PAK65,PAKGAMMA
PAK3	HGNC:8592	PAK3	p21 (RAC1) activated kinase 3	HPAK3,BPAK,MRX30,MRX47
PARN	HGNC:8609	PARN	poly(A)-specific ribonuclease	DAN
PCBP1	HGNC:8647	PCBP1	poly(rC) binding protein 1	HNRPE1,HNRNP-E1,HNRPX,HNRNP-X
PCBP2	HGNC:8648	PCBP2	poly(rC) binding protein 2	HNRPE2,HNRNP-E2,HNRNPE2
PCDH8	HGNC:8660	PCDH8	protocadherin 8	PAPC,ARCADLIN
PFN1	HGNC:8881	PFN1	profilin 1
PFN2	HGNC:8882	PFN2	profilin 2
PHB	HGNC:8912	PHB	prohibitin	PHB1
PHB2	HGNC:30306	PHB2	prohibitin 2	REA,BCAP37,BAP37,P22
PICALM	HGNC:15514	PICALM	phosphatidylinositol binding clathrin assembly protein	CALM,CLTH
PICK1	HGNC:9394	PICK1	protein interacting with PRKCA 1	DJ1039K5,MGC15204,PRKCABP
PIN1	HGNC:8988	PIN1	peptidylprolyl cis/trans isomerase, NIMA-interacting 1	DOD
PIP5K1C	HGNC:8996	PIP5K1C	phosphatidylinositol-4-phosphate 5-kinase type 1 gamma	PIP5KGAMMA,KIAA0589,LCCS3
PLAT	HGNC:9051	PLAT	plasminogen activator, tissue type
PLCB1	HGNC:15917	PLCB1	phospholipase C beta 1	KIAA0581,PLC-I,PLC154
PLCB3	HGNC:9056	PLCB3	phospholipase C beta 3
PLCB4	HGNC:9059	PLCB4	phospholipase C beta 4
PLCG1	HGNC:9065	PLCG1	phospholipase C gamma 1	PLC148,PLC-II,PLCGAMMA1,NCKAP3,PLC1
PLEKHA5	HGNC:30036	PLEKHA5	pleckstrin homology domain containing A5	PEPP2,KIAA1686,FLJ10667
PLEKHG5	HGNC:29105	PLEKHG5	pleckstrin homology and RhoGEF domain containing G5	KIAA0720,SYX,GEF720,TECH
PLG	HGNC:9071	PLG	plasminogen
PLS3	HGNC:9091	PLS3	plastin 3	T-PLASTIN
PLXNC1	HGNC:9106	PLXNC1	plexin C1	VESPR,CD232
PNKD	HGNC:9153	PNKD	PNKD metallo-beta-lactamase domain containing	DYT8,PDC,DKFZP564N1362,FPD1,MR-1,BRP17,FKSG19,TAHCCP2,KIAA1184,KIPP1184,MGC31943,PKND1,MR-1S
POR	HGNC:17652	PORCN	porcupine O-acyltransferase	MG61,PORC,PPN,POR,DHOF
PPA2	HGNC:28883	PPA2	inorganic pyrophosphatase 2	FLJ20459
PPFIA1	HGNC:9245	PPFIA1	PTPRF interacting protein alpha 1	LIP.1,LIPRIN
PPFIBP2	HGNC:9250	PPFIBP2	PPFIA binding protein 2	CCLP1
PPM1H	HGNC:18583	PPM1H	protein phosphatase, Mg2+/Mn2+ dependent 1H	KIAA1157,FLJ13253,NERPP-2C,ARHCL1
PPP1CA	HGNC:9281	PPP1CA	protein phosphatase 1 catalytic subunit alpha	PP1A,PP-1A,PP1ALPHA,PPP1A
PPP1CC	HGNC:9283	PPP1CC	protein phosphatase 1 catalytic subunit gamma	PP1C,PP1GAMMA
PPP1R1B	HGNC:9287	PPP1R1B	protein phosphatase 1 regulatory inhibitor subunit 1B	DARPP-32,FLJ20940
PPP1R9A	HGNC:14946	PPP1R9A	protein phosphatase 1 regulatory subunit 9A	NEURABIN-I,KIAA1222,FLJ20068
PPP1R9B	HGNC:9298	PPP1R9B	protein phosphatase 1 regulatory subunit 9B	SPN,SPINO,PPP1R6,PPP1R9
PPP2CA	HGNC:9299	PPP2CA	protein phosphatase 2 catalytic subunit alpha	PP2CALPHA,PP2AC
PPP2R1A	HGNC:9302	PPP2R1A	protein phosphatase 2 scaffold subunit Aalpha	PR65A,PP2A-AALPHA,PP2AA
PPP2R1B	HGNC:9303	PPP2R1B	protein phosphatase 2 scaffold subunit Abeta	PR65B,PP2A-ABETA
PPP2R2A	HGNC:9304	PPP2R2A	protein phosphatase 2 regulatory subunit Balpha	PR52A,PR55A,B55A,PR55ALPHA,B55ALPHA
PPP3CA	HGNC:9314	PPP3CA	protein phosphatase 3 catalytic subunit alpha	CNA1,PPP2B,CALN,CALNA
PPP3CB	HGNC:9315	PPP3CB	protein phosphatase 3 catalytic subunit beta	CALNA2,CNA2,PP2BBETA,CALNB
PPP3CC	HGNC:9316	PPP3CC	protein phosphatase 3 catalytic subunit gamma	CALNA3,PP2BGAMMA
PPP3R1	HGNC:9317	PPP3R1	protein phosphatase 3 regulatory subunit B, alpha	CALNB1,CNB,CNB1
PRKACA	HGNC:9380	PRKACA	protein kinase cAMP-activated catalytic subunit alpha	PKACA
PRKAR1A	HGNC:9388	PRKAR1A	protein kinase cAMP-dependent type I regulatory subunit alpha	CNC1,PRKAR1,TSE1
PRKAR1B	HGNC:9390	PRKAR1B	protein kinase cAMP-dependent type I regulatory subunit beta
PRKAR2A	HGNC:9391	PRKAR2A	protein kinase cAMP-dependent type II regulatory subunit alpha	PRKAR2
PRKAR2B	HGNC:9392	PRKAR2B	protein kinase cAMP-dependent type II regulatory subunit beta	PRKAR2
PRKCA	HGNC:9393	PRKCA	protein kinase C alpha	PKCΑ,PKCA
PRKCB	HGNC:9395	PRKCB	protein kinase C beta	PKCΒ,PRKCB2,PKCB,PRKCB1
PRKCD	HGNC:9399	PRKCD	protein kinase C delta
PRKCE	HGNC:9401	PRKCE	protein kinase C epsilon
PRKCG	HGNC:9402	PRKCG	protein kinase C gamma	PKCC,MGC57564,PKCΓ,PKCG,SCA14
PRKCI	HGNC:9404	PRKCI	protein kinase C iota	PKCI,DXS1179E
PRKCZ	HGNC:9412	PRKCZ	protein kinase C zeta	PKC2
PSD2	HGNC:19092	PSD2	pleckstrin and Sec7 domain containing 2	DKFZP761B0514,EFA6C
PSEN1	HGNC:9508	PSEN1	presenilin 1	FAD,S182,PS1,AD3
PSEN2	HGNC:9509	PSEN2	presenilin 2	AD3L,STM2,PS2,AD4
PSENEN	HGNC:30100	PSENEN	presenilin enhancer, gamma-secretase subunit	PEN2
PTEN	HGNC:9588	PTEN	phosphatase and tensin homolog	MMAC1,TEP1,PTEN1,BZS,MHAM
PTK2	HGNC:9611	PTK2	protein tyrosine kinase 2	FAK,FADK,FAK1,PPP1R71
PTN	HGNC:9630	PTN	pleiotrophin	HBNF,HBGF8,NEGF1
PTPN23	HGNC:14406	PTPN23	protein tyrosine phosphatase non-receptor type 23	DKFZP564F0923,KIAA1471,HD-PTP
PTPA	HGNC:9664	PTPRA	protein tyrosine phosphatase receptor type A	LRP,HLPR,HPTPA,RPTPA,PTPRL2,PTPA
PTPRA	HGNC:9664	PTPRA	protein tyrosine phosphatase receptor type A	LRP,HLPR,HPTPA,RPTPA,PTPRL2,PTPA
PTPRD	HGNC:9668	PTPRD	protein tyrosine phosphatase receptor type D	PTPD,HPTP
PTPRF	HGNC:9670	PTPRF	protein tyrosine phosphatase receptor type F	LAR
PTPRO	HGNC:9678	PTPRO	protein tyrosine phosphatase receptor type O	PTPU2,GLEPP1,PTP-U2,PTP-OC,NPHS6
PTPRS	HGNC:9681	PTPRS	protein tyrosine phosphatase receptor type S
PTPRZ1	HGNC:9685	PTPRZ1	protein tyrosine phosphatase receptor type Z1	PTP18,RPTPB,PHOSPHACAN,PTPZ,PTPRZ
PUM1	HGNC:14957	PUM1	pumilio RNA binding family member 1	PUMH1,KIAA0099
PUM2	HGNC:14958	PUM2	pumilio RNA binding family member 2	PUMH2,KIAA0235
PURA	HGNC:9701	PURA	purine rich element binding protein A	PURALPHA,PUR1,PUR-ALPHA
QKI	HGNC:21100	QKI	QKI, KH domain containing RNA binding	QK3
RAB10	HGNC:9759	RAB10	RAB10, member RAS oncogene family
RAB11B	HGNC:9761	RAB11B	RAB11B, member RAS oncogene family	H-YPT3
RAB14	HGNC:16524	RAB14	RAB14, member RAS oncogene family	FBP,RAB-14
RAB18	HGNC:14244	RAB18	RAB18, member RAS oncogene family
RAB1A	HGNC:9758	RAB1A	RAB1A, member RAS oncogene family	YPT1,RAB1
RAB1B	HGNC:18370	RAB1B	RAB1B, member RAS oncogene family
RAB21	HGNC:18263	RAB21	RAB21, member RAS oncogene family	KIAA0118
RAB2A	HGNC:9763	RAB2A	RAB2A, member RAS oncogene family	RAB2
RAB33B	HGNC:16075	RAB33B	RAB33B, member RAS oncogene family	DKFZP434G099
RAB35	HGNC:9774	RAB35	RAB35, member RAS oncogene family	H-RAY
RAB3A	HGNC:9777	RAB3A	RAB3A, member RAS oncogene family
RAB3B	HGNC:9778	RAB3B	RAB3B, member RAS oncogene family
RAB3C	HGNC:30269	RAB3C	RAB3C, member RAS oncogene family
RAB4A	HGNC:9781	RAB4A	RAB4A, member RAS oncogene family	HRES-1/RAB4,RAB4
RAB4B	HGNC:9782	RAB4B	RAB4B, member RAS oncogene family	FLJ78649,MGC52123
RAB5A	HGNC:9783	RAB5A	RAB5A, member RAS oncogene family	RAB5
RAB5B	HGNC:9784	RAB5B	RAB5B, member RAS oncogene family
RAB5C	HGNC:9785	RAB5C	RAB5C, member RAS oncogene family	RAB5CL,RABL
RAB6A	HGNC:9786	RAB6A	RAB6A, member RAS oncogene family	RAB6
RAB6B	HGNC:14902	RAB6B	RAB6B, member RAS oncogene family
RAB7A	HGNC:9788	RAB7A	RAB7A, member RAS oncogene family	RAB7,CMT2B
RAB8A	HGNC:7007	RAB8A	RAB8A, member RAS oncogene family	RAB8,MEL
RAB8B	HGNC:30273	RAB8B	RAB8B, member RAS oncogene family
RABAC1	HGNC:9794	RABAC1	Rab acceptor 1	PRA1,PRAF1,YIP3
RABEP1	HGNC:17677	RABEP1	rabaptin, RAB GTPase binding effector protein 1	NEUROCRESCIN,RAB5EP,RABPT5,RABAPTIN-5
RABGEF1	HGNC:17676	RABGEF1	RAB guanine nucleotide exchange factor 1	RABEX-5,RABEX5
RAC1	HGNC:9801	RAC1	Rac family small GTPase 1	TC-25,P21-RAC1,RAC-1
RAC3	HGNC:9803	RAC3	Rac family small GTPase 3
RALA	HGNC:9839	RALA	RAS like proto-oncogene A	RAL
RALBP1	HGNC:9841	RALBP1	ralA binding protein 1	RLIP76,RIP1,RIP
RANBP6	HGNC:9851	RANBP6	RAN binding protein 6
RAP1A	HGNC:9855	RAP1A	RAP1A, member of RAS oncogene family	KREV-1,SMGP21
RAP1B	HGNC:9857	RAP1B	RAP1B, member of RAS oncogene family	K-REV,RAL1B,DKFZP586H0723
RAP2A	HGNC:9861	RAP2A	RAP2A, member of RAS oncogene family	K-REV,RAP2
RAPH1	HGNC:14436	RAPH1	Ras association (RalGDS/AF-6) and pleckstrin homology domains 1	KIAA1681,ALS2CR9,ALS2CR18
RBMX	HGNC:9910	RBMX	RNA binding motif protein X-linked	RNMX,HNRNP-G,HNRNPG
RDX	HGNC:9944	RDX	radixin	DFNB24
RELA	HGNC:9955	RELA	RELA proto-oncogene, NF-kB subunit	P65,NFKB3
RELB	HGNC:9956	RELB	RELB proto-oncogene, NF-kB subunit	REL-B
RHEB	HGNC:10011	RHEB	Ras homolog, mTORC1 binding	RHEB2
RHOA	HGNC:667	RHOA	ras homolog family member A	RHO12,RHOH12,ARH12,ARHA
RHOB	HGNC:668	RHOB	ras homolog family member B	RHOH6,MST081,ARH6,ARHB
RIMBP2	HGNC:30339	RIMBP2	RIMS binding protein 2	KIAA0318,RBP2,MGC15831,RIM-BP2,PPP1R133
RIMS3	HGNC:21292	RIMS3	regulating synaptic membrane exocytosis 3	RIM3,NIM3
RNF10	HGNC:10055	RNF10	ring finger protein 10	KIAA0262,RIE2
RNF216	HGNC:21698	RNF216	ring finger protein 216	TRIAD3,UBCE7IP1,ZIN
ROCK1	HGNC:10251	ROCK1	Rho associated coiled-coil containing protein kinase 1	P160ROCK
ROCK2	HGNC:10252	ROCK2	Rho associated coiled-coil containing protein kinase 2
ROGDI	HGNC:29478	ROGDI	rogdi atypical leucine zipper	FLJ22386
ROR2	HGNC:10257	ROR2	receptor tyrosine kinase like orphan receptor 2	NTRKR2,BDB,BDB1
RPL10	HGNC:10298	RPL10	ribosomal protein L10	NOV,QM,DXS648E,DXS648,FLJ23544,L10
RPL10A	HGNC:10299	RPL10A	ribosomal protein L10a	CSA-19,L10A,NEDD6
RPL11	HGNC:10301	RPL11	ribosomal protein L11	L11,UL5
RPL12	HGNC:10302	RPL12	ribosomal protein L12	L12
RPL13	HGNC:10303	RPL13	ribosomal protein L13	D16S444E,BBC1,L13
RPL13A	HGNC:10304	RPL13A	ribosomal protein L13a	L13A,TSTA1
RPL14	HGNC:10305	RPL14	ribosomal protein L14	L14,HRL14,RL14,CTG-B33
RPL15	HGNC:10306	RPL15	ribosomal protein L15	RPL10,RPLY10,RPYL10,EC45,L15
RPL17	HGNC:10307	RPL17	ribosomal protein L17	RPL23,L17
RPL18	HGNC:10310	RPL18	ribosomal protein L18	L18
RPL18A	HGNC:10311	RPL18A	ribosomal protein L18a	L18A
RPL19	HGNC:10312	RPL19	ribosomal protein L19	FLJ27452,MGC71997,DKFZP779D216,L19
RPL21	HGNC:10313	RPL21	ribosomal protein L21	L21,FLJ27458,MGC71252,MGC104274,MGC104275,DKFZP686C06101
RPL22	HGNC:10315	RPL22	ribosomal protein L22	EAP,L22
RPL23	HGNC:10316	RPL23	ribosomal protein L23	RPL17,L23
RPL23A	HGNC:10317	RPL23A	ribosomal protein L23a	L23A
RPL24	HGNC:10325	RPL24	ribosomal protein L24	L24
RPL26	HGNC:10327	RPL26	ribosomal protein L26	L26
RPL27	HGNC:10328	RPL27	ribosomal protein L27	L27
RPL27A	HGNC:10329	RPL27A	ribosomal protein L27a	L27A
RPL28	HGNC:10330	RPL28	ribosomal protein L28	FLJ43307,L28
RPL29	HGNC:10331	RPL29	ribosomal protein L29	HIP,HUMRPL29,L29,RPL29P10
RPL3	HGNC:10332	RPL3	ribosomal protein L3	L3
RPL30	HGNC:10333	RPL30	ribosomal protein L30	L30
RPL31	HGNC:10334	RPL31	ribosomal protein L31	L31
RPL32	HGNC:10336	RPL32	ribosomal protein L32	L32
RPL34	HGNC:10340	RPL34	ribosomal protein L34	L34
RPL35	HGNC:10344	RPL35	ribosomal protein L35	L35
RPL35A	HGNC:10345	RPL35A	ribosomal protein L35a	L35A,EL33,GIG33
RPL36	HGNC:13631	RPL36	ribosomal protein L36	DKFZP566B023,L36
RPL36A	HGNC:10359	RPL36A	ribosomal protein L36a	L36A,RPL44
RPL37	HGNC:10347	RPL37	ribosomal protein L37	L37
RPL37A	HGNC:10348	RPL37A	ribosomal protein L37a	L37A
RPL38	HGNC:10349	RPL38	ribosomal protein L38	L38
RPL4	HGNC:10353	RPL4	ribosomal protein L4	L4
RPL5	HGNC:10360	RPL5	ribosomal protein L5	L5,PPP1R135,UL18
RPL6	HGNC:10362	RPL6	ribosomal protein L6	TAXREB107,L6,TXREB1
RPL7	HGNC:10363	RPL7	ribosomal protein L7	HUML7-1,L7
RPL7A	HGNC:10364	RPL7A	ribosomal protein L7a	SURF3,TRUP,L7A
RPL8	HGNC:10368	RPL8	ribosomal protein L8	L8
RPLP0	HGNC:10371	RPLP0	ribosomal protein lateral stalk subunit P0	PRLP0,P0,L10E,RPP0,LP0
RPLP1	HGNC:10372	RPLP1	ribosomal protein lateral stalk subunit P1	LP1
RPLP2	HGNC:10377	RPLP2	ribosomal protein lateral stalk subunit P2	P2,RPP2,MGC71408,LP2,D11S2243E
RPS10	HGNC:10383	RPS10	ribosomal protein S10	MGC88819,S10
RPS11	HGNC:10384	RPS11	ribosomal protein S11	S11
RPS12	HGNC:10385	RPS12	ribosomal protein S12	S12
RPS13	HGNC:10386	RPS13	ribosomal protein S13	S13
RPS14	HGNC:10387	RPS14	ribosomal protein S14	EMTB,S14
RPS15	HGNC:10388	RPS15	ribosomal protein S15	RIG,MGC111130,S15
RPS15A	HGNC:10389	RPS15A	ribosomal protein S15a	S15A
RPS16	HGNC:10396	RPS16	ribosomal protein S16	S16
RPS17	HGNC:10397	RPS17	ribosomal protein S17	RPS17L1,RPS17L2,MGC72007,S17,RPS17L
RPS18	HGNC:10401	RPS18	ribosomal protein S18	KE3,KE-3,HKE3,S18,D6S218E
RPS19	HGNC:10402	RPS19	ribosomal protein S19	S19,ES19,DBA,LOH19CR1
RPS2	HGNC:10404	RPS2	ribosomal protein S2	LLREP3,S2
RPS20	HGNC:10405	RPS20	ribosomal protein S20	S20,US10
RPS21	HGNC:10409	RPS21	ribosomal protein S21	S21
RPS23	HGNC:10410	RPS23	ribosomal protein S23	S23,US12
RPS24	HGNC:10411	RPS24	ribosomal protein S24	S24,ES24
RPS25	HGNC:10413	RPS25	ribosomal protein S25	S25
RPS26	HGNC:10414	RPS26	ribosomal protein S26	S26,ES26
RPS27	HGNC:10416	RPS27	ribosomal protein S27	MPS-1,MPS1,S27
RPS27A	HGNC:10417	RPS27A	ribosomal protein S27a	UBCEP80,UBA80,S27A
RPS28	HGNC:10418	RPS28	ribosomal protein S28	S28,ES28
RPS3	HGNC:10420	RPS3	ribosomal protein S3	FLJ26283,FLJ27450,MGC87870,S3
RPS3A	HGNC:10421	RPS3A	ribosomal protein S3A	S3A,MFTL
RPS4X	HGNC:10424	RPS4X	ribosomal protein S4 X-linked	DXS306,CCG2,SCAR,SCR10,FLJ40595,RPS4,S4
RPS5	HGNC:10426	RPS5	ribosomal protein S5	S5
RPS6	HGNC:10429	RPS6	ribosomal protein S6	S6
RPS6KA1	HGNC:10430	RPS6KA1	ribosomal protein S6 kinase A1	RSK1,HU-1,P90RSK,MAPKAPK1
RPS6KA4	HGNC:10433	RPS6KA4	ribosomal protein S6 kinase A4	RSK-B,MSK2
RPS6KB1	HGNC:10436	RPS6KB1	ribosomal protein S6 kinase B1	S6K1,P70(S6K)-ALPHA,PS6K,S6K,STK14A
RPS7	HGNC:10440	RPS7	ribosomal protein S7	S7,ES7
RPS8	HGNC:10441	RPS8	ribosomal protein S8	S8
RPS9	HGNC:10442	RPS9	ribosomal protein S9	S9
RPSA	HGNC:6502	RPSA	ribosomal protein SA	LRP,37LRP,P40,SA,LAMR1
RTN3	HGNC:10469	RTN3	reticulon 3	NSPL2,NSPLII,ASYIP,HAP,RTN3-A1
RTN4	HGNC:14085	RTN4	reticulon 4	NSP-CL,KIAA0886,NOGO,ASY
RTN4R	HGNC:18601	RTN4R	reticulon 4 receptor	NOGOR
SACM1L	HGNC:17059	SACM1L	SAC1 like phosphatidylinositide phosphatase	SAC1,KIAA0851
SCAMP1	HGNC:10563	SCAMP1	secretory carrier membrane protein 1	SCAMP37
SCAMP5	HGNC:30386	SCAMP5	secretory carrier membrane protein 5	MGC24969
SCRIB	HGNC:30377	SCRIB	scribble planar cell polarity protein	KIAA0147,SCRB1,VARTUL
SCRN1	HGNC:22192	SCRN1	secernin 1	KIAA0193
SDCBP	HGNC:10662	SDCBP	syndecan binding protein	SYCL,MDA-9
SEC22B	HGNC:10700	SEC22B	SEC22 homolog B, vesicle trafficking protein	ERS-24,SEC22L1
SEMA3A	HGNC:10723	SEMA3A	semaphorin 3A	SEMA1,SEMD,COLL-1,HSEMA-I,SEMAD
SEMA3F	HGNC:10728	SEMA3F	semaphorin 3F	SEMAK,SEMA4
SEMA4B	HGNC:10730	SEMA4B	semaphorin 4B	SEMC,KIAA1745,MGC131831,SEMAC
SEMA4F	HGNC:10734	SEMA4F	ssemaphorin 4F	SEMAW,SEMAM
SEPTIN11	HGNC:25589	SEPTIN11	septin 11	FLJ10849,SEPT11
SEPTIN3	HGNC:10750	SEPTIN3	septin 3	SEP3,SEPT3
SEPTIN5	HGNC:9164	SEPTIN5	septin 5	HCDCREL-1,H5,PNUTL1,SEPT5
SEPTIN6	HGNC:15848	SEPTIN6	septin 6	KIAA0128,SEP2,SEPT2,MGC16619,MGC20339,SEPT6
SEPTIN7	HGNC:1717	SEPTIN7	septin 7	CDC3,SEPT7A,CDC10,SEPT7
SEPTIN8	HGNC:16511	SEPTIN8	septin 8	KIAA0202,SEP2,SEPT8
SFPQ	HGNC:10774	SFPQ	splicing factor proline and glutamine rich	PSF,PPP1R140
SGTA	HGNC:10819	SGTA	small glutamine rich tetratricopeptide repeat containing alpha	SGT
SH3GL1	HGNC:10830	SH3GL1	SH3 domain containing GRB2 like 1, endophilin A2	SH3P8,SH3D2B,CNSA1,EEN,MGC111371
SH3GLB2	HGNC:10834	SH3GLB2	SH3 domain containing GRB2 like, endophilin B2	KIAA1848
SIPA1L1	HGNC:20284	SIPA1L1	signal induced proliferation associated 1 like 1	KIAA0440,E6TP1,SPAR1
SIRT2	HGNC:10886	SIRT2	sirtuin 2	SIR2L
SKP1	HGNC:10899	SKP1	S-phase kinase associated protein 1	EMC19,OCP2,TCEB1L,MGC34403,OCP-II,P19A,SKP1A
SLC16A1	HGNC:10922	SLC16A1	solute carrier family 16 member 1	MCT,MCT1
VAT1	HGNC:10934	SLC18A1	solute carrier family 18 member A1	CGAT,VMAT1,VAT1
SLC29A1	HGNC:11003	SLC29A1	solute carrier family 29 member 1 (Augustine blood group)	ENT1
SLC2A3	HGNC:11007	SLC2A3	solute carrier family 2 member 3	GLUT3
SLC30A1	HGNC:11012	SLC30A1	solute carrier family 30 member 1	ZRC1,ZNT1
SLC3A2	HGNC:11026	SLC3A2	solute carrier family 3 member 2	4T2HC,4F2,NACAE,CD98,CD98HC,4F2HC,MDU1
SLC6A6	HGNC:11052	SLC6A6	solute carrier family 6 member 6	TAUT
SLC6A8	HGNC:11055	SLC6A8	solute carrier family 6 member 8	CRTR,CT1
SLC9A6	HGNC:11079	SLC9A6	solute carrier family 9 member A6	NHE6,KIAA0267
SNAP23	HGNC:11131	SNAP23	synaptosome associated protein 23	SNAP23A,SNAP23B,HST17016
SNAP25	HGNC:11132	SNAP25	synaptosome associated protein 25	SNAP-25,RIC-4,RIC4,SEC9,BA416N4.2,DJ1068F16.2,SNAP
SNAP29	HGNC:11133	SNAP29	synaptosome associated protein 29	SNAP-29,CEDNIK
SNAP47	HGNC:30669	SNAP47	synaptosome associated protein 47	SVAP1,SNAP-47,C1ORF142
SNAPIN	HGNC:17145	SNAPIN	SNAP associated protein	BLOC1S7,BORCS3,SNAPAP
SNCA	HGNC:11138	SNCA	synuclein alpha	NACP,PD1,PARK1,PARK4
SNCB	HGNC:11140	SNCB	synuclein beta
SNX1	HGNC:11172	SNX1	sorting nexin 1	SNX1A,MGC8664,HST17379,VPS5
SNX14	HGNC:14977	SNX14	sorting nexin 14	RGS-PX2
SNX16	HGNC:14980	SNX16	sorting nexin 16
SNX27	HGNC:20073	SNX27	sorting nexin 27	MY014,KIAA0488,MGC20471
SNX4	HGNC:11175	SNX4	sorting nexin 4	ATG24B
SNX6	HGNC:14970	SNX6	sorting nexin 6
SNX9	HGNC:14973	SNX9	sorting nexin 9	SH3PX1,SDP1,SH3PXD3A
SORT1	HGNC:11186	SORT1	sortilin 1	GP95,NT3
SPARC	HGNC:11219	SPARC	secreted protein acidic and cysteine rich	ONT,BM-40,ON
SPTAN1	HGNC:11273	SPTAN1	spectrin alpha, non-erythrocytic 1
SPTBN1	HGNC:11275	SPTBN1	spectrin beta, non-erythrocytic 1
SPTBN2	HGNC:11276	SPTBN2	spectrin beta, non-erythrocytic 2	SCA5
SRC	HGNC:11283	SRC	SRC proto-oncogene, non-receptor tyrosine kinase	ASV,C-SRC,SRC1
SRCIN1	HGNC:29506	SRCIN1	SRC kinase signaling inhibitor 1	SNIP,P140CAP,KIAA1684
STAT3	HGNC:11364	STAT3	signal transducer and activator of transcription 3	APRF
STAU1	HGNC:11370	STAU1	staufen double-stranded RNA binding protein 1	PPP1R150,STAU
STAU2	HGNC:11371	STAU2	staufen double-stranded RNA binding protein 2	39K2
STK38	HGNC:17847	STK38	serine/threonine kinase 38	NDR,NDR1
STK38L	HGNC:17848	STK38L	serine/threonine kinase 38 like	KIAA0965,NDR2
STON2	HGNC:30652	STON2	stonin 2	STNB2,STN2
STX12	HGNC:11430	STX12	syntaxin 12	STX13,STX14
STX16	HGNC:11431	STX16	syntaxin 16	HSYN16,SYN16
STX1A	HGNC:11433	STX1A	syntaxin 1A	HPC-1,P35-1,STX1
STX1B	HGNC:18539	STX1B	syntaxin 1B	STX1B1,STX1B2
STX2	HGNC:3403	STX2	syntaxin 2	EPM,STX2B,STX2C,STX2A,EPIM
STX3	HGNC:11438	STX3	syntaxin 3	STX3A
STX4	HGNC:11439	STX4	syntaxin 4	P35-2,STX4A
STX6	HGNC:11441	STX6	syntaxin 6
STX7	HGNC:11442	STX7	syntaxin 7
STXBP1	HGNC:11444	STXBP1	syntaxin binding protein 1	HUNC18,MUNC18-1,UNC18,RBSEC1
STXBP3	HGNC:11446	STXBP3	syntaxin binding protein 3	UNC-18C
STXBP4	HGNC:19694	STXBP4	syntaxin binding protein 4	SYNIP,MGC50337
SV2A	HGNC:20566	SV2A	synaptic vesicle glycoprotein 2A	SV2,KIAA0736
SYDE1	HGNC:25824	SYDE1	synapse defective Rho GTPase homolog 1	7H3,FLJ13511,SYD1
SYN1	HGNC:11494	SYN1	synapsin I	MRX50
SYNGAP1	HGNC:11497	SYNGAP1	synaptic Ras GTPase activating protein 1	SYNGAP,RASA5,KIAA1938
SYNGR1	HGNC:11498	SYNGR1	synaptogyrin 1
SYNGR2	HGNC:11499	SYNGR2	synaptogyrin 2
SYNGR3	HGNC:11501	SYNGR3	synaptogyrin 3
SYNJ1	HGNC:11503	SYNJ1	synaptojanin 1	INPP5G,PARK20
SYPL1	HGNC:11507	SYPL1	synaptophysin like 1	SYPL
SYT1	HGNC:11509	SYT1	synaptotagmin 1	P65,SYT,SVP65
SYT2	HGNC:11510	SYT2	synaptotagmin 2
SYT3	HGNC:11511	SYT3	synaptotagmin 3
SYT4	HGNC:11512	SYT4	synaptotagmin 4	KIAA1342,HST1192
SYT6	HGNC:18638	SYT6	synaptotagmin 6
SYT7	HGNC:11514	SYT7	synaptotagmin 7	IPCA-7,SYT-VII,MGC150517,PCANAP7
TACC3	HGNC:11524	TACC3	transforming acidic coiled-coil containing protein 3	ERIC1,ERIC-1,MASKIN,TACC4
TANC1	HGNC:29364	TANC1	tetratricopeptide repeat, ankyrin repeat and coiled-coil containing 1	KIAA1728,ROLSB
TANC2	HGNC:30212	TANC2	tetratricopeptide repeat, ankyrin repeat and coiled-coil containing 2	DKFZP564D166,FLJ10215,FLJ11824,KIAA1148,KIAA1636,ROLS,ROLSA
TAOK2	HGNC:16835	TAOK2	TAO kinase 2	TAO1,KIAA0881,PSK,PSK1,TAO2,MAP3K17
TBC1D24	HGNC:29203	TBC1D24	TBC1 domain family member 24	KIAA1171,TLDC6,DFNA65,DFNB86
TBC1D2B	HGNC:29183	TBC1D2B	TBC1 domain family member 2B	KIAA1055
TENM3	HGNC:29944	TENM3	teneurin transmembrane protein 3	TEN-M3,KIAA1455,TEN3,ODZ3
TENM4	HGNC:29945	TENM4	teneurin transmembrane protein 4	KIAA1302,TEN-M4,TEN4,ODZ4
TENT2	HGNC:26776	TENT2	terminal nucleotidyltransferase 2	FLJ38499,GLD2,TUT2,PAPD4
TERF2	HGNC:11729	TERF2	telomeric repeat binding factor 2	TRF2,TRBF2
TIAM1	HGNC:11805	TIAM1	TIAM Rac1 associated GEF 1
TMEM163	HGNC:25380	TMEM163	transmembrane protein 163	DKFZP566N034,SV31
TNC	HGNC:5318	TNC	tenascin C	TN,MGC167029,HXB,DFNA56
TNIK	HGNC:30765	TNIK	TRAF2 and NCK interacting kinase	KIAA0551
TPRG1L	HGNC:27007	TPRG1L	tumor protein p63 regulated 1 like	RP11-46F15.3,FLJ21811,FAM79A
TRIM3	HGNC:10064	TRIM3	tripartite motif containing 3	HAC1,BERP,RNF97,RNF22
TRIM9	HGNC:16288	TRIM9	tripartite motif containing 9	SPRING,RNF91
TRIO	HGNC:12303	TRIO	trio Rho guanine nucleotide exchange factor	ARHGEF23
TSC1	HGNC:12362	TSC1	TSC complex subunit 1	KIAA0243,LAM,HAMARTIN,TSC
TSC2	HGNC:12363	TSC2	TSC complex subunit 2	TUBERIN,LAM,PPP1R160,TSC4
TSPAN7	HGNC:11854	TSPAN7	tetraspanin 7	DXS1692E,TALLA-1,A15,CD231,MXS1,TM4SF2,MRX58
TTYH1	HGNC:13476	TTYH1	tweety family member 1
TUBA1A	HGNC:20766	TUBA1A	tubulin alpha 1a	TUBA3,B-ALPHA-1,FLJ25113
TUBB	HGNC:20778	TUBB	tubulin beta class I	OK/SW-CL.56,MGC16435,M40,TUBB5
TUBB2B	HGNC:30829	TUBB2B	tubulin beta 2B class IIb	MGC8685,DKFZP566F223,BA506K6.1
TUFM	HGNC:12420	TUFM	Tu translation elongation factor, mitochondrial	EFTU,EF-TUMT,EFTU
UBA52	HGNC:12458	UBA52	ubiquitin A-52 residue ribosomal protein fusion product 1	RPL40,CEP52,HUBCEP52,MGC57125,MGC126879,MGC126881,L40
UBE3A	HGNC:12496	UBE3A	ubiquitin protein ligase E3A	AS,ANCR,E6-AP,FLJ26981,EPVE6AP,HPVE6A
UNC13B	HGNC:12566	UNC13B	unc-13 homolog B	HMUNC13,UNC13H2,MUNC13-2,UNC13
USP46	HGNC:20075	USP46	ubiquitin specific peptidase 46	FLJ12552
USP8	HGNC:12631	USP8	ubiquitin specific peptidase 8	HUMORF8,KIAA0055,UBPY,SPG59
VAC14	HGNC:25507	VAC14	VAC14 component of PIKFYVE complex	FLJ10305,ARPIKFYVE,TAX1BP2
VAMP2	HGNC:12643	VAMP2	vesicle associated membrane protein 2	VAMP-2,SYB2
VAMP3	HGNC:12644	VAMP3	vesicle associated membrane protein 3	CEB
VAMP4	HGNC:12645	VAMP4	vesicle associated membrane protein 4
VAMP7	HGNC:11486	VAMP7	vesicle associated membrane protein 7	VAMP-7,TI-VAMP,SYBL1
VAPA	HGNC:12648	VAPA	VAMP associated protein A	HVAP-33,VAP-A
VCAN	HGNC:2464	VCAN	versican	PG-M,CSPG2
VCP	HGNC:12666	VCP	valosin containing protein	IBMPFD,P97,CDC48,TERA
VCPIP1	HGNC:30897	VCPIP1	valosin containing protein interacting protein 1	VCIP135,KIAA1850,FLJ23132,DUBA3
VDAC1	HGNC:12669	VDAC1	voltage dependent anion channel 1	MGC111064,PORIN
VHL	HGNC:12687	VHL	von Hippel-Lindau tumor suppressor	VHL1
VPS11	HGNC:14583	VPS11	VPS11 core subunit of CORVET and HOPS complexes	RNF108,PEP5
VPS16	HGNC:14584	VPS16	VPS16 core subunit of CORVET and HOPS complexes
VPS18	HGNC:15972	VPS18	VPS18 core subunit of CORVET and HOPS complexes	KIAA1475,PEP3
VPS29	HGNC:14340	VPS29	VPS29 retromer complex component	PEP11,DC7,DC15
VPS33B	HGNC:12712	VPS33B	VPS33B late endosome and lysosome associated	FLJ14848
VPS35	HGNC:13487	VPS35	VPS35 retromer complex component	FLJ10752,MEM3,PARK17
VPS45	HGNC:14579	VPS45	vacuolar protein sorting 45 homolog	H-VPS45,H1,VPS45B,VPS45A
VTI1A	HGNC:17792	VTI1A	vesicle transport through interaction with t-SNAREs 1A	MVTI1,VTI1-RP2
WASF1	HGNC:12732	WASF1	WASP family member 1	WAVE1,SCAR1,KIAA0269,WAVE
WASF2	HGNC:12733	WASF2	WASP family member 2	WAVE2,SCAR2
WASF3	HGNC:12734	WASF3	WASP family member 3	WAVE3,SCAR3,KIAA0900
WASL	HGNC:12735	WASL	WASP like actin nucleation promoting factor	N-WASP,NWASP,WASPB
WDR7	HGNC:13490	WDR7	WD repeat domain 7	KIAA0541,TRAG
WFS1	HGNC:12762	WFS1	wolframin ER transmembrane glycoprotein	DIDMOAD,WFS,DFNA6,DFNA14,DFNA38
WLS	HGNC:30238	WLS	Wnt ligand secretion mediator	FLJ23091,MRP,EVI,MIG-14,C1ORF139,GPR177
WNK1	HGNC:14540	WNK1	WNK lysine deficient protein kinase 1	HSAN2,PPP1R167,PRKWNK1,HSN2
WNT3A	HGNC:15983	WNT3A	Wnt family member 3A
WNT5A	HGNC:12784	WNT5A	Wnt family member 5A	HWNT5A
YBX1	HGNC:8014	YBX1	Y-box binding protein 1	YB-1,YB1,DBPB,NSEP-1,MDR-NF1,BP-8,CSDB,CSDA2,NSEP1
YBX3	HGNC:2428	YBX3	Y-box binding protein 3	DBPA,ZONAB,CSDA1,CSDA
YES1	HGNC:12841	YES1	YES proto-oncogene 1, Src family tyrosine kinase	YES,C-YES,HST441
YWHAE	HGNC:12851	YWHAE	tyrosine 3-monooxygenase/tryptophan 5-monooxygenase activation protein epsilon	FLJ45465
YWHAG	HGNC:12852	YWHAG	tyrosine 3-monooxygenase/tryptophan 5-monooxygenase activation protein gamma	PPP1R170,14-3-3GAMMA,14-3-3Γ
YWHAH	HGNC:12853	YWHAH	tyrosine 3-monooxygenase/tryptophan 5-monooxygenase activation protein eta	YWHA1
YWHAQ	HGNC:12854	YWHAQ	tyrosine 3-monooxygenase/tryptophan 5-monooxygenase activation protein theta	HS1,14-3-3
YWHAZ	HGNC:12855	YWHAZ	tyrosine 3-monooxygenase/tryptophan 5-monooxygenase activation protein zeta	KCIP-1,14-3-3-ZETA,YWHAD
ZDHHC5	HGNC:18472	ZDHHC5	zinc finger DHHC-type palmitoyltransferase 5	KIAA1748,ZNF375,DHHC5
-
A2M
AAAS
AACS
AADAT
AAGAB
AAMDC
AAMP
AAR2
AARS1
AARS2
AARSD1
AASDH
AASDHPPT
AASS
AATF
ABAT
ABCA1
ABCA2
ABCA3
ABCB10
ABCB6
ABCB7
ABCB8
ABCC1
ABCC10
ABCC2
ABCC4
ABCC5
ABCD1
ABCD3
ABCD4
ABCE1
ABCF1
ABCF2
ABCF3
ABHD10
ABHD11
ABHD12
ABHD14A
ABHD14B
ABHD16A
ABHD4
ABHD5
ABITRAM
ABLIM1
ABRACL
ABRAXAS1
ABRAXAS2
ABT1
ACAA1
ACAA2
ACACA
ACAD10
ACAD11
ACAD8
ACAD9
ACADM
ACADS
ACADSB
ACADVL
ACAP2
ACAP3
ACAT1
ACAT2
ACBD3
ACBD5
ACBD6
ACBD7
ACD
ACIN1
ACLY
ACO1
ACO2
ACOT1
ACOT13
ACOT2
ACOT7
ACOT8
ACOT9
ACOX1
ACOX2
ACOX3
ACP1
ACP2
ACP6
ACSF2
ACSF3
ACSL3
ACSL4
ACSS2
ACSS3
ACTL6A
ACTN3
ACTN4
ACTR10
ACTR1A
ACTR1B
ACTR3B
ACTR5
ACTR6
ACTR8
ACVR1
ACVR2A
ACVR2B
ACY1
ACYP1
ACYP2
ADA
ADA2
ADAL
ADAM11
ADAM15
ADAM17
ADAM9
ADAMTS4
ADAMTS7
ADAR
ADARB1
ADAT1
ADAT2
ADAT3
ADCK1
ADCK5
ADCY6
ADGRA3
ADGRG1
ADGRV1
ADH5
ADI1
ADK
ADNP
ADNP2
ADO
ADPGK
ADPRH
ADPRS
ADRM1
ADSL
ADSS1
ADSS2
AEBP2
AFAP1
AFAP1L2
AFDN
AFF1
AFF4
AFG1L
AFG3L2
AFTPH
AGA
AGAP1
AGFG1
AGFG2
AGGF1
AGK
AGL
AGMAT
AGO1
AGO2
AGO3
AGPAT1
AGPAT4
AGPAT5
AGPS
AGTPBP1
AGTRAP
AHCTF1
AHCY
AHCYL1
AHCYL2
AHDC1
AHNAK
AHSA1
AIDA
AIF1L
AIFM1
AIG1
AIMP1
AIMP2
AIP
AJUBA
AK1
AK2
AK3
AK4
AK5
AK6
AKAP10
AKAP11
AKAP13
AKAP17A
AKAP2
AKAP8
AKAP8L
AKR1B1
AKR7A2
AKT1S1
AKT2
AKT3
AKTIP
ALAD
ALAS1
ALB
ALCAM
ALDH16A1
ALDH18A1
ALDH1A1
ALDH1A2
ALDH1A3
ALDH1B1
ALDH2
ALDH3A2
ALDH4A1
ALDH5A1
ALDH6A1
ALDH7A1
ALDH9A1
ALDOA
ALG1
ALG10
ALG11
ALG13
ALG14
ALG2
ALG5
ALG6
ALG8
ALG9
ALKBH1
ALKBH2
ALKBH3
ALKBH4
ALKBH5
ALKBH6
ALKBH7
ALKBH8
ALMS1
ALOX15
ALPL
ALS2
ALX1
ALYREF
AMACR
AMBRA1
AMD1
AMDHD1
AMDHD2
AMER1
AMFR
AMMECR1
AMMECR1L
AMN1
AMOT
AMOTL1
AMOTL2
AMPD2
AMT
AMZ2
ANAPC1
ANAPC10
ANAPC11
ANAPC13
ANAPC16
ANAPC2
ANAPC4
ANAPC5
ANAPC7
ANGEL2
ANGPTL2
ANK2
ANK3
ANKFY1
ANKHD1
ANKLE2
ANKMY2
ANKRD11
ANKRD12
ANKRD13A
ANKRD13C
ANKRD16
ANKRD17
ANKRD26
ANKRD27
ANKRD28
ANKRD35
ANKRD40
ANKRD44
ANKRD45
ANKRD46
ANKRD49
ANKRD50
ANKRD52
ANKRD54
ANKRD6
ANKRD9
ANKS1A
ANKS6
ANKZF1
ANLN
ANO10
ANO8
ANOS1
ANP32A
ANP32B
ANP32E
ANPEP
ANTXR1
ANTXR2
ANXA11
ANXA13
ANXA2
ANXA3
ANXA4
ANXA6
ANXA7
AP1AR
AP1B1
AP1G2
AP1M1
AP1M2
AP1S1
AP2A1
AP2A2
AP3B1
AP3B2
AP3M1
AP3M2
AP3S1
AP3S2
AP4B1
AP4E1
AP4M1
AP4S1
AP5B1
AP5M1
AP5S1
AP5Z1
APAF1
APBA3
APC
APEH
APEX1
APH1B
API5
APIP
APLF
APLP1
APMAP
APOA1
APOC3
APOH
APOL2
APOO
APOOL
APPBP2
APRT
APTX
AQR
ARAF
ARAP1
ARAP3
ARCN1
AREL1
ARF3
ARF5
ARFGAP2
ARFGEF1
ARFGEF3
ARFIP1
ARFIP2
ARFRP1
ARG1
ARG2
ARGLU1
ARHGAP1
ARHGAP10
ARHGAP11A
ARHGAP12
ARHGAP17
ARHGAP18
ARHGAP19
ARHGAP21
ARHGAP23
ARHGAP26
ARHGAP28
ARHGAP32
ARHGAP35
ARHGAP4
ARHGAP42
ARHGAP5
ARHGEF1
ARHGEF10
ARHGEF10L
ARHGEF11
ARHGEF12
ARHGEF16
ARHGEF17
ARHGEF18
ARHGEF26
ARHGEF40
ARHGEF6
ARID1A
ARID1B
ARID2
ARID3A
ARID3B
ARID4A
ARID4B
ARIH1
ARIH2
ARL1
ARL10
ARL14EP
ARL15
ARL16
ARL2
ARL2BP
ARL3
ARL4C
ARL5B
ARL6
ARL6IP1
ARL6IP4
ARL6IP6
ARL8A
ARMC1
ARMC10
ARMC4
ARMC5
ARMC6
ARMC8
ARMC9
ARMCX1
ARMCX2
ARMCX3
ARMCX4
ARMCX5
ARMCX6
ARMH3
ARMT1
ARNT
ARNT2
ARPC1A
ARPC1B
ARPC3
ARPC4
ARPC5
ARPIN
ARPP19
ARRB1
ARRDC1
ARSA
ARSB
ARSD
ARSK
ARV1
ARVCF
ARX
AS3MT
ASAH1
ASAP2
ASAP3
ASB1
ASB3
ASB6
ASCC1
ASCC2
ASCC3
ASDURF
ASF1A
ASF1B
ASH2L
ASL
ASMTL
ASNS
ASNSD1
ASPH
ASPHD2
ASPM
ASPSCR1
ASRGL1
ASS1
ASTE1
ASTN1
ASXL1
ASXL2
ATAD2
ATAD2B
ATAD3A
ATAD3B
ATAD5
ATAT1
ATE1
ATF2
ATF6
ATF6B
ATF7
ATF7IP
ATG10
ATG101
ATG12
ATG13
ATG14
ATG16L1
ATG2A
ATG2B
ATG3
ATG4A
ATG4B
ATG4C
ATG4D
ATG5
ATG7
ATIC
ATL1
ATL2
ATL3
ATM
ATN1
ATOX1
ATP11A
ATP11B
ATP11C
ATP13A1
ATP13A2
ATP13A3
ATP1A1
ATP1A2
ATP1B1
ATP1B3
ATP2A2
ATP2C1
ATP5F1A
ATP5F1B
ATP5F1C
ATP5F1D
ATP5F1EP2
ATP5IF1
ATP5ME
ATP5MF
ATP5MG
ATP5MPL
ATP5PB
ATP5PD
ATP5PF
ATP5PO
ATP6V0A2
ATP7A
ATP7B
ATP9A
ATPAF1
ATPAF2
ATR
ATRIP
ATRN
ATRX
ATXN10
ATXN1L
ATXN2
ATXN2L
ATXN3
ATXN7L2
ATXN7L3
ATXN7L3B
AUH
AUP1
AURKAIP1
AURKB
AUTS2
AVEN
AVL9
AXIN2
AXL
AZGP1
AZI2
B2M
B3GALNT1
B3GALT5
B3GALT6
B3GAT3
B3GLCT
B3GNT2
B3GNT5
B4GALNT4
B4GALT4
B4GALT5
B4GALT7
B4GAT1
B9D2
BABAM1
BABAM2
BACH1
BACH2
BAD
BAG1
BAG2
BAG3
BAG4
BAG5
BAG6
BAIAP2L1
BAK1
BANF1
BANP
BAP18
BARD1
BARGIN
BARHL2
BASP1
BAX
BAZ1A
BAZ1B
BAZ2A
BAZ2B
BBS1
BBS2
BBS4
BBS7
BBS9
BBX
BCAM
BCAP29
BCAP31
BCAR1
BCAR3
BCAS2
BCAS3
BCAT1
BCAT2
BCCIP
BCHE
BCKDHA
BCKDHB
BCKDK
BCL10
BCL2L1
BCL2L12
BCL2L13
BCL7A
BCL7B
BCL7C
BCL9
BCL9L
BCLAF1
BCLAF3
BCO1
BCORL1
BCS1L
BDH1
BDH2
BDP1
BECN1
BEND3
BEND5
BET1
BET1L
BEX4
BHMT
BICD1
BICD2
BICRA
BID
BIN3
BIRC2
BIRC5
BIRC6
BLM
BLMH
BLOC1S3
BLOC1S4
BLOC1S5
BLVRA
BLVRB
BLZF1
BMERB1
BMI1
BMP1
BMP2K
BMPER
BMPR1A
BMPR1B
BMS1
BMT2
BNIP1
BOC
BOD1
BOD1L1
BOLA1
BOLA2B
BOP1
BORCS5
BORCS6
BORCS7
BPGM
BPHL
BPNT1
BPNT2
BPTF
BRAF
BRAP
BRAT1
BRCA1
BRCA2
BRCC3
BRD1
BRD2
BRD3
BRD4
BRD7
BRD8
BRD9
BRF1
BRI3
BRI3BP
BRIP1
BRIX1
BRK1
BRMS1
BRMS1L
BROX
BRPF1
BRPF3
BRSK1
BRSK2
BRWD1
BRWD3
BSDC1
BSG
BST2
BTAF1
BTBD10
BTBD17
BTBD2
BTD
BTF3
BTF3L4
BTN2A1
BTRC
BUB1
BUB1B
BUB3
BUD13
BUD23
BUD31
BYSL
BZW1
BZW2
C11ORF49
C11ORF54
C11ORF68
C11ORF95
C11ORF98
C12ORF29
C12ORF4
C12ORF45
C12ORF57
C16ORF70
C16ORF72
C16ORF87
C17ORF75
C17ORF80
C18ORF21
C18ORF25
C19ORF12
C19ORF25
C19ORF47
C19ORF53
C19ORF54
C1GALT1
C1GALT1C1
C1ORF112
C1ORF122
C1ORF131
C1ORF159
C1ORF174
C1ORF198
C1ORF21
C1ORF43
C1ORF52
C1QTNF4
C20ORF194
C20ORF27
C21ORF62
C2CD2
C2CD3
C2CD4C
C2CD5
C2ORF42
C2ORF49
C2ORF69
C2ORF76
C3
C3ORF33
C3ORF38
C4ORF33
C5ORF22
C5ORF24
C5ORF34
C5ORF51
C6ORF47
C7ORF25
C7ORF26
C7ORF50
C8ORF33
C8ORF37
C8ORF76
C8ORF82
C9
C9ORF40
C9ORF64
C9ORF72
C9ORF78
CA14
CA2
CA3
CA4
CA5B
CA8
CAAP1
CAB39
CAB39L
CABIN1
CABLES2
CACHD1
CACNA2D2
CACNB3
CACTIN
CACUL1
CACYBP
CAD
CADM4
CALCOCO1
CALM3
CALR
CALU
CAMK1D
CAMK2D
CAMK2G
CAMKK2
CAMKMT
CAMLG
CAMSAP1
CAMSAP2
CAMSAP3
CAND1
CAND2
CANT1
CAP1
CAPG
CAPN1
CAPN15
CAPN2
CAPN5
CAPN6
CAPN7
CAPNS1
CAPZA1
CAPZA2
CARHSP1
CARM1
CARMIL1
CARMIL2
CARS1
CARS2
CASC3
CASD1
CASKIN2
CASP14
CASP2
CASP3
CASP6
CASP7
CASP8AP2
CASP9
CASTOR2
CASZ1
CAT
CBARP
CBFA2T2
CBFA2T3
CBFB
CBL
CBLB
CBLL1
CBR1
CBR4
CBSL
CBWD1
CBWD2
CBWD3
CBWD5
CBX1
CBX2
CBX3
CBX4
CBX5
CBX8
CBY1
CBY2
CC2D1A
CC2D1B
CC2D2A
CCAR1
CCAR2
CCDC102A
CCDC103
CCDC106
CCDC117
CCDC12
CCDC124
CCDC127
CCDC130
CCDC134
CCDC137
CCDC138
CCDC14
CCDC160
CCDC174
CCDC177
CCDC18
CCDC186
CCDC191
CCDC22
CCDC25
CCDC28A
CCDC28B
CCDC43
CCDC47
CCDC50
CCDC51
CCDC58
CCDC59
CCDC6
CCDC61
CCDC70
CCDC71
CCDC71L
CCDC77
CCDC8
CCDC80
CCDC82
CCDC85C
CCDC86
CCDC88A
CCDC88B
CCDC88C
CCDC9
CCDC90B
CCDC91
CCDC92
CCDC93
CCDC97
CCHCR1
CCM2
CCNA2
CCNB1
CCNB2
CCND1
CCND3
CCNDBP1
CCNG2
CCNH
CCNI
CCNK
CCNL1
CCNL2
CCNQ
CCNT1
CCNT2
CCNY
CCNYL1
CCP110
CCPG1
CCS
CCSAP
CCSMST1
CCT2
CCT3
CCT4
CCT5
CCT6A
CCT6B
CCT7
CCT8
CCZ1B
CD151
CD200
CD276
CD2BP2
CD46
CD47
CD55
CD59
CD63
CD74
CD81
CD82
CD99
CD99L2
CDAN1
CDC123
CDC14A
CDC16
CDC20
CDC23
CDC25C
CDC26
CDC27
CDC34
CDC37
CDC37L1
CDC40
CDC42BPA
CDC42BPB
CDC42EP1
CDC42EP3
CDC42EP4
CDC45
CDC5L
CDC6
CDC7
CDC73
CDCA2
CDCA3
CDCA5
CDCA7
CDCA7L
CDCA8
CDH15
CDIPT
CDK1
CDK10
CDK11A
CDK11B
CDK12
CDK13
CDK14
CDK16
CDK17
CDK18
CDK2
CDK2AP1
CDK4
CDK5RAP1
CDK5RAP2
CDK5RAP3
CDK6
CDK7
CDK8
CDK9
CDKAL1
CDKN1B
CDKN1C
CDKN2AIP
CDKN2AIPNL
CDO1
CDON
CDPF1
CDS1
CDS2
CDSN
CDT1
CDV3
CDYL
CEBPZ
CECR2
CELF1
CELF2
CELF3
CELSR1
CELSR2
CELSR3
CEMIP2
CENATAC
CEND1
CENPB
CENPC
CENPE
CENPF
CENPH
CENPI
CENPJ
CENPK
CENPL
CENPM
CENPN
CENPO
CENPP
CENPQ
CENPS
CENPT
CENPU
CENPV
CENPVL2
CENPVL3
CEP112
CEP120
CEP128
CEP131
CEP135
CEP152
CEP162
CEP170
CEP170P1
CEP192
CEP250
CEP290
CEP350
CEP41
CEP43
CEP44
CEP55
CEP57
CEP63
CEP68
CEP70
CEP72
CEP76
CEP78
CEP83
CEP85
CEP89
CEP95
CEP97
CEPT1
CERK
CERS1
CERS2
CERS4
CERS5
CERS6
CERT1
CES2
CETN2
CETN3
CFAP20
CFAP298
CFAP36
CFAP410
CFAP57
CFAP97
CFDP1
CFL2
CGGBP1
CGN
CGNL1
CGREF1
CGRRF1
CHAC2
CHAF1A
CHAF1B
CHAMP1
CHCHD1
CHCHD2
CHCHD3
CHCHD4
CHCHD6
CHD1
CHD1L
CHD2
CHD3
CHD6
CHD7
CHD8
CHD9
CHDH
CHEK1
CHEK2
CHERP
CHFR
CHGA
CHGB
CHID1
CHKA
CHKB
CHL1
CHM
CHML
CHMP1A
CHMP1B
CHMP2A
CHMP3
CHMP4A
CHMP4B
CHMP4C
CHMP5
CHMP6
CHMP7
CHN1
CHORDC1
CHP1
CHPF
CHPF2
CHST10
CHST12
CHST14
CHST3
CHST6
CHST7
CHSY1
CHTF18
CHTF8
CHTOP
CHUK
CHURC1
[truncated: 6,684 more rows]
