# Supplementary material for: The autism-associated gene SYNGAP1 regulates human cortical neurogenesis
Source: Research Square preprint supplement (doi:10.21203/rs.3.rs-1610145/v1), 2022-05-10
Supplement: Supplementary file 5 [file cdda89313289068dfeee549b.xlsx]

## Sheet: SYNGAP1 Interactome
SYNGAP1	Interactor
SYNGAP1	SYNE2
SYNGAP1	TPR
SYNGAP1	DOCK7
SYNGAP1	ARID1A
SYNGAP1	GIT1
SYNGAP1	PTPN13
SYNGAP1	NEDD1
SYNGAP1	SART3
SYNGAP1	SEC16A
SYNGAP1	ARHGEF7
SYNGAP1	HIC2
SYNGAP1	KTN1
SYNGAP1	IGF2BP3
SYNGAP1	TRIM33
SYNGAP1	SUN2
SYNGAP1	GIT2
SYNGAP1	IGF2BP1
SYNGAP1	TANC2
SYNGAP1	KIF5B
SYNGAP1	IGF2BP2
SYNGAP1	WNK1
SYNGAP1	APC
SYNGAP1	CTNNB1
SYNGAP1	KLC4
SYNGAP1	FXR2
SYNGAP1	MAP3K4
SYNGAP1	PAK1
SYNGAP1	TFAP4
SYNGAP1	POU2F1
SYNGAP1	SMARCC1
SYNGAP1	SEC24C
SYNGAP1	NEK1
SYNGAP1	PCM1
SYNGAP1	SEC23B
SYNGAP1	ARID3B
SYNGAP1	UBR5
SYNGAP1	DDX17
SYNGAP1	ARHGEF6
SYNGAP1	CFAP410
SYNGAP1	SMARCAL1
SYNGAP1	TRIM71
SYNGAP1	KIF17
SYNGAP1	DHX9
SYNGAP1	LRCH2
SYNGAP1	CTBP2
SYNGAP1	DDX20
SYNGAP1	KEAP1
SYNGAP1	PAK3
SYNGAP1	ATXN2
SYNGAP1	SEC23A
SYNGAP1	DYNC1I2
SYNGAP1	BASP1
SYNGAP1	LRCH1
SYNGAP1	BAG6
SYNGAP1	KIF17
SYNGAP1	SIN3B
SYNGAP1	FXR1
SYNGAP1	SMARCC2
SYNGAP1	LRCH3
SYNGAP1	ZBTB46
SYNGAP1	HIRA
SYNGAP1	UPF1
SYNGAP1	DDI2
SYNGAP1	ATXN1L
SYNGAP1	BCL9
SYNGAP1	DDX3X
SYNGAP1	NCCRP1
SYNGAP1	SEC13
SYNGAP1	GPHN
SYNGAP1	ALMS1
SYNGAP1	KDM1A
SYNGAP1	NDE1
SYNGAP1	CTBP1
SYNGAP1	G3BP2
SYNGAP1	CENPF
SYNGAP1	DDX5
SYNGAP1	GATAD2A
SYNGAP1	CLU
SYNGAP1	DYNC1H1
SYNGAP1	TJP1
SYNGAP1	SDK2
SYNGAP1	TRIM28
SYNGAP1	OTUD4
SYNGAP1	CTNNA1
SYNGAP1	SMARCD1
SYNGAP1	SEC24B
SYNGAP1	STRAP
SYNGAP1	LIN28A
SYNGAP1	ZBTB39
SYNGAP1	KIF5C
SYNGAP1	FBXO11
SYNGAP1	SNX18
SYNGAP1	PRKAR1A
SYNGAP1	UNK
SYNGAP1	HCFC1
SYNGAP1	STMN1
SYNGAP1	TP53BP1
SYNGAP1	ANXA2
SYNGAP1	KIF2A
SYNGAP1	SMARCA4
SYNGAP1	MAPK1
SYNGAP1	PAK2
SYNGAP1	GNAO1
SYNGAP1	AKAP9
SYNGAP1	ROCK2
SYNGAP1	RACK1
SYNGAP1	NBEA
SYNGAP1	ARHGEF2
SYNGAP1	EZR
SYNGAP1	KIDINS220
SYNGAP1	RAC3
SYNGAP1	TSC1
SYNGAP1	CEP131
SYNGAP1	PRMT1
SYNGAP1	TLE3
SYNGAP1	MCM7
SYNGAP1	AGAP3
SYNGAP1	CDK5RAP2
SYNGAP1	G3BP1
SYNGAP1	PPP1CC
SYNGAP1	LUZP1
SYNGAP1	PPP1CA
SYNGAP1	CASK
SYNGAP1	GNB1
SYNGAP1	PPP1R9B
SYNGAP1	LIN7C
SYNGAP1	SRGAP2
SYNGAP1	LLGL1
SYNGAP1	CDC42BPB
SYNGAP1	ATXN2L
SYNGAP1	NUFIP2
SYNGAP1	CANX
SYNGAP1	BUB3
SYNGAP1	CNKSR2
SYNGAP1	CIT
