# Supplementary material for: The autism-associated gene SYNGAP1 regulates human cortical neurogenesis
Source: Research Square preprint supplement (doi:10.21203/rs.3.rs-1610145/v1), 2022-05-10
Supplement: Supplementary file 6 [file d7025246ab5cd66a1a8f7a5a.xlsx]

## Sheet: CFuPN
	p_val	avg_log2FC	pct.1	pct.2	p_val_adj
RPS4Y1	2.36998e-132	1.73745	0.829	0	5.09024e-128
CHCHD2	2.01218e-80	1.41502	0.652	0.044	4.32177e-76
CHL1	4.45745e-77	0.866111	0.535	0	9.5737e-73
PTN	2.85421e-33	1.0708	0.849	0.564	6.13027e-29
ITM2B	8.16637e-29	0.757294	0.94	0.786	1.75397e-24
SEMA3E	9.80496e-28	0.609981	0.505	0.163	2.10591e-23
EIF1B	3.31397e-27	0.621666	0.993	0.954	7.11774e-23
CPE	1.62165e-26	0.523424	0.997	0.983	3.48297e-22
COMT	1.08998e-25	0.30957	0.254	0.021	2.34107e-21
RBFOX1	2.87225e-24	0.648638	0.803	0.535	6.16901e-20
NOVA1	5.22919e-24	-0.616534	0.465	0.748	1.12313e-19
MAP3K13	3.84853e-22	0.531353	0.585	0.279	8.26586e-18
B2M	3.93311e-22	0.842372	0.659	0.376	8.44753e-18
GPR22	5.45156e-22	-0.790507	0.452	0.713	1.17089e-17
EIF1	1.81055e-21	0.365783	1	1	3.8887e-17
SORCS1	1.98005e-21	0.452525	0.495	0.194	4.25274e-17
RPS6	5.21771e-21	-0.586782	0.629	0.833	1.12066e-16
SCG5	6.68035e-21	0.603421	0.749	0.398	1.4348e-16
CPEB4	2.86997e-20	0.488961	0.806	0.499	6.16412e-16
SMCO4	2.6335e-19	0.375463	0.324	0.083	5.65623e-15
TUBB3	8.90487e-19	-0.475725	0.94	0.989	1.91259e-14
AC008164.1	1.53533e-18	0.361501	0.395	0.131	3.29758e-14
EPB41L4A-AS1	4.22301e-18	0.458539	0.967	0.877	9.07018e-14
ARMCX1	8.7126e-18	0.329338	0.368	0.114	1.87129e-13
KLF9	5.04585e-17	0.38749	0.512	0.233	1.08375e-12
JUND	2.71132e-16	0.46741	0.876	0.719	5.82337e-12
CCND2	2.88027e-16	0.461435	0.93	0.814	6.18625e-12
SHC3	5.97102e-16	0.35931	0.505	0.233	1.28246e-11
PRKAG2-AS1	1.21412e-15	0.318002	0.341	0.114	2.6077e-11
PCP4	3.44189e-15	0.385312	0.288	0.082	7.39249e-11
SBDS	4.03543e-15	0.456955	0.839	0.664	8.66731e-11
ZFPM2	7.26662e-15	0.302393	0.341	0.118	1.56072e-10
PDE1C	7.45774e-15	0.440164	0.522	0.281	1.60177e-10
RPL41	1.11831e-14	0.30044	1	1	2.4019e-10
IGFBP2	3.84767e-14	-0.476296	0.321	0.571	8.26402e-10
PLCG2	3.95195e-14	0.481885	0.993	0.989	8.488e-10
SCG2	4.01612e-14	0.489717	0.676	0.412	8.62582e-10
NEUROD6	6.5442e-14	-0.506311	0.649	0.869	1.40556e-09
ISLR2	1.14087e-13	0.40207	0.716	0.472	2.45036e-09
TUBA1A	1.1993e-13	-0.349225	1	1	2.57586e-09
R3HDM1	1.51529e-13	-0.591079	0.462	0.677	3.25454e-09
THRA	1.53792e-13	0.374567	0.88	0.742	3.30314e-09
WSB1	2.13958e-13	-0.45747	0.475	0.685	4.5954e-09
LINC00632	3.28938e-13	0.400223	0.963	0.894	7.06494e-09
EPHA5	4.44211e-13	0.363778	0.619	0.372	9.54077e-09
C8orf33	4.96213e-13	0.358015	0.696	0.472	1.06577e-08
PREPL	6.32172e-13	0.38767	0.846	0.691	1.35778e-08
PTMA	1.15906e-12	-0.317038	0.99	1	2.48942e-08
IDS	1.41078e-12	0.416817	0.823	0.67	3.03007e-08
VWC2	1.51208e-12	0.279923	0.328	0.123	3.24764e-08
PSD3	1.81975e-12	0.457354	0.809	0.63	3.90847e-08
ENC1	2.19873e-12	-0.483082	0.428	0.653	4.72243e-08
PPM1K	3.43082e-12	0.328195	0.522	0.281	7.36871e-08
HSPH1	5.05498e-12	0.425998	0.736	0.543	1.08571e-07
IPCEF1	5.24643e-12	0.279528	0.304	0.114	1.12683e-07
ZNF506	5.61852e-12	0.266803	0.361	0.15	1.20675e-07
YWHAH	8.9578e-12	0.36188	0.94	0.871	1.92396e-07
HSPA4L	9.68801e-12	0.339466	0.518	0.288	2.08079e-07
TAX1BP1	1.07154e-11	0.3609	0.903	0.825	2.30144e-07
MXD1	1.10174e-11	0.286623	0.358	0.154	2.36633e-07
PPP1R14B	1.14115e-11	-0.393035	0.542	0.738	2.45096e-07
RPL35	1.56565e-11	0.289236	0.997	0.985	3.3627e-07
GNAO1	1.83869e-11	0.364552	0.876	0.744	3.94915e-07
CNTN1	2.04074e-11	0.410023	0.833	0.677	4.38311e-07
RPL37A	2.14021e-11	0.282082	1	1	4.59675e-07
SNHG8	2.15915e-11	0.380873	0.796	0.619	4.63741e-07
DIAPH2	2.83578e-11	0.272351	0.331	0.137	6.09069e-07
TOMM7	2.85671e-11	0.287453	0.977	0.924	6.13565e-07
RFK	3.6104e-11	0.369772	0.839	0.715	7.75441e-07
TSPO	3.80584e-11	-0.370316	0.261	0.488	8.17418e-07
ATP6V0C	4.85997e-11	0.349799	0.839	0.666	1.04382e-06
H3F3B	5.85576e-11	0.273818	1	1	1.2577e-06
RPLP1	5.94311e-11	0.253278	1	1	1.27646e-06
CCDC112	7.07141e-11	-0.368469	0.635	0.795	1.5188e-06
YBX1	7.07513e-11	-0.261765	0.997	0.996	1.5196e-06
RO60	7.36144e-11	0.322507	0.866	0.696	1.58109e-06
PSIP1	7.70275e-11	0.287998	0.973	0.932	1.6544e-06
PCDH19	8.74467e-11	0.369042	0.448	0.243	1.87818e-06
SYT13	8.92386e-11	0.319699	0.548	0.319	1.91667e-06
CITED2	9.83098e-11	0.28755	0.589	0.347	2.1115e-06
DDX54	1.01421e-10	0.404186	0.324	0.144	2.17831e-06
MORF4L1	1.07569e-10	0.327519	0.977	0.96	2.31037e-06
PAFAH1B3	1.30355e-10	-0.359484	0.829	0.907	2.79977e-06
PCMTD1	1.44766e-10	0.345069	0.699	0.51	3.10928e-06
NCAM2	1.51934e-10	-0.330441	0.094	0.281	3.26324e-06
KCNK12	2.17198e-10	0.30256	0.615	0.402	4.66499e-06
NUCKS1	2.80577e-10	0.262146	0.997	0.977	6.02624e-06
SYT4	3.15136e-10	0.336831	0.749	0.529	6.76849e-06
VGF	3.21531e-10	0.311718	0.264	0.101	6.90585e-06
ACTG1	3.79241e-10	-0.27254	0.987	0.992	8.14534e-06
DIRAS2	4.09455e-10	0.306112	0.445	0.241	8.79427e-06
ETV1	4.88997e-10	-0.415864	0.502	0.664	1.05027e-05
GAPDH	5.81645e-10	-0.468567	0.669	0.806	1.24926e-05
RAB21	6.00183e-10	0.322071	0.605	0.4	1.28907e-05
SLA	8.06099e-10	-0.387206	0.395	0.615	1.73134e-05
SOX11	8.62526e-10	-0.354939	0.793	0.882	1.85253e-05
PRNP	1.11686e-09	0.295998	0.552	0.345	2.39879e-05
SCG3	1.24626e-09	0.29022	0.943	0.852	2.67672e-05
USP11	1.62221e-09	0.32408	0.739	0.565	3.48419e-05
TCEAL7	1.62938e-09	0.321518	0.595	0.412	3.49957e-05
RPLP2	1.64327e-09	0.259316	1	0.985	3.52942e-05
YAF2	1.78734e-09	0.285462	0.662	0.452	3.83884e-05
GUCY1A1	2.05253e-09	-0.331044	0.154	0.338	4.40843e-05
SRGAP2B	2.05391e-09	0.266788	0.452	0.25	4.4114e-05
AP2B1	2.23164e-09	0.296572	0.87	0.738	4.79311e-05
OAZ1	2.25284e-09	0.33313	0.993	0.951	4.83865e-05
EIF1AX	2.42603e-09	0.288699	0.973	0.92	5.21062e-05
RTN3	2.63118e-09	0.305861	0.97	0.926	5.65125e-05
CLSTN1	2.69917e-09	0.329599	0.669	0.493	5.79728e-05
GNB1	2.76392e-09	0.325991	0.816	0.71	5.93634e-05
FSTL5	2.85241e-09	0.306937	0.512	0.304	6.1264e-05
EXOC4	2.92736e-09	0.284456	0.401	0.218	6.28739e-05
RPL27A	3.16353e-09	0.287891	0.987	0.975	6.79464e-05
COMMD2	3.80245e-09	-0.439593	0.462	0.624	8.16689e-05
HIST1H2BD	3.90646e-09	0.326877	0.502	0.309	8.39029e-05
UBQLN1	4.13462e-09	0.288287	0.836	0.677	8.88035e-05
YPEL5	4.20035e-09	0.253113	0.709	0.49	9.02152e-05
NORAD	4.31884e-09	0.34064	0.843	0.74	9.276e-05
ADD2	4.76745e-09	0.293117	0.642	0.461	0.000102395
LINC00461	4.83924e-09	-0.375613	0.813	0.877	0.000103937
RPS27	4.86624e-09	0.259065	0.993	0.991	0.000104517
HLA-A	4.90529e-09	0.55031	0.495	0.332	0.000105356
NMNAT2	4.94971e-09	0.250182	0.545	0.328	0.00010631
DDIT4	6.56257e-09	-0.431217	0.237	0.421	0.000140951
EIF4A1	6.63718e-09	-0.31572	0.779	0.875	0.000142553
COX7C	6.83354e-09	0.270595	0.987	0.934	0.000146771
DKK3	7.91581e-09	0.265624	0.569	0.368	0.000170016
HIST1H1E	7.96061e-09	-0.329881	0.492	0.676	0.000170978
FOXO3	8.11828e-09	0.255595	0.542	0.342	0.000174364
SCD5	8.35219e-09	0.338915	0.876	0.757	0.000179388
COX7A2	8.46348e-09	0.315328	0.97	0.934	0.000181779
HLA-B	8.69852e-09	0.327111	0.301	0.144	0.000186827
BRD2	8.97362e-09	0.314762	0.689	0.535	0.000192735
TUBB	1.02517e-08	-0.271191	0.977	0.998	0.000220185
PSMD10	1.04224e-08	0.267141	0.619	0.421	0.000223852
CREBRF	1.07296e-08	0.257357	0.455	0.262	0.000230451
ATP5F1E	1.17151e-08	0.282286	0.97	0.911	0.000251616
GABPB1-AS1	1.30692e-08	-0.387542	0.652	0.753	0.000280701
HSPA1A	1.35594e-08	0.374593	0.398	0.209	0.000291228
CDKL5	1.41219e-08	0.260642	0.622	0.417	0.000303311
TSC22D3	1.52178e-08	0.271772	0.458	0.269	0.000326848
ATP1A1	2.19004e-08	0.272269	0.649	0.465	0.000470377
TRMT112	2.65426e-08	0.358407	0.712	0.577	0.000570082
FRRS1L	2.93808e-08	0.314717	0.789	0.624	0.00063104
SRSF7	3.38296e-08	-0.292499	0.281	0.465	0.000726592
SKP1	3.8179e-08	0.272489	0.963	0.93	0.000820009
RHOB	3.84054e-08	0.279537	0.592	0.416	0.000824872
HLA-C	4.18953e-08	0.368611	0.448	0.281	0.000899826
RPL12	5.15069e-08	-0.278446	0.933	0.981	0.00110627
SCRG1	5.96671e-08	0.371339	0.204	0.08	0.00128153
TUBB2B	6.85221e-08	-0.280369	0.987	0.994	0.00147172
MRFAP1	7.17179e-08	0.282881	0.957	0.888	0.00154036
KRT10	8.17308e-08	0.29305	0.873	0.767	0.00175541
CAP2	9.91326e-08	0.264888	0.619	0.433	0.00212917
LBH	1.06238e-07	0.324091	0.448	0.275	0.00228178
DDX46	1.12184e-07	-0.289814	0.525	0.691	0.00240948
ETFB	1.1471e-07	-0.297335	0.375	0.564	0.00246375
GABARAPL1	1.281e-07	0.271916	0.545	0.381	0.00275133
SOGA3	1.54916e-07	0.305451	0.756	0.638	0.00332729
PRPF6	1.61416e-07	0.27017	0.716	0.556	0.0034669
ATF5	3.1521e-07	0.302753	0.284	0.146	0.00677007
NDUFB4	3.45469e-07	0.270635	0.93	0.875	0.00741999
BTG3	3.54322e-07	0.266071	0.425	0.264	0.00761013
SNHG32	3.65526e-07	0.25017	0.866	0.803	0.00785077
RNF187	3.82821e-07	0.256878	0.786	0.687	0.00822223
EFNA5	4.17203e-07	0.284175	0.485	0.313	0.0089607
YWHAG	4.32124e-07	0.257173	0.943	0.896	0.00928116
MAPK1	4.39199e-07	0.257171	0.555	0.385	0.00943312
BZW1	5.29276e-07	0.261639	0.863	0.778	0.0113678
SSBP1	5.43065e-07	-0.279898	0.505	0.641	0.0116639
VIM	5.57154e-07	-0.301758	0.161	0.321	0.0119666
PJA2	5.94856e-07	0.253695	0.957	0.926	0.0127763
EIF3F	8.95307e-07	0.263442	0.813	0.698	0.0192294
DGUOK	1.086e-06	0.267117	0.829	0.717	0.0233252
DDAH2	1.17777e-06	-0.256063	0.452	0.622	0.0252962
ARL4C	1.19696e-06	0.293378	0.796	0.696	0.0257082
ARGLU1	1.22537e-06	-0.292723	0.749	0.822	0.0263185
VMA21	1.62059e-06	0.262086	0.605	0.455	0.034807
TRA2B	1.62104e-06	0.288388	0.706	0.603	0.0348167
MT-CO3	1.65408e-06	0.292173	0.973	0.968	0.0355264
DCX	1.93365e-06	0.263696	0.967	0.943	0.0415309
FBXL17	2.42878e-06	0.270506	0.355	0.214	0.0521654
HNRNPA1	2.5892e-06	-0.263221	0.659	0.77	0.0556108
PCDHGB6	2.6333e-06	0.250158	0.401	0.247	0.056558
CHD2	2.6339e-06	0.253335	0.749	0.626	0.056571
ORMDL1	3.30557e-06	0.260835	0.719	0.59	0.0709971
EPRS	3.72262e-06	-0.259351	0.642	0.761	0.0799545
MLLT3	4.54331e-06	-0.261198	0.385	0.528	0.0975813
CCNB1IP1	4.5701e-06	0.278885	0.609	0.49	0.0981567
TUBB2A	5.30056e-06	0.255115	0.997	0.989	0.113845
KHDRBS1	6.50909e-06	-0.250541	0.813	0.865	0.139802
PCDH9	6.67188e-06	0.360784	0.873	0.822	0.143299
STXBP1	6.78107e-06	0.270369	0.773	0.634	0.145644
TMSB10	7.95645e-06	-0.255767	1	0.998	0.170889
KCTD12	9.04043e-06	-0.304647	0.224	0.355	0.19417
SOBP	1.33643e-05	0.256068	0.645	0.516	0.287039
ENO1	1.88366e-05	-0.281679	0.441	0.571	0.404573
HIST1H1C	2.12773e-05	0.354754	0.729	0.63	0.456993
LMO4	2.7491e-05	0.251931	0.635	0.499	0.590451
ATP5IF1	4.23673e-05	0.259134	0.896	0.812	0.909964
HSPA8	4.34949e-05	0.269858	0.98	0.941	0.934183
PIK3R1	4.6884e-05	0.256302	0.508	0.404	1
JUN	8.33679e-05	0.33965	0.686	0.552	1
JAK1	9.79002e-05	0.325741	0.381	0.262	1
MAL2	0.000141055	0.265485	0.485	0.362	1
HIST1H4C	0.000175907	-0.318144	0.615	0.713	1
ENO2	0.000286072	-0.268984	0.482	0.609	1
ZEB2	0.000535564	0.252419	0.692	0.609	1
VRK1	0.000728952	-0.266348	0.435	0.514	1
ATP1B1	0.000741297	0.268171	0.849	0.829	1
MIF	0.00149546	-0.266058	0.916	0.945	1
AL627171.2	0.00212958	0.255779	0.793	0.727	1
BNIP3	0.00394151	-0.252602	0.505	0.596	1
TLE4	0.00860299	0.260988	0.759	0.778	1

## Sheet: CPN
	p_val	avg_log2FC	pct.1	pct.2	p_val_adj
RPS4Y1	3.07363e-69	1.83149	0.858	0	6.60153e-65
CHCHD2	6.57491e-42	1.28424	0.654	0.033	1.41216e-37
CHL1	3.90283e-34	0.693748	0.551	0.03	8.38251e-30
SCRG1	1.35199e-26	1.3497	0.591	0.107	2.9038e-22
TMSB10	4.84511e-24	0.670155	1	1	1.04063e-19
NOVA1	1.02607e-17	-0.738093	0.173	0.62	2.2038e-13
COX7C	5.6626e-16	0.546957	0.976	0.926	1.21621e-11
MEF2C	9.50223e-16	-0.896144	0.772	0.959	2.04089e-11
RPL34	4.23448e-15	0.471224	0.992	0.996	9.09482e-11
SLC17A6	3.00911e-12	0.279561	0.228	0.018	6.46296e-08
COMT	4.71834e-12	0.30544	0.244	0.026	1.0134e-07
PTN	1.16698e-11	0.798614	0.795	0.506	2.50645e-07
TNPO2	1.49274e-11	0.368509	0.472	0.151	3.20611e-07
VCAN	2.69608e-11	0.612193	0.843	0.524	5.79065e-07
RPS14	4.13255e-11	0.362955	1	1	8.87588e-07
TSPAN18	6.15617e-11	0.351698	0.37	0.096	1.32222e-06
CAMK4	6.15839e-11	0.58863	0.772	0.509	1.3227e-06
RPL32	8.37365e-11	0.351101	1	1	1.79849e-06
RPL35A	9.36464e-11	0.381756	0.992	0.985	2.01134e-06
CLSTN2	1.21928e-10	0.37475	0.291	0.059	2.61876e-06
RPL36A	1.36036e-10	0.443774	1	0.989	2.92178e-06
DPP6	1.44322e-10	0.44463	0.654	0.336	3.09975e-06
RPL27A	1.95321e-10	0.427557	1	0.985	4.19511e-06
LINC02607	2.3034e-10	0.337617	0.228	0.03	4.94725e-06
FABP7	2.94985e-10	0.789784	0.984	0.956	6.3357e-06
B2M	6.64863e-10	0.563731	0.598	0.292	1.42799e-05
MAP3K13	1.11761e-09	0.455172	0.614	0.317	2.40041e-05
ZBTB18	1.15565e-09	0.429089	0.992	0.956	2.4821e-05
RPL38	1.19665e-09	0.368478	1	0.993	2.57017e-05
PMP2	1.48623e-09	0.251529	0.197	0.022	3.19212e-05
EEF1A1	1.50943e-09	0.301991	1	1	3.24195e-05
RPS15A	2.66111e-09	0.346905	1	0.993	5.71554e-05
DDX25	2.98299e-09	0.309722	0.362	0.111	6.40688e-05
RPS19	3.44726e-09	0.392005	1	1	7.40402e-05
DTNB	4.01685e-09	0.295727	0.346	0.103	8.62739e-05
RPS21	4.48129e-09	0.350693	0.992	0.985	9.62491e-05
RPL23	4.61309e-09	0.372512	1	0.989	9.90799e-05
RPS25	5.56133e-09	0.34799	1	0.996	0.000119446
PTMS	7.15774e-09	0.393354	0.992	0.911	0.000153734
ARMCX1	7.69786e-09	0.306271	0.339	0.1	0.000165335
RPLP2	1.10986e-08	0.344095	0.992	0.982	0.000238375
RPS27	1.30668e-08	0.343098	1	0.989	0.000280648
SYT4	1.44973e-08	-0.59044	0.449	0.697	0.000311372
DCX	1.88759e-08	0.368799	1	0.978	0.000405417
C14orf132	2.0649e-08	0.357738	0.654	0.347	0.000443498
RPS10	2.09665e-08	0.436587	0.787	0.531	0.000450318
MT-CO3	2.24526e-08	0.420787	0.992	0.982	0.000482238
BEX3	2.4063e-08	0.44442	0.89	0.756	0.000516824
RASL10A	2.64954e-08	0.530403	0.717	0.446	0.000569068
RPL26	2.93317e-08	0.280485	1	1	0.000629987
RPL39	3.14382e-08	0.355724	1	0.989	0.00067523
RPL15	3.91053e-08	0.268091	1	1	0.000839904
UBA52	4.03015e-08	0.357353	0.976	0.923	0.000865595
RPL37A	4.04924e-08	0.27902	1	1	0.000869695
PDE1C	6.26084e-08	0.423805	0.457	0.203	0.0013447
HLA-A	6.69259e-08	0.438514	0.488	0.232	0.00143743
SORT1	6.75064e-08	0.411105	0.472	0.221	0.0014499
TMSB4X	7.2928e-08	0.377406	1	1	0.00156635
RPS8	7.75209e-08	0.30042	1	1	0.00166499
DNAJB5	9.59643e-08	0.276978	0.402	0.155	0.00206112
RPL35	9.63727e-08	0.323423	0.992	0.978	0.00206989
NREP	1.12052e-07	0.332264	1	0.989	0.00240666
LMO3	1.56444e-07	-0.710026	0.567	0.723	0.00336011
RPL6	1.6309e-07	0.295841	1	1	0.00350286
EXOC4	1.98937e-07	0.367639	0.772	0.509	0.00427277
CNOT2	2.04894e-07	0.520279	0.764	0.635	0.00440071
IGFBP2	2.16396e-07	-0.518979	0.654	0.815	0.00464776
CALM3	2.17414e-07	0.352027	0.945	0.797	0.00466962
SEZ6L2	2.34493e-07	0.371532	0.835	0.624	0.00503644
BCL11A	2.61396e-07	0.447881	0.945	0.886	0.00561427
RPLP1	2.63062e-07	0.271668	1	1	0.00565004
PCDH8	2.67946e-07	0.274911	0.26	0.074	0.00575495
RPL31	2.69474e-07	0.335282	0.976	0.941	0.00578776
DUSP6	3.19854e-07	0.279723	0.205	0.044	0.00686981
RPL30	3.32396e-07	0.286353	1	1	0.00713921
RPS24	3.4533e-07	0.297799	1	1	0.00741699
GLO1	3.53e-07	0.334765	0.583	0.314	0.00758173
RPL12	3.72075e-07	0.318757	0.992	0.978	0.00799143
MALAT1	3.77924e-07	-0.270222	1	1	0.00811704
CCNB1IP1	4.75392e-07	0.356499	0.764	0.531	0.0102105
RPL14	5.02623e-07	0.316804	1	0.974	0.0107953
DOK5	5.19408e-07	-0.531027	0.661	0.819	0.0111558
SF3B1	5.91698e-07	-0.404314	0.52	0.727	0.0127085
ALDH2	6.50412e-07	0.426228	0.709	0.476	0.0139696
ST6GALNAC5	6.63654e-07	0.26285	0.283	0.092	0.014254
RPL24	6.68885e-07	0.265531	1	1	0.0143663
ST6GAL2	7.34761e-07	0.338851	0.409	0.188	0.0157812
AUTS2	7.57806e-07	-0.458564	0.402	0.627	0.0162762
DDX46	7.58757e-07	-0.403271	0.551	0.768	0.0162966
RND3	8.92045e-07	-0.436755	0.37	0.601	0.0191593
SCG5	9.73032e-07	0.479647	0.512	0.277	0.0208988
IFI16	1.29523e-06	0.269236	0.299	0.107	0.027819
ADD2	1.87966e-06	0.377046	0.732	0.554	0.0403714
PABPN1	2.01802e-06	-0.359226	0.213	0.45	0.0433431
RASSF2	2.17329e-06	0.334804	0.433	0.207	0.046678
LINC00461	2.22194e-06	-0.39488	0.874	0.985	0.0477227
EID1	2.35491e-06	-0.316307	0.945	0.97	0.0505787
RBM39	2.70233e-06	-0.378348	0.803	0.923	0.0580406
HLA-B	2.80104e-06	0.309956	0.331	0.133	0.0601607
RPS23	2.8258e-06	0.317497	1	1	0.0606925
SLITRK5	3.0097e-06	-0.452766	0.173	0.395	0.0646423
COX7A2	3.97316e-06	0.287503	0.992	0.919	0.0853356
SOX4	4.47935e-06	0.270962	1	1	0.0962075
ATP1B1	4.5393e-06	-0.479303	0.449	0.631	0.0974951
BNIP3	4.55631e-06	-0.370381	0.323	0.557	0.0978605
RUNX1T1	4.74824e-06	-0.495435	0.559	0.701	0.101983
EPB41L3	4.78268e-06	0.267494	0.48	0.247	0.102722
SPTBN2	4.9615e-06	0.253688	0.354	0.151	0.106563
IGSF3	5.33804e-06	0.323864	0.709	0.476	0.114651
OPTN	5.49836e-06	0.306458	0.488	0.262	0.118094
NDUFA11	5.54278e-06	-0.369753	0.268	0.506	0.119048
SNX7	6.80023e-06	-0.468415	0.535	0.705	0.146055
DYNC1H1	7.62013e-06	0.370077	0.898	0.779	0.163665
ELAVL3	7.93446e-06	0.334728	0.969	0.875	0.170416
PSMD14	8.21438e-06	-0.359774	0.402	0.613	0.176429
JAK1	8.64711e-06	0.396978	0.559	0.343	0.185723
ZNF428	9.32576e-06	-0.434048	0.835	0.875	0.200299
UACA	9.76748e-06	0.277366	0.386	0.181	0.209786
SRP14	1.01934e-05	0.313497	0.992	0.878	0.218934
NEO1	1.04601e-05	0.410877	0.764	0.594	0.224662
SBK1	1.05452e-05	0.297447	0.803	0.62	0.22649
BEX1	1.06418e-05	0.327098	0.984	0.937	0.228564
TTC3	1.18176e-05	0.27019	1	0.989	0.253818
NEGR1	1.22894e-05	-0.399868	0.024	0.181	0.263952
TTTY14	1.30407e-05	0.326724	0.48	0.258	0.280087
ELOB	1.37139e-05	0.300118	0.953	0.889	0.294548
CAMK2N1	1.40806e-05	0.311421	1	0.993	0.302423
PSMB7	1.42863e-05	-0.328308	0.354	0.576	0.306841
MT-CO1	1.66407e-05	0.298498	1	0.989	0.357409
SHC3	1.73996e-05	0.253929	0.433	0.221	0.373708
AKT3	2.19923e-05	0.291543	0.819	0.609	0.472351
ZNF608	2.5194e-05	0.285225	0.606	0.38	0.541117
FAU	2.91785e-05	0.250014	1	1	0.626695
PUS7L	2.93732e-05	0.254158	0.402	0.207	0.630879
DYNLT1	3.29448e-05	0.283503	0.811	0.646	0.707588
IDI1	3.74105e-05	0.278854	0.827	0.653	0.803502
SSBP1	3.79396e-05	-0.313353	0.472	0.642	0.814867
RPL36	3.98002e-05	0.257248	1	0.989	0.854829
PAK5	4.28353e-05	0.40704	0.803	0.683	0.920017
TCEAL7	4.52073e-05	0.341045	0.606	0.432	0.970963
GPC2	4.64686e-05	0.253929	0.425	0.232	0.998053
C9orf16	5.22483e-05	0.26651	0.913	0.708	1
KIF3C	5.48404e-05	0.280834	0.622	0.406	1
GSTM3	6.02115e-05	0.255215	0.48	0.284	1
COX6B1	6.4901e-05	0.294377	0.898	0.782	1
SC5D	6.96448e-05	0.304968	0.528	0.336	1
MAPRE1	7.37952e-05	-0.284402	0.315	0.513	1
CCNI	8.36592e-05	0.271072	1	0.989	1
VIM	9.08146e-05	-0.294177	0.346	0.557	1
UQCRB	9.39475e-05	0.259396	0.945	0.827	1
SLC3A2	9.41573e-05	-0.352223	0.748	0.856	1
ARHGAP21	9.46474e-05	0.290786	0.811	0.598	1
SYT13	0.000105639	0.26801	0.528	0.325	1
LRRN3	0.000109156	-0.329909	0.181	0.358	1
MT-ATP6	0.000113289	0.284473	1	0.97	1
ATOX1	0.000124209	0.28376	0.693	0.498	1
MARCKS	0.000130164	-0.262016	0.976	0.982	1
MED13L	0.000136716	-0.346405	0.52	0.679	1
AURKAIP1	0.000139947	-0.272185	0.354	0.554	1
KCNMB4	0.000143658	0.28766	0.693	0.506	1
MT-ND1	0.000144932	0.256528	1	0.982	1
RNASEK	0.000155203	0.256963	0.795	0.613	1
RPS17	0.000157091	0.271391	1	0.985	1
NECAB1	0.000160984	-0.306143	0.094	0.255	1
VAMP2	0.000163069	0.264265	0.906	0.841	1
SRGAP1	0.000169494	-0.30146	0.756	0.882	1
RSPO3	0.000175416	-0.269106	0.024	0.151	1
UBE2E3	0.000179403	-0.308477	0.638	0.749	1
FOXP1	0.000187055	-0.344657	0.37	0.531	1
RNF182	0.000190637	0.261862	0.606	0.406	1
CADM1	0.00020066	-0.318708	0.346	0.55	1
HMGCS1	0.000206517	0.344616	0.63	0.443	1
GPATCH2L	0.000235207	0.259315	0.551	0.365	1
RPRM	0.000241382	-0.254459	0.039	0.17	1
PDRG1	0.000242533	-0.268634	0.299	0.487	1
ATP6V0E1	0.000269893	-0.266551	0.22	0.399	1
C8orf33	0.000278716	0.25019	0.614	0.432	1
ARID4A	0.000310068	-0.289971	0.583	0.683	1
PLXNA2	0.000315107	0.343954	0.465	0.303	1
PTPRZ1	0.000323413	0.254975	0.969	0.963	1
LARS	0.000328056	-0.31188	0.787	0.863	1
POU3F2	0.0003414	-0.354631	0.157	0.317	1
TUBB4A	0.00034345	0.263768	0.622	0.458	1
PLK2	0.000376401	-0.260544	0.244	0.428	1
GPM6B	0.000377998	-0.281575	0.236	0.406	1
SEMA3C	0.00037915	0.357692	0.52	0.354	1
ATP6V1G1	0.000387714	-0.255641	0.764	0.852	1
KRT10	0.000392513	-0.291658	0.677	0.79	1
AKIRIN2	0.000394991	-0.271343	0.354	0.528	1
GAP43	0.000406209	0.302427	0.961	0.878	1
AASDHPPT	0.00042261	-0.309541	0.772	0.845	1
LUC7L3	0.000461026	-0.309615	0.756	0.893	1
FGF12	0.000470822	-0.333161	0.354	0.517	1
CCDC112	0.000518908	-0.282403	0.724	0.834	1
SAP30	0.000552061	-0.262411	0.26	0.435	1
SSBP2	0.000574604	-0.370546	0.756	0.793	1
NRXN1	0.000602547	-0.310114	0.764	0.819	1
TOMM7	0.000610411	0.268368	0.945	0.856	1
GPR22	0.000769945	-0.399348	0.252	0.41	1
ISLR2	0.000856481	0.28256	0.551	0.38	1
GOPC	0.000974975	-0.286308	0.74	0.771	1
PCDHGB6	0.0010158	0.334783	0.378	0.236	1
FDFT1	0.00109011	0.264833	0.614	0.458	1
SRSF11	0.001104	-0.29289	0.646	0.742	1
CACNB4	0.00112354	0.334189	0.52	0.373	1
EFNB2	0.00118138	-0.29922	0.378	0.524	1
ARFGAP3	0.00118324	-0.25231	0.276	0.435	1
KAT6B	0.00145246	-0.273	0.37	0.517	1
SCG3	0.00149186	0.250938	0.906	0.841	1
AFDN	0.00151773	-0.285047	0.362	0.509	1
NASP	0.00159388	-0.271168	0.567	0.69	1
FJX1	0.00213772	-0.347108	0.559	0.646	1
KIF5B	0.00241833	-0.272455	0.622	0.694	1
HNRNPH1	0.00254115	-0.272821	0.575	0.697	1
U2SURP	0.00275078	-0.263121	0.622	0.72	1
FUS	0.00281742	-0.26423	0.591	0.731	1
NEFL	0.00298385	-0.352978	0.094	0.21	1
CHD3	0.00333727	0.257173	0.661	0.561	1
NCL	0.00347415	-0.262252	0.921	0.93	1
TXNIP	0.00348172	0.266015	0.913	0.875	1
ARGLU1	0.00374496	-0.284674	0.787	0.808	1
PSMD7	0.00384968	-0.267838	0.677	0.753	1
LDB2	0.00411803	-0.290291	0.268	0.399	1
ENC1	0.00461973	-0.381735	0.709	0.775	1
GABPB1-AS1	0.00465918	-0.264727	0.661	0.734	1
HIST1H1E	0.00480768	-0.308131	0.724	0.779	1
RPRML	0.00490514	0.257792	0.417	0.288	1
ROBO2	0.00536565	0.289862	0.465	0.343	1
TAX1BP1	0.00573561	-0.259173	0.654	0.734	1
ACAT2	0.00578004	0.304968	0.417	0.295	1
PANTR1	0.00579752	-0.270083	0.228	0.358	1
AKAP7	0.00638659	-0.256282	0.512	0.624	1
SPINT2	0.00774286	0.25596	0.528	0.41	1
NTM	0.0145495	-0.252986	0.528	0.583	1
DDIT4	0.0173918	-0.260885	0.252	0.38	1
SERPINI1	0.0217067	0.434108	0.795	0.712	1
SSTR2	0.0530213	-0.273653	0.606	0.653	1
FST	0.55932	-0.258837	0.087	0.103	1

## Sheet: late-EN2
	p_val	avg_log2FC	pct.1	pct.2	p_val_adj
RPS4Y1	2.4016e-90	1.65641	0.808	0	5.15816e-86
CHCHD2	7.65902e-45	1.3089	0.596	0.06	1.645e-40
MT-ND2	8.33486e-19	0.856148	0.98	0.787	1.79016e-14
RPL41	8.56916e-17	0.357928	1	1	1.84048e-12
TRMT112	1.26159e-15	0.595132	0.94	0.8	2.70964e-11
MT-ND1	4.26358e-15	0.717493	0.947	0.733	9.15732e-11
NOVA1	5.79423e-15	-0.62697	0.285	0.62	1.24448e-10
TUBB3	3.24121e-14	-0.70373	0.755	0.948	6.96146e-10
PLCG2	9.65622e-13	0.601883	0.993	0.985	2.07396e-08
UBA52	3.30485e-12	0.376278	0.993	0.998	7.09815e-08
H3F3A	4.21741e-12	-0.466356	1	1	9.05815e-08
GPX4	4.56369e-12	0.543324	0.907	0.755	9.80189e-08
ATP5IF1	5.93581e-12	0.52229	0.954	0.89	1.27489e-07
MAP1B	2.00171e-11	-0.489851	0.993	0.995	4.29928e-07
EIF1B	2.83018e-11	0.494261	0.987	0.895	6.07865e-07
DDIT4	8.93499e-11	-0.593475	0.623	0.805	1.91906e-06
IGFBP2	1.03996e-10	-0.739422	0.258	0.537	2.23362e-06
FTL	3.15505e-10	0.678263	1	0.998	6.77642e-06
RPL38	3.72131e-10	0.322618	1	0.998	7.99263e-06
DDX24	3.92911e-10	0.444244	0.894	0.755	8.43895e-06
IDI1	4.17734e-10	0.539101	0.98	0.94	8.97208e-06
RPS10	7.45967e-10	0.434729	0.861	0.695	1.60219e-05
FTH1	9.1114e-10	-0.354926	1	1	1.95695e-05
WSB1	1.10702e-09	-0.468218	0.629	0.833	2.37765e-05
TUBB2B	1.37463e-09	-0.535247	0.841	0.96	2.95244e-05
RPLP2	1.58117e-09	0.293642	1	1	3.39603e-05
NDUFS4	1.73314e-09	-0.456753	0.477	0.703	3.72243e-05
STMN1	1.73654e-09	-0.487114	0.907	0.968	3.72975e-05
RPL31	2.18766e-09	0.350011	0.993	0.993	4.69866e-05
DDX54	2.89428e-09	0.476816	0.437	0.205	6.21633e-05
RPL35	2.92835e-09	0.295509	1	0.998	6.28951e-05
RPL14	4.38106e-09	0.315012	1	0.993	9.40963e-05
MT-ND4	7.92696e-09	0.572457	0.914	0.818	0.000170255
RPL13A	1.05984e-08	0.273892	1	1	0.000227632
GUCY1A1	1.12482e-08	-0.561211	0.238	0.478	0.000241589
TUBA4A	1.18155e-08	0.315065	0.444	0.202	0.000253774
C12orf57	1.38431e-08	0.400969	0.854	0.69	0.000297321
A1BG	1.67593e-08	0.374545	0.497	0.262	0.000359957
GPR22	2.17317e-08	-0.61247	0.351	0.555	0.000466754
RPL27A	2.35434e-08	0.3236	1	0.995	0.000505666
LSM3	3.46731e-08	0.474313	0.927	0.815	0.000744708
TMEM14B	4.09803e-08	-0.381932	0.43	0.665	0.000880176
RPS26	4.40523e-08	0.290627	0.993	0.97	0.000946156
ZNF667-AS1	4.69612e-08	0.346757	0.623	0.368	0.00100863
MT-CO3	4.71142e-08	0.592674	0.854	0.708	0.00101192
RPS6	4.79154e-08	-0.404018	0.861	0.932	0.00102913
HSPA8	4.89651e-08	0.369024	0.98	0.953	0.00105167
UQCRQ	5.64116e-08	0.382208	0.828	0.682	0.00121161
EIF1	5.81269e-08	0.273586	1	1	0.00124845
ZNF138	6.41489e-08	-0.337549	0.099	0.325	0.00137779
CCDC112	8.46802e-08	-0.408489	0.57	0.76	0.00181876
BCL11B	1.0809e-07	-0.471556	0.828	0.89	0.00232155
MAP3K13	1.17344e-07	0.322651	0.444	0.225	0.00252032
MXD1	1.23187e-07	0.288966	0.371	0.162	0.00264582
RPS11	1.31999e-07	0.260814	1	1	0.00283507
RPS21	1.39618e-07	0.256335	1	1	0.00299872
UQCR10	1.44604e-07	0.373622	0.934	0.89	0.0031058
MLEC	1.5969e-07	0.348118	0.636	0.402	0.00342982
MDH1	1.69309e-07	0.419975	0.887	0.828	0.00363643
TOMM6	1.7004e-07	0.378616	0.881	0.79	0.00365212
CA9	1.72724e-07	-0.373684	0.358	0.62	0.00370976
SLA	2.13904e-07	-0.372156	0.265	0.51	0.00459422
ARF4	2.56619e-07	0.382294	0.868	0.78	0.00551166
VIM	2.90946e-07	-0.536553	0.172	0.392	0.00624894
RPL34	3.05034e-07	0.28069	1	1	0.00655153
BZW1	3.15047e-07	0.329702	0.808	0.593	0.00676658
TSPYL2	3.2345e-07	0.361691	0.55	0.34	0.00694707
OST4	3.25916e-07	0.445088	0.702	0.542	0.00700003
PPM1K	3.58141e-07	0.362758	0.57	0.37	0.00769214
MICOS10	4.9852e-07	-0.332307	0.192	0.415	0.0107072
SEC61B	5.09691e-07	0.308823	0.934	0.84	0.0109471
CADM2	5.43162e-07	-0.36369	0.411	0.632	0.011666
DEDD2	5.71769e-07	0.319843	0.397	0.205	0.0122804
GPI	5.76367e-07	-0.523627	0.503	0.69	0.0123792
PPP1R14B	5.91047e-07	-0.428902	0.424	0.632	0.0126945
GTF3A	6.92801e-07	-0.320523	0.384	0.613	0.01488
MT-CYB	6.95207e-07	0.400118	0.834	0.667	0.0149317
FAM8A1	8.42378e-07	0.294519	0.589	0.365	0.0180926
FNBP1L	8.90111e-07	-0.394991	0.523	0.715	0.0191178
TUBA1A	9.57939e-07	-0.455005	0.993	1	0.0205746
BSCL2	9.66902e-07	0.353965	0.583	0.38	0.0207671
PAFAH1B3	9.83402e-07	-0.344376	0.848	0.9	0.0211215
BCL11A	1.27583e-06	-0.365671	0.51	0.728	0.0274022
MAPRE1	1.34555e-06	-0.338604	0.318	0.52	0.0288998
RAB4A	1.48985e-06	-0.332942	0.291	0.507	0.0319991
HIST1H1E	1.53463e-06	-0.359194	0.212	0.422	0.0329608
VSNL1	1.57995e-06	-0.447151	0.563	0.7	0.0339342
COX7C	1.58774e-06	0.261502	1	0.965	0.0341014
SRGAP1	1.72977e-06	-0.342772	0.338	0.56	0.0371519
BASP1	1.86004e-06	-0.349945	1	0.998	0.0399499
CKB	2.01834e-06	-0.482438	0.576	0.748	0.0433498
R3HDM1	2.068e-06	-0.330755	0.205	0.415	0.0444165
SOX11	2.14913e-06	-0.451066	0.457	0.67	0.046159
IFI27	2.2614e-06	0.257353	0.397	0.202	0.0485703
BAG1	2.74543e-06	-0.288036	0.238	0.452	0.0589664
MYT1L	3.23085e-06	-0.330291	0.384	0.62	0.0693923
LINC00461	3.76813e-06	-0.37763	0.523	0.7	0.0809318
NGRN	3.89941e-06	0.273152	0.914	0.828	0.0837515
ELOB	3.96999e-06	0.285126	1	0.97	0.0852675
MT-ATP6	4.86045e-06	0.513221	0.828	0.7	0.104393
HIST1H2BD	5.40478e-06	0.349495	0.662	0.442	0.116084
CCDC107	5.74095e-06	-0.338393	0.536	0.713	0.123304
NRXN1	6.9075e-06	-0.358904	0.748	0.85	0.148359
OCIAD2	7.21977e-06	-0.360981	0.238	0.428	0.155066
GNAS	7.39011e-06	0.261813	0.987	0.978	0.158725
EVL	7.43479e-06	-0.293314	0.291	0.49	0.159684
SAP30	7.57788e-06	-0.265087	0.152	0.342	0.162758
ZNF292	7.623e-06	-0.336016	0.576	0.74	0.163727
SUCO	8.27045e-06	0.349038	0.854	0.733	0.177633
PCYOX1	8.50308e-06	0.304448	0.503	0.322	0.182629
APEX1	8.82788e-06	-0.300472	0.272	0.478	0.189605
ATP6AP1	9.36833e-06	0.301829	0.603	0.43	0.201213
ACTG1	9.67741e-06	-0.327097	0.96	0.993	0.207852
DGUOK	1.03208e-05	0.284951	0.874	0.73	0.22167
PNISR	1.13081e-05	-0.309229	0.781	0.892	0.242875
HMGCR	1.19357e-05	0.332761	0.735	0.557	0.256355
PKM	1.27334e-05	-0.327529	0.563	0.725	0.273487
ATOX1	1.2996e-05	0.286291	0.728	0.545	0.279128
POLR2A	1.32841e-05	0.312885	0.695	0.515	0.285317
PSMD12	1.35144e-05	0.284145	0.623	0.44	0.290263
MT-CO2	1.38036e-05	0.560185	0.848	0.74	0.296473
HIST1H4C	1.3868e-05	-0.391326	0.662	0.8	0.297857
NUFIP2	1.44131e-05	0.374601	0.675	0.512	0.309564
GCSH	1.53115e-05	-0.27017	0.371	0.585	0.32886
TSPO	1.53727e-05	-0.36419	0.397	0.565	0.330175
CALM3	1.57981e-05	0.2615	0.921	0.848	0.339311
KMT5B	1.72416e-05	-0.269148	0.291	0.5	0.370315
SSB	1.75826e-05	-0.296619	0.576	0.733	0.377639
SVBP	1.88064e-05	-0.319441	0.45	0.65	0.403925
BRD2	1.98654e-05	0.31151	0.762	0.63	0.426668
ELAVL2	1.99282e-05	-0.313275	0.298	0.48	0.428018
SCD	2.28094e-05	0.393756	0.748	0.63	0.4899
SERINC1	2.30704e-05	0.2815	0.861	0.785	0.495505
MT-CO1	2.37797e-05	0.265856	0.927	0.828	0.510741
GNG3	2.56554e-05	0.264791	0.49	0.305	0.551027
PHF14	2.62099e-05	-0.296225	0.477	0.698	0.562935
SPAG7	2.65369e-05	-0.290999	0.258	0.445	0.569959
ZNF462	2.81057e-05	-0.271601	0.152	0.328	0.603655
PFKFB3	2.84184e-05	-0.281206	0.152	0.33	0.61037
INSIG1	2.85913e-05	0.283161	0.517	0.32	0.614084
ATP5MD	2.96585e-05	0.258956	0.927	0.828	0.637006
GOLGB1	3.09397e-05	0.414169	0.563	0.4	0.664522
HNRNPH3	3.38272e-05	-0.256031	0.768	0.892	0.726541
SECISBP2	3.50241e-05	-0.263762	0.225	0.42	0.752248
DPYSL3	3.53942e-05	-0.306711	0.49	0.672	0.760196
PEBP1	4.05039e-05	-0.255228	0.974	0.988	0.869943
ACTB	4.15588e-05	-0.347391	0.907	0.973	0.892599
SSBP4	4.37197e-05	-0.269241	0.232	0.408	0.939012
GOLGA2	4.44137e-05	0.326964	0.629	0.468	0.953917
ATP1B3	5.22202e-05	-0.274716	0.338	0.525	1
GABPB1-AS1	5.23634e-05	-0.29968	0.596	0.752	1
MMADHC	5.28378e-05	0.313709	0.623	0.475	1
PSMC4	5.44829e-05	0.292241	0.728	0.593	1
ENC1	5.54615e-05	-0.319382	0.219	0.398	1
SBDS	5.58651e-05	0.28701	0.788	0.642	1
VEGFA	5.61022e-05	-0.356156	0.417	0.578	1
GRIA2	5.67415e-05	-0.355654	0.775	0.853	1
ATP6V0B	5.77643e-05	0.31292	0.821	0.767	1
CCT2	6.21797e-05	-0.25986	0.623	0.76	1
ARID1B	6.39004e-05	-0.283382	0.245	0.415	1
AUTS2	6.53741e-05	-0.278875	0.212	0.382	1
MSMO1	7.58547e-05	0.341803	0.868	0.772	1
ISLR2	7.61976e-05	0.252804	0.371	0.212	1
NASP	7.72211e-05	-0.290201	0.305	0.482	1
PURB	7.81868e-05	0.280394	0.483	0.322	1
COX5B	7.93896e-05	0.269904	0.96	0.873	1
MEX3A	8.05071e-05	-0.276277	0.258	0.43	1
MXI1	8.11954e-05	-0.275887	0.252	0.422	1
SMIM14	8.12009e-05	0.329503	0.57	0.412	1
SQLE	8.30459e-05	0.329331	0.894	0.85	1
PSMA5	8.40108e-05	0.269721	0.788	0.62	1
IMPDH2	8.9835e-05	0.293411	0.623	0.465	1
HMGCS1	9.87577e-05	0.364246	0.868	0.785	1
MARCKS	0.000100202	-0.332567	0.894	0.938	1
NDUFA6	0.000107248	0.278732	0.722	0.58	1
AL627171.2	0.000110327	0.515634	0.735	0.63	1
RTF1	0.000111795	-0.282112	0.675	0.755	1
MAP1LC3B	0.000113616	0.339941	0.768	0.657	1
MAP4K4	0.00011634	-0.318992	0.464	0.593	1
SELENOM	0.00011735	0.29624	0.815	0.693	1
NDUFS2	0.000117682	-0.262652	0.417	0.59	1
DAD1	0.000124808	0.343422	0.834	0.765	1
PJA2	0.000127458	0.262016	0.967	0.882	1
RPL36A	0.000132877	0.266334	0.993	0.99	1
MT-ND5	0.000135983	0.254208	0.768	0.615	1
GOLGA4	0.000149252	0.289974	0.715	0.588	1
INPP5F	0.000149312	0.255912	0.589	0.415	1
EGLN1	0.00015735	-0.25712	0.258	0.42	1
UBE2I	0.000163928	-0.271459	0.444	0.598	1
HLA-B	0.00016417	0.34491	0.503	0.355	1
XRCC5	0.000166561	-0.258713	0.848	0.91	1
CCDC88A	0.000172123	-0.259215	0.391	0.555	1
TPM1	0.00017671	-0.286949	0.556	0.672	1
NBEA	0.000185604	-0.281295	0.397	0.55	1
TXN	0.0001863	-0.282336	0.722	0.83	1
SLC25A3	0.000202834	0.263242	0.874	0.8	1
NANS	0.000227306	0.251646	0.563	0.415	1
SEZ6L2	0.000253147	0.250477	0.821	0.715	1
RNASEK	0.00025515	0.304365	0.742	0.623	1
CDH2	0.000255845	-0.281932	0.391	0.537	1
CCND2	0.000259092	0.280696	0.841	0.777	1
RTN1	0.000263816	-0.283479	0.834	0.905	1
KRT10	0.000277085	0.317341	0.894	0.78	1
MT-ND4L	0.000288451	0.270379	0.483	0.325	1
ARPP21	0.000289485	-0.336016	0.795	0.892	1
IDS	0.000336333	0.320243	0.841	0.762	1
CELF4	0.00038519	-0.285065	0.576	0.705	1
SEPTIN11	0.000389112	-0.267949	0.417	0.568	1
HMGN3	0.000395319	-0.276055	0.437	0.58	1
NEUROD6	0.000401233	-0.301854	0.51	0.718	1
ENO1	0.000401422	-0.297228	0.735	0.82	1
NSG2	0.000405571	-0.272356	0.735	0.807	1
EIF5	0.000413573	-0.290215	0.623	0.738	1
YIPF5	0.000413771	0.250531	0.477	0.332	1
ATP5ME	0.000512758	0.286556	0.861	0.782	1
MAPT	0.00051546	-0.307835	0.762	0.807	1
CCDC85B	0.000541036	-0.26345	0.384	0.517	1
PURA	0.000571269	0.272185	0.53	0.398	1
C19orf53	0.000572338	0.265212	0.841	0.72	1
GOLT1B	0.000595299	0.279722	0.616	0.488	1
YWHAH	0.000597804	0.317621	0.828	0.745	1
SSTR2	0.000599991	0.349069	0.45	0.32	1
MZT1	0.000650817	0.291726	0.609	0.507	1
NORAD	0.000655807	0.318475	0.868	0.762	1
DAAM1	0.000657782	-0.279869	0.55	0.677	1
LINC01578	0.000677445	-0.282411	0.483	0.613	1
KDM3A	0.000725004	-0.264007	0.311	0.458	1
BNIP3	0.000736848	-0.363191	0.828	0.877	1
ATP6V0C	0.000746474	0.263034	0.828	0.767	1
NDUFS5	0.000760027	0.253875	0.954	0.895	1
MT-ND3	0.000770666	0.260069	0.636	0.498	1
CHML	0.000776936	-0.25638	0.291	0.432	1
RPP21	0.000793249	0.25388	0.709	0.593	1
ETFB	0.000906986	-0.26677	0.563	0.672	1
ELAVL4	0.00113161	-0.252102	0.457	0.573	1
UBE3A	0.00114828	-0.252001	0.325	0.462	1
VRK1	0.00126694	-0.261305	0.291	0.42	1
CDKN2D	0.00134963	0.258078	0.821	0.713	1
HIST1H1D	0.00141106	-0.283745	0.325	0.458	1
UCHL1	0.00156786	-0.291855	0.881	0.912	1
MPC2	0.0023762	0.274482	0.669	0.603	1
BTG1	0.00243103	-0.25699	0.55	0.665	1
B2M	0.00243564	0.521488	0.669	0.603	1
HERPUD1	0.0029474	0.264791	0.609	0.498	1
HLA-C	0.0030851	0.301684	0.523	0.41	1
CUTA	0.00348054	0.300033	0.57	0.478	1
SCRG1	0.00402101	0.269936	0.159	0.08	1
UFM1	0.00557619	0.261336	0.742	0.655	1
SNCA	0.00945247	0.280969	0.675	0.557	1
FABP5	0.0135306	-0.266494	0.417	0.51	1
SCG2	0.0225418	0.445951	0.371	0.282	1
ZFAS1	0.0296826	-0.270127	0.947	0.975	1
HLA-A	0.111289	0.320987	0.444	0.41	1
LDHA	0.178634	-0.319271	0.258	0.292	1

## Sheet: late-EN1
	p_val	avg_log2FC	pct.1	pct.2	p_val_adj
RPS4Y1	8.10216e-178	1.88452	0.873	0	1.74018e-173
CHCHD2	6.3785e-111	1.28769	0.679	0.035	1.36997e-106
SCRG1	2.44069e-70	1.15885	0.719	0.193	5.24211e-66
CHL1	3.95081e-47	0.410952	0.286	0.002	8.48555e-43
PMP2	9.00205e-26	0.320987	0.22	0.023	1.93346e-21
IGFBP2	3.48626e-21	-0.740497	0.724	0.869	7.48779e-17
RPS10	1.19834e-19	0.438997	0.846	0.675	2.5738e-15
IFI16	2.04576e-19	0.34206	0.358	0.123	4.39387e-15
AGPS	2.61029e-17	0.317771	0.332	0.117	5.60639e-13
CLVS2	4.65225e-17	0.303646	0.369	0.143	9.99211e-13
CDKN1A	6.31744e-17	0.446781	0.337	0.125	1.35686e-12
PLCG2	7.73999e-17	0.494216	0.992	0.994	1.6624e-12
EDIL3	1.32063e-16	0.346317	0.419	0.19	2.83645e-12
PUS7L	6.64298e-16	0.280186	0.334	0.125	1.42678e-11
TXNIP	9.19406e-16	0.483306	0.857	0.7	1.9747e-11
RPS19	4.95625e-15	0.311565	1	1	1.0645e-10
MAP3K13	8.46044e-15	0.34104	0.485	0.255	1.81713e-10
H3F3A	1.05617e-14	-0.263683	1	1	2.26844e-10
CAMK4	4.48725e-14	0.370819	0.663	0.446	9.63771e-10
SYT13	5.05293e-14	0.268253	0.318	0.127	1.08527e-09
KCNK12	5.20168e-14	0.274886	0.366	0.16	1.11722e-09
HS6ST1	5.20334e-14	0.293164	0.446	0.224	1.11757e-09
ST6GAL2	7.66965e-14	0.272528	0.355	0.154	1.64729e-09
NEO1	7.00169e-13	0.310455	0.557	0.342	1.50382e-08
VIM	1.09944e-12	-0.524091	0.361	0.556	2.36137e-08
B2M	2.21581e-12	0.363583	0.841	0.636	4.75912e-08
DDX54	2.7501e-12	0.278199	0.257	0.098	5.90665e-08
CSRP2	6.35201e-12	-0.542594	0.907	0.913	1.36429e-07
TOMM7	1.30868e-11	0.308236	0.976	0.916	2.81078e-07
PAG1	1.46156e-11	0.254564	0.324	0.148	3.13913e-07
NOVA1	3.16264e-11	-0.351767	0.329	0.512	6.79271e-07
DPP6	5.9922e-11	0.252792	0.406	0.215	1.287e-06
POU3F2	1.02e-10	-0.359135	0.244	0.434	2.19076e-06
BBC3	1.2423e-10	0.290922	0.485	0.289	2.66822e-06
CNOT2	4.46591e-10	0.388259	0.745	0.601	9.59189e-06
ISLR2	1.1614e-09	0.251227	0.387	0.214	2.49446e-05
CALM3	4.11845e-09	0.28119	0.841	0.67	8.84562e-05
EPB41L4A-AS1	4.17088e-09	0.27324	0.897	0.792	8.95821e-05
TCEAL7	4.49656e-09	0.271028	0.525	0.342	9.65772e-05
CCNB1IP1	5.41606e-09	0.278018	0.751	0.575	0.000116326
HIST1H2BD	8.56891e-09	0.325416	0.411	0.245	0.000184043
JAK1	8.9489e-09	0.267351	0.536	0.351	0.000192205
MORF4L1	3.91203e-08	0.274172	0.899	0.83	0.000840226
PANTR1	6.03777e-08	-0.33593	0.284	0.44	0.00129679
ZNF428	6.45146e-08	-0.270844	0.745	0.848	0.00138565
GPM6A	8.3301e-08	-0.253195	0.981	0.983	0.00178914
GAPDH	9.47753e-08	-0.336407	0.944	0.968	0.00203558
MT-ND2	1.1815e-07	0.288322	0.992	0.946	0.00253764
CEP85L	1.61189e-07	0.253858	0.456	0.3	0.00346202
LINC00632	1.70342e-07	0.258456	0.759	0.608	0.00365861
HLA-A	2.48834e-07	0.269663	0.671	0.486	0.00534445
HERPUD1	2.65315e-07	0.267649	0.525	0.372	0.00569844
HLA-B	5.70242e-07	0.250192	0.52	0.357	0.0122477
CKB	8.22084e-07	-0.277385	0.894	0.937	0.0176567
DDIT4	1.59735e-06	-0.458459	0.44	0.544	0.0343079
LINC00461	3.02511e-06	-0.258996	0.82	0.895	0.0649733
ARGLU1	3.16447e-06	-0.26793	0.629	0.745	0.0679665
RPS27L	3.82133e-06	0.262608	0.777	0.691	0.0820745
PTN	1.75246e-05	0.299597	0.615	0.509	0.376394
MIF	1.7903e-05	-0.252147	0.989	0.986	0.384521
HSPA1A	6.1486e-05	0.262719	0.228	0.133	1
GAP43	0.000136344	0.250162	0.828	0.804	1
AL627171.2	0.000167526	0.379125	0.865	0.816	1
JUN	0.00147562	0.267533	0.676	0.623	1

## Sheet: IPC-EN
	p_val	avg_log2FC	pct.1	pct.2	p_val_adj
RPS4Y1	7.13147e-108	1.77923	0.797	0	1.5317e-103
CHCHD2	4.41567e-44	1.13392	0.568	0.043	9.48398e-40
CDKN1A	7.18437e-17	0.916793	0.635	0.196	1.54306e-12
NR2F1	2.65269e-12	0.73474	0.973	0.728	5.69745e-08
PLCG2	1.48378e-10	0.560702	1	1	3.18686e-06
HMGB1	5.05983e-10	-0.536321	0.959	0.996	1.08675e-05
RRM2B	9.85143e-10	0.423173	0.405	0.128	2.11589e-05
CCND2	1.48441e-09	0.638821	0.946	0.874	3.18821e-05
H3F3A	1.88825e-09	-0.353247	1	1	4.05559e-05
NRP2	2.47545e-09	0.49445	0.419	0.146	5.31676e-05
STIM2	3.061e-09	0.300913	0.338	0.095	6.57441e-05
LGALS3	5.58153e-09	0.326817	0.338	0.095	0.00011988
PMP2	9.71242e-09	0.788237	0.568	0.257	0.000208603
PSAP	1.44371e-08	0.410255	0.743	0.392	0.00031008
DDB2	3.51241e-08	0.409995	0.365	0.126	0.000754395
LRRTM2	4.06994e-08	0.504988	0.595	0.291	0.000874142
GAPDH	4.85727e-08	-0.528499	0.986	0.982	0.00104324
LTA4H	8.23763e-08	0.315808	0.432	0.165	0.00176928
RPS27L	1.00266e-07	0.467182	0.946	0.815	0.00215351
CRABP1	1.00929e-07	0.651375	0.541	0.245	0.00216776
RPS19	1.20428e-07	0.367244	1	1	0.00258656
ARMCX1	1.20703e-07	0.25389	0.216	0.05	0.00259246
EOMES	1.72683e-07	0.475052	0.811	0.534	0.00370888
ADGRB3	1.9283e-07	0.315394	0.351	0.122	0.00414159
GATAD1	2.51343e-07	0.32875	0.446	0.185	0.00539834
ANKRD17	3.29374e-07	0.28358	0.459	0.187	0.0070743
COPA	3.9113e-07	0.441825	0.595	0.329	0.00840069
MIF	4.59807e-07	-0.53407	0.919	0.982	0.00987573
MAP3K13	4.81076e-07	0.352708	0.378	0.149	0.0103326
MIR99AHG	4.82937e-07	0.469576	0.838	0.592	0.0103725
RMRP	5.15172e-07	0.418307	0.608	0.318	0.0110649
RPS10	5.84599e-07	0.480051	0.838	0.644	0.012556
ASPH	6.47256e-07	0.40016	0.459	0.201	0.0139018
MRPL52	6.59841e-07	0.326184	0.73	0.41	0.0141721
PTX3	8.37444e-07	0.265632	0.162	0.032	0.0179866
OGFR	9.95041e-07	0.283406	0.27	0.086	0.0213715
SOX2	1.01805e-06	0.649282	0.689	0.437	0.0218658
SCN3A	1.06224e-06	0.495929	0.365	0.153	0.0228148
ZNF506	1.09264e-06	0.295956	0.284	0.094	0.0234676
DST	1.37306e-06	0.468017	0.676	0.41	0.0294905
SAMD8	1.74767e-06	0.263848	0.257	0.079	0.0375364
ANKLE2	1.94157e-06	0.287292	0.311	0.11	0.0417011
SSX2IP	2.07118e-06	0.322489	0.473	0.221	0.0444847
GRAMD1A	2.74705e-06	0.307143	0.405	0.176	0.0590012
BTG2	2.84863e-06	0.503354	0.703	0.424	0.0611829
DDX42	2.88277e-06	0.328677	0.446	0.209	0.0619161
STOX2	2.91669e-06	0.353491	0.338	0.135	0.0626446
FOXP4	3.74266e-06	0.260395	0.284	0.099	0.0803848
STMN1	4.03296e-06	-0.44595	0.946	0.982	0.0866199
SCN1A	4.134e-06	0.307623	0.23	0.07	0.0887901
NUTM2B-AS1	4.32472e-06	0.27809	0.378	0.156	0.0928863
SYNRG	4.3626e-06	0.32875	0.419	0.192	0.0937
CNOT4	7.07756e-06	0.303767	0.446	0.207	0.152012
MT-CYB	7.15621e-06	-0.458277	1	0.993	0.153701
MARCKSL1	7.81542e-06	-0.376718	0.959	0.982	0.16786
ADGRV1	9.47669e-06	0.303402	0.419	0.196	0.20354
TAF1D	1.0943e-05	0.396194	0.541	0.308	0.235033
SLC17A7	1.24949e-05	0.299786	0.324	0.133	0.268366
EMX2	1.31177e-05	0.314183	0.622	0.347	0.281743
CCDC144NL-AS1	1.31795e-05	0.290232	0.216	0.068	0.283069
KMT2C	1.34386e-05	0.394676	0.635	0.374	0.288633
RPS5	1.63909e-05	-0.304441	1	1	0.352044
TM2D1	1.83869e-05	0.268783	0.419	0.196	0.394914
ADGRG1	1.95433e-05	0.372491	0.662	0.45	0.41975
SUPT5H	2.02105e-05	0.278513	0.378	0.169	0.43408
RCOR2	2.15578e-05	0.337531	0.527	0.302	0.463019
TUBB3	2.39585e-05	-0.436755	0.959	0.989	0.514581
ZNF451	2.56647e-05	0.254576	0.351	0.151	0.551227
LDLRAD3	2.60381e-05	0.250402	0.27	0.103	0.559247
PHF6	2.7711e-05	0.329441	0.635	0.397	0.595177
ROCK1	2.80618e-05	0.260909	0.541	0.282	0.60271
EPC1	3.04514e-05	0.385926	0.581	0.354	0.654034
ZKSCAN1	3.17214e-05	0.307561	0.73	0.428	0.681313
NUPR1	3.17267e-05	0.328606	0.311	0.126	0.681427
CCNY	3.25962e-05	0.283943	0.392	0.185	0.700102
ANKRD10	3.27325e-05	0.262833	0.324	0.138	0.703029
DUSP1	3.32984e-05	0.351876	0.541	0.318	0.715183
MSI2	3.36344e-05	0.30283	0.568	0.318	0.7224
BTG1	4.37073e-05	0.420601	0.986	0.969	0.938746
MRPS10	4.80912e-05	0.274772	0.432	0.218	1
SENP6	4.83845e-05	0.276396	0.405	0.196	1
SMG1	5.48762e-05	0.255227	0.351	0.16	1
ZMAT3	5.59664e-05	0.336774	0.527	0.293	1
NFIX	5.65716e-05	0.353021	0.784	0.603	1
FTH1	5.7451e-05	-0.292847	1	1	1
MT-ATP8	5.85419e-05	0.316039	0.392	0.192	1
MT-ND6	7.16843e-05	0.374085	0.649	0.417	1
MKNK2	7.83429e-05	0.280839	0.297	0.129	1
TCAF1	8.07093e-05	0.357692	0.622	0.397	1
ATP6V1H	8.32515e-05	0.275005	0.324	0.149	1
ARID1A	8.44613e-05	0.270485	0.581	0.336	1
ROBO2	8.74381e-05	0.331174	0.608	0.374	1
HSPB1	8.85769e-05	0.319152	0.554	0.317	1
SLC1A3	9.14487e-05	0.430376	0.473	0.281	1
TJP1	9.32419e-05	0.254136	0.419	0.214	1
PPP1R14B	0.000107294	-0.400317	0.838	0.903	1
CHD8	0.000111664	0.256219	0.405	0.207	1
ZNF445	0.000113	0.257733	0.297	0.129	1
DSTN	0.000117154	0.306635	0.824	0.57	1
PTMA	0.000118714	-0.290594	1	1	1
UBXN7	0.00012077	0.28358	0.365	0.178	1
PRKCSH	0.000121874	0.252211	0.378	0.185	1
PKN2	0.000124765	0.316113	0.392	0.209	1
LTN1	0.000126094	0.287165	0.338	0.16	1
AP2B1	0.000131143	0.257927	0.554	0.324	1
MRPS30	0.00013268	0.283997	0.432	0.23	1
MTF2	0.000133347	0.309095	0.459	0.263	1
TRIO	0.000143917	0.305666	0.392	0.205	1
HLA-A	0.000152917	0.360931	1	0.896	1
AKT3	0.000165955	0.275282	0.622	0.371	1
H2AFZ	0.000174769	-0.443103	0.959	0.923	1
YME1L1	0.000175204	0.281288	0.5	0.29	1
CCNG1	0.000180246	0.302651	0.446	0.245	1
CHML	0.000181883	0.255227	0.324	0.149	1
HCFC1R1	0.000185293	0.260025	0.419	0.219	1
SYT11	0.000195415	0.350836	0.689	0.446	1
SMARCC1	0.00019718	0.299434	0.649	0.437	1
CHD7	0.000198884	0.368919	0.581	0.374	1
SPECC1	0.000203416	0.309441	0.338	0.164	1
MDFI	0.000209232	0.338952	0.514	0.317	1
KCNQ1OT1	0.000212316	0.340492	0.216	0.083	1
FABP7	0.00021423	-0.448743	0.811	0.878	1
PCMT1	0.00022047	0.270887	0.554	0.324	1
ZBTB20	0.000224414	0.418138	0.703	0.513	1
RNPS1	0.000242507	0.292189	0.5	0.302	1
LMO2	0.000245789	0.2641	0.392	0.209	1
FOSB	0.000252465	0.303464	0.216	0.085	1
DYNLL1	0.000259242	-0.389304	0.811	0.89	1
IFI16	0.000263579	0.349668	0.689	0.462	1
SNHG14	0.000280789	0.427239	0.743	0.545	1
SMARCD1	0.000283263	0.315514	0.541	0.345	1
LHX2	0.000287375	0.350877	0.838	0.673	1
ARL4C	0.000300249	0.384806	0.797	0.617	1
NEUROD4	0.000303831	0.308996	0.608	0.406	1
C12orf57	0.000313312	-0.381783	0.716	0.853	1
TRIP12	0.000325872	0.301625	0.473	0.291	1
RNF187	0.000345239	0.359073	0.622	0.415	1
PCDHB2	0.000355408	0.294778	0.568	0.351	1
AL627171.2	0.000370982	0.475034	0.959	0.881	1
HINT1	0.000424077	-0.278497	0.973	0.971	1
SOX4	0.000426326	0.265451	1	1	1
CBR1	0.000443961	0.29853	0.338	0.173	1
MSL1	0.000468401	0.265632	0.351	0.182	1
GOLGA4	0.000469095	0.354899	0.527	0.358	1
ASCL1	0.000470629	0.329678	0.703	0.486	1
IGFBP2	0.00047095	-0.515603	0.851	0.899	1
USP9Y	0.000476816	0.259462	0.405	0.223	1
DDX39B	0.000480467	0.314109	0.676	0.468	1
MYO10	0.000522178	0.316585	0.622	0.415	1
MT-ND4L	0.000548243	0.294602	0.689	0.491	1
MRPS5	0.000569487	0.272269	0.486	0.29	1
CLASP2	0.000619748	0.34455	0.473	0.311	1
ELAVL4	0.000650107	0.318526	0.757	0.621	1
PTBP3	0.000672877	0.286948	0.405	0.23	1
2022-03-06	0.000681496	0.311536	0.5	0.32	1
CELF2	0.000682336	0.351492	0.689	0.523	1
PRDX1	0.000684682	-0.298479	0.959	0.959	1
ARF1	0.000719015	0.300825	0.662	0.469	1
DDX6	0.000723408	0.269121	0.649	0.453	1
USO1	0.000730666	0.258366	0.297	0.147	1
SOX9	0.000746733	0.357554	0.608	0.414	1
NAP1L1	0.00075722	0.373141	1	0.928	1
TAC3	0.000773772	0.543535	0.243	0.11	1
PHIP	0.000774975	0.281456	0.608	0.415	1
CASC15	0.000800609	0.26704	0.473	0.291	1
KIF26B	0.000804101	0.364523	0.432	0.27	1
ARHGAP5	0.000805502	0.27809	0.297	0.149	1
GPC2	0.000826682	0.273501	0.5	0.313	1
MIB1	0.000879941	0.31509	0.473	0.297	1
WDR45B	0.000893815	0.260198	0.324	0.169	1
ZFYVE16	0.000941038	0.255607	0.365	0.203	1
CKB	0.000983233	-0.418688	0.986	0.986	1
PTEN	0.00108859	0.282356	0.405	0.236	1
SLC39A10	0.00109737	0.316912	0.446	0.281	1
TAOK1	0.00109943	0.290309	0.459	0.282	1
SCG2	0.00114367	0.26777	0.297	0.151	1
IQGAP2	0.00116744	0.267942	0.23	0.103	1
GLCCI1	0.00116831	0.292285	0.405	0.246	1
MTA1	0.00126475	0.274206	0.324	0.176	1
FOXG1	0.0012988	0.272212	0.73	0.525	1
UBE2QL1	0.00132138	0.257958	0.432	0.257	1
COL4A2	0.001378	0.279856	0.297	0.16	1
WIPI2	0.00137814	0.259674	0.419	0.246	1
NHLH1	0.00141908	0.34863	0.622	0.45	1
DHX40	0.00144136	0.266721	0.297	0.155	1
TMSB4X	0.00149605	-0.265988	1	1	1
CCNL1	0.00160345	0.274143	0.527	0.353	1
KIF1B	0.00160495	0.255976	0.554	0.365	1
ZEB1	0.00166548	0.429642	0.662	0.495	1
FOS	0.00168583	0.383419	0.595	0.381	1
TUBA1B	0.00173646	-0.486996	0.838	0.862	1
IER2	0.00177023	0.296596	0.608	0.405	1
TMED4	0.00188108	0.26704	0.459	0.299	1
VIM	0.00189766	-0.437611	0.257	0.432	1
WAC	0.0018996	0.255591	0.5	0.322	1
ACTG1	0.0019485	-0.265839	1	0.998	1
ARPC3	0.0023038	-0.250508	0.608	0.746	1
CD24	0.00245862	0.332671	0.892	0.768	1
BRWD1	0.00250854	0.254755	0.365	0.216	1
QKI	0.00255322	0.27996	0.676	0.498	1
PFDN2	0.00261927	-0.286479	0.757	0.815	1
REV3L	0.00264076	0.28639	0.338	0.192	1
OTUD6B-AS1	0.00266015	0.297193	0.419	0.264	1
NTMT1	0.00279765	0.257411	0.365	0.223	1
MACF1	0.00297851	0.273776	0.527	0.369	1
DYNC1LI2	0.00312749	0.279011	0.608	0.45	1
MIAT	0.00330601	0.320238	0.608	0.439	1
CDC42EP3	0.00347846	0.251957	0.459	0.295	1
PSMD1	0.00349026	0.272863	0.473	0.311	1
RDX	0.00373906	0.298053	0.595	0.437	1
RGS16	0.00374206	0.597797	0.486	0.338	1
OLA1	0.00385867	0.253964	0.514	0.365	1
UQCRB	0.00394931	0.295931	0.959	0.932	1
NOTCH1	0.00429451	0.261913	0.446	0.291	1
MYEF2	0.00440228	0.30733	0.514	0.367	1
RASD1	0.00456159	0.437867	0.419	0.284	1
NPEPPS	0.00457719	0.25435	0.297	0.171	1
SEC31A	0.00462644	0.280947	0.446	0.295	1
EEF1A2	0.00466998	0.272544	0.622	0.455	1
GLCE	0.00489941	0.290276	0.311	0.182	1
ARID1B	0.00490313	0.282001	0.392	0.257	1
HIST1H1E	0.00534182	-0.446314	0.743	0.739	1
STMN4	0.00543324	0.262369	0.811	0.678	1
EEF1D	0.00548256	-0.272996	0.851	0.921	1
CDV3	0.00557058	0.276611	0.608	0.437	1
CSTB	0.00594987	0.257227	0.757	0.561	1
RBPJ	0.00650112	0.260097	0.919	0.788	1
GTF2I	0.00663567	0.251086	0.959	0.827	1
MKLN1	0.0066389	0.255961	0.365	0.234	1
CENPV	0.00703993	-0.304421	0.784	0.831	1
MALAT1	0.00715442	0.254771	1	1	1
HNRNPA2B1	0.00760748	-0.292833	0.892	0.914	1
CALD1	0.00795545	0.329304	0.838	0.728	1
SEPTIN7	0.00801337	-0.250569	0.676	0.77	1
APEX1	0.00819964	-0.2524	0.649	0.739	1
CCDC88A	0.00822514	0.258858	0.514	0.362	1
ESF1	0.00824659	0.274291	0.419	0.291	1
CLU	0.00847091	0.3382	0.527	0.41	1
SLCO5A1	0.00859091	0.271589	0.622	0.466	1
NPY	0.00864067	0.347609	0.27	0.156	1
MYL6	0.00976536	-0.255302	0.919	0.968	1
SPAG9	0.00976712	0.255716	0.689	0.543	1
PRDX5	0.010143	-0.308462	0.635	0.709	1
HRK	0.0114169	0.253704	0.257	0.144	1
NEUROG2	0.0121785	0.293087	0.622	0.487	1
POLR1D	0.0122072	0.253267	0.649	0.487	1
C11orf96	0.0123469	0.275915	0.23	0.128	1
SMARCD3	0.0145477	-0.286339	0.216	0.338	1
DBN1	0.0155107	0.259985	0.595	0.464	1
SLC25A6	0.0218421	-0.25596	0.919	0.865	1
NEDD8	0.0263202	-0.262504	0.649	0.725	1
JUN	0.0291725	0.281308	0.757	0.664	1
HMGN2	0.0400901	-0.336511	0.662	0.739	1
AL355075.4	0.0442903	0.252705	0.595	0.487	1
TBCB	0.0460279	-0.25205	0.419	0.509	1
PSMB3	0.051077	-0.259101	0.5	0.554	1
EGR1	0.0671814	0.311636	0.27	0.182	1
RTN1	0.0732029	-0.304879	0.284	0.365	1
H1F0	0.07914	0.31949	0.405	0.315	1
UBE2S	0.0831205	-0.432904	0.541	0.592	1
UBB	0.105389	-0.276765	0.757	0.754	1
PTAR1	0.106881	0.273451	0.27	0.207	1
NEAT1	0.122524	0.435353	0.216	0.149	1
HMGB2	0.281715	-0.287169	0.243	0.297	1
PTTG1	0.670289	-0.306191	0.257	0.23	1

## Sheet: early-EN3
	p_val	avg_log2FC	pct.1	pct.2	p_val_adj
RPS4Y1	4.00022e-51	1.27338	0.568	0	8.59166e-47
CHCHD2	9.74607e-28	0.81975	0.353	0.009	2.09326e-23
TTTY14	8.21786e-12	0.314482	0.194	0.018	1.76503e-07
PLCG2	5.32644e-11	0.437083	1	1	1.14401e-06
MAP3K13	5.71311e-11	0.394102	0.381	0.11	1.22706e-06
SCN1A	6.40794e-11	0.293668	0.216	0.03	1.3763e-06
IGFBP2	7.27714e-11	-0.569828	0.676	0.932	1.56298e-06
SEZ6L2	8.12452e-11	0.48692	0.583	0.244	1.74498e-06
AL627171.2	4.62968e-09	0.555995	0.971	0.967	9.94362e-05
TUBB3	1.30093e-08	-0.465151	0.928	0.997	0.000279415
NMT1	2.17446e-08	0.250044	0.259	0.065	0.00046703
SNHG14	2.47684e-08	0.480062	0.899	0.866	0.000531975
KDM5A	3.62385e-08	0.346661	0.338	0.116	0.000778331
NMNAT2	6.52112e-08	0.281071	0.259	0.074	0.00140061
GRIN2B	6.57312e-08	0.265248	0.18	0.033	0.00141178
CDKN1A	6.6307e-08	0.338886	0.295	0.092	0.00142414
DDB2	6.85385e-08	0.284872	0.266	0.077	0.00147207
MSMO1	1.22229e-07	0.359717	0.439	0.179	0.00262524
SERINC3	1.45006e-07	0.332986	0.309	0.104	0.00311444
PUS7L	1.47232e-07	0.273376	0.223	0.057	0.00316224
NDUFC2	1.63718e-07	-0.449937	0.705	0.875	0.00351633
RMRP	1.88753e-07	0.482222	0.705	0.408	0.00405404
ANGEL2	2.25577e-07	0.265384	0.201	0.048	0.00484495
PRDX1	3.20975e-07	-0.489124	0.727	0.887	0.0068939
SRGAP2C	3.35744e-07	0.250775	0.273	0.086	0.00721111
CSRNP3	3.49018e-07	0.320682	0.46	0.199	0.00749621
CREBRF	3.62627e-07	0.306696	0.36	0.137	0.00778851
SCN3A	5.40825e-07	0.270056	0.388	0.155	0.0116158
ASH1L	6.2016e-07	0.349789	0.468	0.208	0.0133198
AL355075.4	7.31286e-07	0.446913	0.878	0.699	0.0157066
LRRTM2	8.09717e-07	0.30375	0.453	0.199	0.0173911
KCNQ1OT1	8.95381e-07	0.433273	0.281	0.101	0.019231
ATXN2	9.15762e-07	0.276423	0.453	0.199	0.0196687
RPS6	9.87521e-07	-0.414585	0.856	0.982	0.02121
C16orf87	1.54682e-06	0.344343	0.46	0.217	0.0332227
NAPG	1.85615e-06	0.294541	0.309	0.122	0.0398663
PRDX2	1.91961e-06	-0.392357	0.813	0.946	0.0412295
CD63	1.98381e-06	-0.511224	0.518	0.705	0.0426083
MIR100HG	2.23332e-06	0.408622	0.799	0.53	0.0479672
PLEKHA5	2.28299e-06	0.326569	0.353	0.152	0.0490341
POGZ	2.2907e-06	0.270101	0.388	0.167	0.0491997
BHLHE22	2.49982e-06	0.459168	0.619	0.372	0.0536912
SKIL	2.70466e-06	0.306851	0.367	0.161	0.0580907
CHORDC1	2.79865e-06	0.259956	0.367	0.158	0.0601095
HMGCR	2.9033e-06	0.298593	0.281	0.101	0.062357
LINC00632	3.55342e-06	0.362965	0.763	0.5	0.0763203
VCAN	3.62005e-06	0.384408	0.432	0.202	0.0777514
LARP1	3.80303e-06	0.263299	0.374	0.161	0.0816815
MYL6	3.90811e-06	-0.377859	0.755	0.917	0.0839383
PTMA	4.97386e-06	-0.284211	0.993	1	0.106829
PPA1	5.28354e-06	-0.375775	0.755	0.872	0.11348
PPP1R14B	5.96583e-06	-0.389331	0.525	0.735	0.128134
RFK	6.48687e-06	0.307165	0.345	0.155	0.139325
NORAD	6.89529e-06	0.349998	0.54	0.289	0.148097
PHPT1	7.26307e-06	-0.3932	0.496	0.69	0.155996
ZMAT3	7.39827e-06	0.320994	0.381	0.173	0.1589
HERC1	8.29966e-06	0.25614	0.345	0.149	0.17826
ARPP21	8.76733e-06	0.472076	0.417	0.214	0.188305
ACTG1	9.14561e-06	-0.369751	0.957	0.994	0.196429
H3F3A	1.06608e-05	-0.271819	1	1	0.228972
CEBPZ	1.12374e-05	0.261599	0.453	0.223	0.241356
IRF2BPL	1.26333e-05	0.252315	0.46	0.226	0.271337
OSBPL8	1.28685e-05	0.354108	0.554	0.31	0.276389
COX6A1	1.33658e-05	-0.333281	0.626	0.866	0.287071
RNF187	1.46002e-05	0.278831	0.525	0.268	0.313582
C1orf61	1.47717e-05	-0.339601	0.741	0.911	0.317267
IFI16	1.59279e-05	0.304946	0.381	0.176	0.342099
RO60	1.82255e-05	0.301175	0.489	0.256	0.391448
MAPT	1.8373e-05	0.276175	0.489	0.25	0.394615
BRD2	1.86535e-05	0.276629	0.367	0.17	0.40064
FDFT1	1.91207e-05	0.341063	0.374	0.173	0.410675
RNF165	1.95626e-05	0.322845	0.482	0.262	0.420165
KLHL24	2.38707e-05	0.314374	0.381	0.185	0.512694
TSPAN7	2.44778e-05	0.266713	0.345	0.155	0.525733
GNAO1	2.75118e-05	0.337793	0.353	0.17	0.590899
CNOT2	2.76159e-05	0.38425	0.662	0.42	0.593135
SBK1	2.86796e-05	0.308423	0.446	0.229	0.61598
DDAH2	2.89869e-05	-0.338122	0.712	0.839	0.62258
CREBZF	2.97907e-05	0.25468	0.403	0.193	0.639845
VEZT	3.22642e-05	0.264118	0.432	0.211	0.69297
AAK1	3.33243e-05	0.326816	0.54	0.307	0.71574
B2M	3.43717e-05	-0.408497	0.906	0.958	0.738234
CKB	3.52256e-05	-0.393333	0.842	0.979	0.756576
ELOB	3.99447e-05	-0.320214	0.799	0.952	0.857933
GAPDH	4.44197e-05	-0.345767	0.777	0.979	0.954047
TNRC6B	4.48107e-05	0.362286	0.619	0.375	0.962444
RBM27	4.60684e-05	0.270009	0.331	0.155	0.989458
MED10	4.7357e-05	0.279001	0.496	0.271	1
DYNLL1	4.86326e-05	-0.356209	0.806	0.952	1
ATRX	4.97248e-05	0.309814	0.77	0.515	1
RPS19	5.64805e-05	0.304507	1	1	1
GRIA2	7.4027e-05	0.368724	0.827	0.616	1
MARCKS	8.12556e-05	-0.359818	0.964	0.997	1
HMGB1	9.14184e-05	-0.290436	0.993	1	1
ARL4C	9.86752e-05	0.297675	0.799	0.595	1
AIMP1	0.000109307	0.254517	0.403	0.205	1
BTF3	0.000120492	-0.292696	0.835	0.946	1
CAND1	0.000124282	0.252912	0.446	0.238	1
FABP5	0.000128998	-0.332886	0.612	0.842	1
MIF	0.000142543	-0.333324	0.921	0.979	1
PKIA	0.000145165	0.261404	0.417	0.22	1
CSDE1	0.000151251	0.300598	0.604	0.414	1
NDUFA13	0.000151268	-0.361106	0.64	0.75	1
ESF1	0.000171605	0.270374	0.417	0.226	1
ZEB2	0.000177797	0.336112	0.561	0.339	1
SERF2	0.00018663	-0.309503	0.396	0.595	1
TUBB	0.000217183	-0.281484	0.971	0.997	1
MGST3	0.000218576	-0.290291	0.518	0.702	1
SRSF3	0.0002224	-0.432892	0.518	0.61	1
SPTBN1	0.000225628	0.253632	0.453	0.253	1
HSPH1	0.000228658	0.266713	0.317	0.161	1
ZNF793	0.000299103	0.251572	0.237	0.107	1
SQLE	0.000304237	0.308003	0.381	0.205	1
ZBTB18	0.000306782	0.353866	0.791	0.574	1
SEC63	0.000334864	0.287452	0.604	0.375	1
RB1CC1	0.000348204	0.308401	0.468	0.283	1
CXADR	0.000357129	0.278068	0.568	0.351	1
PANTR1	0.000450979	-0.494973	0.324	0.458	1
ANKRD11	0.000455916	0.352684	0.727	0.554	1
BOD1L1	0.000511959	0.264274	0.626	0.393	1
HLA-A	0.000523749	-0.297283	0.827	0.902	1
KIFAP3	0.000525855	0.278575	0.496	0.304	1
EEF1B2	0.000540821	-0.268167	0.827	0.952	1
ATP6V1G1	0.000569928	-0.294084	0.698	0.845	1
NDUFB11	0.000599232	-0.29496	0.633	0.777	1
ZRANB2	0.000649863	0.263392	0.54	0.339	1
PPP2R5E	0.000653553	0.262884	0.496	0.31	1
NREP	0.000678032	0.298957	0.863	0.854	1
LAPTM4B	0.000681054	-0.433577	0.194	0.307	1
ANK3	0.00069745	0.289075	0.324	0.176	1
MYCBP2	0.000763569	0.250127	0.532	0.327	1
KIAA0408	0.000800217	0.255643	0.532	0.336	1
ERH	0.000986902	-0.255003	0.683	0.827	1
RBMX	0.000993232	0.257231	0.59	0.381	1
PCBP2	0.0010701	0.250456	0.525	0.336	1
SUMO2	0.00117972	-0.29378	0.942	0.997	1
CAMK2N1	0.00136991	0.328343	0.942	0.97	1
TMA7	0.00143835	-0.315523	0.468	0.583	1
CALM2	0.00156251	-0.263824	0.978	0.997	1
STMN1	0.00162011	-0.285552	0.971	0.997	1
NR2F1	0.00200905	0.294489	0.705	0.518	1
CHD2	0.0020141	0.254447	0.453	0.283	1
CELF2	0.00285299	0.285796	0.626	0.443	1
ZNF292	0.00397717	0.257652	0.662	0.479	1
EZR	0.00465999	-0.347789	0.331	0.438	1
RTN1	0.00524301	-0.312914	0.705	0.723	1
PCDHGA10	0.00597594	-0.289119	0.065	0.152	1
MLLT11	0.00891442	-0.273339	0.633	0.699	1
CD81	0.00901897	-0.341581	0.439	0.482	1
HLA-C	0.00913684	-0.316284	0.784	0.833	1
GABARAPL2	0.0100856	-0.293862	0.568	0.61	1
COMMD7	0.0101937	-0.271667	0.165	0.259	1
CENPV	0.0149283	-0.252507	0.705	0.705	1
AL512590.3	0.0156444	-0.313863	0.252	0.345	1
AP1S2	0.0221589	-0.360179	0.439	0.473	1
HES4	0.0289959	-0.272499	0.317	0.375	1
C1QBP	0.0311905	-0.267192	0.295	0.363	1
KTN1	0.0317901	-0.349554	0.309	0.354	1
RABAC1	0.0340875	-0.309155	0.281	0.333	1
HMGN3	0.0359915	-0.295917	0.353	0.387	1
GADD45GIP1	0.0466594	-0.291151	0.396	0.423	1
ID1	0.0660254	-0.376239	0.094	0.149	1
AFDN	0.0826461	-0.256243	0.482	0.485	1

## Sheet: early-EN2
	p_val	avg_log2FC	pct.1	pct.2	p_val_adj
RPS4Y1	1.18606e-63	1.79879	0.876	0	2.54742e-59
CHCHD2	3.99718e-35	1.2593	0.663	0.056	8.58515e-31
CHL1	4.42616e-24	0.553317	0.396	0	9.5065e-20
PMP2	4.42856e-19	0.582762	0.373	0.023	9.51165e-15
GRIN2B	3.29658e-16	0.503759	0.391	0.056	7.08039e-12
ST6GALNAC5	1.71903e-13	0.459942	0.385	0.074	3.69214e-09
MAP3K13	9.25648e-12	0.510812	0.645	0.33	1.98811e-07
RPS6	1.40239e-11	-0.536823	0.893	0.94	3.01204e-07
TUBB3	3.65514e-11	-0.455438	1	0.995	7.85051e-07
BHLHE22	3.89634e-11	0.65089	0.888	0.684	8.36856e-07
CNOT2	6.25771e-11	0.540639	0.917	0.721	1.34403e-06
H3F3A	6.76626e-11	-0.298093	1	1	1.45326e-06
B2M	2.33903e-10	-0.49176	0.947	0.986	5.02377e-06
PID1	3.02516e-10	0.347313	0.349	0.084	6.49744e-06
PPP1R14C	4.14878e-10	0.403023	0.444	0.153	8.91075e-06
SCN2A	7.65974e-10	0.335087	0.349	0.093	1.64516e-05
TLE1	1.12668e-09	0.555118	0.509	0.228	2.41989e-05
VWC2	1.61443e-09	0.366338	0.254	0.042	3.46748e-05
DNER	2.70198e-09	0.448759	0.592	0.293	5.80332e-05
PJA1	2.84139e-09	0.347313	0.473	0.181	6.10273e-05
IFI16	2.85498e-09	0.439343	0.675	0.381	6.13192e-05
MCPH1	4.65463e-09	0.34134	0.367	0.116	9.99722e-05
DNM3	5.09138e-09	0.359139	0.367	0.116	0.000109353
ATP1A1	5.15238e-09	0.416974	0.538	0.26	0.000110663
RPS19	5.22165e-09	0.345401	1	1	0.000112151
CAMK4	5.68351e-09	0.479764	0.888	0.66	0.000122071
NREP	6.44839e-09	0.405396	0.976	0.935	0.000138499
CACNB4	7.66543e-09	0.430227	0.71	0.437	0.000164638
HMGB1	8.26185e-09	-0.338321	0.994	1	0.000177448
PRKAB2	1.60109e-08	0.317566	0.373	0.126	0.000343882
SEZ6L2	1.63339e-08	0.426957	0.763	0.498	0.00035082
RPRML	2.6885e-08	0.500358	0.438	0.181	0.000577436
ARL4C	2.98004e-08	0.496664	0.982	0.898	0.000640053
SYT13	3.70642e-08	0.347313	0.337	0.112	0.000796064
C2orf49	3.85214e-08	0.300958	0.414	0.163	0.000827362
ZNF226	4.02102e-08	0.335725	0.396	0.153	0.000863636
PCGF2	5.58328e-08	0.320547	0.509	0.242	0.00119918
AC027031.2	6.1366e-08	0.378229	0.491	0.228	0.00131802
SNHG8	6.47494e-08	0.449525	0.734	0.498	0.00139069
HLA-A	6.60222e-08	-0.429528	0.828	0.944	0.00141803
H2AFX	7.97648e-08	0.250452	0.266	0.065	0.00171319
TSPAN18	8.31477e-08	0.308494	0.686	0.386	0.00178585
NCALD	8.79826e-08	0.323268	0.343	0.121	0.00188969
JDP2	9.36661e-08	0.284027	0.284	0.079	0.00201176
ARMCX1	1.44361e-07	0.283748	0.272	0.074	0.00310058
RPS23	1.67638e-07	0.253721	1	1	0.00360053
CAMK2N1	1.84846e-07	0.400753	1	0.935	0.00397013
FAM168B	2.07316e-07	0.285674	0.432	0.181	0.00445273
TMEM59L	2.22307e-07	0.320645	0.485	0.233	0.00477472
FAM171B	2.24426e-07	0.369612	0.633	0.381	0.00482022
PRDX1	2.87218e-07	-0.44987	0.817	0.916	0.00616887
MT-CYB	2.88294e-07	-0.335881	0.982	1	0.00619198
IGFBP2	2.93781e-07	-0.42731	0.633	0.819	0.00630982
PDP1	3.11436e-07	0.26134	0.325	0.112	0.00668903
TMOD2	3.27437e-07	0.365692	0.769	0.535	0.00703268
PLCG2	3.29678e-07	0.356833	1	1	0.00708083
ATP2A2	3.36679e-07	0.31105	0.515	0.256	0.00723119
GPN3	3.90463e-07	0.261705	0.337	0.121	0.00838636
RPS12	3.94077e-07	0.271529	1	1	0.00846398
KIAA0895L	3.96129e-07	0.279675	0.426	0.181	0.00850806
BRINP1	4.29667e-07	0.303874	0.278	0.084	0.00922838
DTX3	4.3437e-07	0.289828	0.414	0.181	0.00932939
NDUFAF2	4.62313e-07	0.312307	0.544	0.293	0.00992955
ARPC5L	5.21424e-07	0.332415	0.55	0.293	0.0111992
FSD1L	5.22391e-07	0.286983	0.544	0.27	0.0112199
ANK2	5.29892e-07	0.412246	0.787	0.535	0.011381
CCNI	5.68974e-07	0.28752	1	1	0.0122204
SMARCA2	5.80656e-07	0.259496	0.379	0.149	0.0124713
DDB2	6.1237e-07	0.259086	0.284	0.088	0.0131525
C8orf33	7.1883e-07	0.326404	0.497	0.251	0.015439
ABHD2	7.71128e-07	0.259851	0.302	0.102	0.0165623
DNAH10OS	8.58697e-07	0.251736	0.278	0.088	0.0184431
TTTY14	8.64639e-07	0.436812	0.361	0.158	0.0185707
NEO1	8.98777e-07	0.423041	0.639	0.414	0.0193039
DUSP4	9.02343e-07	0.266277	0.272	0.084	0.0193805
NRN1	9.07984e-07	-0.505512	0.296	0.512	0.0195017
APBB1	1.12202e-06	0.291388	0.432	0.2	0.0240988
LMO1	1.15197e-06	0.264487	0.26	0.079	0.024742
KCNK12	1.25961e-06	0.347313	0.402	0.181	0.0270538
SCG2	1.33104e-06	0.431378	0.444	0.205	0.0285881
DTNA	1.33849e-06	0.31572	0.479	0.242	0.0287482
UBQLN1	1.36286e-06	0.30929	0.686	0.437	0.0292716
GAS5	1.41413e-06	0.340989	0.988	0.963	0.0303726
PPP3CA	1.50704e-06	0.447325	0.734	0.502	0.0323682
DLG4	1.60825e-06	0.266501	0.391	0.167	0.034542
MT-CO2	2.03216e-06	-0.255324	1	1	0.0436468
ATN1	2.09789e-06	0.283402	0.55	0.298	0.0450585
ANKRD28	2.10496e-06	0.266501	0.391	0.172	0.0452103
PCDHGB6	2.20676e-06	0.312307	0.479	0.242	0.0473969
ARHGEF12	2.24732e-06	0.320938	0.473	0.247	0.0482679
DNAJC12	2.33107e-06	0.27576	0.331	0.13	0.0500666
THAP12	2.44879e-06	0.276924	0.45	0.219	0.0525952
EDIL3	2.51526e-06	0.270204	0.42	0.191	0.0540227
SERINC3	2.53348e-06	0.312687	0.367	0.163	0.0544141
MAPKAPK5-AS1	2.57144e-06	0.252504	0.515	0.27	0.0552295
RPL36A	2.67805e-06	0.298759	1	0.995	0.0575192
KAZN	3.04132e-06	0.330172	0.355	0.153	0.0653215
ELOVL4	3.4726e-06	0.252677	0.361	0.153	0.0745846
ACTB	3.47931e-06	-0.290117	0.994	1	0.0747285
RPL36	3.80392e-06	0.273147	0.994	0.995	0.0817005
SAT1	3.8685e-06	0.351705	0.598	0.353	0.0830875
RTN4	3.98094e-06	0.251129	1	0.991	0.0855025
THRA	4.03962e-06	0.339208	0.698	0.484	0.0867629
SEPTIN6	4.82315e-06	0.290527	0.491	0.265	0.103592
PDE4B	4.86172e-06	0.275851	0.426	0.209	0.10442
ZFAS1	4.89224e-06	0.32996	0.976	0.921	0.105075
ARMCX3	4.90055e-06	0.283588	0.615	0.381	0.105254
NOVA1	5.05105e-06	-0.404759	0.32	0.507	0.108486
RABAC1	5.11153e-06	-0.39743	0.527	0.693	0.109785
SCRG1	5.37406e-06	0.364771	0.893	0.698	0.115424
GPR12	5.52828e-06	0.271932	0.456	0.233	0.118736
PKD1	6.63047e-06	0.279675	0.402	0.2	0.142409
DUSP6	7.48175e-06	0.387154	0.308	0.126	0.160693
ATP2B2	7.545e-06	0.259518	0.45	0.233	0.162052
MT-ATP6	8.75007e-06	-0.251889	1	1	0.187934
GABARAPL1	8.94756e-06	0.283655	0.462	0.251	0.192176
ZMAT3	8.96172e-06	0.297465	0.391	0.186	0.19248
AFF3	9.19808e-06	0.31992	0.568	0.344	0.197556
CAMK2D	9.84676e-06	0.315835	0.45	0.233	0.211489
KIF5A	9.9046e-06	0.265145	0.509	0.279	0.212731
ACTG1	9.94202e-06	-0.313301	0.976	0.986	0.213535
JUN	1.06978e-05	0.427647	0.905	0.809	0.229767
SS18L2	1.086e-05	0.266393	0.45	0.242	0.233251
ANKRD17	1.09717e-05	0.302459	0.515	0.307	0.23565
DPP6	1.11864e-05	0.313761	0.385	0.191	0.240261
ZEB2	1.14366e-05	0.422438	0.781	0.605	0.245635
CTNNA1	1.19252e-05	0.290323	0.473	0.256	0.25613
PCDH8	1.24075e-05	0.335787	0.71	0.493	0.266488
GDAP1L1	1.24237e-05	0.265112	0.615	0.381	0.266837
EPN2	1.24941e-05	0.252768	0.414	0.205	0.268348
SLC25A6	1.30084e-05	-0.359454	0.462	0.647	0.279395
ADD2	1.30736e-05	0.27425	0.615	0.386	0.280795
CTTNBP2NL	1.34467e-05	0.284473	0.568	0.34	0.288808
ATAT1	1.35774e-05	0.255521	0.533	0.307	0.291615
GNAO1	1.36088e-05	0.283934	0.675	0.442	0.29229
BBC3	1.40188e-05	0.279409	0.367	0.172	0.301095
SH3BP5	1.44155e-05	0.311601	0.775	0.586	0.309617
MED6	1.45304e-05	0.274118	0.491	0.279	0.312083
ATP6V1G1	1.67831e-05	-0.313444	0.852	0.926	0.360467
RAD21	1.68883e-05	0.412842	0.876	0.744	0.362728
IGSF21	1.74747e-05	0.293475	0.42	0.223	0.375322
SNX10	1.78661e-05	0.273604	0.391	0.195	0.383728
PRDX2	1.79098e-05	-0.341485	0.876	0.958	0.384667
SV2A	1.84615e-05	0.253531	0.485	0.265	0.396516
ANK3	1.88775e-05	0.321853	0.592	0.377	0.405451
FBXW11	1.9543e-05	0.272546	0.538	0.316	0.419745
PRSS12	2.07514e-05	0.260602	0.278	0.112	0.445699
INIP	2.1357e-05	0.267143	0.379	0.191	0.458705
DYRK2	2.14326e-05	0.267143	0.503	0.284	0.46033
CPLX2	2.22143e-05	0.313499	0.373	0.186	0.477118
RPS10	2.22466e-05	0.3436	0.698	0.54	0.477812
LSM10	2.29772e-05	0.256801	0.538	0.316	0.493503
CKB	2.45766e-05	-0.320473	0.929	0.981	0.527856
BLOC1S6	2.46779e-05	0.280394	0.669	0.465	0.530032
ADGRB2	2.49237e-05	0.305493	0.462	0.27	0.535312
ZNF197	3.39864e-05	0.252677	0.331	0.153	0.72996
MIF	3.43579e-05	-0.304022	0.964	0.967	0.737939
SLC4A7	3.55644e-05	0.303812	0.515	0.316	0.763852
PGM2L1	3.59483e-05	0.286468	0.639	0.433	0.772098
RASL10A	3.92407e-05	0.2882	0.402	0.205	0.842811
PDE1A	4.16608e-05	0.278395	0.604	0.381	0.894791
ADGRB3	4.25225e-05	0.260834	0.432	0.233	0.913297
MCUR1	4.38638e-05	0.284948	0.355	0.177	0.942107
AGPS	4.4265e-05	0.26614	0.58	0.353	0.950724
SARS	4.74461e-05	0.281263	0.905	0.763	1
DYNLL1	4.86452e-05	-0.311294	0.876	0.912	1
SNHG14	4.87935e-05	0.315835	0.917	0.902	1
IDS	5.07614e-05	0.264138	0.657	0.442	1
IGBP1	5.13023e-05	0.260161	0.497	0.298	1
PKIA	5.5841e-05	0.325673	0.728	0.558	1
GAPDH	5.64474e-05	-0.289521	0.852	0.93	1
BDP1	5.9429e-05	0.259555	0.515	0.316	1
PUS7L	6.18838e-05	0.254578	0.337	0.163	1
LMO4	6.21099e-05	0.27932	0.71	0.507	1
CELF2	6.25183e-05	0.335584	0.822	0.698	1
AL355075.4	6.31643e-05	0.347313	0.71	0.553	1
IRF2BPL	6.37153e-05	0.263847	0.627	0.433	1
NRGN	6.43837e-05	0.287192	0.284	0.126	1
DLG1	6.48301e-05	0.347313	0.45	0.279	1
SNRNP27	7.18389e-05	0.268242	0.509	0.316	1
HERC1	7.18965e-05	0.254204	0.538	0.326	1
CALM3	7.51056e-05	0.262324	0.769	0.581	1
EXOC4	7.96995e-05	0.26047	0.497	0.302	1
EPB41L4A-AS1	8.45331e-05	0.309094	0.805	0.628	1
SEC61A1	9.45146e-05	0.273583	0.45	0.27	1
ACVR2A	9.5573e-05	0.27871	0.592	0.381	1
SNHG29	9.64381e-05	-0.287498	0.864	0.93	1
AL512590.3	0.000101088	-0.342731	0.627	0.763	1
SLC7A11	0.00010121	0.290914	0.509	0.321	1
RAPGEF6	0.000102966	0.258904	0.444	0.256	1
FHL1	0.000117464	0.256668	0.556	0.363	1
TPGS2	0.000119532	0.252454	0.621	0.419	1
DSTN	0.00013381	0.274473	0.899	0.814	1
STXBP1	0.00013963	0.277679	0.704	0.512	1
ARGLU1	0.000148582	-0.354815	0.722	0.842	1
APLP2	0.000152204	0.290482	0.811	0.651	1
FZD3	0.000156345	-0.357726	0.402	0.563	1
GAP43	0.00016064	0.329204	0.97	0.94	1
SLAIN1	0.000161173	0.254204	0.479	0.302	1
PCDHGA10	0.00016635	-0.347832	0.112	0.256	1
PRDM2	0.000171266	0.256367	0.562	0.367	1
CCDC71L	0.000178809	0.263335	0.592	0.395	1
ARHGEF9	0.000186401	0.262863	0.515	0.326	1
CACNA2D1	0.000189503	0.27978	0.562	0.381	1
TSPAN7	0.000199503	0.254204	0.533	0.335	1
MTF2	0.00022854	0.25589	0.627	0.442	1
TCEAL7	0.000228719	0.259609	0.68	0.498	1
SCN3A	0.000256472	0.257938	0.456	0.284	1
HLA-C	0.000272888	-0.350417	0.775	0.879	1
TAOK1	0.000274415	0.259048	0.609	0.423	1
RSBN1L	0.000274959	0.263545	0.704	0.53	1
GNAI1	0.00029953	0.255195	0.728	0.535	1
NDUFA11	0.000310786	-0.304763	0.568	0.679	1
ZNF428	0.00032382	-0.285382	0.905	0.912	1
DANCR	0.000334415	-0.318139	0.385	0.526	1
ZBTB20	0.000337039	0.316203	0.657	0.512	1
MIR100HG	0.000408272	0.285719	0.899	0.837	1
EPS8	0.000429122	0.260181	0.385	0.223	1
CXADR	0.000435688	0.269311	0.781	0.633	1
SNAP25	0.000453052	0.301631	0.686	0.526	1
STARD4-AS1	0.000505719	0.25622	0.87	0.716	1
UNC5D	0.000509059	-0.280354	0.308	0.46	1
C1orf21	0.000558991	0.255134	0.852	0.688	1
ZNF148	0.000583303	0.254476	0.639	0.46	1
ADRA2A	0.00058972	-0.301323	0.278	0.433	1
EGR1	0.000594711	0.325354	0.462	0.293	1
IER2	0.00065489	0.307905	0.515	0.34	1
PLXNA2	0.000769875	0.270796	0.97	0.912	1
IGFBPL1	0.00083159	-0.321611	0.651	0.74	1
MYT1L	0.000871912	0.277804	0.852	0.753	1
VCAN	0.000924752	0.370849	0.444	0.312	1
GRIA2	0.000959143	0.279065	0.893	0.772	1
KIF5B	0.00114903	-0.262992	0.722	0.809	1
HERPUD1	0.00120059	0.257116	0.598	0.433	1
RTN1	0.00122378	-0.27737	0.905	0.94	1
LINC00461	0.00137648	-0.283784	0.893	0.926	1
FGFBP3	0.00162261	-0.337678	0.651	0.735	1
SYNE2	0.00163255	-0.299694	0.568	0.665	1
SMARCD3	0.00191043	-0.290466	0.574	0.637	1
FILIP1	0.00298876	0.290039	0.485	0.34	1
SLA	0.00541959	-0.264616	0.692	0.772	1
TMPO	0.00572137	-0.262102	0.633	0.684	1
SRSF3	0.00844997	-0.295343	0.775	0.823	1
LAPTM4B	0.0103779	-0.264544	0.402	0.493	1
TMSB15A	0.0158855	-0.262227	0.527	0.581	1
EIF3K	0.0179482	-0.251324	0.574	0.66	1
ID1	0.0194162	-0.343518	0.142	0.228	1
PANTR1	0.019675	-0.251499	0.497	0.595	1
AP1S2	0.0388108	-0.274175	0.669	0.679	1
FABP5	0.344124	0.256652	0.805	0.823	1
FABP7	0.404288	0.269175	0.935	0.907	1

## Sheet: early-EN1
	p_val	avg_log2FC	pct.1	pct.2	p_val_adj
RPS4Y1	1.0609e-237	1.79951	0.84	0	2.27861e-233
CHCHD2	3.32298e-117	1.2945	0.591	0.034	7.13709e-113
CHL1	4.07205e-47	0.296132	0.181	0	8.74595e-43
PMP2	5.27644e-46	0.478251	0.312	0.032	1.13327e-41
ARMCX1	5.1172e-28	0.307473	0.278	0.051	1.09907e-23
H3F3A	5.41055e-22	-0.318215	1	1	1.16208e-17
MAP3K13	1.98487e-20	0.43194	0.498	0.214	4.2631e-16
TUBB3	1.07426e-19	-0.391719	0.996	0.998	2.30729e-15
IFI16	3.99513e-18	0.394251	0.574	0.282	8.58073e-14
SEZ6L2	4.95517e-17	0.431441	0.658	0.373	1.06427e-12
BBC3	9.35509e-17	0.33467	0.397	0.159	2.00929e-12
IGFBP2	1.03498e-16	-0.517701	0.73	0.851	2.22293e-12
SLC4A7	2.37313e-16	0.358185	0.481	0.224	5.09701e-12
ACTG1	4.25651e-16	-0.439365	0.992	0.993	9.14212e-12
RPS10	4.31792e-16	0.4132	0.84	0.559	9.27402e-12
BHLHE22	4.78557e-16	0.514266	0.734	0.486	1.02784e-11
LRRTM2	7.18671e-16	0.336573	0.447	0.203	1.54356e-11
CDKN1A	1.37205e-15	0.343794	0.249	0.075	2.9469e-11
NR2F1	2.60408e-15	0.484621	0.835	0.599	5.59305e-11
RPS19	3.17192e-15	0.331834	1	1	6.81264e-11
ARL4C	1.78429e-14	0.532153	0.869	0.669	3.83229e-10
CKB	2.04495e-14	-0.388572	0.966	0.982	4.39214e-10
ZNF506	5.72089e-14	0.267493	0.329	0.131	1.22873e-09
SLC8A1	1.62785e-13	0.285822	0.325	0.131	3.4963e-09
DPP6	2.32989e-13	0.251136	0.249	0.085	5.00414e-09
IFRD1	3.12867e-13	0.339804	0.565	0.323	6.71975e-09
GAPDH	3.76275e-13	-0.398025	0.924	0.961	8.08163e-09
PRDX1	3.91576e-13	-0.456819	0.878	0.912	8.41027e-09
RPS6	7.87416e-13	-0.377768	0.975	0.992	1.69121e-08
NUPR1	1.68466e-12	0.397409	0.312	0.129	3.61832e-08
PPP1R14C	1.98773e-12	0.269876	0.186	0.054	4.26925e-08
RPL39	2.80064e-12	0.270919	1	1	6.01522e-08
RPL36A	3.28254e-12	0.286984	1	0.995	7.05023e-08
FILIP1	3.60387e-12	0.341544	0.376	0.179	7.74039e-08
PLK2	3.9289e-12	0.274833	0.287	0.114	8.4385e-08
CCDC136	4.28554e-12	0.260465	0.329	0.142	9.20448e-08
SAT1	6.23963e-12	0.407543	0.443	0.234	1.34015e-07
PCDH8	6.42527e-12	0.326937	0.43	0.219	1.38002e-07
GABARAPL1	1.74393e-11	0.307421	0.359	0.172	3.74561e-07
ZEB2	1.93784e-11	0.378803	0.62	0.381	4.16209e-07
TCEAL7	1.9647e-11	0.363883	0.629	0.398	4.21978e-07
RPS27L	2.32585e-11	0.351092	0.814	0.566	4.99545e-07
DSTN	5.23562e-11	0.352795	0.899	0.702	1.12451e-06
NREP	8.87e-11	0.347166	0.941	0.828	1.9051e-06
MIR100HG	1.19703e-10	0.378868	0.747	0.565	2.57099e-06
CAMK2N1	1.51041e-10	0.375172	0.987	0.93	3.24407e-06
MYCBP2	2.82809e-10	0.333469	0.603	0.388	6.07416e-06
CNOT2	3.1419e-10	0.343731	0.743	0.552	6.74818e-06
KCNMB4	4.21444e-10	0.311458	0.633	0.426	9.05177e-06
HMGB1	6.04838e-10	-0.265142	1	1	1.29907e-05
ZMAT3	7.15812e-10	0.250118	0.316	0.148	1.53742e-05
CCNI	7.33569e-10	0.280186	0.996	0.989	1.57556e-05
ZBTB20	9.92591e-10	0.31496	0.536	0.332	2.13189e-05
ACTB	1.01577e-09	-0.292153	0.992	0.993	2.18166e-05
FOSB	1.14418e-09	0.329581	0.249	0.106	2.45747e-05
VCAN	1.17109e-09	0.311855	0.38	0.2	2.51526e-05
MARCKS	1.369e-09	-0.318971	0.983	0.986	2.94034e-05
LMO4	2.74534e-09	0.344276	0.616	0.42	5.89645e-05
PKIA	5.71885e-09	0.30008	0.561	0.366	0.000122829
RPRML	6.29577e-09	0.267983	0.19	0.071	0.00013522
STARD4-AS1	6.37471e-09	0.292012	0.743	0.534	0.000136916
CCND2	6.42755e-09	0.329218	0.873	0.703	0.000138051
DUSP8	7.82895e-09	0.272658	0.418	0.241	0.00016815
AHCYL1	1.01628e-08	0.281162	0.443	0.268	0.000218276
COX7C	1.22411e-08	0.252211	0.996	0.975	0.000262913
C14orf132	1.31415e-08	0.292977	0.608	0.423	0.000282253
CACNA2D1	1.63142e-08	0.268795	0.401	0.227	0.000350396
FOS	2.10707e-08	0.483318	0.616	0.432	0.000452557
SORT1	2.18656e-08	0.290627	0.439	0.263	0.00046963
GAS5	2.23539e-08	0.287611	0.996	0.982	0.000480117
BOD1L1	2.44034e-08	0.304951	0.679	0.477	0.000524136
PRDX2	3.2078e-08	-0.29105	0.937	0.95	0.000688972
EGR1	4.24701e-08	0.253416	0.447	0.267	0.000912173
CADPS	4.52275e-08	0.295594	0.426	0.26	0.000971396
ATP5IF1	5.74322e-08	0.273404	0.797	0.577	0.00123353
PSAP	5.79281e-08	0.267039	0.561	0.374	0.00124418
ANK2	6.19966e-08	0.2812	0.519	0.341	0.00133156
DNER	7.06218e-08	0.258998	0.367	0.209	0.00151681
SRSF3	1.01253e-07	-0.345886	0.743	0.786	0.00217471
FSCN1	1.18455e-07	0.260278	0.641	0.449	0.00254417
THRA	1.31608e-07	0.262688	0.544	0.369	0.00282668
ZMAT2	1.48027e-07	0.259061	0.574	0.392	0.00317933
SNHG8	1.48052e-07	0.31584	0.662	0.479	0.00317986
PLCG2	1.52964e-07	0.310366	0.996	0.999	0.00328536
BPTF	1.70031e-07	0.262128	0.658	0.478	0.00365193
TCAF1	2.06197e-07	0.258044	0.57	0.388	0.0044287
GNAI1	3.27685e-07	0.280582	0.477	0.314	0.00703801
SNHG14	4.83254e-07	0.319823	0.793	0.654	0.0103793
IRF2BPL	5.28736e-07	0.262278	0.468	0.314	0.0113562
MAPT	6.73632e-07	0.253095	0.591	0.423	0.0144683
RAD21	8.0999e-07	0.289119	0.675	0.481	0.017397
SNHG6	1.09894e-06	0.276842	0.92	0.85	0.023603
PLXNA2	1.25706e-06	0.278291	0.73	0.56	0.0269992
JUN	1.47499e-06	0.349004	0.878	0.771	0.0316798
PEG10	1.64981e-06	0.275345	0.684	0.532	0.0354346
AL355075.4	1.95077e-06	0.312899	0.692	0.536	0.0418986
DYNLL1	1.95326e-06	-0.267278	0.873	0.898	0.0419522
MT-ND1	2.00803e-06	0.295862	1	0.999	0.0431285
MT-ND4L	2.98674e-06	0.254833	0.751	0.604	0.0641492
SLC25A6	4.39159e-06	-0.352808	0.608	0.678	0.0943227
RMRP	6.63372e-06	0.26316	0.473	0.325	0.142479
EPS15	7.05482e-06	0.283967	0.414	0.29	0.151524
CAMK4	1.60098e-05	0.282559	0.414	0.294	0.343859
RASD1	1.66514e-05	0.28044	0.435	0.301	0.357638
SEMA3C	1.69635e-05	0.263511	0.726	0.605	0.364341
DUSP1	2.26644e-05	0.251086	0.489	0.338	0.486786
HLA-C	4.97363e-05	-0.273723	0.899	0.906	1
NDUFA11	7.51886e-05	-0.278383	0.544	0.628	1
AL512590.3	0.000468325	-0.3058	0.468	0.547	1
AL627171.2	0.000497266	0.402001	0.932	0.913	1
CD63	0.000831986	-0.251715	0.713	0.737	1
VIM	0.00583679	-0.253589	0.304	0.377	1

## Sheet: iIN
	p_val	avg_log2FC	pct.1	pct.2	p_val_adj
RPS4Y1	1.00969e-10	0.93152	0.417	0	2.1686e-06
CHCHD2	1.69049e-07	0.744589	0.298	0	0.00363083
HMGB1	4.95934e-05	-0.506332	0.98	0.987	1
RPL10	6.50809e-05	-0.45644	1	1	1
MED10	7.20218e-05	0.597072	0.623	0.347	1
VIM	0.000106171	-0.495663	0.583	0.773	1
ZMAT3	0.000361101	0.474016	0.47	0.2	1
CDKN1A	0.000382896	0.732616	0.43	0.187	1
PPP4R3A	0.000474373	0.379741	0.364	0.133	1
LINC01551	0.000704852	-0.449286	0.113	0.28	1
NR2F1	0.000714046	0.556761	0.576	0.347	1
DDX42	0.000757521	0.397039	0.305	0.107	1
RGS16	0.00081565	0.524096	0.358	0.133	1
JUN	0.000817614	-0.442058	0.483	0.733	1
MANF	0.000869387	-0.281132	0.073	0.227	1
MAGEH1	0.000888719	0.384192	0.364	0.147	1
ZNF451	0.000910039	0.3406	0.318	0.107	1
STMN1	0.00100203	-0.431996	0.828	0.96	1
KITLG	0.0010154	0.319722	0.185	0.027	1
TPGS1	0.00108047	-0.313592	0.06	0.2	1
CORO1C	0.0011051	0.308775	0.245	0.067	1
SEC61B	0.00115347	-0.424624	0.728	0.84	1
CDK5RAP3	0.00124258	0.297842	0.205	0.04	1
MRPL3	0.00130753	0.347966	0.219	0.053	1
ZNF483	0.00135798	0.399219	0.285	0.093	1
ANKRD44	0.00138852	0.30849	0.126	0	1
TMEM167A	0.00149218	0.341488	0.364	0.147	1
C1QL1	0.0015288	-0.32606	0.04	0.16	1
MT-CO1	0.00162164	-0.799794	0.947	1	1
SUMO2	0.0020139	-0.411089	0.934	0.973	1
RORB	0.00201992	-0.408413	0.113	0.267	1
SEZ6L2	0.00202937	0.387485	0.358	0.147	1
UBC	0.00213073	-0.350255	0.98	1	1
MAP3K13	0.0021481	0.384192	0.331	0.133	1
MALAT1	0.00220257	0.352566	1	1	1
IMPAD1	0.0022481	0.301056	0.166	0.027	1
NEDD8	0.00229965	-0.323247	0.523	0.693	1
TIMM44	0.00238517	0.294855	0.232	0.067	1
COPB2	0.00239711	0.347966	0.364	0.16	1
ATF7IP	0.00242398	0.359196	0.43	0.213	1
HNRNPA1	0.00257165	-0.413396	0.801	0.92	1
FBXL5	0.00262601	0.253448	0.285	0.093	1
SUCO	0.00265619	0.335426	0.47	0.227	1
SDCBP	0.00265971	0.35031	0.291	0.107	1
ZNF518A	0.00275424	0.27909	0.185	0.04	1
PRPF4	0.00281683	0.264062	0.185	0.04	1
PARP1	0.00284319	0.362045	0.351	0.16	1
ARL6IP1	0.00286048	-0.470003	0.411	0.547	1
DCAF8	0.00294287	0.298198	0.225	0.067	1
PPA1	0.00317012	-0.326898	0.636	0.76	1
BLZF1	0.00318757	0.255009	0.159	0.027	1
SYAP1	0.00321877	0.312342	0.265	0.093	1
TMCO1	0.00322883	0.376597	0.397	0.2	1
RBM27	0.00335397	0.324315	0.344	0.147	1
BTG2	0.00353262	0.262219	0.205	0.053	1
CDK2AP1	0.00371615	-0.302368	0.04	0.147	1
STARD4-AS1	0.00376003	0.370499	0.536	0.307	1
BCL11B	0.00380066	-0.348002	0.311	0.507	1
AL355075.4	0.00400277	0.455849	0.709	0.533	1
HLA-B	0.0040152	0.628256	0.417	0.227	1
SPAG9	0.00418757	0.347675	0.483	0.28	1
C19orf53	0.00441131	0.323189	0.397	0.187	1
PHLDA1	0.00441769	-0.364681	0.093	0.227	1
NDUFB11	0.00449664	-0.429749	0.55	0.747	1
MTSS1	0.00465806	0.32162	0.311	0.133	1
ZNHIT6	0.00499612	0.264589	0.258	0.093	1
C6orf62	0.00510865	0.294195	0.331	0.147	1
ZNF22	0.00521618	0.289072	0.351	0.173	1
PCM1	0.00522184	0.369907	0.437	0.24	1
TMEM147	0.00538243	0.290538	0.205	0.067	1
RLIM	0.00565779	0.305769	0.285	0.12	1
SQLE	0.00571845	0.365923	0.536	0.32	1
ARL4C	0.00585186	0.425351	0.689	0.493	1
RAP1B	0.00588887	0.257636	0.252	0.093	1
TMA7	0.0058939	-0.37163	0.563	0.707	1
BAZ2A	0.00635489	0.301875	0.238	0.093	1
LINC02334	0.00660185	0.393538	0.119	0.013	1
AL627171.2	0.00673005	0.464993	0.98	0.947	1
MTRNR2L12	0.00684835	-0.396943	0.815	0.947	1
URI1	0.00694535	0.323838	0.377	0.2	1
RRM2B	0.007065	0.300517	0.311	0.133	1
VMA21	0.00734295	0.26857	0.245	0.093	1
DDX51	0.00769423	0.255009	0.139	0.027	1
NFIB	0.00774508	-0.336289	0.914	1	1
ZNF131	0.00777321	0.252221	0.338	0.16	1
PSAP	0.00791106	0.351412	0.404	0.227	1
SARAF	0.00807133	0.298722	0.662	0.427	1
ATP5MC2	0.00819845	-0.342161	0.662	0.8	1
MAP1B	0.00830331	-0.355807	0.947	1	1
PLCG2	0.00830971	0.497111	1	1	1
RPS7	0.00868995	-0.312425	0.987	0.987	1
DANCR	0.00873505	-0.380229	0.212	0.347	1
MIR100HG	0.00889476	0.326697	0.483	0.293	1
BZW1	0.00901822	-0.350623	0.311	0.467	1
IGFBP2	0.00925202	-0.276525	0.808	0.88	1
PSMB1	0.00981338	-0.340792	0.377	0.52	1
SUGT1	0.00985647	0.298796	0.417	0.227	1
LRRTM2	0.0103231	0.263432	0.344	0.173	1
PRRC2C	0.0104162	0.318063	0.616	0.4	1
CASC3	0.010433	0.318341	0.318	0.16	1
MT-CYB	0.0110066	-0.726796	0.881	0.96	1
CCND2	0.0113557	0.329551	0.808	0.747	1
FTX	0.0115616	0.26533	0.503	0.293	1
CIRBP	0.0118006	-0.328194	0.662	0.813	1
CWF19L2	0.0124762	0.324071	0.344	0.187	1
ATP5PB	0.0125914	-0.342569	0.219	0.36	1
SEMA3C	0.0128815	0.318885	0.258	0.12	1
GAPDH	0.0130215	-0.306375	0.94	1	1
NF1	0.013354	0.25065	0.245	0.107	1
KIF21A	0.0135506	0.435446	0.45	0.307	1
DDX24	0.0139011	0.258277	0.742	0.653	1
MRPL55	0.0139326	0.256004	0.305	0.147	1
CEP85L	0.0142938	0.407201	0.325	0.173	1
SRSF3	0.0144249	-0.422081	0.483	0.587	1
RPS6	0.0144277	-0.259324	0.927	0.96	1
MT-ATP6	0.0144987	-0.764438	0.934	0.987	1
HNRNPDL	0.0145377	-0.254934	0.669	0.84	1
ZEB2	0.014876	0.368926	0.417	0.267	1
CIC	0.0148943	0.250477	0.185	0.067	1
DOK6	0.0152082	-0.311242	0.093	0.2	1
MT-CO2	0.0154255	-0.756858	0.934	0.987	1
PUM1	0.0155202	0.266356	0.364	0.2	1
HSP90B1	0.015523	-0.366442	0.331	0.48	1
SRSF11	0.0157372	-0.293064	0.576	0.68	1
NDUFA4	0.0159428	-0.360493	0.94	0.973	1
MT-CO3	0.0161024	-0.674838	0.94	0.987	1
SRP54	0.0170105	0.286304	0.45	0.28	1
EID1	0.017171	-0.273616	0.841	0.947	1
NPM1	0.0173916	-0.307348	0.947	0.987	1
KIAA0408	0.0177688	0.370003	0.364	0.213	1
SNRNP200	0.0180041	0.325804	0.523	0.36	1
MFF	0.0181567	0.260503	0.219	0.093	1
ARL3	0.0182311	0.276571	0.331	0.187	1
GLUL	0.0182516	0.295269	0.219	0.093	1
PURPL	0.0184674	0.279175	0.185	0.067	1
FOS	0.0187691	-0.364429	0.172	0.307	1
ZNF428	0.01893	-0.300635	0.589	0.707	1
RBM33	0.0197107	0.279921	0.49	0.32	1
TOMM5	0.0199752	0.309643	0.344	0.2	1
ZNF106	0.0203006	0.252082	0.252	0.12	1
ACTG1	0.0203113	-0.445685	0.96	0.987	1
FASN	0.0205925	0.253448	0.159	0.053	1
BNIP3	0.0210389	-0.396609	0.483	0.613	1
C1orf61	0.0210829	-0.377648	0.762	0.92	1
PTMA	0.0211173	-0.327372	1	1	1
ZBTB41	0.0216542	0.280633	0.285	0.147	1
MAP3K2	0.0221686	0.329216	0.212	0.093	1
PAFAH1B3	0.0228288	-0.254699	0.53	0.707	1
SETD5	0.0235752	0.251178	0.384	0.227	1
MTCH1	0.0236549	0.275816	0.311	0.173	1
ARPC3	0.0238028	-0.290263	0.536	0.667	1
PRDX3	0.0247048	-0.260771	0.06	0.147	1
UBB	0.0247953	-0.35354	0.649	0.787	1
GNG5	0.0250488	-0.27548	0.079	0.173	1
NEAT1	0.0252241	0.605389	0.318	0.187	1
NSD2	0.0260455	0.253448	0.238	0.12	1
CCDC85B	0.0268983	-0.261125	0.079	0.173	1
PSMC4	0.0269236	0.284744	0.278	0.147	1
ZNF322	0.0270801	0.281315	0.305	0.173	1
TP53INP1	0.0278902	0.25065	0.225	0.107	1
CAMSAP2	0.027946	0.288382	0.232	0.12	1
ATAD1	0.0280812	-0.293379	0.159	0.267	1
PABPN1	0.0281906	-0.277647	0.166	0.28	1
UNC50	0.0286215	-0.261458	0.099	0.2	1
RACK1	0.0298897	-0.258856	1	1	1
AKR1A1	0.0300706	0.267752	0.272	0.147	1
MT-ND3	0.0304077	-0.600623	0.801	0.933	1
RPS9	0.0309622	-0.281883	0.993	1	1
GOLGA4	0.0312199	0.336766	0.596	0.453	1
CSNK1E	0.0312335	0.361862	0.53	0.413	1
ATP5MC1	0.0314132	0.283461	0.384	0.24	1
TRA2A	0.0315049	-0.318791	0.252	0.347	1
STXBP1	0.0321292	0.334368	0.252	0.133	1
ID1	0.0327221	-0.354853	0.152	0.28	1
2022-03-06	0.0334806	0.252429	0.477	0.32	1
LINC00662	0.0335486	0.259875	0.397	0.24	1
AKT3	0.0337929	0.27137	0.338	0.2	1
HERPUD1	0.0357205	0.314478	0.464	0.307	1
CCDC82	0.0362441	0.257353	0.47	0.307	1
LINGO1	0.0366582	-0.292758	0.086	0.173	1
FAM162A	0.0367813	-0.406476	0.278	0.387	1
WRN	0.0371292	0.259762	0.305	0.173	1
CALB2	0.0394448	0.347107	0.106	0.027	1
POLR3D	0.0397202	0.289974	0.258	0.147	1
BPTF	0.0407731	0.312342	0.497	0.333	1
NUCB2	0.0419767	-0.335814	0.185	0.293	1
TKT	0.0429337	-0.254005	0.404	0.52	1
SSR4	0.0431082	-0.278491	0.649	0.747	1
YBX1	0.0432185	-0.274763	1	0.987	1
PAIP2	0.0460625	-0.257804	0.377	0.493	1
PPP1R14B	0.0478691	-0.293012	0.49	0.627	1
COPA	0.0482655	0.26294	0.325	0.2	1
DNAJC3	0.0483544	-0.37882	0.146	0.24	1
ORC3	0.0485685	0.258903	0.225	0.12	1
ZIC2	0.0490595	0.3159	0.172	0.08	1
GSTA4	0.0496615	-0.277398	0.192	0.293	1
NOVA1	0.049683	-0.320788	0.238	0.333	1
TRIM24	0.0502503	0.252281	0.331	0.2	1
CANX	0.0503754	-0.418392	0.331	0.4	1
NDUFA13	0.0521424	-0.264447	0.497	0.653	1
PPP1R12A	0.0536986	0.254627	0.318	0.187	1
RMRP	0.0549201	0.281645	0.417	0.28	1
AC239799.2	0.0572372	-0.281391	0.073	0.147	1
SMAP1	0.0582705	-0.317708	0.166	0.253	1
GAP43	0.0587191	-0.31729	0.47	0.573	1
INPP5F	0.0589232	0.259762	0.265	0.16	1
AKAP12	0.0590119	0.390345	0.338	0.213	1
C9orf16	0.0594396	-0.297244	0.238	0.333	1
DEK	0.0602342	-0.257709	0.702	0.813	1
ACTB	0.0604676	-0.317901	0.921	0.987	1
GPR22	0.0606571	-0.40659	0.053	0.12	1
ATM	0.061652	0.265799	0.47	0.333	1
FABP7	0.0618444	-0.443573	0.781	0.88	1
PLXNA2	0.0635396	0.279175	0.219	0.12	1
CDK5R1	0.0645404	0.252155	0.291	0.187	1
SOX4	0.0670947	0.253047	1	1	1
AC004158.1	0.0684676	-0.282019	0.318	0.4	1
MRPS24	0.0685018	-0.327482	0.265	0.333	1
SNRPN	0.0686596	-0.271053	0.556	0.68	1
H3F3A	0.0696548	-0.335992	1	1	1
PCSK1N	0.0706138	-0.305362	0.629	0.76	1
MT-ND5	0.0708494	-0.43119	0.815	0.88	1
EEF2	0.0708825	-0.270867	0.94	0.947	1
ZNF91	0.0726662	0.255311	0.497	0.36	1
ARID4A	0.076498	-0.270295	0.245	0.333	1
VEGFA	0.076988	-0.385285	0.437	0.493	1
CCDC88A	0.0777832	0.358885	0.417	0.32	1
BTG3	0.0785825	0.307271	0.384	0.28	1
NCL	0.0796023	-0.284786	0.828	0.88	1
SEC11C	0.0799455	-0.330336	0.325	0.427	1
RBM25	0.083001	-0.286344	0.384	0.48	1
CDH2	0.0832345	-0.254271	0.219	0.333	1
HNRNPA0	0.0863853	-0.264341	0.265	0.36	1
SYNE2	0.0864064	-0.292117	0.285	0.387	1
CHCHD1	0.0872318	-0.280234	0.159	0.24	1
MTDH	0.088893	-0.265087	0.53	0.627	1
RPL14	0.090642	-0.250985	1	1	1
EIF4A3	0.0936422	-0.290138	0.185	0.267	1
TNRC6B	0.096064	0.276058	0.563	0.427	1
SLC25A6	0.101075	-0.315089	0.232	0.307	1
NFASC	0.101624	-0.2911	0.126	0.2	1
ARPC2	0.101771	-0.288831	0.523	0.613	1
PHF14	0.104222	0.268878	0.543	0.44	1
CEBPG	0.10867	-0.253823	0.225	0.307	1
DAAM1	0.11437	-0.264843	0.338	0.413	1
BCAS2	0.115183	-0.290912	0.245	0.32	1
RTF1	0.115811	0.25496	0.623	0.547	1
EIF4B	0.121233	-0.275922	0.444	0.507	1
YWHAE	0.137322	-0.270238	0.801	0.88	1
CALR	0.137675	-0.3745	0.238	0.293	1
RABAC1	0.143268	-0.285796	0.265	0.333	1
CCAR1	0.144895	-0.305325	0.159	0.227	1
LMAN1	0.147285	-0.267779	0.212	0.28	1
MT-ND4	0.147453	-0.415943	0.907	0.973	1
LINC01578	0.147557	-0.312978	0.715	0.8	1
HIST1H2AC	0.151952	-0.264683	0.331	0.387	1
SLF2	0.158891	-0.270114	0.172	0.253	1
TUBA1A	0.169449	-0.353423	1	1	1
MARCKSL1	0.174667	-0.250373	0.834	0.92	1
TLE4	0.196649	-0.27262	0.192	0.253	1
SNHG7	0.213284	-0.259564	0.377	0.427	1
ASB3	0.224918	0.276232	0.185	0.12	1
ID2	0.24002	-0.284267	0.51	0.56	1
SARNP	0.240261	-0.29589	0.219	0.267	1
IP6K2	0.254607	-0.27669	0.331	0.36	1
R3HDM1	0.26522	-0.267523	0.139	0.187	1
RNF165	0.275599	-0.291986	0.265	0.307	1
PFN2	0.31701	-0.276966	0.278	0.307	1
FAM92A	0.335623	-0.2592	0.139	0.173	1
TMSB4X	0.348392	-0.257223	0.993	1	1
HSPA5	0.421914	-0.441074	0.265	0.28	1
DLX5	0.486618	-0.353173	0.192	0.213	1
RAB14	0.507327	-0.251404	0.424	0.413	1
CADM1	0.584697	-0.255062	0.325	0.333	1
TUBB3	0.608901	-0.381134	0.907	0.947	1
NRXN1	0.709047	-0.251862	0.437	0.413	1
PDPK1	0.722123	-0.257107	0.185	0.187	1
B2M	0.84069	-0.304207	0.848	0.907	1
DDIT4	0.866932	-0.283925	0.457	0.427	1

## Sheet: iN4
	p_val	avg_log2FC	pct.1	pct.2	p_val_adj
RPS4Y1	4.33824e-46	1.74604	0.825	0	9.31767e-42
CHCHD2	8.09683e-29	1.26938	0.665	0.048	1.73904e-24
HLA-B	7.89216e-19	0.906739	0.898	0.548	1.69508e-14
FTL	9.02432e-15	0.883043	1	1	1.93824e-10
B2M	8.03976e-14	0.757707	0.927	0.712	1.72678e-09
HLA-A	1.81853e-13	0.883596	0.82	0.534	3.90584e-09
CD63	2.13685e-12	0.828051	0.845	0.603	4.58953e-08
IGFBP2	5.18968e-12	-1.06434	0.704	0.89	1.11464e-07
UBA52	5.43604e-12	0.440281	1	1	1.16755e-07
ARMCX1	1.73984e-11	0.461096	0.364	0.055	3.73683e-07
SERF2	2.8798e-11	0.651078	0.942	0.815	6.18523e-07
DDIT4	3.76887e-11	-0.816136	0.573	0.822	8.09478e-07
TOMM5	5.03081e-11	0.673249	0.869	0.568	1.08052e-06
RPLP2	9.34271e-11	0.371909	1	1	2.00663e-06
VEGFA	1.86334e-10	-0.811913	0.485	0.74	4.00207e-06
ARF4	2.31169e-10	0.586675	0.917	0.699	4.96504e-06
SRPRB	3.21794e-10	0.466798	0.495	0.164	6.91149e-06
VIM	4.40874e-10	-0.92192	0.51	0.753	9.46909e-06
BEX5	8.8514e-10	0.608976	0.592	0.295	1.9011e-05
CRIPT	9.28069e-10	0.510019	0.641	0.322	1.99331e-05
KRT10	1.31997e-09	0.627279	0.913	0.753	2.83503e-05
ACTG1	1.6337e-09	-0.61725	0.84	0.966	3.50885e-05
CEP85L	1.94495e-09	0.530363	0.495	0.185	4.17737e-05
MAP3K13	1.94604e-09	0.462452	0.481	0.171	4.1797e-05
CIAO2B	3.93181e-09	0.569322	0.951	0.774	8.44473e-05
MDH1	4.02487e-09	0.627479	0.772	0.493	8.64462e-05
GAS5	1.12096e-08	-0.572935	0.956	0.979	0.00024076
RPS21	2.10894e-08	0.322594	1	1	0.000452958
PRELID1	2.86811e-08	0.471144	0.85	0.61	0.000616013
PSMA5	3.37869e-08	0.495602	0.748	0.473	0.000725674
RNASEK	3.71552e-08	0.556141	0.762	0.514	0.000798019
MAGEH1	3.78331e-08	0.424532	0.699	0.397	0.000812579
INPP5F	4.63171e-08	0.481629	0.534	0.247	0.0009948
TM9SF2	5.26106e-08	0.42262	0.49	0.192	0.00112997
MLF2	5.66924e-08	0.441661	0.665	0.37	0.00121764
P4HA1	9.89569e-08	-0.50649	0.296	0.541	0.0021254
ATP5MD	1.14478e-07	0.460255	0.898	0.747	0.00245876
SEMA3C	1.37828e-07	0.615893	0.461	0.205	0.00296028
NDUFV3	2.56008e-07	0.444852	0.597	0.336	0.00549854
SEC61G	2.81801e-07	0.464001	0.971	0.863	0.00605253
GFPT1	2.84177e-07	0.439509	0.553	0.267	0.00610356
GPX4	2.91073e-07	0.483333	0.888	0.753	0.00625167
HLA-C	2.93906e-07	0.435394	0.83	0.61	0.00631251
PLCG2	3.04418e-07	0.413384	1	0.993	0.00653828
INSIG2	3.10296e-07	0.397039	0.437	0.185	0.00666453
LRRC59	3.43114e-07	0.408687	0.49	0.226	0.00736941
PDXDC1	3.86312e-07	0.419996	0.519	0.247	0.0082972
NUFIP2	4.03484e-07	0.474295	0.699	0.425	0.00866603
PSMC4	4.29981e-07	0.459735	0.68	0.411	0.00923513
KDELR2	4.33645e-07	0.469031	0.757	0.514	0.00931382
TOMM6	4.61871e-07	0.444878	0.893	0.651	0.00992007
GLRX5	4.78482e-07	0.392766	0.709	0.404	0.0102768
FAM177A1	5.35326e-07	0.430872	0.646	0.363	0.0114977
LSM3	5.47092e-07	0.45297	0.869	0.699	0.0117504
SEC61A1	5.52024e-07	0.43004	0.583	0.322	0.0118564
EIF5A	5.58918e-07	0.417215	0.631	0.349	0.0120044
ATP5MC1	5.66485e-07	0.457897	0.84	0.589	0.012167
MALAT1	5.71648e-07	0.301285	1	1	0.0122779
NDUFS3	6.0644e-07	0.318213	0.505	0.226	0.0130251
TMCO1	6.08807e-07	0.42153	0.704	0.432	0.013076
OST4	6.19668e-07	0.415548	0.786	0.514	0.0133092
PPM1K	6.43892e-07	0.395818	0.471	0.205	0.0138295
ZFAS1	6.51203e-07	-0.394695	0.932	0.979	0.0139865
MED10	6.83428e-07	0.409652	0.864	0.616	0.0146787
RPL31	7.03795e-07	0.362022	1	0.979	0.0151161
GOSR2	8.1582e-07	0.374145	0.607	0.322	0.0175222
MPC1	8.41729e-07	0.423325	0.631	0.342	0.0180787
RACK1	8.94935e-07	-0.398609	1	1	0.0192214
MCTS1	9.00767e-07	0.390849	0.524	0.253	0.0193467
SNU13	9.02638e-07	0.433014	0.917	0.795	0.0193868
NFE2L2	9.2036e-07	0.371328	0.432	0.178	0.0197675
ATL2	9.84294e-07	0.309414	0.335	0.11	0.0211407
BSCL2	1.12305e-06	0.444557	0.641	0.411	0.0241208
PSMD8	1.31435e-06	0.425026	0.893	0.705	0.0282296
PFDN6	1.45442e-06	0.386336	0.524	0.267	0.031238
NUPR1	1.47578e-06	0.424373	0.316	0.096	0.0316968
NDUFS5	1.55823e-06	0.462122	0.927	0.884	0.0334676
ISG20L2	1.56245e-06	0.285519	0.272	0.068	0.0335583
CCP110	1.61146e-06	0.298099	0.413	0.164	0.0346109
SEM1	1.71933e-06	0.428297	0.782	0.534	0.0369278
ATP5F1D	1.7634e-06	0.430158	0.709	0.473	0.0378743
ATP6V0B	1.76377e-06	0.380133	0.816	0.582	0.0378822
EPB41L3	2.22093e-06	0.280932	0.277	0.075	0.0477011
ZNF506	2.23063e-06	0.329725	0.383	0.151	0.0479094
LSM7	2.52609e-06	0.395859	0.913	0.733	0.0542554
PRPH	2.69117e-06	0.310679	0.218	0.041	0.057801
MMADHC	2.73293e-06	0.34247	0.573	0.322	0.0586978
MORF4L2	2.90805e-06	0.418024	0.908	0.788	0.0624591
ATOX1	2.96891e-06	0.395818	0.461	0.233	0.0637662
ATCAY	3.04345e-06	0.351321	0.398	0.171	0.0653671
SNF8	3.23583e-06	0.376412	0.485	0.247	0.0694991
NDUFA6	3.36719e-06	0.386368	0.67	0.418	0.0723206
MARCKSL1	3.57643e-06	-0.486408	0.587	0.774	0.0768146
RPS26	3.70917e-06	0.32511	0.995	0.993	0.0796656
GOLGA4	3.78682e-06	0.42954	0.806	0.582	0.0813332
LAMTOR5	4.00518e-06	0.407999	0.879	0.692	0.0860232
SYAP1	4.17918e-06	0.377106	0.456	0.212	0.0897604
SLC4A7	4.48327e-06	0.350589	0.602	0.349	0.0962918
RNF5	4.51472e-06	0.314966	0.471	0.226	0.0969671
COMMD6	4.53681e-06	0.326263	0.99	0.973	0.0974416
RPS10	4.71338e-06	0.40464	0.864	0.664	0.101234
IER3IP1	4.72451e-06	0.33268	0.704	0.418	0.101473
TBC1D23	4.82849e-06	0.326084	0.393	0.171	0.103706
RRM2B	4.85118e-06	0.399488	0.553	0.329	0.104194
GOLGA2	4.85421e-06	0.351321	0.612	0.363	0.104259
KDM3A	4.86101e-06	-0.559098	0.34	0.534	0.104405
ARPC3	5.03365e-06	0.435654	0.811	0.637	0.108113
OSBP	5.39766e-06	0.303184	0.495	0.247	0.115931
SF3A3	5.6768e-06	0.311817	0.422	0.185	0.121926
ZNF322	6.15693e-06	0.340385	0.529	0.288	0.132239
TMEM263	6.48255e-06	0.328237	0.553	0.288	0.139232
SEC22B	7.58732e-06	0.273566	0.413	0.178	0.16296
GAPDH	7.6009e-06	-0.531603	0.947	0.979	0.163252
PMP2	8.08687e-06	0.28978	0.17	0.021	0.17369
DDX18	8.24647e-06	0.349893	0.864	0.685	0.177118
CHD4	8.27445e-06	0.283543	0.427	0.192	0.177719
IFI27L2	8.45372e-06	0.38084	0.364	0.158	0.181569
PDHB	8.52155e-06	0.324354	0.417	0.192	0.183026
GNAS	8.57331e-06	0.334412	0.995	0.973	0.184138
RPS7	8.58445e-06	-0.299594	1	1	0.184377
SEC13	8.77765e-06	0.316556	0.544	0.295	0.188526
ARMCX3	1.008e-05	0.344626	0.709	0.445	0.216497
WSB1	1.03088e-05	-0.5374	0.718	0.788	0.221412
SLC30A5	1.10981e-05	0.253571	0.35	0.13	0.238364
CALU	1.13241e-05	0.358619	0.626	0.39	0.24322
SLC38A1	1.13313e-05	0.34682	0.544	0.288	0.243374
KCNQ1OT1	1.15517e-05	0.448581	0.655	0.397	0.248107
RPL11	1.25138e-05	-0.381923	1	1	0.268771
RTCB	1.26589e-05	0.334348	0.485	0.267	0.271887
SCRG1	1.27308e-05	0.468973	0.316	0.123	0.273433
ERP44	1.29097e-05	0.278149	0.364	0.151	0.277275
SYT13	1.31266e-05	0.28166	0.316	0.116	0.281934
RPS11	1.37657e-05	0.300066	1	1	0.29566
SEZ6L2	1.4122e-05	0.397455	0.534	0.308	0.303313
POLR3D	1.47183e-05	0.371727	0.49	0.274	0.31612
HIST1H4C	1.5245e-05	-0.563568	0.709	0.863	0.327432
TOPBP1	1.54456e-05	0.296873	0.408	0.185	0.331741
PURB	1.60944e-05	0.300232	0.49	0.247	0.345676
CIB1	1.65493e-05	0.308975	0.553	0.295	0.355447
HM13	1.74342e-05	0.344763	0.675	0.452	0.374451
HSP90B1	1.772e-05	-0.533388	0.451	0.637	0.38059
SUCO	1.82666e-05	0.383191	0.84	0.712	0.392329
FAM98A	1.87511e-05	0.294	0.383	0.178	0.402737
RRBP1	1.87574e-05	0.270878	0.311	0.116	0.402872
COPZ1	1.9901e-05	0.277189	0.451	0.226	0.427434
YIF1A	2.0063e-05	0.376567	0.505	0.267	0.430913
PHF20L1	2.01848e-05	0.363003	0.505	0.281	0.433528
DNTTIP1	2.14147e-05	0.302859	0.427	0.205	0.459944
EIF3I	2.28723e-05	0.334605	0.796	0.568	0.491252
MAGED2	2.30395e-05	0.311563	0.626	0.397	0.494842
ROMO1	2.34712e-05	0.345259	0.505	0.301	0.504114
FKBP1A	2.42695e-05	0.290595	0.442	0.226	0.521259
ITGB1	2.43246e-05	0.340426	0.466	0.253	0.522443
SPTY2D1	2.50254e-05	0.332483	0.476	0.267	0.537496
COPA	2.52503e-05	0.298966	0.568	0.322	0.542327
NOLC1	2.55694e-05	0.328006	0.476	0.247	0.54918
ZNRD1	2.56929e-05	0.256684	0.359	0.151	0.551832
NDUFS8	2.58025e-05	0.325537	0.723	0.493	0.554186
ANXA5	2.58515e-05	0.345938	0.369	0.171	0.555237
MRPL55	2.5894e-05	0.335341	0.602	0.37	0.556152
MAP1LC3B	2.71259e-05	0.477329	0.689	0.479	0.58261
SH3BGRL3	2.71689e-05	0.373743	0.587	0.37	0.583534
IMPDH2	2.72726e-05	0.299624	0.68	0.452	0.585762
PPP2CB	2.76611e-05	0.318541	0.422	0.212	0.594106
LARP1	2.8001e-05	0.327752	0.456	0.24	0.601405
RPL10	2.80511e-05	-0.336473	1	1	0.602482
YIPF2	2.81259e-05	0.255665	0.32	0.123	0.604087
BNIP3	2.87838e-05	-0.625	0.733	0.795	0.618218
LEPROTL1	2.99516e-05	0.275296	0.335	0.137	0.643301
EZR	2.99946e-05	0.314129	0.374	0.171	0.644224
PLD3	3.02085e-05	0.29182	0.393	0.192	0.648818
TPMT	3.02265e-05	0.251137	0.257	0.082	0.649206
SPSB3	3.06856e-05	0.309786	0.568	0.336	0.659066
MAGOH	3.35019e-05	0.277643	0.398	0.185	0.719554
RNF7	3.8727e-05	0.325978	0.728	0.507	0.831779
CREB3	3.91658e-05	0.33124	0.515	0.308	0.841203
NORAD	3.96681e-05	0.431686	0.709	0.527	0.851991
CPEB4	4.03182e-05	0.269781	0.388	0.178	0.865954
POLE3	4.11751e-05	0.334266	0.515	0.295	0.884359
EPRS	4.18155e-05	0.346223	0.626	0.404	0.898114
PHGDH	4.19888e-05	0.396409	0.529	0.308	0.901835
AL355075.4	4.24153e-05	0.29451	0.694	0.486	0.910995
DDX50	4.30506e-05	0.264385	0.447	0.219	0.92464
GNG4	4.31755e-05	0.393952	0.578	0.39	0.927324
NONO	4.4836e-05	0.305692	0.524	0.295	0.962988
VMP1	4.49897e-05	0.251406	0.408	0.192	0.966288
EIF3G	4.51369e-05	0.299791	0.699	0.459	0.969449
DNAJC25	4.54509e-05	0.272711	0.364	0.164	0.976195
RER1	4.55604e-05	0.295082	0.437	0.226	0.978545
PSMB6	4.61526e-05	0.346439	0.757	0.596	0.991266
RPS16	4.61823e-05	0.273252	1	1	0.991903
PANK3	4.68053e-05	0.373556	0.432	0.247	1
KHDC4	4.8187e-05	0.277512	0.374	0.178	1
MZT1	4.89752e-05	0.367923	0.573	0.349	1
TMEM30A	4.91495e-05	0.335973	0.529	0.322	1
ANKRD11	4.9989e-05	0.327294	0.704	0.486	1
HMGB1	5.03519e-05	-0.35901	0.898	0.952	1
GOLGB1	5.09946e-05	0.398758	0.563	0.342	1
NDUFA1	5.13798e-05	0.367887	0.704	0.521	1
ACBD3	5.35527e-05	0.377793	0.485	0.288	1
A1BG	5.44429e-05	0.326131	0.485	0.267	1
PAG1	5.48977e-05	0.264713	0.272	0.096	1
ZNF331	5.89582e-05	0.250254	0.49	0.26	1
NDUFA5	6.01826e-05	0.307773	0.859	0.651	1
MCMBP	6.07331e-05	0.272711	0.359	0.164	1
IK	6.10053e-05	0.3076	0.5	0.288	1
ESCO1	6.2784e-05	0.252192	0.301	0.116	1
OCIAD1	6.30765e-05	0.377306	0.665	0.479	1
TRAP1	6.79173e-05	0.259398	0.398	0.199	1
TRAPPC1	6.87776e-05	0.292557	0.505	0.288	1
DAD1	7.00568e-05	0.35468	0.869	0.74	1
GADD45G	7.14421e-05	-0.598899	0.257	0.445	1
FUNDC2	7.20596e-05	0.29182	0.447	0.247	1
RAB3A	7.53697e-05	0.310679	0.417	0.219	1
ZNF428	8.02756e-05	-0.389415	0.442	0.596	1
CSNK2B	8.07425e-05	0.342859	0.529	0.336	1
ADK	8.12803e-05	0.268395	0.393	0.192	1
SND1	8.4573e-05	0.295729	0.461	0.247	1
C19orf81	8.49115e-05	0.270347	0.34	0.158	1
DNAJC3	8.77909e-05	0.345916	0.495	0.295	1
PGM3	8.96137e-05	0.268139	0.621	0.363	1
UFM1	9.03199e-05	0.361305	0.767	0.61	1
SRP54	9.16418e-05	0.38481	0.762	0.562	1
POLR2L	9.32267e-05	0.271998	0.437	0.233	1
UBE2B	9.4246e-05	0.314192	0.733	0.527	1
MYEF2	9.42586e-05	0.318213	0.432	0.233	1
YIPF4	9.77702e-05	0.257672	0.485	0.267	1
SNHG6	0.000100199	-0.346497	0.947	1	1
HSPB11	0.000102795	0.283543	0.408	0.205	1
UQCRQ	0.000105688	0.375811	0.752	0.596	1
CAMLG	0.00010855	0.293448	0.854	0.719	1
MT1F	0.000109134	0.320917	0.607	0.425	1
PFKFB3	0.000111231	-0.251563	0.083	0.226	1
COPG1	0.000113384	0.255397	0.34	0.158	1
DCAF13	0.000113774	0.35544	0.689	0.479	1
CCND2	0.000117916	0.317312	0.772	0.603	1
LCMT1	0.000119367	0.277048	0.432	0.24	1
SLC25A37	0.000120004	0.253965	0.451	0.253	1
GSTP1	0.000120887	0.373908	0.772	0.623	1
BRD2	0.000122571	0.279741	0.481	0.267	1
ATF7IP	0.000124324	0.263373	0.413	0.219	1
CDKN1A	0.000125382	0.390276	0.65	0.432	1
COPB1	0.000125812	0.332654	0.612	0.411	1
JTB	0.000127274	0.313308	0.597	0.377	1
MCFD2	0.000127368	0.272174	0.379	0.192	1
RPL12	0.000128757	-0.330011	0.985	1	1
CALM3	0.000128862	0.32046	0.65	0.473	1
FOS	0.000130374	-0.471027	0.078	0.212	1
GOLT1B	0.000130672	0.327167	0.655	0.452	1
NDUFB3	0.000135235	0.264537	0.646	0.411	1
VAMP2	0.000136738	0.287006	0.772	0.575	1
JAK1	0.000137895	0.478974	0.583	0.397	1
RPS27	0.000141113	0.279159	1	1	1
GPS2	0.00014292	0.260053	0.34	0.158	1
ZNF766	0.000146184	0.264136	0.374	0.185	1
PEG10	0.000154137	0.40254	0.684	0.521	1
EIF3E	0.000154668	-0.366839	0.835	0.89	1
JPT1	0.000158358	-0.377735	0.777	0.842	1
PRDX5	0.000162978	0.27642	0.801	0.644	1
GTF2F1	0.000164849	0.267993	0.461	0.26	1
SDR39U1	0.000167741	0.255665	0.301	0.13	1
SKA2	0.000169608	0.262316	0.388	0.199	1
NACA	0.000170325	-0.28106	1	1	1
NELFE	0.000172656	0.250038	0.345	0.158	1
LTN1	0.000176354	0.296395	0.578	0.404	1
TRMT112	0.000176569	0.31023	0.908	0.801	1
TMF1	0.000178368	0.341304	0.684	0.466	1
GABPB1-AS1	0.000184709	-0.37442	0.374	0.541	1
NPRL2	0.000197558	0.28279	0.437	0.247	1
FRG1	0.000199137	0.252713	0.413	0.219	1
CKS2	0.0001999	0.275145	0.549	0.329	1
PTS	0.000203162	0.272174	0.364	0.185	1
YES1	0.000216163	0.270265	0.403	0.219	1
COPB2	0.000217402	0.335201	0.617	0.425	1
MT-ND2	0.000230256	0.986384	0.806	0.801	1
MAP9	0.000235837	0.273627	0.563	0.349	1
BTG1	0.000241812	-0.284625	0.903	0.966	1
RNH1	0.000244948	0.308194	0.617	0.432	1
STMN1	0.000245953	-0.411284	0.558	0.699	1
ZBTB41	0.000255498	0.26021	0.403	0.212	1
PAIP2	0.000257341	0.283682	0.684	0.466	1
TMBIM6	0.000264508	0.260053	0.665	0.459	1
H3F3A	0.000269563	-0.309851	0.976	0.993	1
GNG3	0.000274531	0.262636	0.461	0.26	1
EBLN3P	0.00028227	0.277284	0.597	0.39	1
MRPL33	0.00028548	0.299393	0.534	0.342	1
NDUFA7	0.000288514	0.28981	0.408	0.226	1
ATM	0.000299012	0.25439	0.563	0.356	1
USP11	0.000311275	0.286051	0.505	0.315	1
CLPP	0.000320106	0.279741	0.476	0.288	1
DDT	0.000336424	0.271998	0.597	0.418	1
NDFIP1	0.000343196	0.254204	0.583	0.37	1
SEC31A	0.000356842	0.264937	0.767	0.575	1
NARS	0.000360471	0.308271	0.612	0.438	1
PCMT1	0.000439414	0.260926	0.602	0.418	1
SQLE	0.000440383	0.333059	0.66	0.466	1
CYC1	0.000464374	0.317911	0.456	0.295	1
NANS	0.000468016	0.281937	0.597	0.397	1
RBX1	0.000489156	0.259033	0.66	0.486	1
TMEM205	0.000501681	0.297925	0.466	0.288	1
UQCR11	0.000529796	0.329754	0.733	0.582	1
COX6A1	0.000573559	0.25685	0.947	0.904	1
KPNB1	0.000574647	0.334617	0.534	0.377	1
PLPP5	0.000588052	0.276255	0.471	0.308	1
ATP5ME	0.000590251	0.273986	0.806	0.685	1
EBNA1BP2	0.000603026	0.262617	0.495	0.295	1
CLINT1	0.000609577	0.278693	0.519	0.342	1
C11orf58	0.000613054	0.269383	0.786	0.637	1
DAAM1	0.000630724	0.295331	0.515	0.329	1
PJA2	0.000642499	0.363146	0.854	0.726	1
ATP5MF	0.000652197	0.261351	0.718	0.514	1
MIA3	0.000677503	0.273842	0.544	0.363	1
GET1	0.000760038	0.275372	0.456	0.288	1
OIP5-AS1	0.000768326	0.296622	0.519	0.356	1
ZNF791	0.000772215	0.256812	0.408	0.24	1
SLC25A3	0.000774527	0.274256	0.825	0.685	1
MINDY2	0.000798532	0.269289	0.451	0.274	1
SMAD5	0.000825147	0.261703	0.529	0.336	1
RTRAF	0.000866	0.273842	0.762	0.603	1
EIF3K	0.000877469	0.303652	0.752	0.603	1
SNHG12	0.00091745	-0.257338	0.238	0.397	1
EPB41L4A-AS1	0.00097484	-0.383712	0.587	0.678	1
COX7A2	0.00101796	0.28114	0.951	0.897	1
RO60	0.00105349	0.257523	0.583	0.397	1
MT-ND1	0.00106058	0.694805	0.782	0.774	1
MED19	0.00106885	0.27808	0.5	0.336	1
HSP90AA1	0.00110248	-0.428886	0.981	1	1
NGRN	0.00112548	0.270401	0.675	0.493	1
TMEM167A	0.00119731	0.299979	0.549	0.39	1
FAM162A	0.00122283	-0.342455	0.607	0.719	1
CYCS	0.00129277	0.316514	0.903	0.863	1
HERPUD1	0.00144477	0.253737	0.66	0.479	1
TOP1	0.00147252	0.28992	0.587	0.425	1
IDS	0.00156665	0.251635	0.544	0.377	1
HIST2H2BE	0.0015681	-0.327549	0.078	0.185	1
CSNK1A1	0.00158814	0.299033	0.553	0.411	1
LAPTM4A	0.00160288	0.28928	0.806	0.664	1
ZNRD2	0.00169699	0.279741	0.447	0.281	1
TLE1	0.00175511	-0.284579	0.204	0.336	1
PRDX1	0.00178849	0.275456	0.883	0.795	1
MROH8	0.00183612	-0.283827	0.053	0.151	1
PPA1	0.00188136	-0.259426	0.733	0.815	1
PPIB	0.00199551	-0.420325	0.568	0.623	1
DYNC1LI2	0.00203295	0.263941	0.573	0.432	1
NOVA1	0.00204631	-0.296502	0.175	0.301	1
MRPL52	0.0021034	0.277048	0.519	0.363	1
LINC01578	0.00210732	-0.34745	0.437	0.562	1
SCD	0.00225515	0.267836	0.578	0.418	1
PRPF6	0.00230034	0.275565	0.456	0.308	1
SELENOM	0.00239804	0.276033	0.612	0.452	1
TM9SF3	0.00256837	0.298393	0.505	0.356	1
PSMB3	0.00273641	0.276864	0.699	0.562	1
SEC63	0.00280389	0.25032	0.626	0.459	1
AL627171.2	0.0028397	0.333829	0.956	0.877	1
MT-ND5	0.00289234	0.475506	0.631	0.5	1
SNHG14	0.0030448	0.283583	0.845	0.74	1
EIF4A1	0.00335384	-0.273921	0.811	0.904	1
ID2	0.00339949	-0.387742	0.238	0.363	1
LARS	0.00347387	0.274383	0.646	0.507	1
CSDE1	0.00351384	0.258639	0.602	0.473	1
TUBA1B	0.00365047	0.259745	0.816	0.685	1
PEBP1	0.0041313	-0.310716	0.888	0.911	1
PSMD12	0.00462825	0.265164	0.539	0.404	1
FADS1	0.00477989	0.264812	0.447	0.295	1
ARGLU1	0.00518377	-0.348353	0.5	0.568	1
PANTR1	0.00612693	-0.314473	0.126	0.226	1
RPL36AL	0.0072149	-0.269777	0.694	0.753	1
ENO1	0.00753527	-0.346259	0.796	0.849	1
EEF1B2	0.00849438	0.259802	0.85	0.801	1
PNRC1	0.00869208	-0.352286	0.578	0.644	1
ARL6IP1	0.0103538	-0.286957	0.456	0.534	1
SEC11C	0.0103843	-0.35844	0.587	0.644	1
UBC	0.0112309	-0.338414	0.976	0.959	1
HNRNPDL	0.0118319	-0.299484	0.607	0.664	1
HSPA8	0.0118909	-0.27927	0.845	0.904	1
DNAJB9	0.0122495	-0.322178	0.393	0.466	1
MT1M	0.0128898	-1.041	0.044	0.11	1
NEAT1	0.0135547	0.35203	0.379	0.267	1
TUBB3	0.0140786	-0.295588	0.782	0.863	1
IER5L	0.0162356	-0.299784	0.16	0.253	1
CCT2	0.0174089	-0.277538	0.563	0.596	1
ACTB	0.0174523	-0.269265	0.811	0.829	1
ARL4C	0.0174596	0.251561	0.612	0.479	1
SPCS2	0.0200352	-0.314838	0.583	0.616	1
POU3F3	0.0200507	-0.288503	0.495	0.589	1
TUBB2B	0.0299149	-0.264668	0.883	0.904	1
SAP30	0.0304374	-0.33056	0.437	0.493	1
RTF1	0.0316607	-0.258516	0.519	0.575	1
CANX	0.031691	-0.377581	0.534	0.575	1
SRSF3	0.0336155	-0.338528	0.476	0.541	1
PTN	0.0385816	-0.28079	0.306	0.384	1
CAMK2N1	0.041074	-0.266763	0.791	0.822	1
GPM6A	0.0466279	-0.273657	0.534	0.603	1
MT1X	0.0485325	0.392724	0.995	0.979	1
H3F3B	0.0638665	-0.250048	1	1	1
HSPA5	0.0860941	-0.32326	0.476	0.521	1
FABP5	0.207435	0.377793	0.515	0.507	1
SNHG7	0.219925	-0.265822	0.534	0.534	1
CSRP2	0.251362	-0.260691	0.549	0.541	1
MT1G	0.735517	-0.503843	0.374	0.37	1
MT-ATP6	0.797982	0.250771	0.689	0.774	1
MT-ND4	0.926806	0.389153	0.782	0.856	1

[truncated: 11 more sheets: iN3, iN2, iN1, PC1, PC2, RG-div1, RG-div2, RG-div3, RG1, RG2, RG3]
